# Supplementary material for: Differentiation granules, a dynamic regulator of T. brucei development.
Source: Research Square preprint supplement (doi:10.21203/rs.3.rs-3442788/v1), 2023-10-20
Supplement: Supplementary file 1 [file 075546aa19c8dc36b2a6c4a1.xlsx]

## Sheet: starvation
gene.id	uniProt.id	Product.Description	symbol	alba4_condB_vs_alba4.dyrk_condB_p.val	alba4_condB_vs_J1339_condB_p.val	alba4_condC_vs_alba4_condB_p.val	alba4_condC_vs_alba4.dyrk_condC_p.val	alba4_condC_vs_J1339_condC_p.val	alba4.dyrk_condB_vs_J1339_condB_p.val	alba4.dyrk_condC_vs_alba4.dyrk_condB_p.val	alba4.dyrk_condC_vs_J1339_condC_p.val	alba4_condB_vs_alba4.dyrk_condB_ratio	alba4_condB_vs_J1339_condB_ratio	alba4_condC_vs_alba4_condB_ratio	alba4_condC_vs_alba4.dyrk_condC_ratio	alba4_condC_vs_J1339_condC_ratio	alba4.dyrk_condB_vs_J1339_condB_ratio	alba4.dyrk_condC_vs_alba4.dyrk_condB_ratio	alba4.dyrk_condC_vs_J1339_condC_ratio	short.name	OrthologGroup	Tryptag_location	DeepLoc_location	lcr_005_Position	Data_Cayla2020	Data_Fritz2015	Data_Sif	Data_Dejung2016upSS	Data_Dejung2016upSL	Data_Bevka2021alba3SS	Data_Bevka2021alba3Proc	Data_CCR	Curated.GO.Components	Curated.GO.Functions	Curated.GO.Processes
KPYK2_TRYBB	P30616	NA	NA	0.259642	0.285626	0.012747	0.240387	0.552946	0.858371	0.895285	0.581783	0.402	0.34	-0.871	-0.419	-0.208	-0.0622	-0.0502	0.211	KPYK2_TRYBB	NA	NA	NA	NA	FALSE	FALSE	FALSE	FALSE	FALSE	FALSE	FALSE	FALSE	NA	NA	NA
Tb09.v4.0015	Q4FKV4	hypothetical protein	NA	0.631978	0.340693	0.795283	0.274653	0.0691286	0.191529	0.225093	0.461283	-0.259	0.466	0.125	0.6	1.04	0.724	-0.734	0.438	Tb09.v4.0015	OG5_247734	ND	Nucleus	ND	FALSE	FALSE	FALSE	FALSE	FALSE	FALSE	FALSE	FALSE	N/A	N/A	N/A
Tb10.61.0150	Q387Q3	NA	NA	0.00243493	0.119775	0.0785104	0.988861	0.287972	0.0453486	0.000226971	0.336498	1.76	0.708	0.811	0.0068	0.528	-1.05	2.56	0.521	Tb10.61.0150	NA	NA	NA	NA	FALSE	FALSE	FALSE	FALSE	FALSE	FALSE	FALSE	FALSE	NA	NA	NA
Tb11.02.5430	Q384R2	hypothetical protein, conserved	NA	0.0769467	0.808481	0.336872	0.42354	0.241815	0.11363	0.114522	0.722197	-0.482	-0.0558	0.225	0.208	0.309	0.426	-0.465	0.1	Tb11.02.5430	OG5_157172	ND	Nucleus	298-317;370-402	FALSE	FALSE	FALSE	FALSE	FALSE	FALSE	FALSE	FALSE	N/A	N/A	N/A
Tb11.0845	Q4FKD8	dynein light chain LC8, putative	DYNLL2	0.0120663	0.00413989	0.18691	0.956592	0.675243	0.863836	0.171184	0.66581	-1.64	-1.74	0.709	-0.0317	0.245	-0.0999	-0.903	0.276	DYNLL2	OG5_127498	ND	Cytoplasm	ND	FALSE	FALSE	FALSE	FALSE	FALSE	FALSE	FALSE	FALSE	axoneme	dynein intermediate chain binding	microtubule-based process
Tb11.1220	Q4FKC2	hypothetical protein	NA	0.0704282	0.444237	0.344474	0.320181	0.692267	0.2309	0.0741642	0.576565	-1.28	-0.459	0.57	0.672	0.263	0.816	-1.38	-0.408	Tb11.1220	OG5_145930	ND	Nucleus	ND	FALSE	FALSE	FALSE	FALSE	FALSE	FALSE	FALSE	FALSE	N/A	N/A	N/A
Tb11.1380	Q4FKA8	Cytoskeleton-associated protein 46 kDa	CAP46	0.182748	0.966146	0.365397	0.267014	0.0860353	0.194372	0.597929	0.0158011	-0.745	-0.0205	0.445	-0.614	0.98	0.724	0.314	1.59	CAP46	OG5_148776	ND	Cytoplasm	ND	FALSE	FALSE	FALSE	FALSE	FALSE	FALSE	FALSE	FALSE	cytoskeleton	N/A	mitotic cleavage furrow formation
Tb927.1.120	Q8IFI8	retrotransposon hot spot protein 4 (RHS4), putative	RHS4	0.00237121	0.44955	0.114721	0.305156	0.16849	0.000599528	5.02275e-05	0.729015	1.3	-0.245	0.53	-0.375	-0.512	-1.55	2.21	-0.136	RHS4	OG5_126555	nucleolus, nucleus(weak)	Nucleus	ND	FALSE	FALSE	FALSE	FALSE	FALSE	FALSE	FALSE	FALSE	cytoplasm	mRNA binding	mRNA export from nucleus
Tb927.1.1750	Q4GZ44	conserved protein, unknown function	NA	0.155898	0.236644	0.806435	0.658873	0.121544	0.700021	0.265159	0.29324	-0.542	-0.4	-0.0808	-0.163	-0.596	0.142	-0.46	-0.433	Tb927.1.1750	OG5_166718	ND	Nucleus	ND	FALSE	FALSE	FALSE	FALSE	FALSE	FALSE	FALSE	FALSE	nucleus	N/A	N/A
Tb927.1.1840	Q4GZ35	conserved protein, unknown function	NA	0.760986	0.575708	0.51642	0.503855	0.365367	0.842588	0.719888	0.82328	0.363	0.6	-0.697	-0.803	-1.1	0.237	0.469	-0.292	Tb927.1.1840	OG5_161860	ND	Cytoplasm	ND	FALSE	FALSE	FALSE	FALSE	FALSE	FALSE	FALSE	FALSE	N/A	N/A	N/A
Tb927.1.220	Q8IFI0	retrotransposon hot spot protein 1 (RHS1), putative	RHS1	0.120861	0.111648	0.171971	0.00761483	0.440357	0.896108	0.0250762	0.00306291	0.959	0.881	-0.748	1.8	-0.461	-0.0773	-1.59	-2.27	RHS1	OG5_126555	nucleoplasm(50%)	Cytoplasm	28-56;821-832	FALSE	TRUE	FALSE	FALSE	FALSE	FALSE	FALSE	FALSE	nucleoplasm	N/A	N/A
Tb927.1.2260	Q4GYZ5	small myristoylated protein 1-2	SMP1-2	0.706762	0.256264	0.517248	0.0277477	0.068615	0.170982	0.0289354	0.00118573	-0.288	0.794	0.446	-1.84	1.48	1.08	2	3.32	SMP1-2	OG5_138266	flagellar pocket, pellicular membrane, flagellar membrane(weak), cell tip(distal)	Mitochondrion	119-128	FALSE	FALSE	FALSE	FALSE	FALSE	FALSE	FALSE	FALSE	cell tip	N/A	cilium assembly
Tb927.1.2330	Q4GYY6	beta tubulin	NA	0.49765	0.574005	0.576126	0.398012	0.920236	0.245734	0.0781325	0.493765	0.249	-0.184	0.183	-0.312	-0.0364	-0.433	0.743	0.275	Tb927.1.2330	OG5_126611	cytoplasm(75%)	Cytoplasm	140-149;431-440	FALSE	FALSE	FALSE	FALSE	FALSE	FALSE	FALSE	FALSE	cytoplasm	GTP binding	microtubule cytoskeleton organization
Tb927.1.2340	Q4GYY5	alpha tubulin	NA	0.154589	0.970337	0.729324	0.477698	0.899072	0.14615	0.101626	0.446145	0.464	-0.0104	-0.0974	-0.225	0.0399	-0.475	0.592	0.265	Tb927.1.2340	OG5_126605	cytoplasm, flagellar cytoplasm	Cytoplasm	ND	FALSE	FALSE	FALSE	FALSE	FALSE	FALSE	FALSE	FALSE	ciliary basal body	GTP binding	microtubule cytoskeleton organization
Tb927.1.2430	Q4GYX7	histone H3, putative	H3	0.496994	0.46407	0.169371	0.657644	0.8531	0.191875	0.181418	0.567497	0.203	-0.196	0.377	0.132	-0.0549	-0.399	0.448	-0.187	H3	OG5_126569	ND	Nucleus	15-26	FALSE	FALSE	FALSE	FALSE	FALSE	FALSE	FALSE	FALSE	nucleoplasm	DNA binding	N/A
Tb927.1.3180	Q4GYQ5	40S ribosomal protein S11, putative	S11	0.373025	0.112546	0.0129492	0.936976	0.243848	0.0287292	0.00793996	0.256069	0.259	-0.427	0.716	0.0227	-0.343	-0.686	0.953	-0.366	S11	OG5_126986	cytoplasm(patchy)	Cytoplasm	ND	FALSE	FALSE	FALSE	FALSE	FALSE	FALSE	FALSE	FALSE	cytoplasm	structural constituent of ribosome	translation
Tb927.1.3830	P13377	NA	NA	0.922897	0.303136	0.272046	0.0868816	0.543317	0.405618	0.417249	0.285384	0.0671	0.65	-0.696	-1.25	-0.424	0.583	0.623	0.828	Tb927.1.3830	OG5_126980	cytoplasm	Peroxisome	ND	FALSE	FALSE	FALSE	FALSE	FALSE	FALSE	FALSE	FALSE	cytoplasm	glucose-6-phosphate isomerase activity	gluconeogenesis
Tb927.1.4040	Q4GYH3	hypothetical protein, conserved	NA	0.995321	0.219338	0.14694	0.798343	0.675141	0.267027	0.156583	0.88058	-0.0018	0.347	-0.415	0.0787	0.129	0.349	-0.495	0.0506	Tb927.1.4040	OG5_148364	ND	Nucleus	106-117;177-238;244-263;278-287;342-351;401-425	FALSE	FALSE	FALSE	FALSE	FALSE	FALSE	FALSE	FALSE	ciliary basal body	N/A	N/A
Tb927.1.4180	Q4GYG0	leucine-rich repeat protein (LRRP), putative	NA	0.197511	0.159377	0.760461	0.0838477	0.0782782	0.981386	0.837497	0.972574	0.367	0.361	0.0755	0.505	0.515	-0.00645	-0.0622	0.0104	Tb927.1.4180	OG5_135162	ND	Cytoplasm	227-247;273-282;710-720;723-744	FALSE	FALSE	FALSE	FALSE	FALSE	TRUE	FALSE	FALSE	axoneme	N/A	N/A
Tb927.1.4280	Q4GYF0	hypothetical protein, conserved	NA	0.900843	0.490159	1.18836e-05	0.0918537	0.0243006	0.620102	0.00185887	0.526445	0.0469	0.234	2.16	0.668	0.931	0.187	1.54	0.263	Tb927.1.4280	OG5_174128	ND	Cytoplasm	443-452	TRUE	FALSE	FALSE	FALSE	FALSE	FALSE	FALSE	FALSE	cortical cytoskeleton	N/A	posttranscriptional regulation of gene expression
Tb927.1.4310	Q4GYE7	Flagellum attachment zone protein 2	FAZ2	0.113067	0.838564	0.979308	0.848653	0.362745	0.154702	0.111371	0.31757	-1.04	-0.115	0.0146	0.12	-0.58	0.928	-1.15	-0.7	FAZ2	OG5_144200	flagellum attachment zone	Cytoplasm	169-178;188-217;764-795;800-865;1148-1157	FALSE	FALSE	FALSE	FALSE	FALSE	FALSE	FALSE	FALSE	cell tip	protein binding	N/A
Tb927.1.700	Q4GZG4	NA	NA	0.0115601	0.173266	0.00100212	0.0625933	0.00967906	0.000894348	0.279922	0.393082	0.874	-0.387	-1.11	-0.61	-0.901	-1.26	0.371	-0.291	Tb927.1.700	OG5_126776	ND	Peroxisome	ND	FALSE	TRUE	FALSE	FALSE	FALSE	FALSE	FALSE	FALSE	cytosol	ADP binding	gluconeogenesis
Tb927.1.990	Q4GZB9	Enkuring domain-containig protein	NA	0.0291983	0.618347	0.955196	0.211894	0.607805	0.0687743	0.00378951	0.116271	-1.53	-0.288	-0.0324	0.828	-0.332	1.25	-2.39	-1.16	Tb927.1.990	OG5_149999	axoneme	Nucleus	ND	FALSE	FALSE	FALSE	FALSE	FALSE	FALSE	FALSE	FALSE	axoneme	calmodulin binding	N/A
Tb927.10.10080	Q389W9	hypothetical protein, conserved	NA	0.71819	0.439686	0.666261	0.0487979	0.437041	0.736692	0.0720401	0.0171536	-0.343	-0.663	0.367	2.01	-0.746	-0.32	-1.98	-2.75	Tb927.10.10080	OG5_174131	ND	Nucleus	10-19;30-40	FALSE	FALSE	FALSE	FALSE	FALSE	FALSE	FALSE	FALSE	axoneme	N/A	N/A
Tb927.10.10360	Q389U1	Microtubule-associated repetitive protein	MARP	0.650415	0.0165161	0.962549	0.298071	0.176779	0.0690789	0.608129	0.760016	0.225	1.18	0.0208	0.525	0.69	0.955	-0.279	0.166	MARP	OG5_136174	ND	Nucleus	30-40;3027-3048;3059-3082	FALSE	FALSE	FALSE	FALSE	FALSE	FALSE	FALSE	FALSE	ciliary basal body	microtubule binding	N/A
Tb927.10.10590	Q389T1	histone H2B, putative	NA	0.00909847	0.00573347	0.29284	0.00170283	0.410598	0.91228	0.119596	0.0156467	-0.938	-0.903	0.304	-1.2	-0.264	0.0349	0.564	0.934	Tb927.10.10590	OG5_126572	ND	Cytoplasm	ND	FALSE	FALSE	FALSE	FALSE	FALSE	FALSE	FALSE	FALSE	nucleoplasm	DNA binding	chromosome organization
Tb927.10.1060	Q38CD4	T-complex protein 1, delta subunit, putative	TCP-1-delta	0.139492	0.291577	0.407947	0.775878	0.20448	0.567424	0.335229	0.358427	-1.04	-0.648	0.505	0.192	0.88	0.387	-0.723	0.688	TCP-1-delta	OG5_127832	ND	Cytoplasm	ND	FALSE	TRUE	FALSE	FALSE	FALSE	FALSE	FALSE	FALSE	chaperonin-containing T-complex	unfolded protein binding	protein folding
Tb927.10.10890	Q389P1	heat shock protein, putative	NA	0.146703	0.172336	0.017535	0.478956	0.951498	0.806393	0.167314	0.483027	0.431	0.361	-0.675	0.204	-0.0174	-0.0701	-0.448	-0.222	Tb927.10.10890	OG5_126623	cytoplasm(patchy)	Cytoplasm	206-267;530-540;682-691	FALSE	TRUE	FALSE	FALSE	FALSE	FALSE	FALSE	FALSE	cell surface	unfolded protein binding	cellular response to heat
Tb927.10.1090	Q38CD1	40S ribosomal protein S23, putative	RPS23	0.219562	0.588552	0.177536	0.376496	0.36093	0.096525	0.00676336	0.977769	0.527	-0.203	0.521	-0.375	-0.388	-0.731	1.42	-0.0128	RPS23	OG5_127029	ND	Cytoplasm	ND	FALSE	FALSE	FALSE	FALSE	FALSE	FALSE	FALSE	FALSE	cytosolic small ribosomal subunit	RNA binding	translation
Tb927.10.1100	Q38CD0	60S ribosomal protein L9, putative	NA	2.82036e-07	0.968397	0.000321455	0.469897	0.380718	2.68555e-07	3.3865e-09	0.884384	2.79	-0.0111	1.3	-0.23	-0.28	-2.8	4.32	-0.0501	Tb927.10.1100	OG5_126993	cytoplasm(patchy), nucleolus	Cytoplasm	ND	FALSE	FALSE	FALSE	FALSE	FALSE	FALSE	FALSE	FALSE	cytoplasm	structural constituent of ribosome	cytoplasmic translation
Tb927.10.11080	Q389N1	paraflagellar rod protein	NA	0.702882	0.378786	0.863448	0.339919	0.416826	0.678424	0.182999	0.117773	0.379	0.791	0.152	-0.961	0.814	0.412	1.49	1.78	Tb927.10.11080	OG5_135978	ND	Nucleus	70-79;459-974	FALSE	FALSE	FALSE	FALSE	FALSE	FALSE	FALSE	FALSE	ciliary basal body	N/A	posttranscriptional regulation of gene expression
Tb927.10.11330	Q389K7	EF-hand domain pair, putative	NA	0.237665	0.621544	0.726795	0.663612	0.889795	0.447441	0.0895474	0.601428	-0.56	-0.205	-0.145	0.202	-0.0641	0.355	-0.907	-0.266	Tb927.10.11330	OG5_143947	ND	Nucleus	ND	FALSE	FALSE	FALSE	FALSE	FALSE	FALSE	FALSE	FALSE	axoneme	calcium ion binding	calcium-mediated signaling
Tb927.10.11390	Q389K1	60S ribosomal protein L6, putative	NA	0.589355	0.160912	0.167505	0.440216	0.0396583	0.45356	0.349784	0.200598	-0.161	-0.385	-0.379	-0.231	-0.66	-0.225	-0.309	-0.428	Tb927.10.11390	OG5_127206	ND	Cytoplasm	6-15;121-140	FALSE	FALSE	FALSE	FALSE	FALSE	FALSE	FALSE	FALSE	cytoplasm	RNA binding	cytoplasmic translation
Tb927.10.11450	Q389J5	TFIIF-stimulated CTD phosphatase, putative	NA	0.391802	0.584745	0.124627	0.309883	0.218858	0.187853	0.669954	0.834388	-0.218	0.123	0.36	0.26	0.317	0.341	-0.117	0.0575	Tb927.10.11450	OG5_148177	cytoplasm(reticulated)	Nucleus	101-110;139-149;313-322	FALSE	FALSE	FALSE	FALSE	FALSE	FALSE	FALSE	FALSE	cytoplasm	phosphoprotein phosphatase activity	N/A
Tb927.10.11540	Q389I7	40S ribosomal protein S3, putative	RPS3	0.573696	0.548543	0.00383816	0.281921	0.0970435	0.278957	0.000625378	0.557622	0.238	-0.228	1.28	-0.463	-0.735	-0.466	1.98	-0.272	RPS3	OG5_126820	cytoplasm(patchy)	Cytoplasm	ND	FALSE	FALSE	FALSE	FALSE	FALSE	FALSE	FALSE	FALSE	cytoplasm	mRNA binding	ribosome biogenesis
Tb927.10.12030	Q389D9	hypothetical protein, conserved	NA	0.00967534	0.209888	0.126292	0.376182	0.36384	0.000927387	0.006082	0.112715	0.918	-0.361	0.447	0.281	-0.288	-1.28	1.08	-0.569	Tb927.10.12030	OG5_144833	ND	Nucleus	ND	FALSE	FALSE	FALSE	FALSE	FALSE	FALSE	FALSE	FALSE	nucleolus	N/A	N/A
Tb927.10.12430	Q389A0	Noc2p family, putative	NA	0.491966	0.166132	0.105931	0.770831	0.537656	0.557948	0.628583	0.410674	-0.411	-0.761	0.9	0.173	-0.368	-0.35	0.316	-0.541	Tb927.10.12430	OG5_128976	ND	Nucleus	21-63;108-117;239-249	FALSE	FALSE	FALSE	FALSE	FALSE	FALSE	FALSE	FALSE	Noc1p-Noc2p complex	N/A	ribosomal large subunit biogenesis
Tb927.10.12590	Q388Y4	hypothetical protein, conserved	NA	0.989598	0.0513203	0.163523	0.00688788	0.130868	0.0756543	0.112286	0.17808	-0.00497	0.712	0.492	1.18	0.6	0.717	-0.694	-0.581	Tb927.10.12590	OG5_131378	flagellum(patchy), basal body(strong), cytoplasm	Nucleus	1-277;279-350;467-477	FALSE	FALSE	FALSE	FALSE	FALSE	FALSE	FALSE	FALSE	axonemal dynein complex	dynein heavy chain binding	cilium movement
Tb927.10.12680	Q388X5	60S ribosomal protein L34, putative	NA	0.55339	0.474362	0.572881	0.218943	0.979584	0.226408	0.293371	0.250565	0.241	-0.26	-0.205	0.51	-0.0103	-0.501	-0.474	-0.52	Tb927.10.12680	OG5_127025	cytoplasm(reticulated, points)	Nucleus	102-170	FALSE	FALSE	FALSE	FALSE	FALSE	FALSE	FALSE	FALSE	cytoplasm	structural constituent of ribosome	ribosome biogenesis
Tb927.10.12710	Q388X2	heat shock protein 110, putative	HSP110	0.738188	0.699879	0.003126	0.736453	0.0891469	0.991395	0.0389962	0.197464	0.199	0.206	-1.86	-0.201	-1.07	0.00642	-1.46	-0.866	HSP110	OG5_127167	cytoplasm	Cytoplasm	515-524;765-775	FALSE	TRUE	FALSE	FALSE	FALSE	FALSE	FALSE	FALSE	cytoplasm	N/A	response to heat
Tb927.10.12870	Q388V9	Basal body protein	BBP120	0.0714532	0.988397	0.00574124	0.00334327	0.201779	0.0697548	0.0345409	0.0664606	-0.506	0.00344	0.754	0.913	0.347	0.509	-0.665	-0.565	BBP120	OG5_158213	cytoplasm(points), flagellar cytoplasm	Nucleus	875-885;1067-1086	FALSE	FALSE	FALSE	FALSE	FALSE	FALSE	FALSE	FALSE	ciliary basal body	N/A	N/A
Tb927.10.12960	Q388V0	Ras-related protein Rab5A	RAB5A	0.420315	0.741807	0.222428	0.862472	0.55011	0.276999	0.903742	0.483289	-0.223	0.0808	0.307	0.0474	-0.165	0.304	0.0363	-0.212	RAB5A	OG5_126724	ND	Golgi_apparatus	66-75	FALSE	TRUE	FALSE	FALSE	FALSE	FALSE	FALSE	FALSE	endocytic vesicle	GTPase activity	intracellular protein transport
Tb927.10.13180	Q388S9	Nrap protein, putative	NA	0.778471	0.747621	0.937238	0.0724707	0.162492	0.570877	0.0542046	0.00745506	-0.217	0.222	-0.0543	1.47	-1.12	0.439	-1.74	-2.58	Tb927.10.13180	OG5_128598	nucleolus	Nucleus	ND	FALSE	FALSE	FALSE	FALSE	FALSE	FALSE	FALSE	FALSE	CURI complex	N/A	rRNA processing
Tb927.10.14140	P30615	NA	NA	0.17972	0.135192	0.723049	0.384049	0.467866	0.0132379	0.0909788	0.891425	-0.594	0.597	0.136	0.378	0.314	1.19	-0.836	-0.0641	Tb927.10.14140	OG5_126685	cytoplasm(strong, patchy), flagellar cytoplasm(weak)	Cytoplasm	ND	FALSE	FALSE	FALSE	FALSE	FALSE	FALSE	FALSE	FALSE	cytoplasm	mRNA binding	glycolytic process
Tb927.10.14490	Q388F3	hypothetical protein, conserved	NA	0.0571815	0.575842	0.995177	0.921356	0.441512	0.0215125	0.0927263	0.538039	1.53	-0.378	0.00406	0.0741	0.584	-1.9	1.46	0.51	Tb927.10.14490	OG5_148897	ND	Nucleus	88-119	FALSE	FALSE	FALSE	FALSE	FALSE	FALSE	FALSE	FALSE	cilium	N/A	N/A
Tb927.10.14500	Q388F2	hypothetical protein, conserved	NA	0.0929359	0.858748	0.595431	0.518909	0.198523	0.123171	0.159717	0.540423	1.38	0.124	0.372	0.507	1.03	-1.25	1.24	0.526	Tb927.10.14500	OG5_148898	ND	Nucleus	ND	FALSE	FALSE	FALSE	FALSE	FALSE	FALSE	FALSE	FALSE	axoneme	N/A	N/A
Tb927.10.14520	Q388F0	Basal body protein	BBP52	0.184083	0.403471	0.0417443	0.649248	0.0636416	0.0477088	0.345214	0.0399836	1.58	-0.873	-2.27	0.527	-2.28	-2.46	-1.21	-2.81	BBP52	OG5_148899	ND	Nucleus	183-217	FALSE	FALSE	FALSE	FALSE	FALSE	FALSE	FALSE	FALSE	ciliary basal body	N/A	N/A
Tb927.10.14580	Q385T6	60S ribosomal protein L17, putative	NA	0.560745	0.954441	0.098194	0.587212	0.929004	0.527498	0.18056	0.677716	-0.415	0.0362	1.1	-0.387	-0.0632	0.451	1.07	0.324	Tb927.10.14580	OG5_126900	endoplasmic reticulum	Cytoplasm	ND	FALSE	FALSE	FALSE	FALSE	FALSE	FALSE	FALSE	FALSE	cytoplasm	structural constituent of ribosome	cytoplasmic translation
Tb927.10.14630	Q388E0	fibrillarin, putative	NA	0.38998	0.0230169	0.121564	0.970359	0.936397	0.185566	0.578042	0.968944	-0.446	-1.15	0.741	-0.019	-0.0409	-0.7	0.314	-0.0218	Tb927.10.14630	OG5_127191	nucleolus(strong), nucleus(points, weak)	Mitochondrion	ND	FALSE	FALSE	FALSE	FALSE	FALSE	FALSE	FALSE	FALSE	Cajal body	RNA binding	box C/D RNA 3'-end processing
Tb927.10.14700	Q388D4	hypothetical protein, conserved	NA	0.909222	0.37374	0.151378	0.204382	0.0117455	0.364157	0.935517	0.176593	-0.0562	0.398	0.657	0.644	1.4	0.454	-0.0437	0.755	Tb927.10.14700	OG5_148222	cytoplasm(patchy)	Nucleus	91-110	TRUE	FALSE	FALSE	FALSE	FALSE	FALSE	FALSE	FALSE	cytoplasm	mRNA binding	N/A
Tb927.10.14710	Q388D3	40S ribosomal protein S2, putative	RPS2	0.741876	0.392298	0.00449794	0.0604946	0.0352515	0.65722	0.000214908	0.796768	0.147	0.346	1.32	-0.895	-1.02	0.199	2.36	-0.126	RPS2	OG5_126722	ND	Nucleus	1-56	FALSE	FALSE	FALSE	FALSE	FALSE	FALSE	FALSE	FALSE	cytoplasm	structural constituent of ribosome	translation
Tb927.10.14770	Q388C7	Associated kinase of Tb14-3-3	AKB1	0.27206	0.467521	0.0086214	0.0706204	0.215902	0.0913788	0.102728	0.557012	0.515	-0.301	1.23	0.88	0.583	-0.815	0.86	-0.297	AKB1	OG5_151372	ND	Cytoplasm	113-122;499-518;537-556	FALSE	FALSE	FALSE	FALSE	FALSE	FALSE	FALSE	FALSE	ciliary basal body	ATP binding	intracellular signal transduction
Tb927.10.14830	Q388C4	Mitochondrial ADP/ATP carrier protein 5b	MCP5b	0.226963	0.230539	0.632249	0.641706	0.108371	0.888756	0.254499	0.065192	-1.16	-1.03	0.402	0.437	-1.58	0.131	-1.2	-2.01	MCP5b	OG5_126841	ND	Mitochondrion	ND	FALSE	TRUE	FALSE	FALSE	FALSE	FALSE	FALSE	FALSE	mitochondrial inner membrane	N/A	transport
Tb927.10.14870	Q388B9	hypothetical protein, conserved	NA	0.0933886	0.31491	0.597283	0.200558	0.193503	0.0160646	0.405444	0.0266599	0.72	-0.373	0.193	0.537	-0.546	-1.09	0.376	-1.08	Tb927.10.14870	OG5_148500	cytoplasm, nucleus(points), flagellar cytoplasm, nuclear lumen	Nucleus	624-681	FALSE	FALSE	FALSE	FALSE	FALSE	FALSE	FALSE	FALSE	ciliary plasm	N/A	N/A
Tb927.10.14890	Q388B7	C-terminal motor kinesin, putative	KIFC1	0.896262	0.719903	0.307372	0.173657	0.288236	0.848583	0.752268	0.768268	-0.0582	-0.143	-0.415	-0.628	-0.484	-0.0853	0.155	0.144	KIFC1	OG5_126975	ND	Cytoplasm	365-383;442-452	FALSE	FALSE	FALSE	FALSE	FALSE	FALSE	FALSE	FALSE	cytoplasm	ATP binding	cytoskeleton-dependent intracellular transport
Tb927.10.14990	Q388A9	intraflagellar transport protein 80	IFT80	0.290984	0.0771262	0.189368	0.218035	0.0830419	0.553174	0.310253	0.607545	-1.02	-1.59	1.15	1.2	1.74	-0.565	-1.07	0.536	IFT80	OG5_129685	intraflagellar transport particle, cytoplasm(weak)	Cytoplasm	ND	FALSE	TRUE	FALSE	FALSE	FALSE	FALSE	FALSE	FALSE	centrosome	N/A	cilium assembly
Tb927.10.15120	Q586C2	40S ribosomal protein S13, putative	NA	0.927664	0.322919	0.274141	0.431938	0.120482	0.423818	0.787496	0.0410454	0.0632	0.626	0.695	0.553	-1.13	0.563	0.206	-1.68	Tb927.10.15120	OG5_127089	cytoplasm(reticulated)	Mitochondrion	ND	FALSE	FALSE	FALSE	FALSE	FALSE	FALSE	FALSE	FALSE	ciliary transition zone	small ribosomal subunit rRNA binding	translation
Tb927.10.15440	Q387W9	hypothetical protein, conserved	NA	0.546026	0.860857	0.0592607	0.301176	0.0987209	0.653279	0.228359	0.536697	-0.472	-0.122	-1.4	-0.819	-1.35	0.35	-1.05	-0.53	Tb927.10.15440	OG5_148507	ND	Cytoplasm	ND	FALSE	FALSE	FALSE	FALSE	FALSE	FALSE	FALSE	FALSE	bilobe structure	N/A	N/A
Tb927.10.15660	Q387U8	hypothetical protein, conserved	NA	0.852295	0.802753	0.242676	0.982456	0.398349	0.682731	0.435897	0.428337	-0.0514	0.0616	0.295	0.00606	-0.236	0.113	0.238	-0.242	Tb927.10.15660	OG5_162243	ND	Nucleus	135-144;186-196;220-229;549-558	FALSE	FALSE	FALSE	FALSE	FALSE	FALSE	TRUE	FALSE	kinetoplast	N/A	N/A
Tb927.10.15750	Q387T9	Tripartite attachment complex protein 197	p197	0.760207	0.572781	0.691084	0.54316	0.934543	0.421627	0.255835	0.629964	-0.237	0.394	-0.277	0.475	0.0638	0.631	-0.989	-0.411	p197	OG5_143891	basal body, pro-basal body	Cytoplasm	392-415;1216-1235;1348-1357;1568-1587;1695-1714	FALSE	FALSE	FALSE	FALSE	FALSE	FALSE	FALSE	FALSE	ciliary basal body	protein-containing complex binding	mitochondrial genome maintenance
Tb927.10.15760	Q387T8	Cytoskeleton-associated protein 36 kDa	CAP36	0.729968	0.963506	0.0749019	0.224796	0.499137	0.760766	0.0085197	0.60748	0.129	0.0152	0.629	-0.464	-0.254	-0.114	1.22	0.211	CAP36	OG5_147632	ND	Nucleus	83-110	FALSE	FALSE	FALSE	FALSE	FALSE	FALSE	FALSE	FALSE	cortical cytoskeleton	N/A	mitotic cleavage furrow ingression
Tb927.10.190	Q38CL9	40S ribosomal protein S6, putative	NA	0.523985	0.00970618	0.0657098	0.121037	0.217513	0.00492866	0.00217818	0.748176	-0.164	0.672	-0.449	0.415	0.325	0.836	-1.03	-0.0903	Tb927.10.190	OG5_126964	ND	Cytoplasm	217-230	FALSE	FALSE	FALSE	FALSE	FALSE	FALSE	FALSE	FALSE	ribosome	mRNA binding	regulation of cell growth
Tb927.10.2010	Q38C42	hexokinase	HK1	0.010585	0.192153	0.14247	0.441826	0.505227	0.107938	0.0502554	0.92312	0.956	0.398	-0.451	-0.257	-0.222	-0.558	0.762	0.035	HK1	OG5_126743	ND	Cytoplasm	ND	FALSE	FALSE	FALSE	FALSE	FALSE	FALSE	FALSE	FALSE	cytosol	fructokinase activity	carbohydrate metabolic process
Tb927.10.2090	P86939	NA	NA	0.0191759	0.721572	0.948816	0.705531	0.500723	0.0360179	0.0528725	0.784437	0.737	0.0907	0.0163	0.108	0.193	-0.646	0.645	0.0852	Tb927.10.2090	OG5_126631	cytoplasm	Cytoplasm	ND	FALSE	FALSE	FALSE	FALSE	FALSE	FALSE	FALSE	FALSE	cytoplasm	GTPase activity	calcium-mediated signaling
Tb927.10.220	Q38AW9	60S ribosomal protein L37a, putative	NA	0.235499	0.865174	0.452097	0.258502	0.290884	0.184887	0.137445	0.942757	-1.14	0.142	0.636	1.08	1.01	1.28	-1.59	-0.0736	Tb927.10.220	OG5_127166	ND	Cytoplasm	ND	FALSE	FALSE	FALSE	FALSE	FALSE	FALSE	FALSE	FALSE	cytoplasm	structural constituent of ribosome	translation
Tb927.10.2240	Q38C20	RNA binding protein	NA	0.985549	0.443297	0.0761796	0.0281237	0.51237	0.503194	0.524483	0.127772	0.00719	0.275	0.667	0.952	0.262	0.268	-0.279	-0.691	Tb927.10.2240	OG5_150754	cytoplasm	Nucleus	165-202;404-425;471-482	FALSE	TRUE	FALSE	FALSE	FALSE	FALSE	FALSE	FALSE	cytoplasm	mRNA binding	posttranscriptional regulation of gene expression
Tb927.10.2380	Q38C06	Tetratricopeptide repeat, putative	NA	0.831754	0.867162	0.591144	0.278459	0.481528	0.949814	0.449632	0.113078	-0.287	-0.202	0.653	1.5	-0.96	0.0851	-1.13	-2.46	Tb927.10.2380	OG5_131078	axoneme, cytoplasm	Nucleus	ND	FALSE	FALSE	FALSE	FALSE	FALSE	FALSE	FALSE	FALSE	axoneme	N/A	N/A
Tb927.10.2440	Q38C01	Metacaspase-4	MCA4	0.0744026	0.174385	0.0835703	0.00405255	0.0382483	0.00624364	0.00456754	0.316992	-0.787	0.523	0.68	1.4	0.933	1.31	-1.5	-0.464	MCA4	OG5_182511	ND	Cell_membrane	ND	FALSE	FALSE	FALSE	FALSE	FALSE	FALSE	TRUE	FALSE	ciliary membrane	cysteine-type endopeptidase activity	proteolysis
Tb927.10.2580	Q38BY7	Nucleolar protein 12 (25kDa), putative	NA	0.0600681	0.360086	0.0669892	0.773913	0.714292	0.251052	0.982816	0.942299	-1.04	-0.43	0.901	-0.149	-0.19	0.608	0.0122	-0.041	Tb927.10.2580	OG5_152066	nucleolus	Nucleus	16-25;271-290	FALSE	FALSE	FALSE	FALSE	FALSE	FALSE	FALSE	FALSE	nucleolus	RNA binding	N/A
Tb927.10.2700	Q38BX5	predicted WD40 repeat protein	NA	0.43886	0.416479	0.810169	0.0858925	0.246112	0.14426	0.26626	0.014298	0.453	-0.425	-0.124	1.05	-0.687	-0.878	-0.72	-1.74	Tb927.10.2700	OG5_128227	ND	Nucleus	664-689	FALSE	TRUE	FALSE	FALSE	FALSE	FALSE	FALSE	FALSE	nucleolus	snoRNA binding	N/A
Tb927.10.2840	Q57XX0	ribosomal protein S25, putative	NA	0.906841	0.408623	0.974805	0.76857	0.411821	0.393118	0.688782	0.626077	0.0866	-0.553	0.0209	-0.218	-0.614	-0.64	0.325	-0.396	Tb927.10.2840	OG5_126998	ND	Cytoplasm	23-35	FALSE	FALSE	FALSE	FALSE	FALSE	FALSE	FALSE	FALSE	cytoplasm	structural constituent of ribosome	translation
Tb927.10.2890	Q9NDH8	NA	NA	0.123412	0.406869	0.0125543	0.578628	0.298349	0.397155	0.756054	0.647938	0.633	0.295	-0.987	-0.22	-0.417	-0.337	-0.134	-0.197	Tb927.10.2890	OG5_126698	nucleoplasm, cytoplasm	Cytoplasm	115-124	FALSE	FALSE	FALSE	FALSE	FALSE	FALSE	FALSE	FALSE	ciliary plasm	magnesium ion binding	glycolytic process
Tb927.10.3200	Q38BS6	U2 splicing auxiliary factor, putative	U2AF35	0.0584233	0.676803	0.503165	0.584634	0.696202	0.115382	0.0885784	0.885317	-1.12	-0.207	0.333	0.304	0.216	0.91	-1.09	-0.0873	U2AF35	OG5_127450	nucleoplasm	Nucleus	174-229	FALSE	TRUE	FALSE	FALSE	FALSE	FALSE	FALSE	FALSE	U2AF complex	RNA binding	RNA splicing
Tb927.10.3260	Q38BS1	Long-chain-fatty-acid--CoA ligase 5 (EC 6.2.1.3) (Long-chain acyl-CoA synthetase 5) (LACS 5), putative	LACS5	0.289612	0.658422	0.829847	0.742352	0.151536	0.497604	0.611511	0.112892	-0.617	-0.227	0.11	-0.188	0.85	0.391	-0.319	1.04	LACS5	OG5_126601	flagellar pocket(ring), plasma membrane	Cell_membrane	ND	FALSE	FALSE	FALSE	FALSE	FALSE	FALSE	FALSE	FALSE	ciliary plasm	catalytic activity	fatty acid elongation
Tb927.10.3660	Q38BN3	aspartate aminotransferase	cASAT	0.0317567	0.766609	0.497328	0.641233	0.475865	0.0187586	0.00659719	0.818407	-1.14	0.13	-0.299	0.229	0.352	1.27	-1.67	0.123	cASAT	OG5_126737	cytoplasm, flagellar cytoplasm	Peroxisome	ND	FALSE	FALSE	FALSE	FALSE	FALSE	FALSE	FALSE	FALSE	ciliary plasm	L-aspartate:2-oxoglutarate aminotransferase activity	L-methionine salvage from methylthioadenosine
Tb927.10.3840	Q382C4	60S ribosomal protein L18a, putative	NA	0.0275079	0.0880756	0.0554464	0.0112893	0.00558586	0.427329	0.0523842	0.752814	-0.825	-0.55	0.627	-0.977	-1.1	0.275	0.779	-0.118	Tb927.10.3840	OG5_127130	cytoplasm(patchy)	Cytoplasm	ND	FALSE	FALSE	FALSE	FALSE	FALSE	FALSE	FALSE	FALSE	cytoplasm	mRNA binding	translation
Tb927.10.3930	Q38BK7	40S ribosomal protein S3A, putative	NA	0.267271	0.422466	0.101358	0.211593	0.0583924	0.0787918	0.426846	0.504754	0.326	-0.209	-0.442	-0.369	-0.581	-0.535	0.253	-0.212	Tb927.10.3930	OG5_126852	cytoplasm(patchy)	Nucleus	10-20	FALSE	FALSE	FALSE	FALSE	FALSE	FALSE	FALSE	FALSE	cytoplasm	mRNA binding	translation
Tb927.10.3990	Q38BK1	DHH1	DHH1	0.774629	0.19838	0.597254	0.563374	0.28042	0.375551	0.869274	0.635653	-0.102	-0.423	-0.17	-0.208	-0.394	-0.321	-0.0644	-0.186	DHH1	OG5_127804	ND	Cytoplasm	ND	FALSE	TRUE	FALSE	FALSE	FALSE	FALSE	FALSE	FALSE	P-body	ATP binding	P-body assembly
Tb927.10.4110	Q38BI8	NA	NA	0.390824	0.577065	0.22199	0.129648	0.057637	0.184209	0.00495475	0.683301	0.29	-0.167	0.374	-0.526	-0.676	-0.457	1.19	-0.149	Tb927.10.4110	OG5_127005	cytoplasm(patchy)	Cytoplasm	ND	FALSE	FALSE	FALSE	FALSE	FALSE	FALSE	FALSE	FALSE	cytoplasm	RNA binding	translation
Tb927.10.450	Q38CJ3	Component of motile flagella 62	CMF62	0.462433	0.00102888	0.0683978	0.157441	0.00168949	0.0110575	0.364439	0.0484158	0.232	1.13	0.541	0.458	1.18	0.895	0.315	0.726	CMF62	OG5_130500	ND	Nucleus	97-413	FALSE	FALSE	FALSE	FALSE	FALSE	FALSE	FALSE	FALSE	ciliary basal body	N/A	cilium-dependent cell motility
Tb927.10.4570	Q38BE4	elongation factor 2	NA	0.260947	0.463188	0.351007	0.774484	0.233647	0.0859111	0.592236	0.39934	1.66	-0.955	-1.22	-0.413	-1.76	-2.61	0.85	-1.35	Tb927.10.4570	OG5_126923	ND	Cytoplasm	ND	FALSE	TRUE	FALSE	FALSE	FALSE	FALSE	FALSE	FALSE	ciliary plasm	GTP binding	translation
Tb927.10.5030	Q38B98	ubiquitin/ribosomal protein S27a, putative	NA	0.113004	0.909603	0.752731	0.201445	0.743441	0.134802	0.00890377	0.373939	-1.5	-0.0918	-0.255	1.19	0.296	1.41	-2.94	-0.893	Tb927.10.5030	OG5_127221	cytoplasm(patchy)	Nucleus	67-89	FALSE	FALSE	FALSE	FALSE	FALSE	FALSE	FALSE	FALSE	cytoplasm	heme binding	modification-dependent protein catabolic process
Tb927.10.5340	Q38B69	40S ribosomal protein S18, putative	RPS18	0.763656	0.806232	0.66319	0.792239	0.364226	0.604258	0.389308	0.551084	0.374	-0.273	0.485	-0.327	-1.14	-0.646	1.19	-0.816	RPS18	OG5_126668	ND	Cytoplasm	ND	FALSE	FALSE	FALSE	FALSE	FALSE	FALSE	FALSE	FALSE	cytoplasm	RNA binding	translation
Tb927.10.5370	Q38B66	40S ribosomal protein S10, putative	NA	0.545231	0.17531	0.424888	0.136337	0.470281	0.52228	0.202465	0.0521755	-0.349	-0.718	0.414	0.888	-0.417	-0.369	-0.824	-1.31	Tb927.10.5370	OG5_127137	cytoplasm(points)	Nucleus	89-172	FALSE	FALSE	FALSE	FALSE	FALSE	FALSE	FALSE	FALSE	cytoplasm	RNA binding	ribosomal small subunit assembly
Tb927.10.5430	Q38B61	Flagellar C1a complex subunit C1a-32, putative	NA	0.705039	0.542823	0.857048	0.780171	0.981035	0.360955	0.811708	0.782198	0.263	-0.379	0.112	0.193	-0.0164	-0.642	0.181	-0.21	Tb927.10.5430	OG5_132970	axoneme, cytoplasm	Nucleus	ND	FALSE	FALSE	FALSE	FALSE	FALSE	FALSE	FALSE	FALSE	axoneme	N/A	N/A
Tb927.10.5460	Q38B58	60S ribosomal protein L24, putative	NA	0.106743	0.533502	0.326673	0.317541	0.507603	0.268728	0.167209	0.749825	0.94	0.312	0.496	0.566	0.371	-0.629	0.871	-0.195	Tb927.10.5460	OG5_127273	cytoplasm(patchy)	Mitochondrion	ND	FALSE	FALSE	FALSE	FALSE	FALSE	FALSE	FALSE	FALSE	cytoplasm	RNA binding	assembly of large subunit precursor of preribosome
Tb927.10.560	Q38CI4	40S ribosomal proteins S11, putative	NA	0.0103141	0.618234	0.000945429	0.143403	0.18356	0.0253378	0.0533633	0.892458	-1.46	-0.225	1.84	-0.766	-0.691	1.23	1.14	0.0746	Tb927.10.560	OG5_126986	cytoplasm(patchy, 75%)	Cytoplasm	ND	FALSE	FALSE	FALSE	FALSE	FALSE	FALSE	FALSE	FALSE	cytoplasm	mRNA binding	translation
Tb927.10.5610	Q57VP3	40S ribosomal protein S9, putative	NA	0.0464793	0.00699469	0.0192676	0.00335343	0.00259197	0.535646	0.00446639	0.908211	-0.557	-0.719	0.602	-0.897	-0.93	-0.162	0.943	-0.0328	Tb927.10.5610	OG5_126983	cytoplasm(reticulated)	Cytoplasm	ND	FALSE	FALSE	FALSE	FALSE	FALSE	FALSE	FALSE	FALSE	ciliary plasm	RNA binding	positive regulation of translational fidelity
Tb927.10.5620	Q38B42	fructose-bisphosphate aldolase, glycosomal	ALD	0.90414	0.095823	0.0991041	0.973362	0.100272	0.162628	0.215066	0.123844	0.0401	0.521	-0.516	-0.0111	0.574	0.481	-0.465	0.585	ALD	OG5_127143	ND	Cytoplasm	ND	FALSE	FALSE	FALSE	FALSE	FALSE	FALSE	FALSE	FALSE	cytosol	fructose-bisphosphate aldolase activity	fructose 1,6-bisphosphate metabolic process
Tb927.10.5770	Q38B27	Valosin-containing protein	VCP	0.216532	0.168412	0.00162687	0.162852	0.104053	0.996291	0.532061	0.812509	0.451	0.452	-1.21	-0.513	-0.605	0.00165	-0.245	-0.0923	VCP	OG5_126926	nucleoplasm(50%), cytoplasm(50%)	Cytoplasm	764-777	FALSE	TRUE	FALSE	FALSE	FALSE	FALSE	FALSE	FALSE	VCP-NPL4-UFD1 AAA ATPase complex	ATP hydrolysis activity	ER-associated misfolded protein catabolic process
Tb927.10.5810	Q38B23	The ARF-like 2 binding protein BART, putative	NA	0.189907	0.462426	0.927434	0.100577	0.186739	0.0590009	0.0106865	0.741331	-0.801	0.393	-0.0483	1.02	0.807	1.19	-1.87	-0.215	Tb927.10.5810	OG5_132012	plasma membrane, flagellar membrane	Cytoplasm	195-237;243-302;335-363	FALSE	TRUE	FALSE	FALSE	FALSE	FALSE	FALSE	FALSE	axoneme	N/A	response to drug
Tb927.10.6000	Q38B05	hypothetical protein, conserved	NA	0.469579	0.483235	0.00882748	0.0654444	0.880317	0.922464	0.980144	0.114376	-0.334	-0.289	1.22	0.896	0.0688	0.0445	-0.0125	-0.827	Tb927.10.6000	OG5_148110	ND	Cytoplasm	ND	FALSE	FALSE	FALSE	FALSE	FALSE	FALSE	FALSE	FALSE	N/A	N/A	N/A
Tb927.10.6050	Q38B01	clathrin heavy chain	CHC	0.273858	0.244596	0.0712674	0.848428	0.27891	0.95884	0.713483	0.409439	1.05	0.997	-1.6	-0.179	-1.03	-0.0482	-0.377	-0.855	CHC	OG5_127480	endocytic, cell tip(posterior)	Cytoplasm	ND	FALSE	TRUE	FALSE	FALSE	FALSE	FALSE	FALSE	FALSE	cell tip	clathrin light chain binding	receptor-mediated endocytosis
Tb927.10.6350	Q38AX1	trypanin	trypanin	0.257675	0.0195904	0.786464	0.987932	0.273225	0.00324191	0.401376	0.321858	0.401	-0.8	-0.084	-0.00524	-0.388	-1.2	0.322	-0.382	trypanin	OG5_129322	ND	Cytoplasm	315-324	FALSE	FALSE	FALSE	FALSE	FALSE	FALSE	FALSE	FALSE	Golgi apparatus	N/A	cellular protein localization
Tb927.10.6400	Q38AV5	chaperonin HSP60, mitochondrial precursor	HSP60	0.0917305	0.935024	0.159242	0.248501	0.969764	0.104505	0.146389	0.305395	0.835	0.0343	-0.613	-0.555	-0.0178	-0.8	0.777	0.538	HSP60	OG5_126788	mitochondrion(25%), kinetoplast(25%)	Mitochondrion	539-562	FALSE	TRUE	FALSE	FALSE	FALSE	FALSE	FALSE	FALSE	cilium	unfolded protein binding	protein folding
Tb927.10.6880	Q38AR9	glyceraldehyde 3-phosphate dehydrogenase, cytosolic	GAP	0.0205138	0.0704065	0.0457263	0.71595	0.395321	0.406004	0.804333	0.651606	0.9	0.604	-0.677	0.128	0.303	-0.296	0.0956	0.175	GAP	OG5_126628	cytoplasm(25%), flagellar cytoplasm(25%)	Cytoplasm	ND	FALSE	FALSE	FALSE	FALSE	FALSE	FALSE	FALSE	FALSE	cytoplasm	glyceraldehyde-3-phosphate dehydrogenase (NAD+) (phosphorylating) activity	glycolytic process
Tb927.10.7090	Q38AQ4	Alternative oxidase, mitochondrial	AOX	0.664949	0.75793	0.231821	0.292135	0.584057	0.481216	0.677303	0.633516	-0.302	0.192	-0.763	-0.747	-0.383	0.494	-0.318	0.364	AOX	OG5_130283	cytoplasm(points), flagellar cytoplasm	Mitochondrion	ND	FALSE	FALSE	FALSE	FALSE	FALSE	FALSE	FALSE	FALSE	cytoplasm	alternative oxidase activity	alternative respiration
Tb927.10.7340	Q38AM9	40S ribosomal protein S24E, putative	NA	0.0105973	0.184517	0.125177	0.702761	0.891144	0.112384	0.335147	0.636689	-1.45	-0.615	0.718	-0.192	0.0687	0.834	-0.538	0.261	Tb927.10.7340	OG5_126896	cytoplasm(patchy)	Cytoplasm	ND	FALSE	FALSE	FALSE	FALSE	FALSE	FALSE	FALSE	FALSE	cytoplasm	structural constituent of ribosome	translation
Tb927.10.7510	Q38AL3	chromatin binding protein, putative	NA	0.0415977	0.00199589	0.130567	0.343101	0.0275688	0.274828	0.125165	0.199762	-1.47	-2.22	0.943	0.644	1.61	-0.746	-1.17	0.968	Tb927.10.7510	OG5_149082	axoneme, cytoplasm	Cytoplasm	186-195	FALSE	FALSE	FALSE	FALSE	FALSE	FALSE	FALSE	FALSE	axoneme	chromatin binding	chromosome organization
Tb927.10.7570	Q38AK7	dihydrolipoamide acetyltransferase E2 subunit, putative	PDH-E2	0.110864	0.191703	0.88608	0.574162	0.378582	0.010887	0.0451161	0.765114	-0.914	0.659	-0.0701	0.309	0.488	1.57	-1.29	0.179	PDH-E2	OG5_128029	mitochondrion, kinetoplast(strong, cell cycle dependent)	Mitochondrion	183-212	FALSE	FALSE	FALSE	FALSE	FALSE	FALSE	FALSE	FALSE	ciliary basal body	dihydrolipoyllysine-residue acetyltransferase activity	acetyl-CoA biosynthetic process from pyruvate
Tb927.10.7690	Q38AJ5	Component of motile flagella 4	CMF4	0.987658	0.480507	0.84114	0.195924	0.261953	0.537245	0.307843	0.865591	0.0119	0.492	0.139	1.03	0.886	0.48	-0.879	-0.143	CMF4	OG5_147004	axoneme, cytoplasm(points, weak)	Cytoplasm	ND	FALSE	FALSE	FALSE	FALSE	FALSE	FALSE	FALSE	FALSE	axoneme	alpha-tubulin binding	cilium-dependent cell motility
Tb927.10.7880	Q38AH6	Sperm tail/Sperm tail C-terminal domain containing protein, putative	NA	0.0404512	0.119625	0.270593	0.82941	0.279841	0.00215482	0.20708	0.422879	0.785	-0.516	-0.357	-0.0764	-0.391	-1.3	0.504	-0.315	Tb927.10.7880	OG5_130359	ND	Nucleus	ND	FALSE	FALSE	FALSE	FALSE	FALSE	FALSE	FALSE	FALSE	axoneme	N/A	axonemal dynein complex assembly
Tb927.10.8230	Q38AE1	protein disulfide isomerase 2	PDI2	0.619692	0.444425	0.0439912	0.00752455	0.101622	0.84723	0.155727	0.234221	0.383	0.532	-1.49	-2.35	-1.32	0.148	1.24	1.03	PDI2	OG5_126843	endocytic, cytoplasm	Endoplasmic_reticulum	468-491	FALSE	FALSE	FALSE	FALSE	FALSE	FALSE	FALSE	FALSE	cytoplasm	protein disulfide isomerase activity	protein folding
Tb927.10.8780	Q38A96	AAA domain containing protein, putative	NA	0.23555	0.246082	0.279406	0.05377	0.063595	0.0356185	0.0509127	0.935052	-0.521	0.455	0.423	0.884	0.846	0.976	-0.982	-0.0382	Tb927.10.8780	OG5_131795	axoneme	Nucleus	404-423;519-538;867-897;1052-1083;1241-1289;1680-1691	FALSE	FALSE	FALSE	FALSE	FALSE	FALSE	FALSE	FALSE	axoneme	adenylate kinase activity	nucleoside diphosphate phosphorylation
Tb927.10.8940	Q38A80	flagellum targeting protein kharon1, putative	KH1	0.0368766	0.645322	0.518982	0.65024	0.753893	0.0804484	0.00825271	0.897579	1.41	0.258	0.362	-0.284	-0.196	-1.15	2.06	0.0879	KH1	OG5_149130	cortical cytoskeleton	Nucleus	19-34;259-268	FALSE	FALSE	FALSE	FALSE	FALSE	FALSE	FALSE	FALSE	ciliary pocket	mRNA binding	protein targeting
Tb927.10.8960	Q38A78	hypothetical protein, conserved	NA	0.12794	0.301643	0.937108	0.0900481	0.130367	0.521254	0.806018	0.848359	-1.07	-0.636	0.0476	-1.21	-1.06	0.436	0.182	0.141	Tb927.10.8960	OG5_147105	ND	Mitochondrion	68-81	FALSE	FALSE	FALSE	FALSE	FALSE	FALSE	FALSE	FALSE	antipodal site	N/A	N/A
Tb927.10.8980	Q38A76	hypothetical protein, conserved	NA	0.00497549	0.853337	0.014133	0.645302	0.121622	0.003549	0.755849	0.0734934	-1.02	0.0516	0.766	-0.144	0.504	1.07	-0.106	0.648	Tb927.10.8980	OG5_167671	kinetoplast(strong), mitochondrion	Mitochondrion	ND	FALSE	FALSE	FALSE	FALSE	FALSE	FALSE	FALSE	FALSE	cytoplasm	N/A	N/A
Tb927.10.9570	Q38A18	paraflagellar rod component, putative	PFC14	0.729985	0.458327	0.752023	0.58112	0.434746	0.318445	0.289649	0.231734	0.424	-0.821	0.347	-0.68	0.968	-1.25	1.45	1.65	PFC14	OG5_144030	ND	Cytoplasm	ND	FALSE	FALSE	FALSE	FALSE	FALSE	FALSE	FALSE	FALSE	paraflagellar rod	N/A	N/A
Tb927.10.9780	Q389Z8	ATP-dependent DEAD/H RNA helicase, putative	NA	0.0635832	0.966186	0.33741	0.524954	0.662925	0.0592254	0.127026	0.853065	-1.22	0.0234	0.539	0.396	0.27	1.24	-1.08	-0.125	Tb927.10.9780	OG5_128047	nucleolus	Nucleus	273-319;785-795	FALSE	FALSE	FALSE	FALSE	FALSE	FALSE	FALSE	FALSE	nucleolus	ATP binding	nucleobase-containing compound metabolic process
Tb927.10.9880	P50885	60S ribosomal protein L18, putative	TbL18LP	0.0388538	0.343631	0.422507	0.403626	0.324683	0.00693938	0.0457804	0.886381	-0.985	0.379	0.32	0.373	0.442	1.36	-1.04	0.069	TbL18LP	OG5_127236	ND	Cytoplasm	ND	FALSE	FALSE	FALSE	FALSE	FALSE	FALSE	FALSE	FALSE	cytoplasm	RNA binding	translation
Tb927.11.10200	Q383Q9	hypothetical protein, conserved	NA	0.478218	0.493291	0.733328	0.893349	0.388613	0.922206	0.301032	0.364665	-0.192	-0.166	-0.082	0.036	-0.235	0.0262	-0.31	-0.271	Tb927.11.10200	OG5_148154	ND	Nucleus	52-217;318-327	FALSE	FALSE	FALSE	FALSE	FALSE	FALSE	FALSE	FALSE	paraflagellar rod	N/A	N/A
Tb927.11.10350	Q383P4	hypothetical protein, conserved	NA	0.0653679	0.242165	0.00508298	0.0210714	0.0165553	0.380637	0.158371	0.912368	-0.921	-0.504	1.36	1.2	1.25	0.418	-0.753	0.0566	Tb927.11.10350	OG5_131181	axoneme, endocytic	Nucleus	ND	FALSE	FALSE	FALSE	FALSE	FALSE	FALSE	FALSE	FALSE	axoneme	N/A	N/A
Tb927.11.10430	Q383N6	hypothetical protein, conserved	NA	0.047971	0.859034	0.842392	0.703168	0.0990959	0.0647458	0.0478704	0.229467	-1.1	-0.0823	0.0922	0.198	0.898	1.02	-1.21	0.7	Tb927.11.10430	OG5_142530	ND	Cytoplasm	348-401;407-417;492-532	FALSE	FALSE	FALSE	FALSE	FALSE	FALSE	FALSE	FALSE	axoneme	N/A	cilium organization
Tb927.11.10490	Q383N0	hypothetical protein, conserved	NA	0.00496425	0.0694565	0.90542	0.240922	0.236204	0.140141	0.00115709	0.990705	-1.37	-0.727	0.0448	0.506	0.512	0.647	-1.83	0.00538	Tb927.11.10490	OG5_174149	hook complex	Nucleus	259-270;374-385;401-492	FALSE	FALSE	FALSE	FALSE	FALSE	FALSE	FALSE	FALSE	bilobe structure	N/A	N/A
Tb927.11.10540	Q383M5	hypothetical protein, conserved	NA	0.611064	0.146109	0.0356399	0.946487	0.158786	0.406689	0.160086	0.177155	-0.543	-1.43	2.17	-0.0713	1.55	-0.892	1.69	1.62	Tb927.11.10540	OG5_140392	ND	Cytoplasm	6-54	FALSE	FALSE	FALSE	FALSE	FALSE	FALSE	FALSE	FALSE	paraflagellar rod	N/A	N/A
Tb927.11.10790	Q383K0	40S ribosomal protein SA, putative	NA	0.0154707	0.339613	0.530768	0.793019	0.447819	0.0828962	0.103289	0.354691	-1.47	-0.474	0.308	-0.143	0.418	1	-1.02	0.562	Tb927.11.10790	OG5_127014	cytoplasm(patchy)	Cytoplasm	ND	FALSE	FALSE	FALSE	FALSE	FALSE	FALSE	FALSE	FALSE	cytoplasm	mRNA binding	cytoplasmic translation
Tb927.11.1100	Q387E0	cysteine peptidase, Clan CA, family C2, putative	NA	0.522779	0.948095	0.994906	0.768421	0.623249	0.486483	0.400421	0.856295	-0.447	0.0404	0.00396	0.205	0.342	0.487	-0.648	0.138	Tb927.11.1100	OG5_130635	ND	Golgi_apparatus	ND	FALSE	FALSE	FALSE	FALSE	FALSE	FALSE	FALSE	FALSE	cilium	calcium-dependent cysteine-type endopeptidase activity	proteolysis
Tb927.11.11010	Q383H7	hypothetical protein, conserved	NA	0.0133705	0.153883	0.956173	0.578805	0.0114067	0.161873	0.0634859	0.0509697	1.36	0.648	-0.0241	0.273	1.4	-0.71	1.06	1.12	Tb927.11.11010	OG5_149106	ND	Nucleus	ND	FALSE	FALSE	FALSE	FALSE	FALSE	FALSE	FALSE	FALSE	axoneme	phosphate ion binding	N/A
Tb927.11.11210	Q383F7	paraflagellar rod component, putative	PFC17	0.202569	0.0632303	0.271107	0.351907	0.153278	0.648298	0.263906	0.625759	-0.905	-1.22	0.694	0.652	1.02	-0.316	-0.863	0.37	PFC17	OG5_148836	ND	Nucleus	ND	FALSE	FALSE	FALSE	FALSE	FALSE	FALSE	FALSE	FALSE	paraflagellar rod	N/A	N/A
Tb927.11.11230	Q583T1	NA	NA	0.845898	0.309526	0.881999	0.961552	0.159162	0.272899	0.732297	0.210466	0.0775	-0.369	0.0529	-0.0192	-0.582	-0.447	0.15	-0.563	Tb927.11.11230	OG5_127132	ND	Mitochondrion	144-153;158-189	FALSE	FALSE	FALSE	FALSE	FALSE	FALSE	FALSE	FALSE	cytoplasm	RNA binding	ribosomal large subunit biogenesis
Tb927.11.11550	Q383C4	DNA topoisomerase II alpha, putative	TOP2A	0.436699	0.89788	0.102352	0.144666	0.0741419	0.505315	0.486799	0.731249	-0.392	-0.0572	0.765	0.756	0.944	0.335	-0.383	0.188	TOP2A	OG5_127113	ND	Nucleus	1250-1289;1359-1368;1417-1455	FALSE	FALSE	FALSE	FALSE	FALSE	FALSE	FALSE	FALSE	ciliary plasm	N/A	N/A
Tb927.11.1160	Q387D6	Region in Clathrin and VPS, putative	NA	0.112995	0.854776	0.229826	0.644647	0.382401	0.149851	0.359197	0.230397	-1.03	-0.102	0.686	0.288	-0.551	0.931	-0.635	-0.84	Tb927.11.1160	OG5_128477	ND	Cytoplasm	ND	FALSE	FALSE	FALSE	FALSE	FALSE	FALSE	FALSE	FALSE	transport vesicle	N/A	N/A
Tb927.11.11820	Q382Z8	40S ribosomal protein S17, putative	NA	0.194338	0.794651	0.996114	0.455253	0.850512	0.131694	0.59853	0.607304	-0.385	0.0671	0.00125	-0.217	-0.0543	0.452	-0.167	0.163	Tb927.11.11820	OG5_126867	cytoplasm(patchy)	Cytoplasm	ND	FALSE	FALSE	FALSE	FALSE	FALSE	FALSE	FALSE	FALSE	cytoplasm	structural constituent of ribosome	translation
Tb927.11.11920	Q382Y9	molybdenum cofactor biosynthesis protein, putative	NA	0.433059	0.89293	0.321025	0.782012	0.209444	0.50482	0.723842	0.166688	-0.458	-0.0696	0.522	-0.16	0.747	0.389	0.224	0.907	Tb927.11.11920	OG5_150516	ND	Nucleus	10-20;90-109;416-425	FALSE	FALSE	FALSE	FALSE	FALSE	FALSE	TRUE	FALSE	antipodal site	N/A	N/A
Tb927.11.12150	Q382W6	flagellar pocket cytoskeletal protein bilbo1	BILBO1	0.0034331	0.462672	0.00348077	0.354783	0.633483	0.0132557	0.604256	0.208307	1.61	0.311	-1.44	0.44	-0.224	-1.3	-0.267	-0.665	BILBO1	OG5_146304	ND	Cytoplasm	332-363;401-421	FALSE	FALSE	FALSE	FALSE	FALSE	FALSE	FALSE	FALSE	ciliary pocket collar	protein binding	cilium organization
Tb927.11.13030	Q382N3	calmodulin	NA	0.747855	0.499439	0.436414	0.446968	0.0115717	0.359111	0.814438	0.0738903	0.161	-0.305	0.352	0.385	1.42	-0.466	0.129	1.04	Tb927.11.13030	OG5_126800	ND	Cytoplasm	ND	FALSE	FALSE	FALSE	FALSE	FALSE	FALSE	FALSE	FALSE	cilium	calcium ion binding	calcium-mediated signaling
Tb927.11.13230	Q382L3	VAMP-associated protein, putative	VAP	0.0594934	0.522947	0.770812	0.0180487	0.322782	0.165521	0.748905	0.154703	-1.25	-0.357	-0.162	-1.63	-0.624	0.89	0.218	1	VAP	OG5_146310	flagellar pocket, flagellum attachment zone	Cell_membrane	ND	FALSE	FALSE	FALSE	FALSE	FALSE	FALSE	FALSE	FALSE	ciliary pocket	N/A	endoplasmic reticulum membrane organization
Tb927.11.13250	Q382L1	eukaryotic translation initiation factor 2 gamma, putative	eIF-2-gamma	0.0128271	0.0326901	0.788466	0.181384	0.0500776	0.000198502	0.0025257	0.512947	-1.36	1.01	0.117	0.671	1.02	2.37	-1.91	0.351	eIF-2-gamma	OG5_127447	cytoplasm(patchy)	Peroxisome	ND	FALSE	TRUE	FALSE	FALSE	FALSE	FALSE	FALSE	FALSE	cytoplasm	GTP binding	formation of translation preinitiation complex
Tb927.11.13360	Q382K0	AAA ATPase, putative	NA	0.465573	0.160501	0.00208807	0.894627	0.548819	0.574681	0.0403848	0.668296	-0.433	-0.764	1.94	0.0778	0.354	-0.331	1.42	0.277	Tb927.11.13360	OG5_140300	nucleoplasm	Cytoplasm	449-464	FALSE	FALSE	FALSE	FALSE	FALSE	FALSE	FALSE	FALSE	nucleoplasm	ATP hydrolysis activity	protein metabolic process
Tb927.11.13460	Q382J1	hypothetical protein, conserved	NA	0.462748	0.252283	0.829658	0.140512	0.239974	0.0895098	0.58626	0.764565	0.228	-0.323	0.0592	0.472	0.371	-0.551	-0.184	-0.101	Tb927.11.13460	OG5_156146	ND	Nucleus	205-214	FALSE	FALSE	FALSE	FALSE	FALSE	FALSE	FALSE	FALSE	axoneme	N/A	N/A
Tb927.11.13500	Q382I7	par1	NA	0.362422	0.750905	0.441185	0.382841	0.165892	0.238461	0.505051	0.617149	0.724	-0.223	0.545	0.693	1.12	-0.947	0.576	0.431	Tb927.11.13500	OG5_148326	paraflagellar rod	Cytoplasm	ND	FALSE	FALSE	FALSE	FALSE	FALSE	FALSE	FALSE	FALSE	motile cilium	N/A	cilium organization
Tb927.11.14020	Q382D5	nuclear RNA binding domain 2	NRBD2	0.0439684	0.463039	0.193663	0.17638	0.405144	0.146677	0.0446166	0.614162	-0.964	-0.294	0.532	0.621	0.374	0.67	-1.05	-0.246	NRBD2	OG5_146061	cytoplasm(patchy)	Nucleus	1-85;247-279	FALSE	FALSE	FALSE	FALSE	FALSE	FALSE	FALSE	FALSE	cytoplasm	RNA binding	RNA processing
Tb927.11.14120	Q382C5	phenylalanyl-tRNA synthetase alpha chain, putative	NA	0.322091	0.629291	0.268334	0.220865	0.256305	0.568016	0.260077	0.0408531	0.639	0.275	-0.642	0.798	-0.737	-0.364	-0.8	-1.53	Tb927.11.14120	OG5_127036	cytoplasm	Cytoplasm	ND	FALSE	FALSE	FALSE	FALSE	FALSE	FALSE	FALSE	FALSE	cytoplasm	phenylalanine-tRNA ligase activity	phenylalanyl-tRNA aminoacylation
Tb927.11.1430	Q387A9	Component of motile flagella 2	CMF2	0.694413	0.724471	0.274081	0.52495	0.582082	0.481666	0.495296	0.936685	0.304	-0.244	0.771	0.494	0.427	-0.547	0.581	-0.0671	CMF2	OG5_128450	axoneme	Cytoplasm	ND	FALSE	FALSE	FALSE	FALSE	FALSE	FALSE	FALSE	FALSE	axoneme	alpha-tubulin binding	cilium-dependent cell motility
Tb927.11.15000	Q381T5	survival of motor neuron (SMN)-like protein	TbSMN	0.0896351	0.781531	0.0644943	0.121012	0.541839	0.0566588	0.147462	0.365525	-1.67	0.232	1.64	1.51	0.573	1.9	-1.54	-0.939	TbSMN	OG5_154672	ND	Nucleus	ND	FALSE	FALSE	FALSE	FALSE	FALSE	FALSE	FALSE	FALSE	nucleolus	protein binding	RNA splicing
Tb927.11.15140	Q381S1	Cytoskeleton-associated protein 62 kDa	CAP62	0.866025	0.643384	0.0899174	0.683242	0.917649	0.561278	0.0622901	0.780386	0.0618	-0.152	0.585	-0.15	-0.0379	-0.214	0.797	0.112	CAP62	OG5_173523	ND	Cytoplasm	87-98	TRUE	TRUE	FALSE	FALSE	FALSE	TRUE	FALSE	FALSE	bilobe structure	protein-containing complex binding	N/A
Tb927.11.15480	Q381N7	heat shock protein Hsp20, putative	ACDP	0.667788	0.107423	0.307654	0.311353	0.500423	0.0679669	0.0429348	0.748408	-0.281	0.984	-0.606	0.672	0.443	1.26	-1.56	-0.229	ACDP	OG5_147283	cytoplasm, flagellar cytoplasm, nuclear lumen	Nucleus	ND	FALSE	FALSE	FALSE	FALSE	FALSE	FALSE	FALSE	FALSE	ciliary plasm	N/A	response to heat
Tb927.11.15880	Q381J6	60S ribosomal protein L27, putative	NA	0.0207694	0.725889	0.176318	0.400601	0.17746	0.0110357	0.0646949	0.621845	-0.898	0.111	0.44	0.299	0.49	1.01	-0.758	0.191	Tb927.11.15880	OG5_127262	nucleolus, cytoplasm	Cytoplasm	ND	FALSE	FALSE	FALSE	FALSE	FALSE	FALSE	FALSE	FALSE	cytoplasm	structural constituent of ribosome	translation
Tb927.11.16020	Q381I4	RNA-binding protein, putative	DRBD10	0.0187638	0.101561	0.0087762	0.00547569	0.0213237	0.295774	0.0108556	0.542499	-1.72	-1.01	1.76	2.12	1.67	0.703	-2.08	-0.442	DRBD10	OG5_128178	nucleolus(strong)	Nucleus	17-36	FALSE	FALSE	FALSE	FALSE	FALSE	FALSE	TRUE	FALSE	nucleolus	RNA binding	RNA processing
Tb927.11.16280	Q57W56	60S ribosomal protein L8, putative	NA	0.336702	0.0476228	0.00117093	0.210954	0.206481	0.360865	0.00288974	0.990201	-0.343	-0.669	1.25	-0.452	-0.457	-0.326	1.36	-0.00472	Tb927.11.16280	OG5_126641	ND	Cytoplasm	ND	FALSE	FALSE	FALSE	FALSE	FALSE	FALSE	FALSE	FALSE	cytosolic large ribosomal subunit	RNA binding	cytoplasmic translation
Tb927.11.16400	Q381E6	kinetoplast-associated protein 3, putative	KAP3	0.227481	0.125879	0.068395	0.413158	0.106312	0.0165223	0.760144	0.43449	-0.515	0.593	0.719	0.344	0.703	1.11	-0.139	0.359	KAP3	OG5_154711	cytoplasm(points)	Mitochondrion	115-124	FALSE	FALSE	FALSE	FALSE	FALSE	TRUE	FALSE	FALSE	cytoplasm	DNA binding	DNA packaging
Tb927.11.16760	Q381B0	T-complex protein 1, alpha subunit, putative	TCP-1-alpha	0.161379	0.911054	0.0832845	0.458553	0.0618573	0.136288	0.00302727	0.0230709	-0.512	0.0353	-0.577	0.264	-0.702	0.547	-1.35	-0.967	TCP-1-alpha	OG5_127998	cytoplasm	Cytoplasm	ND	FALSE	TRUE	FALSE	FALSE	FALSE	FALSE	FALSE	FALSE	chaperonin-containing T-complex	unfolded protein binding	protein folding
Tb927.11.16890	Q380Z7	Tetratricopeptide-like helical domain containing protein	FLAM7	0.245175	0.305545	0.767201	0.563003	0.723784	0.797444	0.182683	0.835472	-1.51	-1.18	0.336	0.737	0.449	0.325	-1.91	-0.288	FLAM7	OG5_145135	axoneme(25%), cytoplasm(points)	Cytoplasm	334-355;941-951;1006-1041	FALSE	FALSE	FALSE	FALSE	FALSE	FALSE	FALSE	FALSE	cytoplasm	N/A	N/A
Tb927.11.1700	Q386Y4	hypothetical protein, conserved	NA	0.0908595	0.243428	0.643674	0.264191	0.177157	0.0114172	0.343326	0.0331998	-1	0.603	-0.234	-0.644	0.787	1.61	-0.595	1.43	Tb927.11.1700	OG5_133023	kinetoplast	Mitochondrion	189-200;341-570	FALSE	FALSE	FALSE	FALSE	FALSE	FALSE	FALSE	FALSE	kinetoplast	N/A	N/A
Tb927.11.17000	Q380Y7	AIR9-like protein	AIR9	0.0849324	0.453929	0.868734	0.931386	0.911357	0.264035	0.102047	0.981619	0.623	0.232	0.0506	0.0295	0.0381	-0.391	0.644	0.00864	AIR9	OG5_137075	ND	Cytoplasm	842-985	FALSE	FALSE	FALSE	FALSE	FALSE	FALSE	FALSE	FALSE	cortical cytoskeleton	N/A	cytokinesis
Tb927.11.1960	Q386W3	leucine-rich repeat protein (LRRP), putative	NA	0.690503	0.160937	0.204562	0.25448	0.154425	0.10537	0.71728	0.776791	0.23	-0.75	-0.674	-0.673	-0.853	-0.98	0.229	-0.179	Tb927.11.1960	OG5_130300	ND	Cytoplasm	ND	FALSE	FALSE	FALSE	FALSE	FALSE	FALSE	FALSE	FALSE	axoneme	N/A	N/A
Tb927.11.1980	Q386W1	zinc finger protein family member, putative	ZC3H41	0.0387354	0.233968	0.281767	0.143113	0.129555	0.00431276	0.0215842	0.957696	-1.28	0.624	0.562	0.87	0.903	1.9	-1.59	0.0332	ZC3H41	OG5_151717	cytoplasm(points, patchy), nucleoplasm(points)	Cytoplasm	81-122	FALSE	TRUE	FALSE	FALSE	FALSE	FALSE	FALSE	FALSE	P granule	RNA binding	N/A
Tb927.11.2060	Q386V3	60S acidic ribosomal protein P0, putative	NA	0.186776	0.868652	0.20415	0.528612	0.299012	0.236335	0.454401	0.699205	-0.617	-0.067	0.53	0.287	0.48	0.55	-0.375	0.192	Tb927.11.2060	OG5_127051	ND	Cytoplasm	261-324	FALSE	FALSE	FALSE	FALSE	FALSE	FALSE	FALSE	FALSE	cytoplasm	large ribosomal subunit rRNA binding	cytoplasmic translation
Tb927.11.2120	Q386U7	Nucleolar complex protein 1, putative	NOC1	0.0670842	0.642657	0.902136	0.479138	0.171192	0.0302233	0.0217695	0.524806	-1.14	0.243	-0.0643	0.417	0.827	1.38	-1.62	0.41	NOC1	OG5_128699	nucleolus	Nucleus	643-667;704-727	FALSE	FALSE	FALSE	FALSE	FALSE	FALSE	FALSE	FALSE	cytoplasm	N/A	N/A
Tb927.11.2400	Q386R9	Flabarin-like protein	NA	0.072683	0.978909	0.412217	0.0305948	0.199252	0.0695749	0.284868	0.00404923	-0.973	0.0121	0.379	-1.2	0.676	0.985	0.611	1.88	Tb927.11.2400	OG5_185161	pellicular membrane(75%), flagellar membrane(75%, strong)	Cell_membrane	ND	FALSE	FALSE	FALSE	FALSE	FALSE	FALSE	FALSE	FALSE	ciliary membrane	N/A	N/A
Tb927.11.2540	Q386Q6	hypothetical protein, conserved	NA	0.00204994	0.000847928	0.131149	0.0324976	0.022963	0.998821	0.970367	0.872248	-1.49	-1.49	0.567	-0.937	-1.01	-0.000595	0.0164	-0.071	Tb927.11.2540	OG5_129554	axoneme, cytoplasm(weak), nucleoplasm(weak)	Plastid	ND	FALSE	FALSE	FALSE	FALSE	FALSE	FALSE	FALSE	FALSE	axoneme	N/A	axoneme assembly
Tb927.11.2610	Q386P9	Cytoskeleton-associated protein 50 kDa	CAP50	0.133581	0.693651	0.339973	0.0323518	0.366462	0.238174	0.0136978	0.210066	0.423	0.0955	-0.235	-0.63	-0.248	-0.327	0.818	0.382	CAP50	OG5_150756	ND	Cytoplasm	306-461	FALSE	FALSE	FALSE	FALSE	FALSE	FALSE	FALSE	FALSE	cortical cytoskeleton	N/A	cellular protein localization
Tb927.11.2650	Q386P5	heat shock protein 84, putative	NA	0.00163919	0.274442	0.615532	0.843518	0.66239	0.0125309	0.00516102	0.564078	2.28	0.597	-0.27	-0.118	0.262	-1.68	2.12	0.38	Tb927.11.2650	OG5_129844	kinetoplast(strong, 75%), mitochondrion(75%)	Mitochondrion	ND	FALSE	TRUE	FALSE	FALSE	FALSE	FALSE	FALSE	FALSE	kinetoplast	ATP hydrolysis activity	protein folding
Tb927.11.3120	Q9U6A9	NA	NA	0.00821854	0.971053	0.00598537	0.0155264	0.0345447	0.0076928	0.0179318	0.713438	-1.29	0.0139	1.21	1.15	0.98	1.3	-1.23	-0.172	Tb927.11.3120	OG5_127411	nucleolus(75%)	Nucleus	455-474	FALSE	FALSE	FALSE	FALSE	FALSE	FALSE	FALSE	FALSE	nucleolus	GTP binding	ribosome biogenesis
Tb927.11.3240	Q386I7	T-complex protein 1, zeta subunit, putative	TCP-1-zeta	0.634889	0.585466	0.731293	0.277417	0.340412	0.341343	0.254287	0.897999	-0.183	0.188	0.118	0.425	0.371	0.371	-0.49	-0.0538	TCP-1-zeta	OG5_127428	ND	Cytoplasm	ND	FALSE	TRUE	FALSE	FALSE	FALSE	FALSE	FALSE	FALSE	chaperonin-containing T-complex	unfolded protein binding	protein folding
Tb927.11.3290	Q386I2	Tripartite attachment complex protein 166	p166	0.0541831	0.18755	0.317232	0.585547	0.0325056	0.404139	0.136443	0.0180261	1.45	0.856	-0.641	-0.386	1.64	-0.594	1.19	2.02	p166	OG5_145109	basal body	Golgi_apparatus	543-552;621-641;989-998;1385-1394	FALSE	FALSE	FALSE	FALSE	FALSE	FALSE	TRUE	FALSE	kinetoplast	N/A	mitochondrial genome maintenance
Tb927.11.3360	Q386H5	Component of motile flagella 22	CMF22	0.013474	0.215444	0.676198	0.889091	0.335827	0.00132711	0.054468	0.316161	1.42	-0.583	-0.192	0.0714	-0.501	-2	1.15	-0.572	CMF22	OG5_129551	axoneme	Nucleus	497-520	FALSE	FALSE	FALSE	FALSE	FALSE	TRUE	FALSE	FALSE	axoneme	N/A	cell motility
Tb927.11.3490	Q386G2	hypothetical protein, conserved	NA	0.45173	0.918788	0.0615133	0.2823	0.508942	0.506843	0.200193	0.693959	0.331	0.0397	0.776	0.477	0.289	-0.291	0.629	-0.188	Tb927.11.3490	OG5_150650	ND	Cytoplasm	ND	TRUE	TRUE	FALSE	FALSE	FALSE	FALSE	FALSE	FALSE	cytoplasm	mRNA binding	N/A
Tb927.11.3590	Q386F2	40S ribosomal protein S4, putative	NA	0.7477	0.490829	0.717885	0.343171	0.0413569	0.765086	0.384816	0.26849	-0.0942	-0.182	0.0947	-0.282	-0.644	-0.0875	0.282	-0.362	Tb927.11.3590	OG5_126890	ND	Cytoplasm	ND	FALSE	FALSE	FALSE	FALSE	FALSE	FALSE	FALSE	FALSE	cytoplasm	RNA binding	translation
Tb927.11.3830	Q386D1	hypothetical protein, conserved	NA	0.147254	0.0307141	0.583269	0.0756212	0.228177	0.550236	0.0173762	0.0114898	-0.685	-0.959	0.225	0.857	-0.563	-0.274	-1.32	-1.42	Tb927.11.3830	OG5_145899	nucleolus	Nucleus	ND	FALSE	TRUE	FALSE	FALSE	FALSE	FALSE	FALSE	FALSE	nucleolus	N/A	N/A
Tb927.11.3840	Q386D0	hypothetical protein, conserved	NA	0.583386	0.00652697	0.954527	0.628171	0.635262	0.00415326	0.989753	0.992648	-0.159	0.808	0.0147	-0.141	-0.138	0.967	-0.00407	0.00292	Tb927.11.3840	OG5_147015	ND	Nucleus	61-91;196-205;259-279	FALSE	FALSE	FALSE	FALSE	FALSE	FALSE	FALSE	FALSE	nucleolus	N/A	N/A
Tb927.11.4030	Q386B1	hypothetical protein, conserved	NA	0.00165902	0.931501	0.418468	0.881903	0.0170182	0.00142003	0.0166858	0.0206012	-1.64	0.0332	0.316	-0.0641	1.14	1.67	-1.26	1.21	Tb927.11.4030	OG5_148386	flagellum(cell cycle dependent), cytoplasm	Cytoplasm	780-789;1028-1037;1102-1113	TRUE	FALSE	FALSE	FALSE	FALSE	FALSE	TRUE	FALSE	cilium	N/A	N/A
Tb927.11.4200	Q385Z7	mannose-specific lectin, putative	NA	0.140189	0.214124	0.183022	0.138283	0.281401	0.695795	0.274983	0.686931	0.54	0.402	0.433	0.543	0.387	-0.138	0.43	-0.156	Tb927.11.4200	OG5_132555	ND	Endoplasmic_reticulum	358-413;470-545	FALSE	FALSE	FALSE	FALSE	FALSE	FALSE	FALSE	FALSE	COPII-coated ER to Golgi transport vesicle	mannose binding	Golgi organization
Tb927.11.4610	Q385V6	protein kinase A regulatory subunit	PKA-R	0.0828843	0.520362	0.736022	0.877697	0.17584	0.222515	0.0514002	0.266179	-0.882	-0.279	-0.146	0.0741	0.674	0.604	-1.1	0.6	PKA-R	OG5_126950	paraflagellar rod	Cytoplasm	ND	FALSE	FALSE	TRUE	FALSE	FALSE	FALSE	FALSE	FALSE	cAMP-dependent protein kinase complex	cAMP-dependent protein kinase regulator activity	cilium movement involved in cell motility
Tb927.11.4740	Q385U3	paraflagellar rod component, putative	PFC12	0.929057	0.384416	0.375414	0.237383	0.359836	0.487939	0.651379	0.796925	-0.0321	-0.284	0.29	0.437	0.335	-0.252	-0.179	-0.102	PFC12	OG5_148370	axoneme, cytoplasm(points)	Cytoplasm	ND	FALSE	FALSE	FALSE	FALSE	FALSE	FALSE	FALSE	FALSE	cytoplasm	N/A	N/A
Tb927.11.4880	Q385T0	Calmodulin-binding, putative	NA	0.236302	0.676279	0.160333	0.473008	0.195951	0.406644	0.562977	0.580442	-0.9	-0.278	0.965	0.537	0.988	0.623	-0.472	0.451	Tb927.11.4880	OG5_130018	axoneme(50%)	Nucleus	ND	FALSE	FALSE	FALSE	FALSE	FALSE	FALSE	FALSE	FALSE	axoneme	calmodulin binding	N/A
Tb927.11.4920	Q385S6	hypothetical protein, conserved	NA	0.551436	0.356237	0.189764	0.144323	0.0281063	0.811646	0.790219	0.425377	0.312	0.436	0.63	0.79	1.25	0.124	0.152	0.46	Tb927.11.4920	OG5_148660	ND	Cytoplasm	ND	FALSE	FALSE	FALSE	FALSE	FALSE	FALSE	FALSE	FALSE	axoneme	N/A	N/A
Tb927.11.5520	Q385L6	triosephosphate isomerase	TIM	0.963402	0.375089	0.953687	0.282789	0.14098	0.401009	0.327794	0.692275	-0.0325	0.57	0.0368	0.777	1.09	0.603	-0.773	0.308	TIM	OG5_127002	cytoplasm(points)	Peroxisome	109-119;148-157	FALSE	FALSE	FALSE	FALSE	FALSE	FALSE	FALSE	FALSE	cytoplasm	triose-phosphate isomerase activity	gluconeogenesis
Tb927.11.5650	Q385K3	replication factor C, subunit 1, putative	NA	0.00932805	0.183313	0.00650438	0.180143	0.205304	0.1012	0.174551	0.0252846	-1.79	-0.744	1.69	0.838	-0.789	1.04	-0.93	-1.63	Tb927.11.5650	OG5_127465	nucleoplasm	Nucleus	505-571	FALSE	FALSE	FALSE	FALSE	FALSE	FALSE	FALSE	FALSE	DNA replication factor C complex	ATP binding	DNA replication
Tb927.11.6050	Q385G3	Flagellar-associated PapD-like, putative	NA	0.972332	0.160393	0.348542	0.764286	0.126617	0.194996	0.594419	0.248959	0.0212	-0.795	0.52	0.183	0.974	-0.816	0.358	0.79	Tb927.11.6050	OG5_148359	axoneme	Cytoplasm	69-81;143-166;283-312;649-727;1647-1675	FALSE	FALSE	FALSE	FALSE	FALSE	FALSE	FALSE	FALSE	axoneme	N/A	N/A
Tb927.11.6300	Q385D9	40S ribosomal protein S5, putative	NA	0.151567	0.446277	0.0190601	0.0151828	0.015875	0.428703	0.00522468	0.983861	-0.729	-0.337	1.14	-1.33	-1.32	0.392	1.73	0.0108	Tb927.11.6300	OG5_127064	nucleolus, cytoplasm	Cytoplasm	ND	FALSE	FALSE	FALSE	FALSE	FALSE	FALSE	FALSE	FALSE	cytoplasm	mRNA binding	ribosomal small subunit assembly
Tb927.11.6510	Q385B8	40S ribosomal protein S21, putative	NA	0.0921033	0.181271	0.469249	0.498478	0.118933	0.591794	0.126822	0.393253	-1.08	-0.748	-0.396	-0.414	-0.988	0.327	-1.06	-0.574	Tb927.11.6510	OG5_127484	ND	Nucleus	86-194	FALSE	FALSE	FALSE	FALSE	FALSE	FALSE	FALSE	FALSE	cytoplasm	structural constituent of ribosome	endonucleolytic cleavage in ITS1 to separate SSU-rRNA from 5.8S rRNA and LSU-rRNA from tricistronic rRNA transcript (SSU-rRNA, 5.8S rRNA, LSU-rRNA)
Tb927.11.6530	Q385B6	hypothetical protein, conserved	NA	0.503941	0.715137	0.900807	0.877402	0.357486	0.325343	0.710331	0.32866	-0.596	0.289	0.0986	-0.136	0.826	0.885	-0.361	0.963	Tb927.11.6530	OG5_145887	axoneme(75%), cytoplasm	Nucleus	264-273	FALSE	FALSE	FALSE	FALSE	FALSE	FALSE	FALSE	FALSE	axoneme	N/A	N/A
Tb927.11.6870	Q384Y3	14-3-3 protein 2	14-3-3-II	0.625549	0.687033	0.162642	0.839859	0.486315	0.897628	0.163372	0.649243	-0.384	-0.283	-1.01	-0.158	-0.55	0.101	-1.24	-0.391	14-3-3-II	OG5_126706	flagellar pocket(ring), cytoplasm	Cytoplasm	ND	FALSE	FALSE	FALSE	FALSE	FALSE	FALSE	FALSE	FALSE	ciliary plasm	protein binding	DNA damage checkpoint signaling
Tb927.11.7240	Q384U1	nexin-dynein regulatory complex 2	DCR2	0.132336	0.176448	0.0797605	0.450473	0.14809	0.0122005	0.541681	0.502728	0.589	-0.469	-0.622	-0.286	-0.564	-1.06	0.253	-0.278	DCR2	OG5_129935	axoneme(75%)	Cytoplasm	5-17;22-54	FALSE	FALSE	FALSE	FALSE	FALSE	FALSE	FALSE	FALSE	axonemal dynein complex	N/A	axonemal dynein complex assembly
Tb927.11.7350	Q867U7	NA	NA	0.0053963	0.749032	0.415143	0.0455532	0.236319	0.00300554	0.000696191	0.398071	-1.25	0.111	0.287	0.837	0.472	1.36	-1.8	-0.365	Tb927.11.7350	OG5_126572	nucleoplasm	Nucleus	5-25;27-37	FALSE	FALSE	FALSE	FALSE	FALSE	FALSE	FALSE	FALSE	nucleoplasm	DNA binding	DNA replication
Tb927.11.7380	Q384S7	glycerol-3-phosphate dehydrogenase (FAD-dependent), mitochondrial	G3PDH	0.988615	0.502658	0.257582	0.765422	0.929362	0.557533	0.496098	0.724125	-0.0118	-0.499	-0.855	-0.247	0.0731	-0.487	-0.62	0.32	G3PDH	OG5_127215	ND	Mitochondrion	72-81	FALSE	FALSE	FALSE	FALSE	FALSE	FALSE	FALSE	FALSE	cytoplasm	flavin adenine dinucleotide binding	glycerol catabolic process
Tb927.11.7410	Q384S4	MSP-A, putative	NA	0.870193	0.503766	0.661488	0.24255	0.415075	0.44821	0.124986	0.733907	-0.0417	0.154	-0.1	0.306	0.21	0.195	-0.448	-0.0952	Tb927.11.7410	OG5_126749	endoplasmic reticulum	Extracellular	ND	FALSE	FALSE	FALSE	FALSE	FALSE	FALSE	FALSE	FALSE	endoplasmic reticulum	metalloendopeptidase activity	cell adhesion
Tb927.11.7430	Q384S2	hypothetical protein, conserved	NA	0.548572	0.214372	0.279723	0.983911	0.921465	0.0969148	0.740467	0.942921	0.259	-0.49	-0.424	-0.00865	-0.0423	-0.749	-0.156	-0.0337	Tb927.11.7430	OG5_128120	cytoplasm, axoneme	Nucleus	10-19	FALSE	FALSE	FALSE	FALSE	FALSE	FALSE	FALSE	FALSE	axoneme	N/A	positive regulation of transcription elongation from RNA polymerase II promoter
Tb927.11.7460	Q384Q5	luminal binding protein 1 (BiP), putative	BiP	0.592804	0.269685	0.823837	0.0471371	0.533891	0.137341	0.0181465	0.182529	0.171	-0.321	0.0634	-0.679	-0.199	-0.492	0.914	0.48	BiP	OG5_126588	ND	Endoplasmic_reticulum	ND	FALSE	FALSE	FALSE	FALSE	FALSE	FALSE	FALSE	FALSE	cytoplasm	ATP binding	SRP-dependent cotranslational protein targeting to membrane
Tb927.11.7470	Q384Q9	hypothetical protein, conserved	NA	0.848524	0.292014	0.841098	0.712931	0.122581	0.445784	0.744873	0.266803	0.132	0.662	-0.123	0.254	1.11	0.53	-0.246	0.856	Tb927.11.7470	OG5_146013	ND	Nucleus	ND	FALSE	FALSE	FALSE	FALSE	FALSE	FALSE	FALSE	FALSE	axoneme	N/A	N/A
Tb927.11.7510	Q383E5	luminal binding protein 1 (BiP), putative	BiP	0.712537	0.893721	0.856543	0.180495	0.651612	0.802941	0.292657	0.401637	0.102	0.033	-0.0447	0.383	0.125	-0.0691	-0.325	-0.257	BiP	OG5_126588	ND	Endoplasmic_reticulum	ND	FALSE	FALSE	FALSE	FALSE	FALSE	FALSE	FALSE	FALSE	cytoplasm	ATP binding	SRP-dependent cotranslational protein targeting to membrane
Tb927.11.7590	Q384P7	Tripartite attachment complex associated protein 110	TAP110	0.89602	0.434671	0.732141	0.695929	0.449108	0.408272	0.843909	0.734089	0.0403	-0.218	-0.0947	-0.121	-0.236	-0.258	0.0666	-0.115	TAP110	OG5_157135	basal body	Nucleus	ND	FALSE	TRUE	FALSE	FALSE	FALSE	FALSE	TRUE	FALSE	cytoplasm	N/A	posttranscriptional regulation of gene expression
Tb927.11.8030	Q384L6	hypothetical protein, conserved	NA	0.458745	0.340228	0.887751	0.544597	0.962184	0.122006	0.27127	0.609303	-0.478	0.554	0.0807	0.39	0.0303	1.03	-0.787	-0.36	Tb927.11.8030	OG5_148815	axoneme	Cytoplasm	ND	FALSE	FALSE	FALSE	FALSE	FALSE	FALSE	FALSE	FALSE	axoneme	N/A	N/A
Tb927.11.8200	Q384J9	ribosomal protein S26, putative	NA	0.228954	0.51058	0.36385	0.981513	0.376207	0.523901	0.724095	0.429969	-0.772	-0.371	0.515	-0.0145	-0.561	0.401	-0.242	-0.546	Tb927.11.8200	OG5_127138	ND	Cytoplasm	ND	FALSE	FALSE	FALSE	FALSE	FALSE	FALSE	FALSE	FALSE	cytosolic small ribosomal subunit	mRNA binding	translation
Tb927.11.8300	Q384I9	hypothetical protein, conserved	NA	0.910738	0.130544	0.547808	0.160216	0.645441	0.143259	0.468044	0.37118	0.0871	-1.1	0.42	1.13	0.359	-1.18	-0.623	-0.772	Tb927.11.8300	OG5_161887	cytoplasm(patchy, points, weak), axoneme(50%)	Cytoplasm	ND	FALSE	FALSE	FALSE	FALSE	FALSE	FALSE	FALSE	FALSE	axoneme	N/A	N/A
Tb927.11.8950	Q384D3	leucine rich repeat	LRRP1	0.142097	0.814018	0.00107164	0.572629	0.00440219	0.0983807	0.185718	0.0225756	0.607	-0.0838	-1.43	-0.226	-1.32	-0.691	-0.595	-1.09	LRRP1	OG5_136142	ND	Cytoplasm	367-390	TRUE	FALSE	FALSE	FALSE	FALSE	FALSE	FALSE	FALSE	bilobe structure	protein binding	N/A
Tb927.11.9440	Q383Y5	Component of motile flagella 63	CMF63	0.334972	0.65793	0.807866	0.338177	0.373418	0.562203	0.128563	0.948416	-0.521	-0.211	0.116	0.517	0.48	0.31	-0.923	-0.0377	CMF63	OG5_135882	ND	Cytoplasm	ND	FALSE	FALSE	FALSE	FALSE	FALSE	FALSE	FALSE	FALSE	ciliary plasm	N/A	cilium-dependent cell motility
Tb927.11.9550	Q383X4	replication factor C, subunit 4, putative	NA	0.166524	0.230242	0.258014	0.0913884	0.346905	0.741093	0.0624202	0.45708	-0.636	-0.489	0.46	0.79	0.424	0.147	-0.966	-0.365	Tb927.11.9550	OG5_127600	nucleoplasm(75%)	Cytoplasm	ND	FALSE	FALSE	FALSE	FALSE	FALSE	TRUE	FALSE	FALSE	DNA replication factor C complex	ATP binding	DNA repair
Tb927.11.9590	Q383X0	S-adenosylhomocysteine hydrolase, putative	NA	0.799991	0.994433	0.599477	0.147869	0.116255	0.804801	0.252013	0.898547	-0.0901	-0.00222	0.168	0.534	0.584	0.0879	-0.456	0.0496	Tb927.11.9590	OG5_127233	cytoplasm, flagellar cytoplasm	Cytoplasm	ND	FALSE	TRUE	FALSE	FALSE	FALSE	FALSE	FALSE	FALSE	ciliary plasm	adenosylhomocysteinase activity	S-adenosylmethionine cycle
Tb927.11.9720	Q383V7	40S ribosomal protein S27, putative	NA	0.151743	0.173415	0.0325192	0.848727	0.783559	0.0140805	0.714245	0.6716	-0.756	0.64	1.06	0.097	-0.14	1.4	0.204	-0.237	Tb927.11.9720	OG5_127008	cytoplasm(patchy)	Extracellular	ND	FALSE	FALSE	FALSE	FALSE	FALSE	FALSE	TRUE	FALSE	cytoplasm	RNA binding	ribosomal small subunit assembly
Tb927.11.9860	Q383U3	EF-hand domain pair, putative	NA	0.460751	0.683708	0.352346	0.411738	0.0143156	0.705106	0.492095	0.0975719	0.805	0.395	0.913	0.898	2.96	-0.41	0.82	2.06	Tb927.11.9860	OG5_151880	ND	Nucleus	ND	FALSE	FALSE	FALSE	FALSE	FALSE	FALSE	FALSE	FALSE	ciliary plasm	calcium ion binding	N/A
Tb927.11.9920	P21899	NA	NA	0.586312	0.871112	0.125855	0.0580862	0.919145	0.688599	0.964688	0.0952747	-0.319	-0.0846	-0.833	-1.18	-0.0592	0.234	0.0283	1.12	Tb927.11.9920	OG5_126703	cytoplasm(points)	Cytoplasm	ND	FALSE	FALSE	FALSE	FALSE	FALSE	FALSE	FALSE	FALSE	ciliary plasm	protein tag	cellular protein modification process
Tb927.2.1210	Q585H2	retrotransposon hot spot protein 4 (RHS4), putative	RHS4	0.355249	0.880584	0.624657	0.652578	0.370059	0.426437	0.110761	0.226251	-0.278	-0.0397	-0.13	0.134	-0.269	0.238	-0.541	-0.402	RHS4	OG5_126555	ND	Endoplasmic_reticulum	11-22	FALSE	FALSE	FALSE	FALSE	FALSE	FALSE	FALSE	FALSE	nucleoplasm	N/A	mRNA export from nucleus
Tb927.2.2160	Q586J7	paraflagellar rod component, putative	PFC11	0.692322	0.951857	0.359904	0.720062	0.103773	0.653294	0.432726	0.230471	0.391	-0.0532	0.818	0.354	1.68	-0.444	0.855	1.33	PFC11	OG5_151428	ND	Cytoplasm	ND	FALSE	FALSE	FALSE	FALSE	FALSE	FALSE	FALSE	FALSE	SNARE complex	soluble NSF attachment protein activity	SNARE complex disassembly
Tb927.2.2230	Q586K3	hypothetical protein, conserved	NA	0.950639	0.0292868	0.491677	0.886788	0.081737	0.0423308	0.704858	0.136642	0.0182	-0.624	-0.182	-0.0418	-0.54	-0.642	-0.122	-0.498	Tb927.2.2230	OG5_148233	endoplasmic reticulum	Nucleus	44-90	FALSE	FALSE	FALSE	FALSE	FALSE	FALSE	FALSE	FALSE	cytoplasm	N/A	N/A
Tb927.2.2390	Q586L2	hypothetical protein, conserved	NA	0.924467	0.384774	0.898131	0.762272	0.295023	0.383828	0.768652	0.488618	0.0552	-0.459	-0.0666	0.176	0.622	-0.514	-0.188	0.445	Tb927.2.2390	OG5_151427	ND	Nucleus	85-98;132-161	FALSE	FALSE	FALSE	FALSE	FALSE	FALSE	FALSE	FALSE	ciliary plasm	N/A	N/A
Tb927.2.2510	Q586M2	Mitochondrial outer membrane protein porin 1	VDAC1	0.754362	0.550132	0.710185	0.249813	0.194143	0.400595	0.283904	0.0343717	0.243	-0.417	-0.258	0.913	-1.04	-0.659	-0.928	-1.95	VDAC1	OG5_137180	mitochondrion	Cytoplasm	ND	FALSE	FALSE	FALSE	FALSE	FALSE	FALSE	FALSE	FALSE	antipodal site	porin activity	ion transport
Tb927.2.2860	Q587H2	hypothetical protein, conserved	NA	0.119847	0.484846	0.419559	0.306807	0.30425	0.0373151	0.0931598	0.995825	1.37	-0.53	-0.614	-0.876	-0.881	-1.9	1.63	-0.00482	Tb927.2.2860	OG5_167663	axoneme, cytoplasm	Nucleus	ND	FALSE	FALSE	FALSE	FALSE	FALSE	FALSE	FALSE	FALSE	axoneme	N/A	N/A
Tb927.2.340	D7SGA2	retrotransposon hot spot protein 4 (RHS4), putative	RHS4	0.975726	0.16955	0.129544	0.611956	0.637293	0.205979	0.0905392	0.973592	0.0146	-0.608	0.676	-0.244	-0.226	-0.623	0.935	0.0173	RHS4	OG5_126555	cytoplasm(75%)	Cytoplasm	ND	FALSE	FALSE	FALSE	FALSE	FALSE	FALSE	FALSE	FALSE	cytoplasm	N/A	mRNA export from nucleus
Tb927.2.380	Q584N0	retrotransposon hot spot protein 2 (RHS2), putative	RHS2	0.512378	0.879896	0.0719997	0.35099	0.651315	0.431521	0.00799558	0.21367	-0.175	0.0358	-0.452	0.251	-0.12	0.211	-0.878	-0.371	RHS2	OG5_126555	ND	Mitochondrion	ND	FALSE	FALSE	FALSE	FALSE	FALSE	FALSE	FALSE	FALSE	cytoplasm	N/A	mRNA export from nucleus
Tb927.2.400	Q584M9	retrotransposon hot spot protein 2 (RHS2), putative	RHS2	0.631643	0.819823	0.0119357	0.77726	0.40561	0.781698	0.122734	0.313175	0.182	0.0773	-0.959	-0.107	0.319	-0.105	-0.669	0.427	RHS2	OG5_126555	cytoplasm(patchy, 50%)	Mitochondrion	ND	FALSE	FALSE	FALSE	FALSE	FALSE	TRUE	FALSE	FALSE	cytoplasm	N/A	mRNA export from nucleus
Tb927.2.4210	P13735	Phosphoenolpyruvate carboxykinase [ATP], glycosomal	PEPCK	0.666409	0.395372	0.751792	0.737066	0.137921	0.736137	0.729574	0.280294	0.2	0.356	0.131	0.155	0.713	0.156	0.175	0.558	PEPCK	OG5_128435	cytoplasm(points, patchy)	Peroxisome	ND	FALSE	FALSE	FALSE	FALSE	FALSE	FALSE	FALSE	FALSE	contractile vacuole	microtubule binding	gluconeogenesis
Tb927.2.4230	Q586V1	NUP-1 protein, putative	NA	0.0885026	0.709423	0.260182	0.715934	0.679971	0.158479	0.311015	0.481209	-0.788	-0.147	0.452	0.16	-0.182	0.642	-0.496	-0.342	Tb927.2.4230	OG5_153896	ND	Cytoplasm	242-270;802-821;946-965;1090-1109;1234-1253;1378-1397;1522-1541;1666-1685;1810-1829;1954-1973;2098-2117;2242-2261;2386-2405;2530-2549;2674-2693;2818-2837;2962-2981;3106-3149;3333-3353	FALSE	FALSE	FALSE	FALSE	FALSE	FALSE	FALSE	FALSE	nuclear lamina	N/A	N/A
Tb927.2.450	Q584M8	retrotransposon hot spot protein 4 (RHS4), putative	RHS4	0.0644168	0.370439	0.118197	0.930725	0.55222	0.25848	0.588966	0.534505	-1.09	-0.448	0.805	0.0479	-0.33	0.637	-0.328	-0.378	RHS4	OG5_126555	ND	Cytoplasm	ND	FALSE	FALSE	FALSE	FALSE	FALSE	FALSE	FALSE	FALSE	nucleus	N/A	mRNA export from nucleus
Tb927.2.470	Q584M7	retrotransposon hot spot protein 4 (RHS4), putative	RHS4	0.110469	0.0372097	0.0649508	0.234177	0.280378	0.729186	0.309029	0.0484065	-1.01	-1.21	1.06	0.734	-0.663	-0.209	-0.683	-1.4	RHS4	OG5_126555	ND	Cytoplasm	13-25	FALSE	FALSE	FALSE	FALSE	FALSE	FALSE	FALSE	FALSE	nucleus	N/A	mRNA export from nucleus
Tb927.2.5010	Q586T9	Meiotic cell cortex C-terminal pleckstrin homology, putative	NA	0.594908	0.0428238	0.11785	0.219141	0.0385909	0.170125	0.0607833	0.379763	0.286	1.04	-0.782	0.675	1.2	0.759	-1.17	0.522	Tb927.2.5010	OG5_148796	hook complex	Nucleus	ND	FALSE	FALSE	FALSE	FALSE	FALSE	FALSE	FALSE	FALSE	bilobe structure	N/A	N/A
Tb927.2.560	Q584M5	retrotransposon hot spot protein 4 (RHS4), putative	RHS4	0.637853	0.801996	0.190156	0.457354	0.165074	0.489478	0.98962	0.533334	0.208	-0.0989	-0.532	-0.331	-0.633	-0.307	0.00628	-0.303	RHS4	OG5_126555	cytoplasm(reticulated)	Cytoplasm	34-47	FALSE	FALSE	FALSE	FALSE	FALSE	FALSE	FALSE	FALSE	cytoplasm	N/A	mRNA export from nucleus
Tb927.2.5870	Q586F1	hypothetical protein, conserved	NA	0.750919	0.979272	0.264648	0.184289	0.521199	0.768524	0.074226	0.511551	0.263	0.0192	-0.843	1.13	0.534	-0.243	-1.71	-0.598	Tb927.2.5870	OG5_142208	flagellar tip	Cytoplasm	ND	FALSE	FALSE	FALSE	FALSE	FALSE	FALSE	FALSE	FALSE	ciliary plasm	N/A	N/A
Tb927.2.6090	P17843	60S ribosomal protein L44	RPL44	0.587838	0.044965	0.749244	0.94802	0.27771	0.0242295	0.768014	0.348376	-0.226	0.803	0.119	0.0271	0.461	1.03	-0.135	0.434	RPL44	OG5_126988	ND	Cytoplasm	ND	FALSE	FALSE	FALSE	FALSE	FALSE	FALSE	FALSE	FALSE	cytoplasm	structural constituent of ribosome	translation
Tb927.2.6100	Q586N7	hypothetical protein, conserved	NA	0.790789	0.0445982	0.208404	0.373778	0.0541903	0.0415204	0.992826	0.299431	-0.0995	0.725	0.434	0.338	0.772	0.824	-0.00369	0.434	Tb927.2.6100	OG5_169834	cytoplasm(points)	Nucleus	29-39;152-161;194-241;377-408	FALSE	FALSE	FALSE	FALSE	FALSE	FALSE	FALSE	FALSE	cytoplasm	telomeric DNA binding	mitochondrial RNA processing
Tb927.3.1010	Q57WY4	Cytoskeleton-associated protein 64 kDa	CAP64	0.0255921	0.160538	0.0687069	0.162324	0.170418	0.00183112	0.0234329	0.0183125	0.597	-0.317	0.422	0.353	-0.346	-0.914	0.666	-0.699	CAP64	OG5_158612	ND	Nucleus	203-225;582-591	FALSE	FALSE	FALSE	FALSE	FALSE	FALSE	FALSE	FALSE	cortical cytoskeleton	N/A	N/A
Tb927.3.1120	Q57WZ3	GTP-binding nuclear protein rtb2, putative	RTB2	0.664385	0.953631	0.927608	0.0870739	0.649597	0.627472	0.250705	0.230142	-0.383	0.0458	-0.0716	-1.59	-0.401	0.429	1.13	1.19	RTB2	OG5_127514	nuclear pore	Cytoplasm	ND	FALSE	FALSE	FALSE	FALSE	FALSE	FALSE	FALSE	FALSE	cytoplasm	GTP binding	intracellular protein transport
Tb927.3.1840	Q57ZC7	3-oxo-5-alpha-steroid 4-dehydrogenase, putative	NA	0.998649	0.250162	0.919876	0.35946	0.623648	0.300693	0.358148	0.690374	0.000774	-0.482	0.0411	-0.425	-0.225	-0.482	0.467	0.2	Tb927.3.1840	OG5_127767	nucleus, cytoplasm(reticulated, review)	Endoplasmic_reticulum	ND	FALSE	FALSE	FALSE	FALSE	FALSE	FALSE	FALSE	FALSE	cytoplasm	oxidoreductase activity	dolichol biosynthetic process
Tb927.3.1900	Q57ZC1	conserved protein, unknown function	NA	0.954376	0.533962	0.964622	0.463456	0.179023	0.616568	0.492726	0.0675829	-0.0428	-0.419	0.0297	0.554	-1.04	-0.376	-0.567	-1.59	Tb927.3.1900	OG5_142727	axoneme	Nucleus	87-132;327-352;456-766;781-857	FALSE	FALSE	FALSE	FALSE	FALSE	FALSE	FALSE	FALSE	axoneme	N/A	N/A
Tb927.3.2050	Q57ZA6	Minicircle replication factor 172	MiRF172	0.0189216	0.729128	0.0526924	0.939026	0.231366	0.0101181	0.458614	0.302327	-0.81	0.0967	0.578	0.0238	0.383	0.907	-0.255	0.359	MiRF172	OG5_150173	ND	Nucleus	11-34;882-896;941-952;1082-1283;1346-1381;1404-1572	FALSE	TRUE	FALSE	FALSE	FALSE	FALSE	FALSE	FALSE	kinesin complex	ATP hydrolysis activity	microtubule-based movement
Tb927.3.2440	Q582V7	AGC essential kinase 1	AEK1	0.038475	0.098061	0.249893	0.273216	0.864201	0.497225	0.0498841	0.249951	-1.01	-0.699	0.474	0.503	-0.0769	0.308	-1.04	-0.58	AEK1	OG5_129514	cytoplasm, endocytic, flagellar cytoplasm, nuclear lumen	Nucleus	6-50	FALSE	FALSE	FALSE	FALSE	FALSE	FALSE	FALSE	FALSE	ciliary plasm	ATP binding	mitotic cytokinesis
Tb927.3.2470	Q582W0	Pumilio homology domain family member 8	PUF8	0.352463	0.259018	0.00824695	0.0102891	0.254194	0.929344	0.50543	0.128866	0.371	0.406	1.06	1.14	0.459	0.0348	0.289	-0.682	PUF8	OG5_128182	nucleolus	Nucleus	65-91;594-604	FALSE	FALSE	FALSE	FALSE	FALSE	FALSE	FALSE	FALSE	nucleolus	mRNA binding	regulation of translation
Tb927.3.2750	Q57ZN7	hypothetical protein, conserved	NA	0.202855	0.33893	0.191134	0.93873	0.38149	0.659617	0.867894	0.385229	-0.875	-0.58	0.805	0.0513	-0.592	0.295	-0.122	-0.643	Tb927.3.2750	OG5_154522	ND	Nucleus	300-309;773-788;803-812;816-825	FALSE	FALSE	FALSE	FALSE	FALSE	FALSE	FALSE	FALSE	nucleolus	N/A	N/A
Tb927.3.2950	Q57ZL7	ribonuclease inhibitor- like protein	NA	0.364866	0.727489	0.707876	0.228298	0.0656018	0.230053	0.112471	0.512772	-0.231	0.0785	0.0845	0.311	0.493	0.31	-0.458	0.182	Tb927.3.2950	OG5_128963	axoneme, cytoplasm(points, weak)	Cytoplasm	738-757	FALSE	FALSE	FALSE	FALSE	FALSE	FALSE	FALSE	FALSE	axoneme	N/A	N/A
Tb927.3.3200	Q57V66	Domain of unknown function (DUF4586), putative	NA	0.916	0.280203	0.187092	0.0944316	0.624721	0.384814	0.556645	0.257671	-0.041	-0.383	0.473	0.684	0.191	-0.342	-0.252	-0.493	Tb927.3.3200	OG5_157970	axoneme(cell cycle dependent), cytoplasm(weak, points, reticulated)	Nucleus	139-161;297-316	FALSE	FALSE	FALSE	FALSE	FALSE	FALSE	FALSE	FALSE	axoneme	N/A	N/A
Tb927.3.3270	O15648	ATP-dependent 6-phosphofructokinase, glycosomal	PFK	0.117949	0.577441	0.325569	0.445566	0.454538	0.0470202	0.181796	0.988766	0.505	-0.155	-0.276	-0.238	-0.233	-0.659	0.466	0.00476	PFK	OG5_126758	ND	Peroxisome	280-290	FALSE	FALSE	FALSE	FALSE	FALSE	FALSE	FALSE	FALSE	cytoplasm	6-phosphofructokinase activity	glycolytic process
Tb927.3.3300	Q57V56	Flagellum attachment zone protein 19	FAZ19	0.981578	0.408367	0.0623922	0.95426	0.535651	0.472232	0.114233	0.536929	-0.0177	-0.575	1.37	-0.0441	0.479	-0.558	1.39	0.523	FAZ19	OG5_179256	flagellum attachment zone, cytoplasm(points, weak)	Nucleus	17-86	FALSE	FALSE	FALSE	FALSE	FALSE	FALSE	FALSE	FALSE	cilium	N/A	N/A
Tb927.3.3320	Q57V54	60S ribosomal protein L13, putative	NA	0.0274563	0.631313	0.364594	0.843684	0.591723	0.0115876	0.21632	0.504832	-0.939	0.168	0.32	-0.0768	0.21	1.11	-0.542	0.287	Tb927.3.3320	OG5_127128	cytoplasm(patchy)	Cytoplasm	37-48;200-210	FALSE	FALSE	FALSE	FALSE	FALSE	FALSE	FALSE	FALSE	cytoplasm	RNA binding	N/A
Tb927.3.3450	Q57XJ5	ADP-ribosylation factor-like protein 3, putative	ARL3A	0.0368216	0.656832	0.490515	0.0561811	0.8233	0.0167349	0.00403037	0.112818	-0.948	0.167	0.261	0.855	0.0936	1.11	-1.54	-0.762	ARL3A	OG5_130091	axoneme, basal body, cytoplasm, nucleus(patchy)	Mitochondrion	ND	FALSE	TRUE	FALSE	FALSE	FALSE	FALSE	FALSE	FALSE	axoneme	GTP binding	cell population proliferation
Tb927.3.3560	Q57XK6	U-box domain containing protein, putative	NA	0.141437	0.309076	0.0192071	0.304857	0.00372602	0.0251868	0.10984	0.000980476	0.81	-0.491	-1.23	0.553	-1.8	-1.3	-0.971	-2.35	Tb927.3.3560	OG5_151268	axoneme, cytoplasm	Cytoplasm	459-486	FALSE	TRUE	FALSE	FALSE	FALSE	FALSE	FALSE	FALSE	axoneme	N/A	N/A
Tb927.3.3670	Q57WA3	Triple RNA binding domain protein 3	TRRM3	0.439205	0.883569	0.233813	0.658049	0.385504	0.518261	0.0487778	0.23863	0.247	0.0414	0.345	-0.14	0.278	-0.205	0.732	0.418	TRRM3	OG5_152835	nucleolus(strong)	Nucleus	1-55;366-377;532-552;569-591;602-623	FALSE	TRUE	FALSE	FALSE	FALSE	FALSE	FALSE	FALSE	nucleolus	RNA binding	RNA processing
Tb927.3.3760	Q57WB4	tryparedoxin 1b, putative	TXN1b	0.0202059	0.64742	0.845783	0.349013	0.10567	0.00882399	0.118099	0.0271808	-1.15	0.184	-0.0782	-0.427	0.762	1.34	-0.804	1.19	TXN1b	OG5_128012	cytoplasm, flagellar cytoplasm, nuclear lumen	Cytoplasm	ND	FALSE	FALSE	FALSE	FALSE	FALSE	FALSE	FALSE	FALSE	ciliary plasm	N/A	hydrogen peroxide catabolic process
Tb927.3.3770	Q57WB3	paraflagellar rod component, putative	PFC6	0.252875	0.450779	0.427986	0.465578	0.655568	0.626042	0.796421	0.792098	1.54	0.899	-0.946	0.972	0.591	-0.646	-0.373	-0.381	PFC6	OG5_154620	ND	Cytoplasm	ND	FALSE	FALSE	FALSE	FALSE	FALSE	FALSE	FALSE	FALSE	paraflagellar rod	N/A	N/A
Tb927.3.3950	Q57WD1	hypothetical protein, conserved	NA	0.74278	0.209098	0.859535	0.902585	0.925671	0.152559	0.789463	0.978791	-0.246	0.866	0.119	0.0917	0.0699	1.11	-0.219	-0.0218	Tb927.3.3950	OG5_153038	ND	Nucleus	48-57;105-130;179-221;405-416	FALSE	FALSE	FALSE	FALSE	FALSE	FALSE	FALSE	FALSE	cytosol	N/A	ribosomal small subunit biogenesis
Tb927.3.4300	Q580L2	Paraflagellar rod protein 1-2	PFR1-2	0.977942	0.752785	0.293074	0.498574	0.169688	0.799282	0.820035	0.503459	-0.0189	-0.193	0.656	0.467	0.972	-0.174	0.171	0.505	PFR1-2	OG5_130385	ND	Cytoplasm	ND	FALSE	FALSE	FALSE	FALSE	FALSE	FALSE	FALSE	FALSE	ciliary plasm	N/A	cilium-dependent cell motility
Tb927.3.4720	Q582R3	dynamin-1-like protein	DLP1	0.265216	0.244919	0.323293	0.0665216	0.012383	0.941288	0.93693	0.43788	0.663	0.62	0.523	1.14	1.64	-0.0429	0.0505	0.5	DLP1	OG5_126660	ND	Cytoplasm	ND	FALSE	FALSE	FALSE	FALSE	FALSE	FALSE	FALSE	FALSE	cell tip	GTPase activity	mitochondrial fission
Tb927.3.4910	Q582P4	signal peptide peptidase, putative	NA	0.713849	0.441557	0.256563	0.217702	0.131098	0.297155	0.588366	0.779736	-0.167	0.316	0.471	0.575	0.714	0.482	-0.27	0.139	Tb927.3.4910	OG5_128374	ND	Endoplasmic_reticulum	337-347	FALSE	FALSE	FALSE	FALSE	FALSE	FALSE	FALSE	FALSE	integral component of cytoplasmic side of endoplasmic reticulum membrane	aspartic endopeptidase activity, intramembrane cleaving	membrane protein proteolysis
Tb927.3.5050	Q582N2	60S ribosomal protein L4	NA	0.217137	0.0959509	0.613422	0.778043	0.387256	0.0117892	0.0832163	0.589538	-0.331	0.409	-0.118	0.0737	0.229	0.74	-0.523	0.155	Tb927.3.5050	OG5_127050	nucleolus, cytoplasm	Nucleus	320-330;354-374	FALSE	FALSE	FALSE	FALSE	FALSE	FALSE	FALSE	FALSE	cytoplasm	RNA binding	translation
Tb927.3.5330	Q580U2	centaurin beta 5	Cnt-b5	0.0996991	0.862284	0.699419	0.94154	0.323309	0.0752556	0.065252	0.400928	-0.563	0.0506	-0.113	0.0239	0.327	0.614	-0.7	0.304	Cnt-b5	OG5_127190	endocytic, nucleolus	Nucleus	ND	FALSE	FALSE	FALSE	FALSE	FALSE	FALSE	FALSE	FALSE	Golgi apparatus	GTPase activator activity	N/A
Tb927.3.5370	Q580T8	hypothetical protein, conserved	NA	0.0170194	0.0233908	0.00917898	0.645665	0.522834	0.673551	0.669923	0.867992	-1.02	-0.854	1.01	0.177	0.247	0.162	-0.179	0.0698	Tb927.3.5370	OG5_152260	nuclear lumen(points)	Nucleus	139-203;217-236;252-261	FALSE	FALSE	FALSE	FALSE	FALSE	FALSE	FALSE	FALSE	kinetoplast	N/A	N/A
Tb927.3.5620	Q580R3	Facilitates chromatin transcription complex subunit spt16	NA	0.258705	0.570221	0.641162	0.849543	0.807767	0.111557	0.403255	0.960873	0.714	-0.315	-0.258	-0.117	-0.15	-1.03	0.573	-0.0332	Tb927.3.5620	OG5_128055	ND	Nucleus	734-743;898-961	FALSE	TRUE	FALSE	FALSE	FALSE	FALSE	FALSE	FALSE	nucleoplasm	N/A	N/A
Tb927.4.1100	Q580D8	ribosomal protein L21E (60S), putative	NA	0.00595335	0.928678	0.107045	0.192857	0.662282	0.00505544	6.11419e-05	0.414493	2.07	-0.0522	0.985	-0.875	-0.286	-2.12	3.93	0.59	Tb927.4.1100	OG5_126766	cytoplasm(patchy)	Cytoplasm	ND	FALSE	FALSE	FALSE	FALSE	FALSE	FALSE	FALSE	FALSE	cytoplasm	structural constituent of ribosome	N/A
Tb927.4.1300	Q581V1	Cytoskeleton-associated protein 42 kDa	CAP42	0.503021	0.83451	0.611081	0.600619	0.508146	0.626891	0.145307	0.28603	-0.492	-0.136	-0.333	0.384	-0.486	0.356	-1.21	-0.87	CAP42	OG5_148035	ND	Cytoplasm	ND	FALSE	FALSE	FALSE	FALSE	FALSE	FALSE	FALSE	FALSE	cortical cytoskeleton	N/A	mitotic cleavage furrow ingression
Tb927.4.1330	Q581U8	DNA topoisomerase IB, large subunit	NA	0.39043	0.700346	0.326161	0.345785	0.732987	0.236057	0.46617	0.575907	-0.238	0.0943	-0.244	-0.262	-0.0934	0.332	-0.22	0.168	Tb927.4.1330	OG5_127702	nucleoplasm	Nucleus	585-691	FALSE	FALSE	FALSE	FALSE	FALSE	FALSE	FALSE	FALSE	membrane	DNA topoisomerase type I (single strand cut, ATP-independent) activity	DNA topological change
Tb927.4.1680	Q581R3	ZFP family member, putative	ZC3H10	0.327978	0.107928	0.000808907	0.208333	0.0627285	0.0229861	0.205977	0.532488	0.27	-0.409	-1.01	-0.351	-0.538	-0.679	-0.387	-0.187	ZC3H10	OG5_154567	axoneme, cytoplasm	Nucleus	217-227	FALSE	FALSE	FALSE	FALSE	FALSE	FALSE	FALSE	FALSE	axoneme	N/A	N/A
Tb927.4.1790	Q581Q2	ribosomal protein L3, putative	NA	0.912157	0.614022	0.209189	0.293014	0.725292	0.575255	0.859928	0.513868	0.0381	-0.156	0.399	0.37	0.122	-0.195	0.0668	-0.249	Tb927.4.1790	OG5_126874	ND	Cytoplasm	393-423	FALSE	FALSE	FALSE	FALSE	FALSE	FALSE	FALSE	FALSE	cytosolic large ribosomal subunit	RNA binding	ribosomal large subunit assembly
Tb927.4.1860	Q583K7	ribosomal protein S19, putative	NA	0.0410262	0.690096	0.00965073	0.538989	0.631037	0.0803782	0.351916	0.901024	-0.562	-0.0911	0.668	-0.157	-0.123	0.471	0.264	0.0347	Tb927.4.1860	OG5_127080	cytoplasm(patchy)	Cytoplasm	ND	FALSE	FALSE	FALSE	FALSE	FALSE	FALSE	FALSE	FALSE	cytoplasm	RNA binding	ribosomal small subunit assembly
Tb927.4.2070	Q583I6	antigenic protein, putative	NA	0.357988	0.000211044	0.070731	0.106492	0.00851457	0.00376134	0.388839	0.245857	0.46	2.13	0.846	0.834	1.48	1.67	0.472	0.642	Tb927.4.2070	OG5_136908	ND	Cytoplasm	566-575;731-745;4380-4391	FALSE	FALSE	FALSE	FALSE	FALSE	FALSE	FALSE	FALSE	cortical cytoskeleton	N/A	N/A
Tb927.4.2080	Q583I5	Coiled-coil and C2 domain-containing protein	CC2D	0.101563	0.843115	0.916312	0.253405	0.274178	0.073678	0.678025	0.962128	-1.11	0.114	0.0607	-0.755	-0.721	1.22	-0.295	0.0336	CC2D	OG5_151554	flagellum attachment zone	Cytoplasm	689-709	FALSE	FALSE	FALSE	FALSE	FALSE	FALSE	FALSE	FALSE	cell body	N/A	cilium assembly
Tb927.4.2180	Q584G9	60S ribosomal protein L35a, putative	NA	0.240127	0.44608	0.270567	0.948018	0.720019	0.607717	0.0524405	0.699171	1.73	0.988	1.45	-0.0936	0.516	-0.74	3.27	0.609	Tb927.4.2180	OG5_127072	ND	Cytoplasm	ND	FALSE	FALSE	FALSE	FALSE	FALSE	FALSE	FALSE	FALSE	cytosolic large ribosomal subunit	structural constituent of ribosome	cytoplasmic translation
Tb927.4.2630	Q584C4	ATP-dependent DEAD/H RNA helicase, putative	NA	0.276697	0.909481	0.296837	0.150642	0.715102	0.321284	0.14669	0.31269	-0.743	-0.068	0.637	0.998	0.245	0.675	-1.11	-0.754	Tb927.4.2630	OG5_128298	nucleolus	Nucleus	12-21;834-843	FALSE	FALSE	FALSE	FALSE	FALSE	FALSE	FALSE	FALSE	nucleolus	ATP binding	nucleobase-containing compound metabolic process
Tb927.4.2920	Q583W9	hypothetical protein, conserved	NA	0.967773	0.492959	0.263215	0.0541215	0.695925	0.513244	0.369308	0.142659	0.0229	-0.351	0.58	1.17	0.222	-0.373	-0.566	-0.947	Tb927.4.2920	OG5_161433	ND	Cytoplasm	222-232;908-917	FALSE	FALSE	FALSE	FALSE	FALSE	FALSE	FALSE	FALSE	axoneme	N/A	N/A
Tb927.4.3060	Q583Y3	hypothetical protein, conserved	NA	0.154939	0.133635	0.561166	0.918732	0.727895	0.0109121	0.442249	0.681646	-0.403	0.382	0.143	-0.0279	0.0953	0.785	-0.232	0.123	Tb927.4.3060	OG5_162295	ND	Nucleus	22-41;53-84;115-144	FALSE	FALSE	FALSE	FALSE	FALSE	FALSE	FALSE	FALSE	nucleoplasm	N/A	N/A
Tb927.4.3550	Q585J5	60S ribosomal protein L13a, putative	NA	0.365429	0.0083456	0.965263	0.573249	0.264709	0.00244737	0.178274	0.601882	-0.298	0.873	-0.0126	0.184	0.37	1.17	-0.495	0.186	Tb927.4.3550	OG5_126957	cytoplasm(patchy), nucleolus(50%, strong)	Cytoplasm	5-14	FALSE	FALSE	FALSE	FALSE	FALSE	FALSE	FALSE	FALSE	cytoplasm	mRNA binding	negative regulation of translation
Tb927.4.3840	Q583H8	nucleolar protein, putative	NA	0.0195063	0.311566	0.00595966	0.069013	0.980959	0.112252	0.140162	0.0902356	-0.936	-0.334	1.03	0.7	-0.00864	0.602	-0.609	-0.708	Tb927.4.3840	OG5_126796	nucleolus	Nucleus	68-105;181-190;569-578	FALSE	FALSE	FALSE	FALSE	FALSE	FALSE	FALSE	FALSE	nucleolus	N/A	N/A
Tb927.4.4490	Q95PL4	multidrug resistance protein E	MRPE	0.539672	0.547862	0.578077	0.624107	0.0472181	0.257684	0.570194	0.0283236	0.202	-0.177	0.164	0.161	-0.698	-0.379	0.205	-0.859	MRPE	OG5_126561	ND	Cell_membrane	706-741	FALSE	FALSE	FALSE	FALSE	FALSE	FALSE	FALSE	FALSE	ATP-binding cassette (ABC) transporter complex	ATP binding	response to drug
Tb927.4.4690	Q583F4	hypothetical protein, conserved	NA	0.548951	0.49861	0.47713	0.00407098	0.291027	0.2368	0.0695106	0.0521854	0.466	-0.471	0.495	2.59	0.832	-0.937	-1.63	-1.76	Tb927.4.4690	OG5_146053	axoneme, cytoplasm(weak, reticulated), cytoplasm(points)	Nucleus	ND	FALSE	FALSE	FALSE	FALSE	FALSE	FALSE	FALSE	FALSE	axoneme	N/A	N/A
Tb927.4.4700	Q583F5	hypothetical protein, conserved	NA	0.463573	0.61162	0.40096	0.0104681	0.0870698	0.243148	0.21616	0.328684	0.612	-0.378	0.63	2.39	1.49	-0.99	-1.15	-0.901	Tb927.4.4700	OG5_143475	axoneme, cytoplasm(weak)	Nucleus	190-204	FALSE	FALSE	FALSE	FALSE	FALSE	FALSE	FALSE	FALSE	axoneme	N/A	N/A
Tb927.4.4950	Q584L0	Nucleolar protein 61	NOP61	0.926355	0.715076	0.16978	0.94663	0.979333	0.675643	0.266287	0.970116	-0.0773	0.274	1.06	-0.056	-0.0217	0.351	1.04	0.0343	NOP61	OG5_140314	nucleolus, cytoplasm(reticulated, weak)	Nucleus	29-39;162-184	FALSE	FALSE	FALSE	FALSE	FALSE	FALSE	FALSE	FALSE	nucleolus	N/A	N/A
Tb927.4.5120	Q584J4	hypothetical protein, conserved	NA	0.19721	0.746374	0.213097	0.650526	0.648235	0.121268	0.562426	0.997654	-0.654	0.143	0.564	0.224	0.225	0.797	-0.314	0.00159	Tb927.4.5120	OG5_126854	ND	Nucleus	2-18;362-1210	FALSE	FALSE	FALSE	FALSE	FALSE	FALSE	FALSE	FALSE	N/A	N/A	N/A
Tb927.4.560	Q57UR9	Cytoplasmic dynein 2 heavy chain (DYNC2H1), putative	DYNC2H1	0.365758	0.241105	0.22214	0.0354698	0.00483318	0.0616371	0.0736431	0.372479	-0.412	0.482	0.503	1.02	1.47	0.894	-0.932	0.444	DYNC2H1	OG5_126558	ND	Cytoplasm	2955-2967	FALSE	FALSE	FALSE	FALSE	FALSE	FALSE	FALSE	FALSE	axoneme	dynein intermediate chain binding	chromosome segregation
Tb927.5.1120	Q57W57	Phage tail fibre repeat, putative	TZP656	0.0181514	0.903946	0.147836	0.283303	0.155563	0.0146122	0.868986	0.0313711	-1.51	0.0623	0.776	-0.632	0.85	1.57	-0.104	1.48	TZP656	OG5_145018	ND	Cytoplasm	3454-3483;5365-5391;5812-5824	FALSE	FALSE	FALSE	FALSE	FALSE	FALSE	FALSE	FALSE	ciliary transition zone	N/A	N/A
Tb927.5.1210	Q57VE2	short-chain dehydrogenase, putative	NA	0.552852	0.369939	0.0407384	0.497196	0.0410255	0.172587	0.528489	0.178697	0.212	-0.288	-0.701	-0.243	-0.782	-0.5	-0.246	-0.539	Tb927.5.1210	OG5_126812	endoplasmic reticulum	Endoplasmic_reticulum	ND	FALSE	TRUE	FALSE	FALSE	FALSE	FALSE	FALSE	FALSE	endoplasmic reticulum	N/A	N/A
Tb927.5.1560	Q57VA7	ATP-dependent DEAD/H RNA helicase, putative	NA	0.388381	0.127961	0.0419102	0.731738	0.420512	0.586979	0.499211	0.667925	-0.341	-0.553	0.765	0.134	0.318	-0.213	0.291	0.184	Tb927.5.1560	OG5_128093	nucleolus	Nucleus	166-176;395-405;703-712	FALSE	FALSE	FALSE	FALSE	FALSE	FALSE	FALSE	FALSE	nucleolus	ATP binding	nucleobase-containing compound metabolic process
Tb927.5.1930	Q57ZR2	signal peptidase subunit, putative	NA	0.0168886	0.755392	0.0075011	0.0649017	0.189133	0.0294089	0.100982	0.579569	-1.32	-0.139	1.36	0.979	0.675	1.18	-0.94	-0.304	Tb927.5.1930	OG5_158394	endoplasmic reticulum	Endoplasmic_reticulum	ND	FALSE	FALSE	FALSE	FALSE	FALSE	FALSE	FALSE	FALSE	endoplasmic reticulum	N/A	protein targeting to ER
Tb927.5.2090	Q57ZS8	kinesin, putative	KIN2A	0.180453	0.056542	0.101588	0.24787	0.00664393	0.00552898	0.354683	0.0936451	-0.576	0.758	0.64	0.492	1.3	1.33	-0.428	0.804	KIN2A	OG5_127071	cytoplasm(weak, reticulated, points)	Cytoplasm	512-584;833-842;859-868;991-1010	FALSE	FALSE	FALSE	FALSE	FALSE	FALSE	FALSE	FALSE	ciliary basal body	ATP binding	cilium assembly
Tb927.5.2270	Q582D8	Component of motile flagella 44	CMF44	0.182454	0.099147	0.144621	0.421315	0.157599	0.00978483	0.450984	0.554214	0.476	-0.536	-0.469	-0.282	-0.507	-1.01	0.289	-0.226	CMF44	OG5_131311	axoneme	Cytoplasm	330-341	FALSE	FALSE	FALSE	FALSE	FALSE	FALSE	FALSE	FALSE	axoneme	N/A	N/A
Tb927.5.2530	Q582B4	RNA cytidine acetyltransferase	NAT10	0.000615809	0.0470325	0.00266999	0.212352	0.000685863	0.0291897	0.0432757	0.0155706	-2.11	-0.941	1.57	0.632	2.09	1.17	-1.18	1.46	NAT10	OG5_127380	nucleolus, cytoplasm(weak)	Nucleus	ND	FALSE	FALSE	FALSE	FALSE	FALSE	FALSE	FALSE	FALSE	nucleolus	rRNA cytidine N-acetyltransferase activity	rRNA acetylation involved in maturation of SSU-rRNA
Tb927.5.2660	Q57ZU2	NUC130/3NT domain/SDA1, putative	NA	0.117108	0.784064	0.311282	0.141889	0.369244	0.1776	0.0555097	0.0395227	-0.602	-0.0901	0.339	0.561	-0.335	0.512	-0.824	-0.896	Tb927.5.2660	OG5_128086	nucleolus(50%)	Nucleus	276-285;497-531;593-693	FALSE	FALSE	FALSE	FALSE	FALSE	FALSE	TRUE	FALSE	nucleolus	N/A	ribosomal large subunit biogenesis
Tb927.5.2790	Q57ZV5	mitochondrial DNA polymerase beta-PAK	Pol beta-PAK	0.137668	0.858192	0.0536398	0.318087	0.363083	0.179942	0.517981	0.932085	-0.792	-0.0819	0.947	0.521	0.473	0.71	-0.366	-0.0478	Pol beta-PAK	OG5_140397	kinetoplast	Nucleus	1-326	FALSE	FALSE	FALSE	FALSE	FALSE	FALSE	FALSE	FALSE	antipodal site	DNA-directed DNA polymerase activity	double-strand break repair via nonhomologous end joining
Tb927.5.2950	Q57ZX1	Component of motile flagella 3	CMF3	0.699759	0.419555	0.762648	0.82031	0.445536	0.731501	0.919129	0.621272	0.251	0.475	-0.176	0.148	0.501	0.223	-0.0723	0.353	CMF3	OG5_149974	axoneme, cytoplasm	Cytoplasm	ND	FALSE	FALSE	FALSE	FALSE	FALSE	FALSE	FALSE	FALSE	axoneme	alpha-tubulin binding	cilium-dependent cell motility
Tb927.5.3610	Q57UA5	adaptor complex protein (AP) 3 delta subunit 1, putative	NA	0.0176914	0.35639	0.46758	0.548031	0.165283	0.0032233	0.0306083	0.451941	-1.07	0.34	0.267	0.246	0.584	1.41	-1.05	0.338	Tb927.5.3610	OG5_128382	ND	Cytoplasm	699-711;811-833	FALSE	FALSE	FALSE	FALSE	FALSE	FALSE	FALSE	FALSE	AP-3 adaptor complex	N/A	Golgi to vacuole transport
Tb927.5.3850	Q57U81	XRN 5'-3' exonuclease N-terminus, putative	XRNE	0.924627	0.920707	0.269747	0.338248	0.593085	0.854359	0.905455	0.691086	0.0291	-0.0274	0.311	0.3	0.165	-0.0565	0.0401	-0.134	XRNE	OG5_143914	nucleolus	Nucleus	783-839	FALSE	TRUE	FALSE	FALSE	FALSE	FALSE	FALSE	FALSE	nucleolus	5'-3' exoribonuclease activity	nuclear-transcribed mRNA catabolic process
Tb927.5.3900	Q57U76	Galactose oxidase, central domain/Domain of unknown function (DUF4110), putative	NA	0.578236	0.433757	0.863239	0.416132	0.752853	0.217766	0.175067	0.307834	-0.328	0.416	-0.0906	0.483	-0.185	0.744	-0.902	-0.669	Tb927.5.3900	OG5_129091	ND	Nucleus	415-455;562-571;697-729	FALSE	FALSE	FALSE	FALSE	FALSE	FALSE	FALSE	FALSE	ciliary plasm	N/A	N/A
Tb927.5.4170	Q57Z31	histone H4, putative	NA	0.970446	0.432818	0.0957225	0.0566307	0.401686	0.50478	0.693338	0.287745	-0.0163	-0.312	-0.69	-0.897	-0.374	-0.296	0.191	0.523	Tb927.5.4170	OG5_126573	ND	Cytoplasm	ND	FALSE	FALSE	FALSE	FALSE	FALSE	FALSE	FALSE	FALSE	ciliary plasm	DNA binding	nucleosome assembly
Tb927.5.4400	Q57Z09	hypothetical protein, conserved	NA	0.925305	0.235613	0.0598864	0.926569	0.114392	0.24858	0.156437	0.168831	0.0438	-0.509	-0.84	-0.0431	-0.773	-0.553	-0.753	-0.729	Tb927.5.4400	OG5_143272	axoneme, cytoplasm(points)	Nucleus	ND	FALSE	FALSE	FALSE	FALSE	FALSE	FALSE	FALSE	FALSE	axoneme	N/A	N/A
Tb927.5.4480	Q57Z01	paraflagellar rod component par4, putative	NA	0.0116925	0.888019	0.626886	0.579921	0.327472	0.0150801	0.107927	0.688906	1.47	0.0651	-0.226	0.288	0.515	-1.4	0.954	0.227	Tb927.5.4480	OG5_144690	ND	Golgi_apparatus	32-51;240-249	FALSE	FALSE	FALSE	FALSE	FALSE	FALSE	FALSE	FALSE	N/A	N/A	N/A
Tb927.5.500	Q57VW3	hypothetical protein, conserved	NA	0.184309	0.0954502	0.925712	0.918728	0.43001	0.00953366	0.229199	0.416795	1.05	-1.2	0.0636	0.0778	-0.609	-2.24	1.03	-0.686	Tb927.5.500	OG5_130035	axoneme, cytoplasm(points)	Cytoplasm	279-288;690-699;936-947;1154-1178	FALSE	FALSE	FALSE	FALSE	FALSE	FALSE	FALSE	FALSE	axoneme	N/A	cell motility
Tb927.5.800	Q57W25	casein kinase I, isoform 2	CK1.2	0.474116	0.392585	0.178678	0.715225	0.565473	0.958207	0.423784	0.395078	0.271	0.291	-0.466	0.137	-0.217	0.0197	-0.333	-0.354	CK1.2	OG5_126780	cytoplasm, basal body, cell tip(distal), flagellar cytoplasm, nuclear lumen	Cytoplasm	301-330	FALSE	FALSE	FALSE	FALSE	FALSE	FALSE	FALSE	FALSE	cell tip	ATP binding	endocytosis
Tb927.6.1400	Q585A7	cyclophilin-type peptidyl-prolyl cis-trans isomerase, putative	PPIase	0.183862	0.348687	0.279557	0.0166101	0.0573906	0.604292	0.0520902	0.564768	1.4	0.872	-1.01	2.73	2.08	-0.533	-2.33	-0.65	PPIase	OG5_148842	axoneme, cytoplasm(weak), nucleoplasm(weak)	Nucleus	ND	FALSE	FALSE	FALSE	FALSE	FALSE	TRUE	FALSE	FALSE	axoneme	cyclosporin A binding	protein folding
Tb927.6.1800	Q585N1	protein phosphatase 2C, putative	NA	0.160784	0.870159	0.0585848	0.150689	0.330831	0.20423	0.307501	0.647328	-0.78	-0.0784	0.969	0.8	0.531	0.701	-0.611	-0.27	Tb927.6.1800	OG5_136796	cytoplasm, nucleus, flagellar cytoplasm, nuclear lumen	Cytoplasm	ND	FALSE	FALSE	FALSE	FALSE	FALSE	FALSE	FALSE	FALSE	ciliary plasm	phosphatase activity	dephosphorylation
Tb927.6.1880	Q585M3	aspartyl-tRNA synthetase, putative	NA	0.0412357	0.119205	0.0731355	0.323942	0.149001	0.459204	0.182557	0.652539	-1.29	-0.85	0.992	0.586	0.875	0.436	-0.88	0.289	Tb927.6.1880	OG5_127227	cytoplasm(patchy), flagellar cytoplasm	Cytoplasm	12-60	FALSE	FALSE	FALSE	FALSE	FALSE	FALSE	FALSE	FALSE	aminoacyl-tRNA synthetase multienzyme complex	RNA binding	aspartyl-tRNA aminoacylation
Tb927.6.3020	Q583N2	hypothetical protein, conserved	NA	0.00621087	0.251774	0.682168	0.133546	0.704388	0.00073935	0.0904529	0.0921104	1.08	-0.362	0.127	0.538	-0.131	-1.45	0.673	-0.669	Tb927.6.3020	OG5_158016	ND	Nucleus	ND	FALSE	FALSE	FALSE	FALSE	FALSE	FALSE	FALSE	FALSE	ciliary plasm	N/A	N/A
Tb927.6.3150	Q583L9	Hydin	NA	0.112361	0.434232	0.875486	0.182354	0.803692	0.0298898	0.894771	0.152655	0.512	-0.218	-0.0432	0.425	-0.0767	-0.73	0.0447	-0.501	Tb927.6.3150	OG5_128968	axoneme, cytoplasm(reticulated, points)	Cytoplasm	1126-1139;1952-1961;2931-2941	FALSE	FALSE	FALSE	FALSE	FALSE	FALSE	FALSE	FALSE	axoneme	N/A	N/A
Tb927.6.3650	Q585W3	ADP-ribosylation factor-like protein 3C, putative	ARL3C	0.513089	0.652614	0.822635	0.895372	0.892667	0.297207	0.592097	0.997506	-0.338	0.207	0.103	0.0675	0.0692	0.545	-0.303	0.00176	ARL3C	OG5_148030	cytoplasm, nucleus, flagellar cytoplasm, basal body	Cytoplasm	ND	FALSE	FALSE	FALSE	FALSE	FALSE	FALSE	FALSE	FALSE	Golgi apparatus	GTP binding	cilium organization
Tb927.6.3740	Q585X3	heat shock 70 kDa protein, mitochondrial precursor, putative	MtHSP70A	0.792845	0.891231	0.256038	0.776236	0.911001	0.88823	0.340416	0.718061	-0.0678	-0.0316	0.268	-0.0734	0.0288	0.0363	0.274	0.102	MtHSP70A	OG5_126744	ND	Mitochondrion	624-654	FALSE	TRUE	FALSE	FALSE	FALSE	FALSE	FALSE	FALSE	cytoplasm	ATP binding	cellular response to unfolded protein
Tb927.6.3920	Q585Z0	hypothetical protein, conserved	NA	0.57258	0.628974	0.812842	0.246331	0.310019	0.893813	0.0885644	0.057638	-0.19	-0.145	-0.0709	0.397	-0.346	0.0447	-0.658	-0.744	Tb927.6.3920	OG5_151777	axoneme, cytoplasm(weak), nucleoplasm(weak)	Cytoplasm	135-145	FALSE	FALSE	FALSE	FALSE	FALSE	FALSE	FALSE	FALSE	axoneme	N/A	N/A
Tb927.6.410	Q581E9	hypothetical protein, conserved	NA	0.0517141	0.00011394	0.000137071	0.207408	0.000156033	0.0216139	0.000204533	0.00389932	0.824	1.83	1.79	0.513	1.98	1	2.1	1.46	Tb927.6.410	OG5_180294	ND	Cytoplasm	449-460;634-643	FALSE	FALSE	FALSE	FALSE	FALSE	FALSE	FALSE	FALSE	cilium	N/A	N/A
Tb927.6.4100	Q586A8	hypothetical protein, conserved	NA	0.682244	0.590244	0.468576	0.189561	0.330688	0.941399	0.319689	0.0467493	0.113	0.133	-0.18	-0.372	0.272	0.0202	0.305	0.644	Tb927.6.4100	OG5_144871	ND	Cytoplasm	15-131;156-225;261-281;306-350;369-400	FALSE	FALSE	FALSE	FALSE	FALSE	FALSE	FALSE	FALSE	ciliary basal body	N/A	posttranscriptional regulation of gene expression
Tb927.6.4280	Q586Z6	glyceraldehyde 3-phosphate dehydrogenase, glycosomal	GAPDH	0.780976	0.311306	0.476794	0.685003	0.57268	0.241421	0.237415	0.883553	0.07	-0.232	0.161	-0.102	-0.143	-0.302	0.334	-0.0403	GAPDH	OG5_126628	cytoplasm(patchy, points), nucleolus(25%)	Peroxisome	ND	FALSE	FALSE	FALSE	FALSE	FALSE	FALSE	FALSE	FALSE	cytoplasm	glyceraldehyde-3-phosphate dehydrogenase (NAD+) (phosphorylating) activity	glycolytic process
Tb927.6.4590	Q587C5	glutamyl-tRNA synthetase, putative	NA	0.304503	0.524452	0.224816	0.247727	0.203588	0.637443	0.317185	0.909127	-0.387	-0.212	0.412	0.438	0.484	0.175	-0.412	0.0462	Tb927.6.4590	OG5_128638	cytoplasm(25%), cytoplasm(reticulated, points, 75%), flagellar cytoplasm(25%), nuclear lumen(25%)	Cytoplasm	546-604	FALSE	FALSE	FALSE	FALSE	FALSE	FALSE	FALSE	FALSE	ciliary plasm	glutamine-tRNA ligase activity	glutaminyl-tRNA aminoacylation
Tb927.6.4670	Q587D3	MORN repeat-containing protein 1	MORN1	0.200771	0.17867	0.0318112	0.883901	0.230649	0.940329	0.407242	0.330548	-0.719	-0.678	1.14	-0.0797	-0.671	0.0408	0.501	-0.591	MORN1	OG5_128972	ND	Extracellular	ND	FALSE	FALSE	FALSE	FALSE	FALSE	FALSE	FALSE	FALSE	bilobe structure	N/A	endocytosis
Tb927.6.4770	Q587E3	protein mkt1, putative	MKT1	0.551153	0.146125	0.414148	0.19706	0.0395562	0.457076	0.026224	0.00511267	-0.34	-0.766	-0.419	0.754	-1.26	-0.426	-1.51	-2.02	MKT1	OG5_146830	cytoplasm(points, 75%)	Cytoplasm	65-74	FALSE	TRUE	FALSE	FALSE	FALSE	FALSE	FALSE	FALSE	cytoplasm	5'-flap endonuclease activity	DNA repair
Tb927.6.4970	Q586G9	serine/arginine-rich protein specific kinase SRPK, putative	NA	0.483825	0.016549	0.184247	0.251009	0.0411691	0.1091	0.551982	0.00707879	-0.589	-1.99	1.02	0.98	-1.84	-1.4	-0.546	-2.82	Tb927.6.4970	OG5_127107	cytoplasm(patchy)	Nucleus	116-141	FALSE	FALSE	FALSE	FALSE	FALSE	FALSE	FALSE	FALSE	cytoplasm	ATP binding	intracellular signal transduction
Tb927.6.4980	Q4FKG9	40S ribosomal protein S14	RPS14	0.410657	0.923893	0.222798	0.14486	0.169505	0.459267	0.00601085	0.931824	0.296	0.0304	0.399	-0.539	-0.506	-0.266	1.23	0.0334	RPS14	OG5_126681	cytoplasm(reticulated, patchy), nucleolus	Cytoplasm	134-143	FALSE	FALSE	FALSE	FALSE	FALSE	FALSE	FALSE	FALSE	cytoplasm	mRNA 5'-UTR binding	maturation of SSU-rRNA from tricistronic rRNA transcript (SSU-rRNA, 5.8S rRNA, LSU-rRNA)
Tb927.6.5030	Q586H5	Component of motile flagella protein 46	CMF46	0.427436	0.300895	0.220408	0.541085	0.0651614	0.8881	0.0327762	0.030842	-0.538	-0.633	-0.755	0.413	-1.32	-0.0944	-1.71	-1.73	CMF46	OG5_130416	axoneme(75%), cytoplasm(points, 75%)	Cytoplasm	ND	FALSE	FALSE	FALSE	FALSE	FALSE	TRUE	FALSE	FALSE	axoneme	N/A	cilium-dependent cell motility
Tb927.6.5040	Q586H6	ribosomal protein L15, putative	NA	0.912392	0.353702	0.822391	0.248645	0.839277	0.468106	0.256366	0.21874	0.0505	0.387	-0.0922	0.543	-0.0932	0.336	-0.584	-0.636	Tb927.6.5040	OG5_127033	ND	Cytoplasm	59-69	FALSE	FALSE	FALSE	FALSE	FALSE	FALSE	FALSE	FALSE	cytosolic large ribosomal subunit	RNA binding	cytoplasmic translation
Tb927.6.5070	Q586H9	Cytoskeleton-associated protein 52 kDa	CAP52	0.575035	0.927482	0.915304	0.13165	0.306495	0.630928	0.0568283	0.0289536	0.384	0.0554	0.0647	-1.07	0.709	-0.328	1.52	1.78	CAP52	OG5_150714	ND	Nucleus	ND	FALSE	FALSE	FALSE	FALSE	FALSE	FALSE	FALSE	FALSE	cortical cytoskeleton	N/A	mitotic cleavage furrow formation
Tb927.7.1040	Q57VV0	40S ribosomal protein S16, putative	NA	0.67343	0.0140052	0.855707	0.000370758	0.000530973	0.056732	0.0013078	0.867622	-0.2	-1.17	0.0771	-2.15	-2.07	-0.965	2.03	0.0865	Tb927.7.1040	OG5_126930	ND	Cytoplasm	ND	FALSE	FALSE	FALSE	FALSE	FALSE	FALSE	FALSE	FALSE	cytoplasm	RNA binding	maturation of SSU-rRNA from tricistronic rRNA transcript (SSU-rRNA, 5.8S rRNA, LSU-rRNA)
Tb927.7.1060	Q57VV2	ISWI complex protein	FYRP	0.0700076	0.522038	0.143924	0.260899	0.915753	0.191412	0.132825	0.262346	-1.22	-0.365	0.86	0.728	-0.067	0.853	-1.09	-0.795	FYRP	OG5_148724	ND	Nucleus	177-186;195-205	FALSE	FALSE	FALSE	FALSE	FALSE	FALSE	FALSE	FALSE	ISWI-type complex	transcription cis-regulatory region binding	N/A
Tb927.7.1740	Q57V35	60S ribosomal protein L7, putative	NA	0.749644	0.790071	0.643678	0.314134	0.210301	0.578884	0.402084	0.809914	-0.111	0.0828	0.144	0.356	0.448	0.194	-0.323	0.0916	Tb927.7.1740	OG5_126953	ND	Cytoplasm	25-44	FALSE	FALSE	FALSE	FALSE	FALSE	FALSE	FALSE	FALSE	cytoplasm	RNA binding	maturation of LSU-rRNA from tricistronic rRNA transcript (SSU-rRNA, 5.8S rRNA, LSU-rRNA)
Tb927.7.1920	Q57V18	paraflagellar rod component, putative	PFC5	0.664521	0.464397	0.886641	0.774556	0.90555	0.821675	0.589332	0.878048	-0.542	-0.823	0.159	0.357	0.148	-0.281	-0.74	-0.209	PFC5	OG5_158354	paraflagellar rod, cytoplasm(weak)	Cytoplasm	ND	FALSE	FALSE	FALSE	FALSE	FALSE	FALSE	FALSE	FALSE	SCF ubiquitin ligase complex	N/A	SCF-dependent proteasomal ubiquitin-dependent protein catabolic process
Tb927.7.2330	Q57XP1	Protein of unknown function (DUF1663), putative	NA	0.203566	0.420372	0.143886	0.893947	0.0326581	0.0565655	0.939158	0.0607935	-0.606	0.338	0.63	0.0618	1.08	0.944	-0.0387	1.01	Tb927.7.2330	OG5_150181	ND	Nucleus	11-30;489-498	FALSE	FALSE	FALSE	FALSE	FALSE	FALSE	FALSE	FALSE	nuclear envelope	N/A	N/A
Tb927.7.2340	Q57XN7	40S ribosomal protein S15, putative	NA	0.778652	0.292894	0.47801	0.00399795	0.00498922	0.226755	0.0141459	0.921149	0.16	-0.545	-0.363	-1.91	-1.85	-0.704	1.71	0.0615	Tb927.7.2340	OG5_126687	nucleolus, cytoplasm	Cytoplasm	ND	FALSE	FALSE	FALSE	FALSE	FALSE	FALSE	FALSE	FALSE	cytoplasm	structural constituent of ribosome	ribosomal small subunit assembly
Tb927.7.2390	Q57XN5	Tripartite attachment complex protein 102	TAC102	0.811363	0.583173	0.179978	0.522936	0.793392	0.468162	0.148586	0.413963	-0.065	0.134	0.337	-0.175	0.0714	0.199	0.447	0.246	TAC102	OG5_144886	mitochondrion	Nucleus	607-811	FALSE	FALSE	FALSE	FALSE	FALSE	FALSE	FALSE	FALSE	mitochondrial protein-containing complex	N/A	obsolete mitochondrial DNA inheritance
Tb927.7.2450	Q57XM9	SUMO-interacting motif-containing protein	NA	0.112552	0.38779	0.237754	0.140884	0.36685	0.386048	0.278488	0.575945	0.516	0.243	0.336	0.476	0.284	-0.273	0.377	-0.191	Tb927.7.2450	OG5_144673	ND	Nucleus	3-14;102-131	FALSE	FALSE	FALSE	FALSE	FALSE	FALSE	TRUE	FALSE	nuclear lumen	N/A	regulation of histone H3-K36 trimethylation
Tb927.7.2650	Q57XK9	Cytoskeleton associated protein 51V	CAP51V	0.749956	0.495467	0.633953	0.194117	0.437398	0.357631	0.0726923	0.614755	0.108	-0.209	0.145	-0.454	-0.266	-0.317	0.708	0.188	CAP51V	OG5_139856	cytoplasm	Nucleus	225-248	TRUE	FALSE	FALSE	FALSE	FALSE	FALSE	FALSE	FALSE	ciliary plasm	N/A	cell morphogenesis
Tb927.7.270	Q57U27	ribosome production factor 2	RPF2	0.0742432	0.913957	0.0883982	0.262342	0.652475	0.0620503	0.204253	0.52889	-0.805	0.0411	0.684	0.488	0.192	0.846	-0.609	-0.296	RPF2	OG5_127909	ND	Nucleus	ND	FALSE	FALSE	FALSE	FALSE	FALSE	FALSE	FALSE	FALSE	nucleolus	5S rRNA binding	maturation of LSU-rRNA from tricistronic rRNA transcript (SSU-rRNA, 5.8S rRNA, LSU-rRNA)
Tb927.7.2730	Q57Y83	leucine-rich repeat protein (LRRP), putative	NA	0.0327405	0.31996	0.518608	0.658941	0.296033	0.170699	0.0614954	0.571797	-0.99	-0.386	0.248	0.189	0.454	0.604	-0.931	0.266	Tb927.7.2730	OG5_147503	paraflagellar rod, cytoplasm(reticulated)	Nucleus	ND	FALSE	FALSE	FALSE	FALSE	FALSE	FALSE	FALSE	FALSE	axoneme	N/A	N/A
Tb927.7.2820	Q57YA3	histone H2A, putative	NA	0.0920908	0.880979	0.0307687	0.172645	0.192703	0.0721301	0.332952	0.951034	0.83	-0.0627	-0.986	-0.66	-0.629	-0.893	0.505	0.0315	Tb927.7.2820	OG5_126570	nuclear lumen(points), cytoplasm(points)	Cytoplasm	ND	FALSE	FALSE	FALSE	FALSE	FALSE	FALSE	FALSE	FALSE	nucleoplasm	DNA binding	chromatin organization
Tb927.7.3070	Q57YB7	UAA transporter family, putative	NA	0.600008	0.379952	0.0194157	0.237611	0.340326	0.199073	0.600767	0.825355	-0.172	0.26	0.756	0.396	0.317	0.432	0.188	-0.079	Tb927.7.3070	OG5_127044	flagellum attachment zone, cytoplasm(patchy), nucleus(ring)	Cell_membrane	441-451	FALSE	FALSE	FALSE	FALSE	FALSE	FALSE	FALSE	FALSE	ciliary plasm	UDP-galactose transmembrane transporter activity	UDP-galactose transmembrane transport
Tb927.7.3330	Q57WE8	Flagellar attachment zone protein 10	FAZ10	0.296212	0.0753027	0.320958	0.939533	0.795368	0.0139704	0.828406	0.866821	-0.705	1.12	0.598	0.0502	0.172	1.82	-0.157	0.122	FAZ10	OG5_126585	plasma membrane	Golgi_apparatus	728-749;3952-3961;4307-4318	FALSE	FALSE	FALSE	FALSE	FALSE	FALSE	FALSE	FALSE	cell tip	mRNA binding	cell morphogenesis
Tb927.7.3440	Q57WF9	Cytoskeleton-associated protein 27 kDa	CAP27	0.0179093	0.0220878	0.0610003	0.0367805	0.0581239	0.711022	0.206952	0.827217	-1.59	-1.37	1.08	-1.37	-1.23	0.225	0.862	0.145	CAP27	OG5_145968	cortical cytoskeleton(anterior, middle)	Cell_membrane	121-246	FALSE	FALSE	FALSE	FALSE	FALSE	FALSE	FALSE	FALSE	cortical cytoskeleton	calcium ion binding	mitotic cleavage furrow ingression
Tb927.7.3550	Q57WH0	cytoskeleton associated protein, putative	WCB	0.641842	0.184125	0.255344	0.577802	0.170305	0.452017	0.39269	0.437782	0.123	0.323	0.275	0.148	0.374	0.2	0.25	0.226	WCB	OG5_142692	cortical cytoskeleton(anterior, middle, 50%)	Nucleus	367-376;591-610;649-690;821-961;983-1005	TRUE	FALSE	FALSE	FALSE	FALSE	FALSE	FALSE	FALSE	cortical cytoskeleton	protein-containing complex binding	cell morphogenesis
Tb927.7.3920	Q57UM2	hypothetical protein, conserved	NA	0.0401638	0.372232	0.394413	0.647253	0.205071	0.173328	0.098031	0.445025	-1.31	-0.478	0.455	0.271	0.77	0.831	-1.12	0.499	Tb927.7.3920	OG5_154540	ND	Nucleus	142-151	FALSE	FALSE	FALSE	FALSE	FALSE	FALSE	FALSE	FALSE	axoneme	N/A	N/A
Tb927.7.3940	Q57UM4	mitochondrial carrier protein	MCP16	0.00643883	0.841916	0.307403	0.219592	0.68786	0.00926282	0.396605	0.143876	-1.66	-0.0947	0.494	-0.67	0.214	1.57	-0.499	0.883	MCP16	OG5_148407	acidocalcisome, cytoplasm	Mitochondrion	ND	FALSE	TRUE	FALSE	FALSE	FALSE	FALSE	FALSE	FALSE	mitochondrial inner membrane	N/A	transport
Tb927.7.4060	Q57UN6	cysteine peptidase, Clan CA, family C2, putative	NA	0.563735	0.0467739	0.684283	0.436713	0.181613	0.196257	0.884452	0.589837	0.231	0.762	0.145	0.313	0.55	0.531	0.0635	0.237	Tb927.7.4060	OG5_138263	cytoplasm(50%), flagellar cytoplasm(50%), nucleoplasm(50%), flagellar tip(50%)	Cytoplasm	ND	FALSE	FALSE	FALSE	FALSE	FALSE	FALSE	FALSE	FALSE	ciliary plasm	N/A	N/A
Tb927.7.4840	Q57XA0	hypothetical protein, conserved	NA	0.889386	0.128	0.442631	0.392218	0.416241	0.212968	0.776046	0.967761	-0.102	-1.04	0.508	0.634	0.602	-0.937	-0.228	-0.0324	Tb927.7.4840	OG5_161829	ND	Cytoplasm	ND	FALSE	FALSE	FALSE	FALSE	FALSE	FALSE	FALSE	FALSE	axoneme	N/A	N/A
Tb927.7.4910	Q57XA7	hypothetical protein, conserved	NA	0.19754	0.917924	0.560219	0.0617568	0.588496	0.169942	0.898666	0.0332842	0.852	-0.0591	0.336	1.28	-0.349	-0.911	-0.0895	-1.63	Tb927.7.4910	OG5_148275	axoneme	Plastid	ND	FALSE	FALSE	FALSE	FALSE	FALSE	FALSE	FALSE	FALSE	axoneme	N/A	N/A
Tb927.7.5000	Q57ZI7	60S ribosomal protein L19, putative	NA	0.048574	0.0623639	0.413242	0.262027	0.498427	0.732849	0.833323	0.672252	-1.01	-0.843	0.352	-0.545	-0.324	0.162	-0.11	0.221	Tb927.7.5000	OG5_126940	ND	Nucleus	96-108;135-260	FALSE	FALSE	FALSE	FALSE	FALSE	FALSE	FALSE	FALSE	cytoplasm	RNA binding	ribosome biogenesis
Tb927.7.5170	Q57ZH2	60S ribosomal protein L25	NA	0.0104476	0.157082	0.276583	0.800275	0.685955	0.129206	0.0647729	0.889492	-1.63	-0.738	0.559	0.142	0.228	0.889	-1.21	0.0856	Tb927.7.5170	OG5_126659	ND	Cytoplasm	1-53	FALSE	FALSE	FALSE	FALSE	FALSE	FALSE	FALSE	FALSE	cytoplasm	RNA binding	ribosomal large subunit assembly
Tb927.7.5320	Q57ZF7	hypothetical protein, conserved	NA	0.0516725	0.917013	0.142331	0.576687	0.259594	0.043245	0.883752	0.132998	-1.16	0.0518	0.758	-0.312	0.641	1.21	-0.089	0.953	Tb927.7.5320	OG5_167763	ND	Nucleus	116-125;501-510	FALSE	FALSE	FALSE	FALSE	FALSE	FALSE	TRUE	FALSE	kinetoplast	N/A	N/A
Tb927.7.5340	Q57ZF5	cAMP response protein 3	CARP3	0.0137123	0.00238093	0.0878795	0.328841	0.324612	0.634416	0.0658967	0.0844814	-0.672	-0.788	0.392	0.242	-0.244	-0.116	-0.522	-0.486	CARP3	OG5_161902	ND	Nucleus	84-95;291-300	TRUE	FALSE	FALSE	FALSE	FALSE	FALSE	FALSE	FALSE	ciliary membrane	N/A	N/A
Tb927.7.6360	Q582M3	histone H2A variant Z	H2AZ	0.480211	0.334679	0.388892	0.486619	0.309534	0.127544	0.565645	0.761106	0.26	-0.32	-0.285	-0.256	-0.378	-0.58	0.231	-0.122	H2AZ	OG5_127916	nucleoplasm	Nucleus	23-74	FALSE	FALSE	FALSE	FALSE	FALSE	FALSE	FALSE	FALSE	nucleoplasm	DNA binding	chromatin organization
Tb927.7.6640	Q57Y65	hypothetical protein, conserved	NA	0.0369231	0.452872	0.621482	0.568668	0.938055	0.129018	0.0429734	0.65213	-1.19	-0.356	0.233	0.301	0.0409	0.832	-1.26	-0.261	Tb927.7.6640	OG5_148041	ND	Cytoplasm	34-44;514-524;1005-1014;1200-1318	TRUE	FALSE	FALSE	FALSE	FALSE	FALSE	FALSE	FALSE	axoneme	N/A	posttranscriptional regulation of gene expression
Tb927.7.6860	B3GVE0	expression site-associated gene 5 (ESAG5) protein, putative	NA	0.486714	0.0272714	0.167381	0.663596	0.251096	0.159182	0.362159	0.503358	-0.452	-1.39	0.823	-0.281	-0.757	-0.94	0.652	-0.476	Tb927.7.6860	OG5_185141	ND	Endoplasmic_reticulum	2-11	FALSE	FALSE	FALSE	FALSE	FALSE	FALSE	FALSE	FALSE	N/A	N/A	N/A
Tb927.7.6950	Q57XR5	hypothetical protein, conserved	NA	0.23308	0.111581	0.177165	0.239507	0.990723	0.789785	0.290329	0.285468	-0.902	-1.1	0.92	0.889	0.00857	-0.197	-0.871	-0.881	Tb927.7.6950	OG5_162352	ND	Cytoplasm	ND	FALSE	FALSE	FALSE	FALSE	FALSE	FALSE	FALSE	FALSE	axoneme	N/A	N/A
Tb927.7.710	Q57VR7	heat shock 70 kDa protein, putative	HSP70	0.0156953	0.23872	0.298215	0.324896	0.371153	0.122553	0.0227795	0.93124	-1.64	-0.657	0.577	0.609	0.551	0.98	-1.67	-0.0575	HSP70	OG5_126588	cell tip(anterior), cytoplasm, flagellar cytoplasm	Cytoplasm	ND	FALSE	FALSE	FALSE	FALSE	FALSE	FALSE	FALSE	FALSE	axoneme	ATP binding	cellular response to unfolded protein
Tb927.7.7100	Q57XT0	hypothetical protein	NA	0.0197191	0.653949	0.18513	0.197258	0.597623	0.00875215	0.0254649	0.470218	-1.21	0.189	0.575	0.624	0.249	1.4	-1.26	-0.375	Tb927.7.7100	OG5_185218	ND	Nucleus	109-119;407-434;647-656;1157-1224	FALSE	FALSE	FALSE	FALSE	FALSE	FALSE	FALSE	FALSE	N/A	N/A	N/A
Tb927.8.1200	D6XMU9	vacuolar-type Ca2+-ATPase 2	TbA2	0.0365169	0.213076	0.216941	0.814569	0.916392	0.272461	0.224554	0.905726	-0.851	-0.43	0.426	0.0881	0.0394	0.421	-0.513	-0.0487	TbA2	OG5_126645	ND	Cell_membrane	ND	FALSE	FALSE	FALSE	FALSE	FALSE	FALSE	FALSE	FALSE	intracellular membrane-bounded organelle	ATP binding	cell growth
Tb927.8.1270	Q57VM8	Nucleolar protein 54	NOP54	0.15756	0.926122	0.000813327	0.169104	0.118044	0.136912	0.455889	0.84726	-1.19	0.0675	3.02	1.16	1.33	1.26	0.672	0.172	NOP54	OG5_145761	ND	Nucleus	382-391	FALSE	FALSE	FALSE	FALSE	FALSE	FALSE	FALSE	FALSE	nucleolus	N/A	N/A
Tb927.8.1330	Q57VM1	60S ribosomal protein L7a, putative	NA	0.36182	0.315731	0.256048	0.0834485	0.64792	0.990536	0.0921958	0.223312	0.333	0.328	-0.374	0.657	0.165	-0.00426	-0.698	-0.492	Tb927.8.1330	OG5_126938	cytoplasm(patchy), nucleolus	Cytoplasm	27-37	FALSE	FALSE	FALSE	FALSE	FALSE	FALSE	FALSE	FALSE	cytoplasm	RNA binding	maturation of LSU-rRNA
Tb927.8.1540	Q580G9	hypothetical protein, conserved	NA	0.222176	0.803503	0.677641	0.157757	0.550208	0.311298	0.882308	0.435491	0.423	0.0752	0.126	0.494	0.203	-0.348	0.0547	-0.291	Tb927.8.1540	OG5_151456	ND	Cytoplasm	164-174;544-553;618-637	FALSE	FALSE	FALSE	FALSE	FALSE	FALSE	FALSE	FALSE	cilium	N/A	N/A
Tb927.8.1550	Q580G8	paraflagellar rod component, putative	PFC3	0.486029	0.995679	0.610253	0.73183	0.185323	0.48308	0.459996	0.357231	0.715	-0.00493	0.466	0.349	1.39	-0.72	0.832	1.04	PFC3	OG5_151455	paraflagellar rod	Cytoplasm	610-619	FALSE	FALSE	FALSE	FALSE	FALSE	FALSE	FALSE	FALSE	cytoplasm	N/A	N/A
Tb927.8.2250	Q57XG4	Fungal tRNA ligase phosphodiesterase domain containing protein, putative	NA	0.466952	0.0914446	0.692757	0.0420235	0.0169571	0.0326303	0.113583	0.000471611	-0.326	0.706	0.157	-0.974	1.18	1.03	0.805	2.15	Tb927.8.2250	OG5_146055	endocytic, cytoplasm(weak)	Cytoplasm	85-96	FALSE	FALSE	FALSE	FALSE	FALSE	FALSE	FALSE	FALSE	cytoplasm	double-stranded DNA binding	DNA repair
Tb927.8.2260	Q57XG1	Present in the outer mitochondrial membrane proteome 39-2	POMP39-2	0.0612082	0.970522	6.37231e-05	0.570872	0.00214499	0.0651064	0.00595982	0.0014287	-1.01	-0.0168	2.48	-0.289	1.86	0.995	1.76	2.15	POMP39-2	OG5_206783	ND	Cell_membrane	ND	FALSE	FALSE	FALSE	FALSE	FALSE	FALSE	FALSE	FALSE	axoneme	N/A	N/A
Tb927.8.3060	Q57W67	metallo-peptidase, Clan MF, Family M17	NA	0.48497	0.408794	0.189772	0.0598602	0.224205	0.161092	0.183988	0.491515	0.23	-0.245	-0.396	-0.657	-0.408	-0.475	0.491	0.248	Tb927.8.3060	OG5_127293	ND	Mitochondrion	594-668	FALSE	FALSE	FALSE	FALSE	FALSE	FALSE	FALSE	FALSE	cortical cytoskeleton	aminopeptidase activity	proteolysis
Tb927.8.3250	Q57YY8	dynein heavy chain, putative	NA	0.691129	0.93624	0.860222	0.920245	0.184553	0.744221	0.678222	0.257377	-0.431	-0.0774	-0.17	-0.108	-1.48	0.354	-0.493	-1.37	Tb927.8.3250	OG5_126558	axoneme	Cytoplasm	3411-3420;4379-4390	FALSE	FALSE	FALSE	FALSE	FALSE	TRUE	FALSE	FALSE	axoneme	dynein intermediate chain binding	microtubule-based movement
Tb927.8.3530	Q57YW0	glycerol-3-phosphate dehydrogenase [NAD+], glycosomal	G3PDH	0.559277	0.0482194	0.629305	0.517527	0.970778	0.202989	0.650521	0.576391	-0.273	-0.883	0.202	-0.303	-0.017	-0.609	0.232	0.286	G3PDH	OG5_126704	ND	Mitochondrion	250-259	FALSE	FALSE	FALSE	FALSE	FALSE	FALSE	FALSE	FALSE	cytosol	glycerol-3-phosphate dehydrogenase [NAD+] activity	NADH oxidation
Tb927.8.3720	Q580Z2	SUMO-interacting motif-containing protein	NA	0.390198	0.096188	0.266696	0.6816	0.409504	0.491052	0.808058	0.699848	-0.275	-0.494	0.321	0.13	0.264	-0.219	-0.0841	0.134	Tb927.8.3720	OG5_162362	cytoplasm(points, weak)	Cell_membrane	268-338	FALSE	FALSE	FALSE	FALSE	FALSE	FALSE	FALSE	FALSE	N/A	N/A	N/A
Tb927.8.4240	Q57W11	hypothetical protein, conserved	NA	0.477513	0.144005	0.0334857	0.318428	0.186041	0.0527563	0.760132	0.75026	-0.504	0.955	1.45	0.714	0.96	1.46	0.235	0.246	Tb927.8.4240	OG5_143834	kinetoplast(points)	Mitochondrion	1528-1598;1632-1652	FALSE	FALSE	FALSE	FALSE	FALSE	FALSE	TRUE	FALSE	ciliary basal body	N/A	N/A
Tb927.8.4320	Q57W03	hypothetical protein, conserved	NA	0.123707	0.365919	0.228572	0.609003	0.118178	0.43644	0.361053	0.315475	-1.09	-0.556	0.749	0.348	1.11	0.533	-0.688	0.759	Tb927.8.4320	OG5_148192	ND	Nucleus	472-504;520-531;563-610;646-670;694-708;801-901;1033-1057	FALSE	FALSE	FALSE	FALSE	FALSE	TRUE	FALSE	FALSE	ciliary plasm	N/A	N/A
Tb927.8.4330	D6XLG8	small GTP-binding protein Rab11	RAB11	0.186295	0.737465	0.911237	0.477621	0.545903	0.296897	0.498605	0.920944	-0.887	-0.195	-0.0648	-0.466	-0.395	0.692	-0.486	0.0707	RAB11	OG5_126971	ND	Golgi_apparatus	ND	FALSE	TRUE	FALSE	FALSE	FALSE	FALSE	FALSE	FALSE	contractile vacuole	GTP binding	endocytosis
Tb927.8.4450	Q57VZ0	RNA-binding protein, putative	RBP11	0.0352028	0.0896537	0.108028	0.554569	0.207949	0.4965	0.866398	0.525006	-0.732	-0.513	0.483	-0.19	-0.415	0.22	-0.0591	-0.225	RBP11	OG5_128388	nucleolus	Nucleus	55-68;98-135;350-359;360-373	FALSE	FALSE	FALSE	FALSE	FALSE	FALSE	FALSE	FALSE	nucleolus	RNA binding	RNA processing
Tb927.8.4580	Q57UZ3	Basal body protein	BBP58	0.411826	0.946864	0.237158	0.748249	0.144354	0.379933	0.95067	0.284857	-0.878	0.063	1.15	0.34	1.6	0.941	-0.0716	1.26	BBP58	OG5_130267	ND	Nucleus	145-176;337-347;363-382;418-430	FALSE	FALSE	FALSE	FALSE	FALSE	FALSE	FALSE	FALSE	axoneme	N/A	N/A
Tb927.8.4640	Q57UY7	Component of motile flagella 19	CMF19	0.462371	0.572422	0.465831	0.178361	0.312521	0.223694	0.191903	0.741425	-0.585	0.4	0.519	1.1	0.811	0.985	-1.16	-0.286	CMF19	OG5_129990	axoneme	Nucleus	162-171;299-308	FALSE	FALSE	FALSE	FALSE	FALSE	FALSE	FALSE	FALSE	axoneme	N/A	negative regulation of microtubule depolymerization
Tb927.8.4780	Q57UX4	Flagellar Member 3	FLAM3	0.853588	0.431607	0.782744	0.5286	0.211818	0.600228	0.527584	0.0958764	-0.132	-0.509	0.177	-0.454	0.919	-0.377	0.499	1.37	FLAM3	OG5_145908	flagellum attachment zone, cytoplasm(reticulated, weak)	Cytoplasm	1547-1556;2207-2238;2774-2805;3341-3372;3710-3720;3992-4025	FALSE	FALSE	FALSE	FALSE	FALSE	FALSE	FALSE	FALSE	cilium	N/A	motile cilium assembly
Tb927.8.4970	Q57UH2	Paraflagellar rod protein 2-1	PFR2-1	0.922331	0.780275	0.29855	0.529958	0.176579	0.878964	0.842274	0.489	-0.0682	-0.175	0.663	0.442	0.976	-0.106	0.152	0.534	PFR2-1	OG5_130385	paraflagellar rod	Cytoplasm	ND	FALSE	FALSE	FALSE	FALSE	FALSE	FALSE	FALSE	FALSE	ciliary plasm	N/A	cilium-dependent cell motility
Tb927.8.5050	Q57UH7	OTU-like cysteine protease, putative	NA	0.945412	0.0228423	0.943176	0.239933	0.158449	0.0336077	0.279631	0.81442	-0.0189	0.618	0.0176	0.332	0.404	0.637	-0.334	0.071	Tb927.8.5050	OG5_135233	ND	Nucleus	546-565	FALSE	FALSE	FALSE	FALSE	FALSE	FALSE	FALSE	FALSE	ciliary plasm	thiol-dependent deubiquitinase	protein deubiquitination
Tb927.8.5440	Q57UL8	flagellar calcium-binding 24 kDa protein	Tb-24	0.251378	0.497323	0.000140734	0.438601	0.51887	0.575853	2.91041e-05	0.203993	0.486	0.253	1.87	-0.324	0.269	-0.233	2.68	0.592	Tb-24	OG5_133600	ND	Cell_membrane	ND	FALSE	FALSE	FALSE	FALSE	FALSE	FALSE	FALSE	FALSE	ciliary plasm	calcium ion binding	N/A
Tb927.8.5490	Q57X33	Nucleolar protein,Nop52, putative	NA	0.665308	0.903703	0.286819	0.558514	0.0679732	0.58957	0.963419	0.0336818	-0.163	0.0406	0.365	0.221	-0.728	0.203	-0.0188	-0.948	Tb927.8.5490	OG5_142719	cytoplasm(reticulated)	Nucleus	123-142	FALSE	FALSE	FALSE	FALSE	FALSE	FALSE	FALSE	FALSE	cytoplasm	N/A	rRNA processing
Tb927.8.6150	Q57YL6	40S ribosomal protein S8, putative	NA	0.22162	0.798044	0.920901	0.435849	0.997549	0.31345	0.612837	0.474398	-0.533	-0.0972	-0.0377	-0.334	0.0013	0.436	-0.236	0.336	Tb927.8.6150	OG5_127039	ND	Cytoplasm	122-143	FALSE	FALSE	FALSE	FALSE	FALSE	FALSE	FALSE	FALSE	cytoplasm	structural constituent of ribosome	maturation of SSU-rRNA from tricistronic rRNA transcript (SSU-rRNA, 5.8S rRNA, LSU-rRNA)
Tb927.8.6180	Q57YL9	60S ribosomal protein L26, putative	NA	0.254228	0.952786	0.548535	0.595614	0.404302	0.234297	0.931741	0.220923	0.59	-0.0267	-0.273	0.269	-0.427	-0.616	0.0474	-0.696	Tb927.8.6180	OG5_126931	cytoplasm(patchy)	Cytoplasm	ND	FALSE	FALSE	FALSE	FALSE	FALSE	FALSE	FALSE	FALSE	ciliary plasm	RNA binding	cytoplasmic translation
Tb927.8.6240	Q57YM5	STOP axonemal protein	SAXO1	0.70537	0.271149	0.948414	0.0590318	0.246786	0.533488	0.164087	0.453674	0.322	0.854	0.0491	1.71	1.01	0.533	-1.34	-0.704	SAXO1	OG5_134118	axoneme	Nucleus	198-207	FALSE	FALSE	FALSE	FALSE	FALSE	FALSE	FALSE	FALSE	axoneme	microtubule binding	microtubule anchoring
Tb927.8.6660	Q57TU7	paraflagellar rod component, putative	PFC1	0.126526	0.369736	0.0971129	0.0806837	0.0100387	0.44004	0.244099	0.3379	-0.66	-0.337	-0.646	-0.764	-1.21	0.323	-0.541	-0.442	PFC1	OG5_148678	paraflagellar rod	Nucleus	275-306	FALSE	FALSE	FALSE	FALSE	FALSE	FALSE	FALSE	FALSE	paraflagellar rod	N/A	N/A
Tb927.8.7100	Q57YR7	acetyl-CoA carboxylase	ACC	0.116356	0.402345	0.00935794	0.139079	0.826519	0.0280962	0.0230113	0.239887	-0.405	0.187	-0.651	-0.38	-0.0541	0.592	-0.676	0.326	ACC	OG5_127493	cytoplasm(patchy, 50%), cytoplasm(weak, 50%)	Cytoplasm	1311-1321	FALSE	TRUE	FALSE	FALSE	FALSE	FALSE	FALSE	FALSE	biotin carboxylase complex	ATP binding	fatty acid biosynthetic process
Tb927.8.7410	Q57YU3	calreticulin, putative	NA	0.684092	0.867534	0.447281	0.378325	0.62736	0.795995	0.576849	0.219966	0.805	0.294	-1.35	-1.76	0.961	-0.51	1.21	2.72	Tb927.8.7410	OG5_129181	ND	Endoplasmic_reticulum	351-395	FALSE	FALSE	FALSE	FALSE	FALSE	FALSE	FALSE	FALSE	endoplasmic reticulum	calcium ion binding	endoplasmic reticulum unfolded protein response
Tb927.8.8330	Q57WJ7	calpain, putative	CAP5.5V	0.455221	0.399662	0.365132	0.479079	0.541917	0.144432	0.479262	0.23716	-0.269	0.272	0.293	-0.254	0.219	0.54	0.279	0.473	CAP5.5V	OG5_139833	pellicular membrane(50%)	Cell_membrane	1-83;778-862	FALSE	FALSE	TRUE	FALSE	FALSE	FALSE	FALSE	FALSE	cytoplasm	calcium-dependent cysteine-type endopeptidase activity	cell morphogenesis
Tb927.8.890	D6XMQ7	Ras-related protein Rab1A	Rab1A	0.490971	0.959906	0.305208	0.940855	0.379855	0.519013	0.879719	0.460585	0.248	0.0161	-0.334	-0.0265	-0.318	-0.232	-0.0592	-0.291	Rab1A	OG5_127310	endocytic, cytoplasm(weak)	Golgi_apparatus	ND	FALSE	TRUE	FALSE	FALSE	FALSE	FALSE	FALSE	FALSE	ciliary pocket	GTPase activity	intracellular protein transport
Tb927.9.10310	Q38DX9	mitochondrial carrier protein 11	MCP11	0.891087	0.535598	0.30576	0.758954	0.143157	0.490839	0.656279	0.277557	0.13	-0.531	-0.889	-0.293	-1.45	-0.662	-0.466	-1.16	MCP11	OG5_127220	mitochondrion, kinetoplast(strong)	Mitochondrion	ND	FALSE	FALSE	FALSE	FALSE	FALSE	FALSE	FALSE	FALSE	cytoplasm	inorganic phosphate transmembrane transporter activity	cell morphogenesis
Tb927.9.10770	Q38DU2	polyadenylate-binding protein 2	PABP2	0.160953	0.66944	0.00155338	0.974454	0.0101182	0.0823477	0.0924576	0.0179069	0.414	-0.109	-0.977	-0.00913	-0.83	-0.524	-0.554	-0.821	PABP2	OG5_126795	rna granule	Cytoplasm	260-285;389-400;419-442	FALSE	TRUE	FALSE	FALSE	FALSE	FALSE	FALSE	FALSE	P-body	RNA binding	RNA processing
Tb927.9.10790	Q38DU1	hypothetical protein	NA	0.0727295	0.56398	0.00988846	0.137263	0.870121	0.180192	0.449289	0.219124	-0.962	-0.262	1.32	0.782	0.0826	0.7	-0.423	-0.699	Tb927.9.10790	OG5_167793	ND	Nucleus	ND	TRUE	FALSE	FALSE	FALSE	FALSE	FALSE	FALSE	FALSE	cortical cytoskeleton	N/A	N/A
Tb927.9.10920	Q38DT1	kinetoplastid kinetochore protein 3	KKT3	0.694115	0.126603	0.0121607	0.324098	0.599205	0.084759	0.0968229	0.665341	0.25	-0.905	1.6	0.637	0.335	-1.16	1.21	-0.302	KKT3	OG5_151836	nucleoplasm(points)	Nucleus	429-473	FALSE	FALSE	FALSE	FALSE	FALSE	FALSE	FALSE	FALSE	kinetochore	ATP binding	cell population proliferation
Tb927.9.11000	Q3S1K6	NA	NA	0.0785841	0.677504	0.349346	0.548111	0.0453814	0.03888	0.711069	0.0222726	-0.906	0.182	0.414	-0.294	1.05	1.09	-0.198	1.34	Tb927.9.11000	OG5_127616	cytoplasm(50%), flagellar cytoplasm(50%), nucleoplasm(50%), cytoplasm(50%, reticulated, weak)	Golgi_apparatus	185-194	FALSE	TRUE	FALSE	FALSE	FALSE	FALSE	FALSE	FALSE	ciliary plasm	GTPase activity	small GTPase mediated signal transduction
Tb927.9.11270	Q38DP9	t- complex protein 1 (eta subunit), putative	TCP-1-eta	0.413742	0.760237	0.0446182	0.346703	0.109042	0.28116	0.0754219	0.0278262	0.407	-0.135	-0.952	0.47	-0.826	-0.542	-1.02	-1.3	TCP-1-eta	OG5_127782	cytoplasm(patchy)	Cytoplasm	401-410;532-542	FALSE	TRUE	FALSE	FALSE	FALSE	FALSE	FALSE	FALSE	chaperonin-containing T-complex	unfolded protein binding	protein folding
Tb927.9.11380	Q38DP2	60S ribosomal protein L23, putative	NA	0.513042	0.410185	0.0256357	0.0271544	0.0271299	0.931051	0.000224577	0.999666	0.182	0.206	0.605	-0.668	-0.668	0.0239	1.46	-0.000127	Tb927.9.11380	OG5_126678	cytoplasm(points), nucleolus	Cytoplasm	ND	FALSE	FALSE	FALSE	FALSE	FALSE	FALSE	FALSE	FALSE	cytoplasm	large ribosomal subunit rRNA binding	translation
Tb927.9.11470	O15883	60S ribosomal protein L29	NA	0.260202	0.528772	0.0311472	0.976929	0.448776	0.101587	0.406971	0.472548	-0.422	0.208	0.77	0.0106	-0.28	0.63	0.337	-0.291	Tb927.9.11470	OG5_127016	ND	Cytoplasm	ND	FALSE	FALSE	FALSE	FALSE	FALSE	FALSE	FALSE	FALSE	cytosolic large ribosomal subunit	RNA binding	translation
Tb927.9.11580	Q38DN0	NA	NA	0.730242	0.919114	0.451341	0.710593	0.223779	0.663633	0.521732	0.153735	-0.197	0.0518	0.388	-0.212	0.713	0.249	0.404	0.926	Tb927.9.11580	OG5_139863	ND	Peroxisome	ND	FALSE	TRUE	FALSE	FALSE	FALSE	FALSE	FALSE	FALSE	glycosome	N/A	N/A
Tb927.9.12170	Q38DI2	leucine-rich repeat protein (LRRP), putative	NA	0.0483812	0.699197	0.175561	0.23881	0.160966	0.092068	0.0738655	0.823237	-1.18	-0.193	0.697	0.672	0.808	0.987	-1.15	0.136	Tb927.9.12170	OG5_144121	ND	Cytoplasm	ND	FALSE	FALSE	FALSE	FALSE	FALSE	FALSE	FALSE	FALSE	cell tip	N/A	N/A
Tb927.9.12200	Q38DH8	60S ribosomal subunit protein L31, putative	NA	0.0129968	0.547857	0.0363001	0.0306898	0.0733979	0.00431999	0.0116404	0.677223	-1.16	0.226	0.847	0.983	0.792	1.39	-1.3	-0.191	Tb927.9.12200	OG5_126907	ND	Nucleus	ND	FALSE	FALSE	FALSE	FALSE	FALSE	FALSE	FALSE	FALSE	cytosolic large ribosomal subunit	structural constituent of ribosome	cytoplasmic translation
Tb927.9.12300	Q38DH5	replication factor C, subunit 3, putative	NA	0.0125618	0.303976	0.922811	0.0137611	0.0649887	0.00186225	0.904245	0.472496	-0.988	0.33	-0.0305	-0.972	-0.692	1.32	-0.0465	0.28	Tb927.9.12300	OG5_127045	nucleoplasm	Cytoplasm	ND	FALSE	FALSE	FALSE	FALSE	FALSE	FALSE	FALSE	FALSE	DNA replication factor C complex	ATP binding	DNA repair
Tb927.9.12330	Q38DH2	thioredoxin, putative	NA	0.244281	0.356578	0.0391119	0.770138	0.0318352	0.0574118	0.325786	0.0778604	0.91	-0.639	-1.52	0.223	1.78	-1.55	-0.836	1.56	Tb927.9.12330	OG5_149012	axoneme, cytoplasm	Cytoplasm	7-20;120-171	FALSE	FALSE	FALSE	FALSE	FALSE	TRUE	FALSE	FALSE	axoneme	N/A	N/A
Tb927.9.12570	Q9NJP9	NA	NA	0.810604	0.249608	0.109834	0.384288	0.0255014	0.208392	0.73148	0.166762	0.0606	-0.266	-0.378	-0.223	-0.619	-0.327	-0.0951	-0.396	Tb927.9.12570	OG5_126746	ND	Peroxisome	ND	FALSE	FALSE	FALSE	FALSE	FALSE	FALSE	FALSE	FALSE	glycosome	ATP binding	glycerol metabolic process
Tb927.9.13280	Q38D96	Double RNA binding domain protein 9	DRBD9	0.876694	0.889936	0.108307	0.0353176	0.287716	0.974943	0.399969	0.00723031	-0.0877	-0.0699	0.85	1.29	-0.613	0.0177	-0.527	-1.9	DRBD9	OG5_128354	nucleolus, nucleoplasm(weak)	Nucleus	ND	FALSE	FALSE	FALSE	FALSE	FALSE	FALSE	FALSE	FALSE	nucleolus	RNA binding	RNA processing
Tb927.9.13350	Q38D89	hypothetical protein, conserved	NA	0.387258	0.380185	0.894485	0.898251	0.494556	0.935887	0.43371	0.610272	0.266	0.241	0.036	0.0388	0.209	-0.0244	0.263	0.17	Tb927.9.13350	OG5_148998	ND	Nucleus	37-46	FALSE	FALSE	FALSE	FALSE	FALSE	FALSE	FALSE	FALSE	nucleolus	phosphate ion binding	N/A
Tb927.9.13650	Q38D65	ADP-ribosylation factor, putative	ARF1	0.357697	0.619536	0.546511	0.0934672	0.322821	0.181585	0.064424	0.491651	-0.394	0.188	0.229	0.746	0.425	0.583	-0.911	-0.321	ARF1	OG5_126696	ND	Golgi_apparatus	ND	FALSE	TRUE	FALSE	FALSE	FALSE	FALSE	FALSE	FALSE	cytoplasm	GTP binding	intracellular protein transport
Tb927.9.13820	Q38D58	kinetoplastid membrane protein 11-3	KMP11-3	0.126861	0.260703	0.324785	0.782242	0.116988	0.575165	0.380828	0.0963183	0.487	0.315	-0.274	-0.0847	0.501	-0.172	0.298	0.586	KMP11-3	OG5_135220	basal body, flagellum attachment zone, axoneme, nucleus(points), cytoplasm	Cytoplasm	ND	FALSE	FALSE	FALSE	FALSE	FALSE	FALSE	FALSE	FALSE	axoneme	protein binding	ciliary basal body organization
Tb927.9.15050	Q38CZ5	nexin-dynein regulatory complex 4	DRC4	0.0189665	0.188938	0.273199	0.872929	0.776433	0.00161424	0.124363	0.909628	1.11	-0.519	-0.428	-0.0684	-0.122	-1.63	0.752	-0.0532	DRC4	OG5_129322	ND	Cytoplasm	2-26	FALSE	FALSE	FALSE	FALSE	FALSE	FALSE	FALSE	FALSE	Golgi apparatus	microtubule binding	cellular protein localization
Tb927.9.15170	Q38CY8	60S ribosomal protein L5, putative	L5	0.0120174	0.788328	0.0010931	0.0284577	0.0124772	0.00737248	0.149795	0.707113	1.35	-0.115	-1.72	-1.15	-1.35	-1.47	0.786	-0.198	L5	OG5_127090	ND	Cytoplasm	285-299	FALSE	FALSE	FALSE	FALSE	FALSE	FALSE	FALSE	FALSE	cytoplasm	5S rRNA binding	ribosomal large subunit assembly
Tb927.9.15210	Q38CY6	ribosomal protein L36, putative	NA	0.476516	0.111533	0.692889	0.635215	0.810022	0.0408486	0.447635	0.515991	-0.375	0.779	0.185	0.249	-0.126	1.15	-0.439	-0.374	Tb927.9.15210	OG5_127134	cytoplasm(patchy), nucleolus	Cytoplasm	ND	FALSE	FALSE	FALSE	FALSE	FALSE	FALSE	FALSE	FALSE	cytoplasm	structural constituent of ribosome	cytoplasmic translation
Tb927.9.15360	Q38CX3	40S ribosomal protein S6, putative	NA	0.046208	0.125194	0.156716	0.702735	0.423344	0.479542	0.683059	0.697246	-1.26	-0.842	0.773	-0.225	-0.476	0.42	-0.264	-0.251	Tb927.9.15360	OG5_126964	cytoplasm(patchy)	Cytoplasm	217-230	FALSE	FALSE	FALSE	FALSE	FALSE	FALSE	FALSE	FALSE	cytoplasm	mRNA binding	regulation of cell growth
Tb927.9.15420	Q38CW9	60S ribosomal protein L32	NA	0.692326	0.958086	0.992465	0.603895	0.999058	0.727057	0.403576	0.63627	0.14	0.0166	0.00297	-0.184	-0.000416	-0.123	0.326	0.183	Tb927.9.15420	OG5_126965	ND	Cytoplasm	ND	FALSE	FALSE	FALSE	FALSE	FALSE	FALSE	FALSE	FALSE	cytosolic large ribosomal subunit	structural constituent of ribosome	translation
Tb927.9.15450	Q38CW8	Domain of unknown function (DUF4205), putative	NA	0.955335	0.785712	0.85204	0.654191	0.76125	0.764915	0.757612	0.494948	-0.0455	0.198	0.136	0.365	-0.247	0.243	-0.275	-0.612	Tb927.9.15450	OG5_131030	ND	Nucleus	115-137;165-196	FALSE	FALSE	FALSE	FALSE	FALSE	FALSE	FALSE	FALSE	ciliary basal body	N/A	N/A
Tb927.9.1560	Q38FZ1	DnaJ domain containing protein, putative	J73	0.968959	0.212061	0.426247	0.29895	0.52507	0.246636	0.730393	0.70283	0.0178	-0.525	-0.329	-0.484	-0.292	-0.542	0.173	0.191	J73	OG5_144160	ND	Nucleus	306-329;398-407;435-464	FALSE	FALSE	FALSE	FALSE	FALSE	FALSE	FALSE	FALSE	cytoplasm	N/A	N/A
Tb927.9.1600	Q38FY7	hypothetical protein, conserved	TZP182	0.172933	0.425609	0.0259412	0.152307	0.0268402	0.494526	0.0700597	0.397697	-0.504	-0.258	-0.781	-0.531	-0.867	0.246	-0.754	-0.336	TZP182	OG5_148036	ND	Cytoplasm	1238-1248	FALSE	FALSE	FALSE	FALSE	FALSE	FALSE	FALSE	FALSE	ciliary pocket	protein serine/threonine kinase activity	actomyosin structure organization
Tb927.9.1750	Q38FX4	Fibronectin type III domain containing protein, putative	NA	0.0832252	0.459007	0.0533371	0.624443	0.84168	0.256558	0.641126	0.530756	0.495	0.181	-0.5	0.133	-0.054	-0.314	-0.139	-0.187	Tb927.9.1750	OG5_148751	flagellum, cytoplasm(points)	Cytoplasm	682-692;1568-1578;1618-1628;2146-2161;2679-2688;3869-3934;4061-4090;4435-4444	TRUE	FALSE	FALSE	FALSE	FALSE	FALSE	FALSE	FALSE	axoneme	cytokine binding	cytokine-mediated signaling pathway
Tb927.9.1880	Q38FW7	WD domain, G-beta repeat, putative	NA	0.020032	0.170945	0.0849305	0.308876	0.00596154	0.00152753	0.0865062	0.0670504	1.59	-0.783	-1.01	-0.641	-1.96	-2.37	1.22	-1.32	Tb927.9.1880	OG5_148749	axoneme, cytoplasm(weak)	Nucleus	363-510	FALSE	FALSE	FALSE	FALSE	FALSE	FALSE	FALSE	FALSE	axoneme	snoRNA binding	N/A
Tb927.9.2120	Q38FU7	hypothetical protein, conserved	NA	0.00370678	0.807304	0.0021331	0.0243665	0.00353301	0.00579005	0.0302035	0.390467	-1.37	-0.0882	1.33	0.999	1.38	1.29	-1.05	0.385	Tb927.9.2120	OG5_148743	ND	Nucleus	ND	FALSE	FALSE	FALSE	FALSE	FALSE	FALSE	FALSE	FALSE	nucleolus	N/A	N/A
Tb927.9.2470	Q38FS0	nucleolar protein	NOP86	0.560421	0.278489	0.300715	0.742828	0.357978	0.130648	0.978687	0.58302	-0.187	0.317	0.302	0.105	0.298	0.504	0.00936	0.193	NOP86	OG5_140922	ND	Cytoplasm	ND	FALSE	FALSE	FALSE	FALSE	FALSE	FALSE	FALSE	FALSE	cytoplasm	N/A	G2/M transition of mitotic cell cycle
Tb927.9.2520	Q38FR6	microtubule-associated protein	GB4	0.712325	0.121034	0.699109	0.799745	0.0726379	0.290175	0.382354	0.06428	0.176	0.689	0.165	-0.121	0.906	0.513	0.461	1.03	GB4	OG5_142233	ND	Cytoplasm	ND	FALSE	FALSE	FALSE	FALSE	FALSE	FALSE	FALSE	FALSE	cell tip	N/A	N/A
Tb927.9.3130	Q38FL2	hypothetical protein, conserved	NA	0.782349	0.513863	0.846071	0.406189	0.771062	0.755614	0.395056	0.310254	-0.087	-0.185	0.0546	0.264	-0.0916	-0.0981	-0.297	-0.356	Tb927.9.3130	OG5_145975	ND	Nucleus	2-124;488-566	FALSE	FALSE	FALSE	FALSE	FALSE	FALSE	FALSE	FALSE	cilium	N/A	N/A
Tb927.9.3990	Q38FD9	ribosomal protein S7, putative	NA	0.0985546	0.801851	0.156162	0.848426	0.542565	0.0653896	0.578476	0.700973	-0.498	0.0644	0.377	0.0548	0.176	0.562	-0.175	0.121	Tb927.9.3990	OG5_127368	ND	Cytoplasm	ND	FALSE	FALSE	FALSE	FALSE	FALSE	FALSE	FALSE	FALSE	cytoplasm	structural constituent of ribosome	rRNA processing
Tb927.9.4210	Q38FB8	fatty acyl CoA synthetase 3	ACS3	0.00251588	0.276707	0.12276	0.601467	0.604046	0.0189662	0.0258671	0.347375	-1.49	-0.413	0.599	0.218	-0.216	1.08	-1.11	-0.434	ACS3	OG5_126601	ND	Cytoplasm	ND	FALSE	TRUE	FALSE	FALSE	FALSE	FALSE	FALSE	FALSE	ciliary plasm	fatty-acyl-CoA synthase activity	fatty acid metabolic process
Tb927.9.4680	Q38F76	Eukaryotic initiation factor 4A-1	EIF4A1	0.00395283	0.313161	0.0041452	0.13374	0.540265	0.0253776	0.288944	0.0620797	1.05	0.286	-0.933	0.487	-0.192	-0.764	-0.369	-0.679	EIF4A1	OG5_126984	cytoplasm(patchy)	Cytoplasm	355-366	FALSE	TRUE	FALSE	FALSE	FALSE	FALSE	FALSE	FALSE	cytoplasm	ATP binding	cytoplasmic translational initiation
Tb927.9.5100	Q38F42	cAMP-specific phosphodiesterase	PDEB2	0.7188	0.000140044	0.000205242	0.221461	0.00382548	0.000799641	0.00625919	0.0673037	0.141	1.77	1.7	0.492	1.33	1.63	1.35	0.835	PDEB2	OG5_127318	paraflagellar rod, cytoplasm	Cytoplasm	ND	FALSE	FALSE	FALSE	FALSE	FALSE	FALSE	FALSE	FALSE	axoneme	3',5'-cyclic-nucleotide phosphodiesterase activity	signal transduction
Tb927.9.5410	Q38F14	hypothetical protein, conserved	NA	0.0452298	0.603822	0.123062	0.0917361	0.515188	0.107076	0.0359583	0.315112	-0.899	-0.195	0.601	0.741	0.274	0.705	-1.04	-0.467	Tb927.9.5410	OG5_148423	axoneme	Cytoplasm	262-273	FALSE	FALSE	FALSE	FALSE	FALSE	FALSE	FALSE	FALSE	axoneme	N/A	N/A
Tb927.9.5860	Q71SQ4	tryparedoxin peroxidase	TRYP1	0.0498957	0.0106248	0.0177269	0.960493	0.00512552	0.63466	0.00087393	0.00831978	0.836	1.03	0.936	-0.0197	1.29	0.19	1.79	1.31	TRYP1	OG5_126593	ND	Cytoplasm	ND	FALSE	FALSE	FALSE	FALSE	FALSE	FALSE	FALSE	FALSE	cilium	thioredoxin peroxidase activity	cell redox homeostasis
Tb927.9.6250	Q38EV1	arginine kinase	AK2	0.141153	0.261418	0.0103833	0.240393	0.300246	0.616496	0.896541	0.892914	0.788	0.529	-1.33	-0.619	-0.543	-0.259	0.0733	0.0759	AK2	OG5_128330	ND	Cytoplasm	37-46	FALSE	FALSE	FALSE	FALSE	FALSE	FALSE	FALSE	FALSE	cytoplasm	ATP binding	N/A
Tb927.9.6560	Q38ES8	NAK family pseudokinase, putative	NA	0.568207	0.0798802	0.968934	0.0145999	0.555418	0.288587	0.0685428	0.0667633	0.142	0.409	0.0086	0.674	0.146	0.267	-0.524	-0.527	Tb927.9.6560	OG5_140422	cytoplasm, endocytic, flagellar cytoplasm, cell tip(posterior)	Nucleus	2-14;53-66;546-566;587-702;705-718	FALSE	TRUE	FALSE	FALSE	FALSE	FALSE	FALSE	FALSE	cell tip	ATP binding	protein phosphorylation
Tb927.9.7020	Q38EP0	hypothetical protein, conserved	NA	0.878623	0.169295	0.0233933	0.890171	0.0406749	0.168571	0.092697	0.0742396	-0.0398	0.331	0.58	0.0359	0.575	0.371	0.505	0.54	Tb927.9.7020	OG5_148240	ND	Mitochondrion	33-66	FALSE	FALSE	FALSE	FALSE	FALSE	FALSE	FALSE	FALSE	mitochondrion	N/A	N/A
Tb927.9.7110	Q38EN1	GRAM domain containing protein, putative	NA	0.922119	0.524794	0.52048	0.0896593	0.0466894	0.505771	0.244058	0.749457	-0.0761	0.446	0.451	1.39	1.67	0.522	-1.02	0.273	Tb927.9.7110	OG5_tbru|Tb09.160.5200	endocytic, cytoplasm	Cytoplasm	58-67	FALSE	TRUE	FALSE	FALSE	FALSE	FALSE	FALSE	FALSE	cytoplasm	N/A	posttranscriptional regulation of gene expression
Tb927.9.7590	Q38EI9	60S ribosomal protein L11, putative	L11	0.552646	0.9556	0.370237	0.156013	0.734844	0.520495	0.138913	0.310346	-0.251	0.0209	0.342	-0.618	-0.143	0.272	0.709	0.476	L11	OG5_126688	ND	Cytoplasm	ND	FALSE	FALSE	FALSE	FALSE	FALSE	FALSE	FALSE	FALSE	cytoplasm	RNA binding	rRNA processing
Tb927.9.8070	Q38EC5	QM-like protein	QM	0.0931464	0.284879	0.00297871	0.266464	0.504782	0.433774	5.92901e-05	0.672822	0.575	0.318	1.02	-0.37	-0.219	-0.257	1.97	0.151	QM	OG5_126951	cytoplasm(patchy)	Cytoplasm	ND	FALSE	FALSE	FALSE	FALSE	FALSE	FALSE	FALSE	FALSE	cytoplasm	structural constituent of ribosome	ribosomal large subunit assembly
Tb927.9.8200	Q38EE3	Pescadillo N-terminus/BRCA1 C Terminus (BRCT) domain containing protein, putative	NA	0.0257584	0.170263	0.24367	0.758659	0.504943	0.250908	0.139563	0.377784	-1.1	-0.569	0.479	0.138	-0.301	0.527	-0.755	-0.439	Tb927.9.8200	OG5_128009	nucleolus	Nucleus	455-465;626-645	FALSE	FALSE	FALSE	FALSE	FALSE	FALSE	FALSE	FALSE	PeBoW complex	RNA binding	maturation of LSU-rRNA from tricistronic rRNA transcript (SSU-rRNA, 5.8S rRNA, LSU-rRNA)
Tb927.9.8720	Q38EA4	fructose-1,6-bisphosphatase	FBPase	0.741705	0.456144	0.559686	0.231532	0.198954	0.324145	0.353089	0.930363	0.0921	-0.188	-0.146	-0.342	-0.369	-0.28	0.288	-0.0267	FBPase	OG5_127400	cytoplasm(patchy)	Peroxisome	ND	FALSE	FALSE	FALSE	FALSE	FALSE	FALSE	FALSE	FALSE	cytoplasm	fructose 1,6-bisphosphate 1-phosphatase activity	carbohydrate metabolic process
Tb927.9.8850	Q38E94	actin A	NA	0.866091	0.313023	0.684601	0.263553	0.0745778	0.457462	0.233445	0.4991	-0.0395	-0.215	0.0853	-0.268	-0.442	-0.176	0.314	-0.175	Tb927.9.8850	OG5_126595	ND	Cytoplasm	ND	FALSE	FALSE	FALSE	FALSE	FALSE	FALSE	FALSE	FALSE	actin cytoskeleton	structural constituent of cytoskeleton	cytoskeleton organization
Tb927.9.9140	Q38E76	hypothetical protein, conserved	NA	0.165237	0.878454	0.16265	0.797022	0.1309	0.206519	0.715137	0.240843	-0.841	-0.08	0.757	0.151	0.921	0.761	-0.234	0.771	Tb927.9.9140	OG5_149036	endocytic, cytoplasm	Cytoplasm	ND	FALSE	FALSE	FALSE	FALSE	FALSE	FALSE	FALSE	FALSE	N/A	N/A	N/A
Tb927.9.9660	Q38E31	Mitochondrial import receptor subunit ATOM40	ATOM40	0.391925	0.183509	0.88457	0.440617	0.325038	0.0507331	0.120608	0.839449	-0.623	0.882	-0.0933	0.56	0.719	1.5	-1.28	0.159	ATOM40	OG5_149033	mitochondrion(25%), cytoplasm(75%, reticulated, points)	Peroxisome	73-82	FALSE	TRUE	FALSE	FALSE	FALSE	FALSE	FALSE	FALSE	cytoplasm	N/A	protein import into mitochondrial matrix
Tb927.9.9940	Q38E08	parkin coregulated gene protein	PACRGB	0.20869	0.883162	0.8486	0.0911557	0.721879	0.168533	0.0171304	0.206891	-0.935	0.0951	0.124	1.29	0.258	1.03	-2.1	-1.03	PACRGB	OG5_129548	axoneme	Nucleus	ND	FALSE	FALSE	FALSE	FALSE	FALSE	FALSE	FALSE	FALSE	axoneme	Hsp70 protein binding	cilium-dependent cell motility
VSA1_TRYBB	P06015	NA	NA	0.00690412	0.0881549	0.00148273	0.468332	0.968388	0.151292	0.726649	0.530218	1.36	0.704	-1.51	-0.32	-0.0173	-0.652	0.168	0.303	VSA1_TRYBB	NA	NA	NA	NA	FALSE	FALSE	FALSE	FALSE	FALSE	FALSE	FALSE	FALSE	NA	NA	NA

## Sheet: differentiation
gene.id	uniProt.id	symbol	Product.Description	Alba3_early_vs_Alba3_late_p.val	Alba3_early_vs_Alba4_early_p.val	Alba3_early_vs_J1339_early_p.val	Alba3_late_vs_Alba4_late_p.val	Alba3_late_vs_J1339_late_p.val	Alba4_early_vs_Alba4_late_p.val	Alba4_early_vs_J1339_early_p.val	Alba4_late_vs_J1339_late_p.val	Alba4.dyrk_early_vs_Alba4_early_p.val	Alba4.dyrk_early_vs_Alba4.dyrk_late_p.val	Alba4.dyrk_early_vs_J1339_early_p.val	Alba4.dyrk_late_vs_Alba4_late_p.val	Alba4.dyrk_late_vs_J1339_late_p.val	Alba3_early_vs_Alba3_late_ratio	Alba3_early_vs_Alba4_early_ratio	Alba3_early_vs_J1339_early_ratio	Alba3_late_vs_Alba4_late_ratio	Alba3_late_vs_J1339_late_ratio	Alba4_early_vs_Alba4_late_ratio	Alba4_early_vs_J1339_early_ratio	Alba4_late_vs_J1339_late_ratio	Alba4.dyrk_early_vs_Alba4_early_ratio	Alba4.dyrk_early_vs_Alba4.dyrk_late_ratio	Alba4.dyrk_early_vs_J1339_early_ratio	Alba4.dyrk_late_vs_Alba4_late_ratio	Alba4.dyrk_late_vs_J1339_late_ratio	short.name	OrthologGroup	Tryptag_location	DeepLoc_location	lcr_005_Position	Data_Cayla2020	Data_Fritz2015	Data_Sif	Data_Dejung2016upSS	Data_Dejung2016upSL	Data_Bevka2021alba3SS	Data_Bevka2021alba3Proc	Data_CCR	Data_starvation_alba4	Data_starvation_alba4.dyrkko	Curated.GO.Components	Curated.GO.Functions	Curated.GO.Processes
esag8_partial	B3GVS1	NA	NA	0.916393	0.19477	0.0525178	0.404666	0.00801137	0.0318684	0.483201	0.00107806	0.00175827	0.00076119	0.000314101	0.0150065	0.271572	-0.0562	0.708	1.09	-0.45	1.55	-1.21	0.378	2	1.89	2.07	2.26	-1.4	0.597	esag8_partial	NA	NA	NA	NA	FALSE	FALSE	FALSE	FALSE	FALSE	FALSE	FALSE	FALSE	FALSE	FALSE	NA	NA	NA
KPYK2_TRYBB	P30616	NA	NA	0.824834	0.00576412	0.00013863	0.851376	0.373674	0.00624221	0.134621	0.284266	0.134811	0.00057817	0.999369	0.585201	0.59205	-0.0984	-1.35	-2.03	0.0833	-0.399	1.33	-0.683	-0.482	0.682	1.77	-0.000351	0.243	-0.239	KPYK2_TRYBB	NA	NA	NA	NA	FALSE	FALSE	FALSE	FALSE	FALSE	FALSE	FALSE	FALSE	FALSE	FALSE	NA	NA	NA
Tb09.v4.0013	Q4FKV5	NA	retrotransposon hot spot (RHS) protein, putative	0.000352895	0.00326488	0.0546122	0.341822	0.465314	0.963634	0.216072	0.100596	2.28161e-05	1.07984e-05	0.000491267	0.719725	0.190447	2.81	2.2	1.35	-0.646	0.494	-0.0306	-0.847	1.14	3.57	3.78	2.72	-0.242	0.898	Tb09.v4.0013	OG5_126555	ND	Cytoplasm	35-45	FALSE	FALSE	FALSE	FALSE	FALSE	FALSE	FALSE	FALSE	FALSE	FALSE	N/A	N/A	N/A
Tb09.v4.0015	Q4FKV4	NA	hypothetical protein	0.615593	0.00152551	0.0217327	0.782756	0.772436	0.000226691	0.261637	0.989231	0.000518059	0.0301209	0.00800111	0.014366	0.0139359	-0.359	2.56	1.74	-0.197	-0.206	-3.11	-0.813	-0.00963	2.87	1.64	2.06	-1.88	-1.89	Tb09.v4.0015	OG5_247734	ND	Nucleus	ND	FALSE	FALSE	FALSE	FALSE	FALSE	FALSE	FALSE	FALSE	FALSE	FALSE	N/A	N/A	N/A
Tb10.v4.0052	Q4FKN8	NA	microtubule-associated protein 2	0.644535	0.149347	0.201441	0.940353	0.381491	0.0538901	0.860763	0.422462	0.449972	0.0757575	0.354142	0.356224	0.0924702	0.181	-0.579	-0.51	0.0293	0.346	0.79	0.0688	0.317	0.298	0.723	0.367	0.365	0.682	Tb10.v4.0052	OG5_136174	ND	Cytoplasm	4707-4728;4739-4762	FALSE	FALSE	FALSE	FALSE	FALSE	FALSE	FALSE	FALSE	FALSE	FALSE	N/A	N/A	N/A
Tb11.02.5430	Q384R2	NA	hypothetical protein, conserved	0.153201	0.0388638	0.98447	0.173849	0.476766	4.49168e-05	0.0373095	0.502376	0.00013238	0.793224	0.0244941	0.856064	0.623096	-0.697	1.03	-0.00927	-0.662	-0.341	-2.39	-1.04	0.321	2.18	-0.125	1.14	-0.0864	0.235	Tb11.02.5430	OG5_157172	ND	Nucleus	298-317;370-402	FALSE	FALSE	FALSE	FALSE	FALSE	FALSE	FALSE	FALSE	FALSE	FALSE	N/A	N/A	N/A
Tb11.0845	Q4FKD8	DYNLL2	dynein light chain LC8, putative	0.175614	0.0671459	0.10186	0.0617871	0.970034	0.163451	0.828657	0.0573049	0.0861646	0.086164	0.128884	0.163452	0.57771	1.1	1.52	1.35	1.55	-0.0299	1.14	-0.173	-1.58	1.42	1.42	1.24	1.14	-0.445	DYNLL2	OG5_127498	ND	Cytoplasm	ND	FALSE	FALSE	FALSE	FALSE	FALSE	FALSE	FALSE	FALSE	FALSE	FALSE	axoneme	dynein intermediate chain binding	microtubule-based process
Tb11.1380	Q4FKA8	CAP46	Cytoskeleton-associated protein 46 kDa	0.0120224	0.323206	0.295391	0.763068	0.587722	0.0541904	0.951638	0.80872	0.0758595	0.00168987	0.0673492	0.754142	0.579727	1.89	0.699	0.741	0.211	0.38	1.41	0.0424	0.169	1.29	2.48	1.33	0.219	0.389	CAP46	OG5_148776	ND	Cytoplasm	ND	FALSE	FALSE	FALSE	FALSE	FALSE	FALSE	FALSE	FALSE	FALSE	TRUE	cytoskeleton	N/A	mitotic cleavage furrow formation
Tb927.1.120	Q8IFI8	RHS4	retrotransposon hot spot protein 4 (RHS4), putative	1.08672e-06	0.662672	0.0547566	0.694434	0.568131	9.85241e-07	0.0217521	0.857642	0.0305368	0.0475644	0.87553	0.0300684	0.0438705	-3.26	0.215	-0.989	0.194	0.282	-3.28	-1.2	0.0884	1.13	-1.02	-0.0772	-1.13	-1.04	RHS4	OG5_126555	nucleolus, nucleus(weak)	Nucleus	ND	FALSE	FALSE	FALSE	FALSE	FALSE	FALSE	FALSE	FALSE	FALSE	FALSE	cytoplasm	mRNA binding	mRNA export from nucleus
Tb927.1.1370	Q4GZ82	NA	rRNA biogenesis protein, putative	0.132065	0.327086	0.0636356	0.153774	0.265394	0.0536816	0.351514	0.740975	0.0234163	5.35437e-05	0.00267174	0.599474	0.395016	1.15	0.739	1.44	1.09	0.843	1.5	0.702	-0.247	1.8	3.7	2.5	-0.393	-0.64	Tb927.1.1370	OG5_126915	nucleolus	Nucleus	304-325	FALSE	FALSE	FALSE	FALSE	FALSE	FALSE	FALSE	FALSE	FALSE	FALSE	nucleolus	RNA binding	rRNA processing
Tb927.1.1720	Q4GZ47	NA	cyclophilin 15, putative	0.713293	0.181831	0.660696	0.00674739	0.889026	0.226999	0.360388	0.00932264	0.0371176	0.0702572	0.211739	0.133147	0.209453	-0.264	0.976	0.315	2.12	0.0999	0.88	-0.661	-2.02	1.57	1.35	0.911	1.1	-0.916	Tb927.1.1720	OG5_145945	ND	Nucleus	ND	FALSE	FALSE	FALSE	FALSE	FALSE	FALSE	FALSE	FALSE	FALSE	FALSE	nucleus	N/A	N/A
Tb927.1.1750	Q4GZ44	NA	conserved protein, unknown function	0.353602	0.0124929	0.208097	0.166382	0.362419	4.29317e-05	0.167893	0.0275724	0.00201716	0.181722	0.0493533	0.83136	0.0432629	-0.492	1.41	0.673	-0.743	0.483	-2.65	-0.74	1.23	1.82	-0.716	1.08	-0.112	1.11	Tb927.1.1750	OG5_166718	ND	Nucleus	ND	FALSE	FALSE	FALSE	FALSE	FALSE	FALSE	FALSE	FALSE	FALSE	FALSE	nucleus	N/A	N/A
Tb927.1.2330	Q4GYY6	NA	beta tubulin	0.932043	0.10743	0.869279	0.265756	0.890627	0.0082394	0.144749	0.326805	0.600482	0.0305688	0.337195	0.950508	0.357339	0.0418	-0.813	-0.0806	0.553	0.0674	1.41	0.732	-0.486	-0.257	1.12	0.475	0.0304	-0.455	Tb927.1.2330	OG5_126611	cytoplasm(75%)	Cytoplasm	140-149;431-440	FALSE	FALSE	FALSE	FALSE	FALSE	FALSE	FALSE	FALSE	FALSE	FALSE	cytoplasm	GTP binding	microtubule cytoskeleton organization
Tb927.1.2340	Q4GYY5	NA	alpha tubulin	0.423511	0.0119297	0.485983	0.480798	0.995085	0.0148612	0.054161	0.484573	0.119677	0.362496	0.68154	0.924281	0.544958	-0.383	-1.29	-0.333	0.337	0.00292	1.24	0.956	-0.334	-0.76	0.437	0.195	0.0451	-0.289	Tb927.1.2340	OG5_126605	cytoplasm, flagellar cytoplasm	Cytoplasm	ND	FALSE	FALSE	FALSE	FALSE	FALSE	FALSE	FALSE	FALSE	FALSE	FALSE	ciliary basal body	GTP binding	microtubule cytoskeleton organization
Tb927.1.2430	Q4GYX7	H3	histone H3, putative	4.48491e-05	0.51066	0.00382298	0.904245	0.280188	1.2252e-05	0.000773367	0.33508	0.0513404	0.0178654	0.0787153	0.324825	0.982957	-2.93	0.386	-1.87	0.0702	0.639	-3.25	-2.25	0.568	1.19	-1.48	-1.06	-0.581	-0.0125	H3	OG5_126569	ND	Nucleus	15-26	FALSE	FALSE	FALSE	FALSE	FALSE	FALSE	FALSE	FALSE	FALSE	FALSE	nucleoplasm	DNA binding	N/A
Tb927.1.2570	Q9NFU6	NA	NA	0.00112954	0.013405	0.0201916	0.0928339	0.881807	0.0101533	0.854407	0.0696474	0.00109113	0.000181181	0.00170418	0.0501083	0.869645	2.23	1.6	1.49	1.04	-0.0893	1.67	-0.11	-1.13	2.23	2.67	2.12	1.23	0.0985	Tb927.1.2570	OG5_127619	ND	Cytoplasm	ND	FALSE	TRUE	FALSE	FALSE	FALSE	FALSE	FALSE	FALSE	FALSE	FALSE	COPI vesicle coat	N/A	endoplasmic reticulum to Golgi vesicle-mediated transport
Tb927.1.3180	Q4GYQ5	S11	40S ribosomal protein S11, putative	0.635422	0.101764	0.0374425	0.716579	0.571288	0.399081	0.616493	0.837885	0.500616	0.0520572	0.245732	0.0735511	0.0488199	-0.222	-0.79	-1.02	-0.17	-0.266	0.398	-0.235	-0.0957	-0.317	0.95	-0.552	-0.869	-0.965	S11	OG5_126986	cytoplasm(patchy)	Cytoplasm	ND	FALSE	FALSE	FALSE	FALSE	FALSE	FALSE	FALSE	FALSE	FALSE	FALSE	cytoplasm	structural constituent of ribosome	translation
Tb927.1.4040	Q4GYH3	NA	hypothetical protein, conserved	0.257332	0.569411	0.957367	0.789607	0.362828	0.401469	0.605846	0.243206	0.532295	0.323886	0.259358	0.231658	0.975624	-0.605	-0.3	-0.0281	-0.14	0.483	-0.445	0.272	0.624	0.33	0.525	0.602	-0.64	-0.0161	Tb927.1.4040	OG5_148364	ND	Nucleus	106-117;177-238;244-263;278-287;342-351;401-425	FALSE	FALSE	FALSE	FALSE	FALSE	FALSE	FALSE	FALSE	FALSE	FALSE	ciliary basal body	N/A	N/A
Tb927.1.4180	Q4GYG0	NA	leucine-rich repeat protein (LRRP), putative	0.501336	0.0988402	0.106907	0.656481	0.316836	0.00920787	0.966494	0.154438	0.000955864	0.767971	0.00105896	0.514907	0.0440937	-0.363	0.917	0.894	-0.24	0.545	-1.52	-0.0226	0.784	2.03	0.159	2.01	0.352	1.14	Tb927.1.4180	OG5_135162	ND	Cytoplasm	227-247;273-282;710-720;723-744	FALSE	FALSE	FALSE	FALSE	FALSE	TRUE	FALSE	FALSE	FALSE	FALSE	axoneme	N/A	N/A
Tb927.1.4280	Q4GYF0	NA	hypothetical protein, conserved	0.000427318	0.371498	0.282616	0.00662601	0.931414	0.81457	0.851647	0.00809345	0.104618	0.0653031	0.0731803	0.991844	0.00828712	2.22	0.488	0.589	-1.61	-0.0465	0.127	0.101	1.56	0.905	1.04	1.01	-0.00553	1.55	Tb927.1.4280	OG5_174128	ND	Cytoplasm	443-452	TRUE	FALSE	FALSE	FALSE	FALSE	FALSE	FALSE	FALSE	TRUE	FALSE	cortical cytoskeleton	N/A	posttranscriptional regulation of gene expression
Tb927.1.700	P07378	NA	NA	1.03166e-05	0.00249912	0.0227615	0.636921	0.705665	0.0113681	0.344133	0.39843	0.0650796	0.00771873	0.339716	0.0902853	0.371987	-3.66	-2.19	-1.57	-0.307	0.245	-1.77	0.62	0.552	-1.25	-1.88	-0.626	-1.14	-0.585	Tb927.1.700	OG5_126776	ND	Peroxisome	ND	FALSE	TRUE	FALSE	FALSE	FALSE	FALSE	FALSE	FALSE	FALSE	FALSE	cytosol	ADP binding	gluconeogenesis
Tb927.1.990	Q4GZB9	NA	Enkuring domain-containig protein	0.19266	0.619744	0.377777	0.211217	0.868953	0.0448324	0.695223	0.274396	0.699634	0.0993842	0.439229	0.433051	0.750118	1.31	0.489	0.876	1.25	0.162	2.07	0.386	-1.09	0.38	1.67	0.766	0.777	-0.314	Tb927.1.990	OG5_149999	axoneme	Nucleus	ND	FALSE	FALSE	FALSE	FALSE	FALSE	FALSE	FALSE	FALSE	FALSE	FALSE	axoneme	calmodulin binding	N/A
Tb927.10.10590	Q389T1	NA	histone H2B, putative	0.43441	0.0755597	0.977387	0.671249	0.628794	0.00537612	0.0714862	0.952618	0.420054	0.128262	0.294936	0.497596	0.461331	-0.516	1.21	-0.0186	-0.279	-0.318	-2.01	-1.23	-0.039	0.533	-1.03	-0.696	-0.447	-0.486	Tb927.10.10590	OG5_126572	ND	Cytoplasm	ND	FALSE	FALSE	FALSE	FALSE	FALSE	FALSE	FALSE	FALSE	FALSE	TRUE	nucleoplasm	DNA binding	chromosome organization
Tb927.10.1060	Q38CD4	TCP-1-delta	T-complex protein 1, delta subunit, putative	0.000790216	0.304961	0.164345	0.908394	0.603877	4.7043e-05	0.701335	0.527013	6.44533e-05	0.172059	2.54544e-05	0.137186	0.377691	-1.75	0.473	0.648	-0.0524	0.237	-2.28	0.175	0.289	2.22	0.635	2.39	-0.694	-0.405	TCP-1-delta	OG5_127832	ND	Cytoplasm	ND	FALSE	TRUE	FALSE	FALSE	FALSE	FALSE	FALSE	FALSE	FALSE	FALSE	chaperonin-containing T-complex	unfolded protein binding	protein folding
Tb927.10.10850	Q389P5	AGO1	Protein argonaute-1	0.00788874	0.0270944	0.0547916	0.312136	0.9785	0.637122	0.736799	0.299865	0.00243158	8.75685e-05	0.00541559	0.0771801	0.436131	2.16	1.75	1.5	-0.763	0.0201	-0.353	-0.251	0.783	2.53	3.54	2.28	-1.37	-0.585	AGO1	OG5_149426	cytoplasm	Cytoplasm	1-114	FALSE	TRUE	FALSE	FALSE	FALSE	FALSE	FALSE	FALSE	FALSE	FALSE	cytoplasm	mRNA binding	RNA interference
Tb927.10.10880	Q389P2	ABCF1	ATP-binding cassette sub-family F member 1, putative	0.000301385	0.00502874	0.000887564	0.129033	0.795145	0.690811	0.473827	0.202171	0.00026018	8.54124e-06	4.48014e-05	0.0805884	0.609886	2.52	1.83	2.26	-0.925	-0.154	-0.236	0.427	0.771	2.55	3.39	2.98	-1.07	-0.303	ABCF1	OG5_129638	cytoplasm(patchy), flagellar cytoplasm	Cytoplasm	199-208;665-680	FALSE	FALSE	FALSE	FALSE	FALSE	FALSE	FALSE	FALSE	FALSE	FALSE	ATP-binding cassette (ABC) transporter complex	ATP binding	posttranscriptional regulation of gene expression
Tb927.10.10890	Q389P1	NA	heat shock protein, putative	0.000884517	0.10129	0.0530471	0.691144	0.846188	0.0963572	0.740842	0.838454	0.0972169	0.00012067	0.0507394	0.24194	0.329902	-2.09	-0.929	-1.11	0.219	0.107	-0.944	-0.182	-0.112	-0.941	-2.54	-1.12	0.653	0.541	Tb927.10.10890	OG5_126623	cytoplasm(patchy)	Cytoplasm	206-267;530-540;682-691	FALSE	TRUE	FALSE	FALSE	FALSE	FALSE	FALSE	FALSE	FALSE	FALSE	cell surface	unfolded protein binding	cellular response to heat
Tb927.10.1090	Q38CD1	RPS23	40S ribosomal protein S23, putative	0.0292136	0.318191	0.731889	0.84	0.513963	0.279476	0.50703	0.39496	0.877047	0.0486614	0.609635	0.419235	0.964936	1.16	0.506	0.172	-0.101	0.329	0.55	-0.334	0.43	0.0776	1.04	-0.257	-0.408	0.022	RPS23	OG5_127029	ND	Cytoplasm	ND	FALSE	FALSE	FALSE	FALSE	FALSE	FALSE	FALSE	FALSE	FALSE	FALSE	cytosolic small ribosomal subunit	RNA binding	translation
Tb927.10.11080	Q389N1	NA	paraflagellar rod protein	0.000530648	0.154419	0.22043	0.138041	0.262068	4.64219e-07	0.0121291	0.701434	0.804882	1.29956e-05	0.00686629	0.0994627	0.196462	2.13	-0.772	0.66	0.806	0.603	3.71	1.43	-0.203	0.131	2.94	1.56	0.901	0.698	Tb927.10.11080	OG5_135978	ND	Nucleus	70-79;459-974	FALSE	FALSE	FALSE	FALSE	FALSE	FALSE	FALSE	FALSE	FALSE	FALSE	ciliary basal body	N/A	posttranscriptional regulation of gene expression
Tb927.10.11390	Q389K1	NA	60S ribosomal protein L6, putative	0.00281353	0.890964	0.150371	0.0615463	0.572601	0.139012	0.117615	0.176009	0.445698	0.200147	0.402988	0.579782	0.411878	-1.19	0.0488	-0.525	0.694	0.202	-0.54	-0.573	-0.492	0.273	-0.465	-0.3	0.198	-0.294	Tb927.10.11390	OG5_127206	ND	Cytoplasm	6-15;121-140	FALSE	FALSE	FALSE	FALSE	FALSE	FALSE	FALSE	FALSE	FALSE	FALSE	cytoplasm	RNA binding	cytoplasmic translation
Tb927.10.11450	Q389J5	NA	TFIIF-stimulated CTD phosphatase, putative	0.112223	0.784342	0.292445	0.0284106	0.486269	0.000313235	0.189037	0.00585155	0.0103004	0.0478688	0.160308	0.537696	0.00132997	-0.746	0.125	-0.486	-1.06	0.319	-1.93	-0.611	1.38	1.27	-0.944	0.655	0.282	1.66	Tb927.10.11450	OG5_148177	cytoplasm(reticulated)	Nucleus	101-110;139-149;313-322	FALSE	FALSE	FALSE	FALSE	FALSE	FALSE	FALSE	FALSE	FALSE	FALSE	cytoplasm	phosphoprotein phosphatase activity	N/A
Tb927.10.11540	Q389I7	RPS3	40S ribosomal protein S3, putative	0.00100209	0.0129715	0.0187222	0.637444	0.756761	0.130657	0.869849	0.871012	0.297989	0.0381091	0.377709	0.672187	0.793778	-2.77	-1.97	-1.85	-0.348	-0.228	-1.14	0.121	0.12	-0.776	-1.61	-0.655	-0.312	-0.193	RPS3	OG5_126820	cytoplasm(patchy)	Cytoplasm	ND	FALSE	FALSE	FALSE	FALSE	FALSE	FALSE	FALSE	FALSE	FALSE	FALSE	cytoplasm	mRNA binding	ribosome biogenesis
Tb927.10.1170	Q38CC3	IFT172	intraflagellar transport protein 172	0.57851	0.0105273	0.00124293	0.291727	0.733246	0.00318248	0.372414	0.168152	0.000186822	0.08578	2.09822e-05	0.539848	0.430692	0.263	1.3	1.73	-0.503	0.161	-1.54	0.424	0.664	2.09	0.838	2.52	-0.29	0.374	IFT172	OG5_130417	intraflagellar transport particle	Cytoplasm	ND	FALSE	TRUE	FALSE	FALSE	FALSE	FALSE	FALSE	FALSE	FALSE	FALSE	axoneme	N/A	intraciliary transport
Tb927.10.12030	Q389D9	NA	hypothetical protein, conserved	0.00204827	0.912405	0.450927	0.737972	0.935687	0.00351319	0.518448	0.678261	0.925929	0.035209	0.579621	0.27391	0.137304	-2.22	0.0705	0.486	0.215	-0.0517	-2.08	0.416	-0.266	-0.0596	-1.42	0.356	-0.711	-0.978	Tb927.10.12030	OG5_144833	ND	Nucleus	ND	FALSE	FALSE	FALSE	FALSE	FALSE	FALSE	FALSE	FALSE	FALSE	FALSE	nucleolus	N/A	N/A
Tb927.10.12050	Q389D7	NA	LSU ribosomal protein, mitochondrial, putative	0.000675322	0.00901398	0.0792236	0.742723	0.713257	0.167621	0.315823	0.488434	0.000141514	1.39832e-06	0.00169384	0.592956	0.225576	2.53	1.83	1.17	0.212	-0.237	0.91	-0.654	-0.449	2.94	4.19	2.28	-0.346	-0.795	Tb927.10.12050	OG5_148943	kinetoplast, mitochondrion	Mitochondrion	ND	FALSE	FALSE	FALSE	FALSE	FALSE	FALSE	FALSE	FALSE	FALSE	FALSE	kinetoplast	N/A	N/A
Tb927.10.12430	Q389A0	NA	Noc2p family, putative	0.0639235	0.0028462	0.176206	0.45762	0.676197	0.000159151	0.0622482	0.742391	0.00417375	0.00263314	0.229792	9.92558e-05	4.45771e-05	-1.17	2.02	0.84	0.454	0.254	-2.74	-1.18	-0.2	1.92	2.04	0.742	-2.86	-3.06	Tb927.10.12430	OG5_128976	ND	Nucleus	21-63;108-117;239-249	FALSE	FALSE	FALSE	FALSE	FALSE	FALSE	FALSE	FALSE	FALSE	FALSE	Noc1p-Noc2p complex	N/A	ribosomal large subunit biogenesis
Tb927.10.12590	Q388Y4	NA	hypothetical protein, conserved	6.99842e-05	0.0375853	0.132559	0.0197061	0.316597	0.868699	0.521097	0.149825	0.892073	0.00217224	0.611787	0.00445988	0.107271	1.93	0.87	0.614	-0.989	-0.403	0.0657	-0.256	0.587	0.0539	1.37	-0.202	-1.25	-0.66	Tb927.10.12590	OG5_131378	flagellum(patchy), basal body(strong), cytoplasm	Nucleus	1-277;279-350;467-477	FALSE	FALSE	FALSE	FALSE	FALSE	FALSE	FALSE	FALSE	FALSE	FALSE	axonemal dynein complex	dynein heavy chain binding	cilium movement
Tb927.10.12680	Q388X5	NA	60S ribosomal protein L34, putative	0.667389	0.611516	0.227538	0.734315	0.739954	0.209019	0.475256	0.99401	0.235045	0.0396571	0.625673	0.74683	0.752502	-0.507	0.6	1.45	-0.4	-0.391	-1.51	0.846	0.00884	-1.42	-2.55	-0.576	-0.381	-0.372	Tb927.10.12680	OG5_127025	cytoplasm(reticulated, points)	Nucleus	102-170	FALSE	FALSE	FALSE	FALSE	FALSE	FALSE	FALSE	FALSE	FALSE	FALSE	cytoplasm	structural constituent of ribosome	ribosome biogenesis
Tb927.10.12700	Q388X3	NA	pyruvate dehydrogenase E1 alpha subunit, putative	4.87407e-05	0.401881	0.1424	0.167529	0.989499	0.000194166	0.511639	0.163775	0.000294385	3.35715e-06	5.86923e-05	2.27183e-06	9.93496e-08	-2.72	0.46	0.819	0.768	-0.00716	-2.41	0.359	-0.776	2.32	3.33	2.68	-3.42	-4.2	Tb927.10.12700	OG5_127216	ND	Mitochondrion	ND	FALSE	FALSE	FALSE	FALSE	FALSE	FALSE	FALSE	FALSE	FALSE	FALSE	cytoplasm	oxidoreductase activity, acting on the aldehyde or oxo group of donors, disulfide as acceptor	acetyl-CoA biosynthetic process from pyruvate
Tb927.10.12710	Q388X2	HSP110	heat shock protein 110, putative	0.074519	0.389652	0.890613	0.902284	0.803346	0.00886965	0.320373	0.899432	0.0284496	0.20131	0.197099	0.438191	0.51498	-1.09	0.511	-0.0809	-0.0723	-0.147	-1.67	-0.592	-0.0744	1.37	-0.767	0.774	0.459	0.385	HSP110	OG5_127167	cytoplasm	Cytoplasm	515-524;765-775	FALSE	TRUE	FALSE	FALSE	FALSE	FALSE	FALSE	FALSE	FALSE	FALSE	cytoplasm	N/A	response to heat
Tb927.10.12840	Q388W2	MCP12	mitochondrial carrier protein	0.743419	0.12591	0.0839	0.675589	0.181767	0.412218	0.827916	0.349884	0.064649	0.00424628	0.0415374	0.0492083	0.271549	0.342	1.64	1.87	0.437	1.42	-0.861	0.227	0.984	2.01	3.29	2.23	-2.15	-1.16	MCP12	OG5_127710	mitochondrion, kinetoplast(strong, 50%)	Mitochondrion	ND	FALSE	FALSE	FALSE	FALSE	FALSE	FALSE	FALSE	FALSE	FALSE	FALSE	ciliary plasm	C4-dicarboxylate transmembrane transporter activity	C4-dicarboxylate transport
Tb927.10.12870	Q388V9	BBP120	Basal body protein	0.863175	0.00985773	0.00119606	0.545607	0.897069	0.00356383	0.379171	0.464342	0.00534572	0.716293	0.000628876	0.593708	0.840702	0.0872	1.41	1.86	-0.307	0.0654	-1.63	0.449	0.372	1.55	0.184	2	-0.271	0.102	BBP120	OG5_158213	cytoplasm(points), flagellar cytoplasm	Nucleus	875-885;1067-1086	FALSE	FALSE	FALSE	FALSE	FALSE	FALSE	FALSE	FALSE	FALSE	FALSE	ciliary basal body	N/A	N/A
Tb927.10.12890	Q388V7	NA	bifunctional aminoacyl-tRNA synthetase, putative	0.0207618	0.00720847	0.0160133	0.748841	0.699318	0.434444	0.727012	0.481833	0.000230725	0.000281081	0.000543807	0.48226	0.999444	1.41	1.68	1.48	-0.183	0.221	-0.451	-0.2	0.405	2.49	2.45	2.29	-0.405	0.000399	Tb927.10.12890	OG5_127154	ND	Cytoplasm	173-182	FALSE	TRUE	FALSE	FALSE	FALSE	FALSE	FALSE	FALSE	FALSE	FALSE	cytoplasm	N/A	N/A
Tb927.10.12960	Q388V0	RAB5A	Ras-related protein Rab5A	0.269239	0.0628785	0.735598	0.696093	0.929477	0.0132231	0.0312803	0.762297	0.0223147	0.0484545	0.875838	0.0295928	0.0152281	-0.732	1.27	-0.221	0.255	0.0578	-1.74	-1.49	-0.198	1.59	1.35	0.102	-1.5	-1.7	RAB5A	OG5_126724	ND	Golgi_apparatus	66-75	FALSE	TRUE	FALSE	FALSE	FALSE	FALSE	FALSE	FALSE	FALSE	FALSE	endocytic vesicle	GTPase activity	intracellular protein transport
Tb927.10.13140	Q388T3	NA	hypothetical protein, conserved	0.644677	0.274384	0.375664	0.554719	0.103388	0.0396711	0.830312	0.283266	0.0640116	0.163683	0.0969655	0.107524	0.0110399	-0.44	1.06	0.851	-0.565	-1.6	-2.06	-0.204	-1.04	1.84	1.36	1.63	-1.58	-2.62	Tb927.10.13140	OG5_151528	nucleolus	Nucleus	154-166	FALSE	FALSE	FALSE	FALSE	FALSE	FALSE	FALSE	FALSE	FALSE	FALSE	nucleolus	N/A	N/A
Tb927.10.13180	Q388S9	NA	Nrap protein, putative	0.394441	0.0900461	0.279992	0.684216	0.817206	0.0363623	0.512161	0.524934	0.0871422	0.269543	0.272722	0.130358	0.0373225	-0.62	1.27	0.791	0.294	-0.167	-1.59	-0.476	-0.461	1.28	0.809	0.803	-1.12	-1.58	Tb927.10.13180	OG5_128598	nucleolus	Nucleus	ND	FALSE	FALSE	FALSE	FALSE	FALSE	FALSE	FALSE	FALSE	FALSE	FALSE	CURI complex	N/A	rRNA processing
Tb927.10.13360	Q388R1	EF-Tu	Elongation factor Tu, mitochondrial	0.00415484	0.523261	0.0704191	0.973343	0.324092	0.0195879	0.223139	0.340206	0.118583	0.00107825	0.00879836	0.710556	0.555238	2.52	0.51	1.5	-0.0266	-0.793	1.98	0.986	-0.767	1.28	2.96	2.26	0.296	-0.471	EF-Tu	OG5_126954	kinetoplast, mitochondrion	Mitochondrion	ND	FALSE	TRUE	FALSE	FALSE	FALSE	FALSE	FALSE	FALSE	FALSE	FALSE	cytoplasm	translation elongation factor activity	mitochondrial translation
Tb927.10.13500	Q383V8	NA	60S ribosomal protein L10a	0.00471353	0.0912923	0.929852	0.807901	0.962739	0.268174	0.0770818	0.772019	0.0167956	0.000909204	0.470242	0.910809	0.858785	2.9	1.63	-0.0821	-0.227	0.0436	1.05	-1.71	0.27	2.39	3.54	0.677	-0.104	0.166	Tb927.10.13500	OG5_127114	ND	Nucleus	87-96	FALSE	FALSE	FALSE	FALSE	FALSE	FALSE	FALSE	FALSE	FALSE	FALSE	cytoplasm	RNA binding	maturation of LSU-rRNA
Tb927.10.13720	Q388M7	RBP29	RNA-binding protein 29, putative	0.00240115	0.0365188	0.0631204	0.813067	0.571542	0.162435	0.789644	0.424572	0.0115485	0.000114681	0.0209927	0.628759	0.205824	2.31	1.5	1.32	0.161	-0.386	0.973	-0.182	-0.547	1.86	3.16	1.67	-0.33	-0.877	RBP29	OG5_144053	endocytic(weak), cytoplasm(weak)	Nucleus	133-156;272-286;342-351	FALSE	FALSE	FALSE	FALSE	FALSE	FALSE	FALSE	FALSE	FALSE	FALSE	nucleoplasm	RNA binding	RNA processing
Tb927.10.13740	Q388M5	FAZ35	Flagellum attachment zone protein 35	0.750343	0.0214855	0.0154078	0.196203	0.738012	0.419613	0.880854	0.10884	0.0016224	1.71751e-05	0.00112716	0.0128328	0.000243653	0.206	1.59	1.68	0.853	-0.217	-0.526	0.097	-1.07	2.3	3.51	2.4	-1.74	-2.81	FAZ35	OG5_152377	flagellum attachment zone, cytoplasm(reticulated, weak)	Endoplasmic_reticulum	39-49;420-431	FALSE	FALSE	FALSE	FALSE	FALSE	FALSE	FALSE	FALSE	FALSE	FALSE	endoplasmic reticulum	N/A	N/A
Tb927.10.14140	P30615	NA	NA	0.00547175	0.341701	0.288171	0.378	0.732121	0.00646665	0.908151	0.585735	0.00629362	1.73203e-05	0.00479912	0.58612	0.999549	2.08	0.656	0.735	0.607	0.234	2.03	0.0788	-0.373	2.04	3.7	2.12	0.373	-0.000386	Tb927.10.14140	OG5_126685	cytoplasm(strong, patchy), flagellar cytoplasm(weak)	Cytoplasm	ND	FALSE	FALSE	FALSE	FALSE	FALSE	FALSE	FALSE	FALSE	FALSE	FALSE	cytoplasm	mRNA binding	glycolytic process
Tb927.10.14330	Q388G9	NA	Utp14 protein, putative	0.0873719	0.829821	0.152332	0.243032	0.0152911	0.712946	0.21895	0.166	0.00869252	1.02191e-05	0.000429703	0.022695	0.000814131	1.16	0.141	0.96	-0.777	-1.71	0.241	0.82	-0.928	1.87	3.7	2.69	-1.59	-2.52	Tb927.10.14330	OG5_127996	nucleolus	Nucleus	136-162;173-184;438-451	FALSE	FALSE	FALSE	FALSE	FALSE	FALSE	FALSE	FALSE	FALSE	FALSE	ciliary plasm	N/A	N/A
Tb927.10.14490	Q388F3	NA	hypothetical protein, conserved	0.67489	0.312287	0.774723	0.0388545	0.38279	0.0103349	0.464418	0.204478	0.390313	0.0140735	0.119411	0.321707	0.771415	-0.589	-1.43	-0.402	3.05	1.23	3.89	1.03	-1.81	1.22	3.7	2.25	1.41	-0.408	Tb927.10.14490	OG5_148897	ND	Nucleus	88-119	FALSE	FALSE	FALSE	FALSE	FALSE	FALSE	FALSE	FALSE	FALSE	FALSE	cilium	N/A	N/A
Tb927.10.14500	Q388F2	NA	hypothetical protein, conserved	0.783477	0.807694	0.501073	0.0288342	0.521226	0.00906956	0.362295	0.105487	0.442729	0.273788	0.883141	0.346994	0.474343	0.36	-0.319	0.886	3.03	0.845	3.71	1.21	-2.19	-1.01	1.45	0.193	1.25	-0.943	Tb927.10.14500	OG5_148898	ND	Nucleus	ND	FALSE	FALSE	FALSE	FALSE	FALSE	FALSE	FALSE	FALSE	FALSE	FALSE	axoneme	N/A	N/A
Tb927.10.14550	Q388E8	HEL67	ATP-dependent RNA helicase HEL67	0.58423	0.0967567	0.329683	0.846253	0.987727	0.335809	0.467885	0.834244	0.0417181	0.0574804	0.168186	0.417852	0.310848	0.457	1.43	0.819	0.161	-0.0128	-0.809	-0.607	-0.174	1.78	1.65	1.17	-0.679	-0.853	HEL67	OG5_126849	ND	Nucleus	457-618	FALSE	TRUE	FALSE	FALSE	FALSE	FALSE	FALSE	FALSE	FALSE	FALSE	cytoplasm	ATP binding	nucleobase-containing compound metabolic process
Tb927.10.14570	Q388E6	NA	kinesin motor domain containing protein, putative	0.185692	0.46593	0.555593	0.0116841	0.318318	0.00274965	0.887196	0.0973668	0.0447874	0.0121021	0.0597788	0.011266	0.310888	0.988	0.537	0.433	1.99	0.739	2.44	-0.104	-1.25	1.54	1.98	1.44	2	0.75	Tb927.10.14570	OG5_131576	axoneme	Cytoplasm	ND	FALSE	FALSE	FALSE	FALSE	FALSE	FALSE	FALSE	FALSE	FALSE	FALSE	axoneme	N/A	N/A
Tb927.10.14580	Q385T6	NA	60S ribosomal protein L17, putative	0.00259051	0.730692	0.000405756	0.258258	0.891553	0.0716322	0.000943334	0.207604	0.0979545	0.613333	0.0479766	0.73121	0.352084	-2.53	-0.259	-3.1	0.863	-0.103	-1.41	-2.84	-0.966	1.29	-0.381	-1.56	0.259	-0.707	Tb927.10.14580	OG5_126900	endoplasmic reticulum	Cytoplasm	ND	FALSE	FALSE	FALSE	FALSE	FALSE	FALSE	FALSE	FALSE	FALSE	FALSE	cytoplasm	structural constituent of ribosome	cytoplasmic translation
Tb927.10.14630	Q388E0	NA	fibrillarin, putative	0.00237194	0.0188007	0.00152823	0.54872	0.559668	0.773051	0.289717	0.986797	0.00367596	0.634813	0.000270803	0.00572649	0.00550827	-1.67	-1.24	-1.76	0.296	0.288	-0.142	-0.528	-0.00814	-1.58	-0.234	-2.11	-1.49	-1.5	Tb927.10.14630	OG5_127191	nucleolus(strong), nucleus(points, weak)	Mitochondrion	ND	FALSE	FALSE	FALSE	FALSE	FALSE	FALSE	FALSE	FALSE	FALSE	FALSE	Cajal body	RNA binding	box C/D RNA 3'-end processing
Tb927.10.14680	Q388D6	NA	ribosome biogenesis protein, putative	0.0496887	0.0444585	0.0401186	0.242307	0.683937	0.00651325	0.960557	0.120853	0.0103043	0.0350856	0.00919846	0.0229102	0.000530746	-1.25	1.29	1.32	0.724	-0.249	-1.81	0.0301	-0.973	1.69	1.35	1.72	-1.48	-2.45	Tb927.10.14680	OG5_127903	nucleolus	Nucleus	ND	FALSE	FALSE	FALSE	FALSE	FALSE	FALSE	FALSE	FALSE	FALSE	FALSE	nucleolus	rRNA binding	ribosomal large subunit assembly
Tb927.10.14700	Q388D4	NA	hypothetical protein, conserved	0.00134354	0.899958	0.948522	0.688772	0.243044	0.000370458	0.849135	0.122743	0.085478	0.000158216	0.0588328	0.161094	0.878245	1.62	-0.056	0.0287	0.179	-0.528	1.85	0.0847	-0.706	0.793	2.01	0.877	0.638	-0.0682	Tb927.10.14700	OG5_148222	cytoplasm(patchy)	Nucleus	91-110	TRUE	FALSE	FALSE	FALSE	FALSE	FALSE	FALSE	FALSE	TRUE	FALSE	cytoplasm	mRNA binding	N/A
Tb927.10.14710	Q388D3	RPS2	40S ribosomal protein S2, putative	9.71189e-06	0.00058615	2.13597e-05	0.805743	0.887136	0.15838	0.18319	0.917073	0.992369	0.248387	0.186166	0.793443	0.714655	-3.02	-2.12	-2.84	0.131	0.0756	-0.77	-0.724	-0.0555	0.0051	-0.625	-0.719	-0.14	-0.195	RPS2	OG5_126722	ND	Nucleus	1-56	FALSE	FALSE	FALSE	FALSE	FALSE	FALSE	FALSE	FALSE	FALSE	FALSE	cytoplasm	structural constituent of ribosome	translation
Tb927.10.14770	Q388C7	AKB1	Associated kinase of Tb14-3-3	0.0237934	0.907005	0.703525	0.0181979	0.277475	0.99592	0.619467	0.00137645	0.239223	0.0169095	0.487445	0.183893	4.99226e-05	1.26	-0.061	0.199	-1.32	0.575	-0.00267	0.26	1.89	-0.625	-1.34	-0.365	0.709	2.6	AKB1	OG5_151372	ND	Cytoplasm	113-122;499-518;537-556	FALSE	FALSE	FALSE	FALSE	FALSE	FALSE	FALSE	FALSE	FALSE	FALSE	ciliary basal body	ATP binding	intracellular signal transduction
Tb927.10.14830	Q388C4	MCP5b	Mitochondrial ADP/ATP carrier protein 5b	0.2129	0.0299673	0.110347	0.0417577	0.840193	0.163473	0.517193	0.0629728	0.116122	0.045569	0.338684	0.0671737	0.000812858	-1.12	2.02	1.45	1.88	0.178	-1.26	-0.573	-1.71	1.42	1.85	0.852	-1.68	-3.38	MCP5b	OG5_126841	ND	Mitochondrion	ND	FALSE	TRUE	FALSE	FALSE	FALSE	FALSE	FALSE	FALSE	FALSE	FALSE	mitochondrial inner membrane	N/A	transport
Tb927.10.14870	Q388B9	NA	hypothetical protein, conserved	0.000115335	0.294131	0.898909	0.541675	0.938815	3.86178e-05	0.354267	0.492767	0.0170512	0.107461	0.115933	0.000342986	6.34679e-05	-1.96	0.45	0.0538	0.26	-0.0325	-2.15	-0.396	-0.292	1.08	0.703	0.685	-1.78	-2.07	Tb927.10.14870	OG5_148500	cytoplasm, nucleus(points), flagellar cytoplasm, nuclear lumen	Nucleus	624-681	FALSE	FALSE	FALSE	FALSE	FALSE	FALSE	FALSE	FALSE	FALSE	FALSE	ciliary plasm	N/A	N/A
Tb927.10.14890	Q388B7	KIFC1	C-terminal motor kinesin, putative	0.238285	0.325416	0.908691	0.445017	0.906782	0.00672053	0.383145	0.379885	0.182296	0.40252	0.630621	0.452456	0.896749	-0.67	0.556	0.0641	-0.43	0.0655	-1.66	-0.492	0.495	0.762	-0.472	0.27	-0.423	0.0726	KIFC1	OG5_126975	ND	Cytoplasm	365-383;442-452	FALSE	FALSE	FALSE	FALSE	FALSE	FALSE	FALSE	FALSE	FALSE	FALSE	cytoplasm	ATP binding	cytoskeleton-dependent intracellular transport
Tb927.10.1490	Q38C92	MKT1L	Temperature dependent protein affecting M2 dsRNA replication, putative	0.00631528	0.0572528	0.688164	0.460851	0.419973	0.793666	0.123756	0.130241	0.00404861	0.0060074	0.121169	0.668513	0.0573989	1.77	1.18	0.238	-0.44	0.481	0.155	-0.938	0.921	1.88	1.78	0.945	0.254	1.18	MKT1L	OG5_139047	ND	Cytoplasm	5-97;122-131;207-309	FALSE	TRUE	FALSE	FALSE	FALSE	FALSE	FALSE	FALSE	FALSE	FALSE	interchromatin granule	5'-flap endonuclease activity	response to drug
Tb927.10.14990	Q388A9	IFT80	intraflagellar transport protein 80	0.00516731	0.584289	0.0241983	0.140484	0.21108	0.316727	0.0753442	0.811596	0.0711439	9.08413e-06	0.00108982	0.00965641	0.0165741	2.12	0.379	1.66	-1.04	-0.88	0.7	1.28	0.165	1.3	3.93	2.57	-1.94	-1.77	IFT80	OG5_129685	intraflagellar transport particle, cytoplasm(weak)	Cytoplasm	ND	FALSE	TRUE	FALSE	FALSE	FALSE	FALSE	FALSE	FALSE	FALSE	FALSE	centrosome	N/A	cilium assembly
Tb927.10.1510	Q38C90	NOT1	CCR4-NOT transcription complex subunit 1	0.0204301	0.209663	0.180282	0.686717	0.751398	0.120223	0.927806	0.930744	0.104285	0.00371881	0.0878949	0.95087	0.979816	1.83	0.947	1.01	0.299	0.235	1.18	0.0671	-0.0644	1.24	2.38	1.31	0.0456	-0.0187	NOT1	OG5_128127	ND	Cytoplasm	178-191;389-408;1129-1159;1627-1649;1723-1775	FALSE	TRUE	FALSE	FALSE	FALSE	FALSE	FALSE	FALSE	FALSE	FALSE	CCR4-NOT core complex	molecular adaptor activity	negative regulation of translation
Tb927.10.15380	Q387X5	NA	U3 snoRNA-associated protein UTP11, putative	0.620355	0.372896	0.0175212	0.0144527	0.535663	0.225839	0.110903	0.00340424	0.0222799	6.6529e-05	0.000458595	0.238045	0.000183436	-0.284	0.515	1.46	1.5	-0.356	0.706	0.941	-1.86	1.39	2.79	2.33	-0.687	-2.55	Tb927.10.15380	OG5_128132	ND	Nucleus	281-290	FALSE	FALSE	FALSE	FALSE	FALSE	FALSE	FALSE	FALSE	FALSE	FALSE	nucleolus	N/A	rRNA processing
Tb927.10.15440	Q387W9	NA	hypothetical protein, conserved	0.00473684	0.0119733	0.00308557	0.515768	0.35374	0.800125	0.563378	0.122236	0.0531707	0.00507434	0.0153438	0.197622	0.782734	1.95	1.7	2.07	-0.41	0.588	-0.159	0.364	0.999	1.27	1.94	1.63	-0.825	0.173	Tb927.10.15440	OG5_148507	ND	Cytoplasm	ND	FALSE	FALSE	FALSE	FALSE	FALSE	FALSE	FALSE	FALSE	FALSE	FALSE	bilobe structure	N/A	N/A
Tb927.10.15520	Q387W1	NA	signal recognition particle protein, putative	0.000909866	0.101277	0.083932	0.474184	0.744959	0.175431	0.92113	0.69387	0.000501995	7.40178e-06	0.000393784	0.721102	0.970641	2.39	1.06	1.13	-0.453	-0.205	0.872	0.0623	0.248	2.54	3.64	2.61	-0.225	0.0232	Tb927.10.15520	OG5_128517	cytoplasm(strong, <10%), cytoplasm(weak, 75%)	Nucleus	398-409;606-615	FALSE	FALSE	FALSE	FALSE	FALSE	FALSE	FALSE	FALSE	FALSE	FALSE	cytoplasm	7S RNA binding	SRP-dependent cotranslational protein targeting to membrane
Tb927.10.15660	Q387U8	NA	hypothetical protein, conserved	0.0180311	0.691675	0.738893	0.269014	0.845273	0.317795	0.467511	0.359125	0.429828	0.359803	0.137059	0.261229	0.0485347	0.903	0.142	-0.119	-0.4	-0.0697	0.361	-0.261	0.331	-0.284	-0.33	-0.545	0.407	0.738	Tb927.10.15660	OG5_162243	ND	Nucleus	135-144;186-196;220-229;549-558	FALSE	FALSE	FALSE	FALSE	FALSE	FALSE	TRUE	FALSE	FALSE	FALSE	kinetoplast	N/A	N/A
Tb927.10.15760	Q387T8	CAP36	Cytoskeleton-associated protein 36 kDa	4.50222e-05	0.137051	0.236029	0.71074	0.00680355	0.00455202	0.748061	0.0159073	0.621216	0.0065437	0.861942	0.517765	0.0632051	3.21	0.974	0.769	-0.237	-1.89	2	-0.205	-1.65	0.316	1.9	0.111	0.415	-1.24	CAP36	OG5_147632	ND	Nucleus	83-110	FALSE	FALSE	FALSE	FALSE	FALSE	FALSE	FALSE	FALSE	FALSE	FALSE	cortical cytoskeleton	N/A	mitotic cleavage furrow ingression
Tb927.10.16120	P50098	NA	NA	0.144681	0.156466	0.756326	0.360691	0.754406	0.000760256	0.261158	0.543669	0.00297049	0.717172	0.0394036	0.841878	0.682154	-0.783	0.759	0.163	-0.483	-0.164	-2.02	-0.597	0.319	1.73	-0.19	1.13	-0.104	0.215	Tb927.10.16120	OG5_126887	cytoplasm, flagellar cytoplasm	Peroxisome	ND	FALSE	TRUE	TRUE	FALSE	FALSE	FALSE	FALSE	FALSE	FALSE	FALSE	ciliary plasm	IMP dehydrogenase activity	purine ribonucleotide biosynthetic process
Tb927.10.1630	Q38C78	ABCE1	atp-binding cassette sub-family e member 1	0.00292555	0.0789745	0.0100137	0.309739	0.806954	0.64383	0.338432	0.436493	0.00338166	1.31442e-05	0.000321657	0.0790348	0.30511	1.68	0.922	1.41	-0.52	-0.124	0.234	0.489	0.396	1.65	2.8	2.14	-0.922	-0.525	ABCE1	OG5_127149	cytoplasm	Nucleus	618-631	FALSE	FALSE	FALSE	FALSE	FALSE	FALSE	FALSE	FALSE	FALSE	FALSE	ciliary plasm	ATP binding	nuclear-transcribed mRNA catabolic process, exonucleolytic
Tb927.10.190	Q38CL9	NA	40S ribosomal protein S6, putative	0.131866	0.751799	0.0988832	0.791805	0.828023	0.338694	0.0532304	0.63106	0.370922	0.992561	0.00734278	0.956473	0.593118	0.562	0.115	-0.618	-0.0958	0.0788	0.351	-0.733	0.175	-0.328	0.00338	-1.06	0.0198	0.194	Tb927.10.190	OG5_126964	ND	Cytoplasm	217-230	FALSE	FALSE	FALSE	FALSE	FALSE	FALSE	FALSE	FALSE	FALSE	FALSE	ribosome	mRNA binding	regulation of cell growth
Tb927.10.2010	Q38C42	HK1	hexokinase	0.0512191	0.0119064	0.0541392	0.762532	0.873428	0.710638	0.485575	0.886215	0.0123834	5.82309e-06	0.0560665	0.0016224	0.00114597	1.35	1.8	1.33	0.201	0.106	-0.246	-0.465	-0.0949	1.79	3.9	1.32	-2.36	-2.46	HK1	OG5_126743	ND	Cytoplasm	ND	FALSE	FALSE	FALSE	FALSE	FALSE	FALSE	FALSE	FALSE	FALSE	FALSE	cytosol	fructokinase activity	carbohydrate metabolic process
Tb927.10.2090	P86939	NA	NA	0.000344234	0.000693909	0.000610205	0.806536	0.743903	0.967312	0.958116	0.568689	0.727616	0.276091	0.767253	0.429027	0.18023	-1.67	-1.55	-1.57	0.0974	-0.13	-0.0163	-0.0209	-0.227	0.139	0.439	0.118	-0.317	-0.544	Tb927.10.2090	OG5_126631	cytoplasm	Cytoplasm	ND	FALSE	FALSE	FALSE	FALSE	FALSE	FALSE	FALSE	FALSE	FALSE	FALSE	cytoplasm	GTPase activity	calcium-mediated signaling
Tb927.10.220	Q38AW9	NA	60S ribosomal protein L37a, putative	0.517839	0.375257	0.525342	0.999754	0.155083	0.132543	0.797502	0.155	0.0267027	0.0431395	0.0459202	0.19611	0.890214	-0.657	0.905	0.645	-0.000312	1.47	-1.56	-0.26	1.47	2.38	2.15	2.12	-1.33	0.14	Tb927.10.220	OG5_127166	ND	Cytoplasm	ND	FALSE	FALSE	FALSE	FALSE	FALSE	FALSE	FALSE	FALSE	FALSE	FALSE	cytoplasm	structural constituent of ribosome	translation
Tb927.10.2240	Q38C20	NA	RNA binding protein	0.00249705	0.706845	0.883302	0.162948	0.686783	3.0701e-05	0.818279	0.0775551	0.736659	0.013828	0.914937	0.0368025	0.713289	1.26	-0.14	-0.0546	0.531	-0.15	1.93	0.0854	-0.681	-0.125	0.984	-0.0397	0.818	0.137	Tb927.10.2240	OG5_150754	cytoplasm	Nucleus	165-202;404-425;471-482	FALSE	TRUE	FALSE	FALSE	FALSE	FALSE	FALSE	FALSE	FALSE	FALSE	cytoplasm	mRNA binding	posttranscriptional regulation of gene expression
Tb927.10.2290	Q38C15	J3	chaperone protein DnaJ, putative	0.0202855	0.0312019	0.0331543	0.188398	0.365465	0.133494	0.977245	0.0326557	0.000102693	3.43624e-06	0.000110104	0.906545	0.0417991	1.33	1.22	1.21	0.72	-0.49	0.826	-0.0153	-1.21	2.51	3.28	2.5	0.063	-1.15	J3	OG5_126883	nucleolus(75%), cytoplasm(weak), nucleoplasm(weak), basal body(50%)	Cytoplasm	95-104;369-389	FALSE	FALSE	FALSE	FALSE	FALSE	FALSE	FALSE	FALSE	FALSE	FALSE	ciliary basal body	chaperone binding	protein folding
Tb927.10.2440	Q38C01	MCA4	Metacaspase-4	0.000395957	0.0206586	0.206685	0.380357	0.107574	0.436747	0.245041	0.441953	0.000516616	4.0781e-05	0.00879007	0.798199	0.308857	2.89	1.72	0.899	-0.619	-1.16	0.547	-0.826	-0.541	2.82	3.54	1.99	-0.179	-0.72	MCA4	OG5_182511	ND	Cell_membrane	ND	FALSE	FALSE	FALSE	FALSE	FALSE	FALSE	TRUE	FALSE	TRUE	FALSE	ciliary membrane	cysteine-type endopeptidase activity	proteolysis
Tb927.10.2580	Q38BY7	NA	Nucleolar protein 12 (25kDa), putative	5.01445e-06	0.0717375	0.257148	0.640614	0.845152	2.15138e-07	0.00584478	0.785309	0.0172525	0.0874648	0.637224	0.00569656	0.00298455	-3.74	1.18	-0.724	0.294	0.123	-4.62	-1.9	-0.171	1.6	-1.11	-0.297	-1.91	-2.08	Tb927.10.2580	OG5_152066	nucleolus	Nucleus	16-25;271-290	FALSE	FALSE	FALSE	FALSE	FALSE	FALSE	FALSE	FALSE	FALSE	FALSE	nucleolus	RNA binding	N/A
Tb927.10.2700	Q38BX5	NA	predicted WD40 repeat protein	0.718385	0.000807119	0.00536001	0.260596	0.694599	0.027149	0.434821	0.134897	1.73618e-05	2.1738e-05	0.000116494	0.0331937	0.000938549	0.191	2.04	1.62	0.604	-0.208	-1.24	-0.416	-0.813	2.87	2.82	2.45	-1.19	-2	Tb927.10.2700	OG5_128227	ND	Nucleus	664-689	FALSE	TRUE	FALSE	FALSE	FALSE	FALSE	FALSE	FALSE	FALSE	FALSE	nucleolus	snoRNA binding	N/A
Tb927.10.2890	Q9NDH8	NA	NA	1.28115e-05	1.02961e-06	1.25932e-06	0.994182	0.313145	0.27925	0.928734	0.309782	0.00235849	0.0530945	0.00292321	0.776345	0.1981	-2.37	-2.84	-2.8	0.00312	-0.436	0.469	0.0382	-0.44	-1.46	-0.865	-1.42	-0.122	-0.561	Tb927.10.2890	OG5_126698	nucleoplasm, cytoplasm	Cytoplasm	115-124	FALSE	FALSE	FALSE	FALSE	FALSE	FALSE	FALSE	FALSE	FALSE	FALSE	ciliary plasm	magnesium ion binding	glycolytic process
Tb927.10.3150	Q38BT1	NA	N-acetyltransferase, putative	0.000204398	0.123914	0.290751	0.471361	0.826653	0.0454052	0.609794	0.614221	0.015942	3.50005e-05	0.0479066	0.655935	0.95296	2.81	1.01	0.684	-0.463	-0.14	1.34	-0.327	0.323	1.65	3.28	1.32	-0.285	0.0377	Tb927.10.3150	OG5_128600	cytoplasm(patchy)	Nucleus	193-205	FALSE	FALSE	FALSE	FALSE	FALSE	FALSE	FALSE	FALSE	FALSE	FALSE	NatA complex	N-acetyltransferase activity	histone acetylation
Tb927.10.3210	Q38BS5	NA	delta-1-pyrroline-5-carboxylate dehydrogenase, putative	0.000100264	0.0188784	0.0994328	0.610333	0.593553	0.0123149	0.423081	0.301365	0.00467731	6.32503e-05	0.0291372	0.357102	0.907292	2.84	1.52	1.03	0.309	-0.324	1.63	-0.488	-0.633	1.88	2.95	1.4	0.562	-0.0704	Tb927.10.3210	OG5_128522	kinetoplast, mitochondrion	Mitochondrion	ND	FALSE	FALSE	FALSE	FALSE	FALSE	FALSE	FALSE	FALSE	FALSE	FALSE	cytoplasm	1-pyrroline-5-carboxylate dehydrogenase activity	proline catabolic process
Tb927.10.3260	Q38BS1	LACS5	Long-chain-fatty-acid--CoA ligase 5 (EC 6.2.1.3) (Long-chain acyl-CoA synthetase 5) (LACS 5), putative	0.0737033	0.0526705	0.0281052	0.775681	0.407418	0.907121	0.764369	0.583679	0.00794966	0.000147509	0.00393063	0.135626	0.331337	1.23	1.34	1.54	0.189	0.554	0.0774	0.199	0.365	1.92	3.01	2.11	-1.02	-0.651	LACS5	OG5_126601	flagellar pocket(ring), plasma membrane	Cell_membrane	ND	FALSE	FALSE	FALSE	FALSE	FALSE	FALSE	FALSE	FALSE	FALSE	FALSE	ciliary plasm	catalytic activity	fatty acid elongation
Tb927.10.3660	Q38BN3	cASAT	aspartate aminotransferase	0.234837	0.010013	0.0255503	0.382765	0.492466	0.0208943	0.675497	0.848994	0.00703294	0.129157	0.0182729	0.286901	0.37846	0.742	1.71	1.46	-0.541	-0.424	-1.51	-0.258	0.117	1.81	0.957	1.55	-0.663	-0.546	cASAT	OG5_126737	cytoplasm, flagellar cytoplasm	Peroxisome	ND	FALSE	FALSE	FALSE	FALSE	FALSE	FALSE	FALSE	FALSE	FALSE	FALSE	ciliary plasm	L-aspartate:2-oxoglutarate aminotransferase activity	L-methionine salvage from methylthioadenosine
Tb927.10.3760	Q38BM3	NA	vacuolar ATP synthase subunit d, putative	0.00163969	0.0450747	0.0113146	0.110355	0.660145	0.00489417	0.52791	0.235957	0.00298283	3.84549e-05	0.000640517	0.198137	0.914515	2.28	1.35	1.75	1.05	0.282	1.98	0.406	-0.772	2.12	3.26	2.52	0.841	0.0688	Tb927.10.3760	OG5_127301	cytoplasm(reticulated)	Nucleus	252-263	FALSE	FALSE	FALSE	FALSE	FALSE	FALSE	FALSE	FALSE	FALSE	FALSE	cytoplasm	P-type proton-exporting transporter activity	proton transmembrane transport
Tb927.10.3840	Q382C4	NA	60S ribosomal protein L18a, putative	0.157389	0.550282	0.742793	0.701727	0.989467	0.226102	0.786354	0.692016	0.540783	0.284709	0.380163	0.0994346	0.200629	-0.628	-0.26	-0.143	-0.167	0.00573	-0.535	0.118	0.172	0.267	0.471	0.384	-0.739	-0.566	Tb927.10.3840	OG5_127130	cytoplasm(patchy)	Cytoplasm	ND	FALSE	FALSE	FALSE	FALSE	FALSE	FALSE	FALSE	FALSE	FALSE	FALSE	cytoplasm	mRNA binding	translation
Tb927.10.3930	Q38BK7	NA	40S ribosomal protein S3A, putative	0.0013162	0.508316	0.00322033	0.63972	0.792347	0.0187919	0.0150971	0.83701	0.711769	0.103538	0.033875	0.645766	0.507222	-1.47	-0.267	-1.32	0.189	0.106	-1.01	-1.05	-0.0828	0.149	-0.676	-0.901	-0.185	-0.268	Tb927.10.3930	OG5_126852	cytoplasm(patchy)	Nucleus	10-20	FALSE	FALSE	FALSE	FALSE	FALSE	FALSE	FALSE	FALSE	FALSE	FALSE	cytoplasm	mRNA binding	translation
Tb927.10.3990	Q38BK1	DHH1	DHH1	1.60446e-06	0.00228783	0.000519897	0.534468	0.967596	0.0012984	0.544378	0.561179	0.0290723	5.30062e-05	0.00742659	0.321684	0.675725	-2.94	-1.56	-1.83	-0.284	-0.0185	-1.66	-0.277	0.266	-1.05	-2.26	-1.33	-0.457	-0.191	DHH1	OG5_127804	ND	Cytoplasm	ND	FALSE	TRUE	FALSE	FALSE	FALSE	FALSE	FALSE	FALSE	FALSE	FALSE	P-body	ATP binding	P-body assembly
Tb927.10.4110	Q38BI8	NA	NA	0.252033	0.742415	0.254174	0.921854	0.379142	0.172603	0.410914	0.433194	0.140421	0.0721104	0.0272072	0.0906449	0.341594	-0.854	0.241	0.85	0.072	0.651	-1.02	0.608	0.579	1.11	1.37	1.72	-1.28	-0.705	Tb927.10.4110	OG5_127005	cytoplasm(patchy)	Cytoplasm	ND	FALSE	FALSE	FALSE	FALSE	FALSE	FALSE	FALSE	FALSE	FALSE	FALSE	cytoplasm	RNA binding	translation
Tb927.10.4180	Q38BI2	NA	TFIIF-stimulated CTD phosphatase, putative	0.0179868	4.51101e-05	0.00907698	0.794263	0.518937	0.0108327	0.0373657	0.699134	1.02809e-06	1.07233e-06	0.000184556	0.0113061	0.00459775	1.28	2.55	1.43	-0.132	-0.328	-1.4	-1.11	-0.196	3.36	3.35	2.25	-1.39	-1.58	Tb927.10.4180	OG5_151814	ND	Nucleus	ND	FALSE	FALSE	FALSE	FALSE	FALSE	FALSE	FALSE	FALSE	FALSE	FALSE	ciliary plasm	phosphoprotein phosphatase activity	N/A
Tb927.10.450	Q38CJ3	CMF62	Component of motile flagella 62	7.71816e-05	0.0174655	0.0977342	0.0320439	0.131154	0.996195	0.408584	0.477671	0.600902	0.00117892	0.758128	0.00412149	0.0212072	2.06	1.09	0.734	-0.972	-0.666	-0.00205	-0.358	0.307	0.225	1.58	-0.132	-1.36	-1.05	CMF62	OG5_130500	ND	Nucleus	97-413	FALSE	FALSE	FALSE	FALSE	FALSE	FALSE	FALSE	FALSE	TRUE	TRUE	ciliary basal body	N/A	cilium-dependent cell motility
Tb927.10.4570	Q38BE4	NA	elongation factor 2	0.208902	0.856924	0.955231	0.563312	0.817022	0.604381	0.901159	0.42051	0.885863	0.599382	0.984557	0.891585	0.348116	-1.16	-0.164	-0.0509	0.526	-0.21	-0.471	0.113	-0.736	-0.13	-0.478	-0.0175	-0.124	-0.86	Tb927.10.4570	OG5_126923	ND	Cytoplasm	ND	FALSE	TRUE	FALSE	FALSE	FALSE	FALSE	FALSE	FALSE	FALSE	FALSE	ciliary plasm	GTP binding	translation
Tb927.10.4610	Q5QQ41	NA	NA	0.785712	0.851057	0.429977	0.100152	0.815354	0.0401894	0.331056	0.15297	0.0867181	0.000372296	0.0108082	0.818235	0.100852	0.174	-0.12	0.51	1.09	0.15	1.38	0.63	-0.939	1.14	2.67	1.77	-0.147	-1.09	Tb927.10.4610	OG5_127079	ND	Endoplasmic_reticulum	241-250	FALSE	FALSE	FALSE	FALSE	FALSE	TRUE	FALSE	FALSE	FALSE	FALSE	endoplasmic reticulum	dolichyl-phosphate beta-D-mannosyltransferase activity	GPI anchor biosynthetic process
Tb927.10.5030	Q38B98	NA	ubiquitin/ribosomal protein S27a, putative	9.71177e-08	0.168893	0.00200895	0.751597	0.459183	4.41868e-06	0.048836	0.669258	0.297252	0.00026166	0.00465056	0.0109005	0.0282013	-4.63	-0.842	-2.08	0.19	0.446	-3.59	-1.24	0.256	-0.632	-2.58	-1.87	-1.65	-1.39	Tb927.10.5030	OG5_127221	cytoplasm(patchy)	Nucleus	67-89	FALSE	FALSE	FALSE	FALSE	FALSE	FALSE	FALSE	FALSE	FALSE	FALSE	cytoplasm	heme binding	modification-dependent protein catabolic process
Tb927.10.5140	Q38B88	MPK6	Mitogen-activated protein kinase 6	0.00376988	0.00109177	0.0119925	0.298348	0.0464582	0.127339	0.317811	0.00441623	1.86087e-05	0.000413805	0.000216573	0.770056	0.00875334	1.58	1.83	1.34	-0.519	1.03	-0.772	-0.498	1.55	2.66	2.03	2.16	-0.144	1.4	MPK6	OG5_129442	cell tip(posterior), cytoplasm	Cytoplasm	381-421	FALSE	FALSE	FALSE	FALSE	FALSE	TRUE	FALSE	FALSE	FALSE	FALSE	cell tip	ATP binding	intracellular signal transduction
Tb927.10.5300	Q38B73	NA	eukaryotic translation initiation factor 6 (eIF-6), putative	0.799641	0.0539033	0.261477	0.876542	0.855157	0.0440475	0.385629	0.978287	0.00476051	0.00454992	0.0342309	0.0423336	0.0447881	-0.17	1.35	0.761	0.104	0.122	-1.41	-0.584	0.0182	2.08	2.09	1.49	-1.42	-1.41	Tb927.10.5300	OG5_127488	nucleolus	Cytoplasm	ND	FALSE	FALSE	FALSE	FALSE	FALSE	FALSE	FALSE	FALSE	FALSE	FALSE	cytosol	ribosomal large subunit binding	assembly of large subunit precursor of preribosome
Tb927.10.5340	Q38B69	RPS18	40S ribosomal protein S18, putative	0.31824	0.0609467	0.57004	0.129674	0.731046	0.54158	0.175684	0.0676595	0.0190669	0.00747551	0.26942	0.84103	0.0995932	0.872	1.69	0.492	1.35	-0.297	0.53	-1.2	-1.64	2.16	2.52	0.968	0.173	-1.47	RPS18	OG5_126668	ND	Cytoplasm	ND	FALSE	FALSE	FALSE	FALSE	FALSE	FALSE	FALSE	FALSE	FALSE	FALSE	cytoplasm	RNA binding	translation
Tb927.10.5370	Q38B66	NA	40S ribosomal protein S10, putative	0.0864981	0.179177	0.115799	0.156096	0.900513	0.299983	0.80486	0.193196	0.0219793	0.0128484	0.0126664	0.205382	0.970566	1.46	1.13	1.34	-1.2	-0.103	-0.866	0.204	1.09	2.01	2.21	2.22	-1.06	0.0304	Tb927.10.5370	OG5_127137	cytoplasm(points)	Nucleus	89-172	FALSE	FALSE	FALSE	FALSE	FALSE	FALSE	FALSE	FALSE	FALSE	FALSE	cytoplasm	RNA binding	ribosomal small subunit assembly
Tb927.10.540	Q38CI6	SUB2	ATP-dependent RNA helicase SUB2, putative	0.000777023	0.0105911	0.0625353	0.0262486	0.0175107	0.215039	0.413369	0.853655	0.00568779	0.00808025	0.0360678	0.272947	0.203405	2.66	1.9	1.34	-1.62	-1.75	-0.869	-0.567	-0.127	2.09	1.98	1.52	-0.765	-0.892	SUB2	OG5_127438	nucleoplasm	Cytoplasm	ND	FALSE	TRUE	FALSE	FALSE	FALSE	FALSE	FALSE	FALSE	FALSE	FALSE	nucleoplasm	ATP binding	mRNA metabolic process
Tb927.10.5460	Q38B58	NA	60S ribosomal protein L24, putative	0.322306	0.329139	0.0113641	0.671087	0.447758	0.681526	0.0911223	0.241701	0.694994	0.147257	0.184471	0.497643	0.0717362	-0.444	-0.438	-1.21	0.189	-0.339	0.182	-0.776	-0.528	0.174	0.659	-0.601	-0.303	-0.831	Tb927.10.5460	OG5_127273	cytoplasm(patchy)	Mitochondrion	ND	FALSE	FALSE	FALSE	FALSE	FALSE	FALSE	FALSE	FALSE	FALSE	FALSE	cytoplasm	RNA binding	assembly of large subunit precursor of preribosome
Tb927.10.560	Q38CI4	NA	40S ribosomal proteins S11, putative	0.389423	0.735247	0.887141	0.0713165	0.934098	0.506386	0.631748	0.0605361	0.73497	0.12752	0.416119	0.0684593	0.950634	-0.899	0.35	-0.147	1.94	-0.0856	0.691	-0.497	-2.03	-0.351	-1.62	-0.848	1.96	-0.0641	Tb927.10.560	OG5_126986	cytoplasm(patchy, 75%)	Cytoplasm	ND	FALSE	FALSE	FALSE	FALSE	FALSE	FALSE	FALSE	FALSE	FALSE	FALSE	cytoplasm	mRNA binding	translation
Tb927.10.5610	Q57VP3	NA	40S ribosomal protein S9, putative	0.352918	0.836913	0.587879	0.544588	0.823196	0.0902578	0.456365	0.409134	0.0455776	0.160478	0.186871	0.281253	0.794774	-0.673	0.148	-0.39	-0.436	0.16	-1.26	-0.538	0.597	1.5	1.03	0.966	-0.783	-0.187	Tb927.10.5610	OG5_126983	cytoplasm(reticulated)	Cytoplasm	ND	FALSE	FALSE	FALSE	FALSE	FALSE	FALSE	FALSE	FALSE	FALSE	FALSE	ciliary plasm	RNA binding	positive regulation of translational fidelity
Tb927.10.5620	Q38B42	ALD	fructose-bisphosphate aldolase, glycosomal	0.161191	0.151649	0.00207349	0.14502	0.374147	0.136272	0.0569	0.0244163	0.635169	0.313951	0.140462	0.329457	0.16936	0.491	0.503	1.18	-0.512	0.307	-0.524	0.681	0.819	-0.163	-0.349	0.518	-0.338	0.482	ALD	OG5_127143	ND	Cytoplasm	ND	FALSE	FALSE	FALSE	FALSE	FALSE	FALSE	FALSE	FALSE	FALSE	FALSE	cytosol	fructose-bisphosphate aldolase activity	fructose 1,6-bisphosphate metabolic process
Tb927.10.5770	Q38B27	VCP	Valosin-containing protein	0.0396989	0.310608	0.241126	0.532926	0.106514	0.0884116	0.868943	0.0303154	0.122897	0.0135934	0.0904099	0.489539	0.120827	1.84	0.874	1.01	0.533	-1.42	1.5	0.14	-1.95	1.35	2.26	1.49	0.592	-1.36	VCP	OG5_126926	nucleoplasm(50%), cytoplasm(50%)	Cytoplasm	764-777	FALSE	TRUE	FALSE	FALSE	FALSE	FALSE	FALSE	FALSE	FALSE	FALSE	VCP-NPL4-UFD1 AAA ATPase complex	ATP hydrolysis activity	ER-associated misfolded protein catabolic process
Tb927.10.5920	Q38B12	NA	hypothetical protein, conserved	0.603432	0.0119617	0.010213	0.943521	0.844883	0.032268	0.944771	0.900629	0.00157687	0.000900899	0.00133283	0.0195929	0.0148359	0.317	1.65	1.69	-0.0431	-0.119	-1.38	0.0422	-0.076	2.17	2.31	2.21	-1.52	-1.59	Tb927.10.5920	OG5_149072	ND	Nucleus	ND	FALSE	FALSE	FALSE	FALSE	FALSE	FALSE	FALSE	FALSE	FALSE	FALSE	nucleolus	N/A	N/A
Tb927.10.6000	Q38B05	NA	hypothetical protein, conserved	0.000193925	0.129924	0.171788	0.0877879	0.333492	0.276362	0.87359	0.433087	0.0267403	0.00106451	0.0375311	0.780604	0.610554	3.3	1.16	1.04	-1.32	-0.73	0.824	-0.119	0.589	1.75	2.78	1.63	-0.208	0.381	Tb927.10.6000	OG5_148110	ND	Cytoplasm	ND	FALSE	FALSE	FALSE	FALSE	FALSE	FALSE	FALSE	FALSE	FALSE	FALSE	N/A	N/A	N/A
Tb927.10.6050	Q38B01	CHC	clathrin heavy chain	0.000732133	0.00040658	0.0594474	0.291493	0.361328	6.42227e-09	3.58906e-06	0.0566294	0.000212689	0.0029324	0.0993088	0.177748	0.541245	-1.89	2	-0.954	-0.519	0.447	-4.41	-2.96	0.966	2.13	-1.61	-0.826	-0.668	0.298	CHC	OG5_127480	endocytic, cell tip(posterior)	Cytoplasm	ND	FALSE	TRUE	FALSE	FALSE	FALSE	FALSE	FALSE	FALSE	FALSE	FALSE	cell tip	clathrin light chain binding	receptor-mediated endocytosis
Tb927.10.6220	Q38AY4	XRND	5'-3' exoribonuclease D	0.0255105	0.00923735	0.00135415	0.866982	0.382223	0.536171	0.422532	0.300185	4.81082e-05	5.40158e-07	6.97894e-06	0.0171573	0.142955	1.1	1.31	1.69	-0.0779	0.41	-0.289	0.376	0.488	2.32	3.22	2.7	-1.19	-0.699	XRND	OG5_126774	nucleolus(25%), nucleoplasm(points, 25%)	Nucleus	65-74	FALSE	TRUE	FALSE	FALSE	FALSE	FALSE	FALSE	FALSE	FALSE	FALSE	nucleolus	5'-3' exoribonuclease activity	RNA processing
Tb927.10.6260	Q38AY0	NA	ATP-dependent DEAD/H RNA helicase, putative	0.677793	0.0329323	0.025483	0.999318	0.302242	0.076786	0.904887	0.302628	0.000879582	2.28497e-05	0.00065673	0.00279003	0.00021907	0.265	1.43	1.51	-0.000544	-0.666	-1.17	0.0761	-0.665	2.43	3.38	2.5	-2.12	-2.79	Tb927.10.6260	OG5_128169	ND	Nucleus	15-24;44-53	FALSE	FALSE	FALSE	FALSE	FALSE	FALSE	FALSE	FALSE	FALSE	FALSE	nucleolus	ATP binding	maturation of LSU-rRNA from tricistronic rRNA transcript (SSU-rRNA, 5.8S rRNA, LSU-rRNA)
Tb927.10.6400	Q38AV5	HSP60	chaperonin HSP60, mitochondrial precursor	0.00277246	0.0412873	0.237943	0.0351649	0.40057	0.309077	0.349576	0.00523621	0.445671	0.0458473	0.859381	0.0774475	6.09297e-05	-1.65	-1.06	-0.593	1.1	-0.419	0.509	0.467	-1.52	-0.379	1.03	0.0876	-0.906	-2.42	HSP60	OG5_126788	mitochondrion(25%), kinetoplast(25%)	Mitochondrion	539-562	FALSE	TRUE	FALSE	FALSE	FALSE	FALSE	FALSE	FALSE	FALSE	FALSE	cilium	unfolded protein binding	protein folding
Tb927.10.6880	Q38AR9	GAP	glyceraldehyde 3-phosphate dehydrogenase, cytosolic	7.05739e-05	0.148911	0.00208452	0.657523	0.460826	0.000889356	0.0583598	0.766037	0.498927	0.000519917	0.0136009	0.646039	0.451313	-2.46	-0.753	-1.76	-0.226	-0.378	-1.94	-1.01	-0.152	-0.346	-2.05	-1.35	-0.234	-0.386	GAP	OG5_126628	cytoplasm(25%), flagellar cytoplasm(25%)	Cytoplasm	ND	FALSE	FALSE	FALSE	FALSE	FALSE	FALSE	FALSE	FALSE	FALSE	FALSE	cytoplasm	glyceraldehyde-3-phosphate dehydrogenase (NAD+) (phosphorylating) activity	glycolytic process
Tb927.10.7060	Q38AQ7	NUP96	Nucleoporin NUP96	1.91433e-05	0.0050085	0.0116605	0.00571803	0.169158	0.463309	0.715929	0.11454	0.00145213	0.00138786	0.00349134	0.452233	0.389108	3.49	2	1.77	-1.97	-0.913	-0.479	-0.237	1.06	2.34	2.35	2.1	-0.491	0.564	NUP96	OG5_146554	cytoplasm(reticulated, points), flagellar cytoplasm(weak)	Cytoplasm	208-217;395-408	FALSE	FALSE	FALSE	FALSE	FALSE	FALSE	FALSE	FALSE	FALSE	FALSE	cytoplasm	structural constituent of nuclear pore	poly(A)+ mRNA export from nucleus
Tb927.10.7090	Q38AQ4	AOX	Alternative oxidase, mitochondrial	0.443595	0.0744969	0.0317404	0.0854824	0.508536	0.486199	0.677107	0.270918	0.10738	0.00483865	0.0474345	0.461125	0.0736147	0.662	1.59	1.95	1.53	0.57	0.601	0.358	-0.959	1.43	2.66	1.78	-0.637	-1.6	AOX	OG5_130283	cytoplasm(points), flagellar cytoplasm	Mitochondrion	ND	FALSE	FALSE	FALSE	FALSE	FALSE	FALSE	FALSE	FALSE	FALSE	FALSE	cytoplasm	alternative oxidase activity	alternative respiration
Tb927.10.730	Q38CG7	NA	ATP synthase, putative	0.0325318	0.910198	0.0483822	0.72077	0.576112	0.0541316	0.0382939	0.362741	0.0340378	2.37585e-05	0.000198652	0.303677	0.90258	1.36	-0.0679	1.25	-0.216	0.338	1.21	1.31	0.553	1.35	3.19	2.66	-0.627	-0.0737	Tb927.10.730	OG5_127797	acidocalcisome(50%), cytoplasm(reticulated, 50%)	Cytoplasm	ND	FALSE	FALSE	FALSE	FALSE	FALSE	FALSE	FALSE	FALSE	FALSE	FALSE	acidocalcisome	proton-transporting ATPase activity, rotational mechanism	ATP synthesis coupled proton transport
Tb927.10.7340	Q38AM9	NA	40S ribosomal protein S24E, putative	1.78721e-05	0.667855	0.0291205	0.380258	0.97114	6.08354e-06	0.0705856	0.361457	0.403857	0.00304631	0.305106	0.0948594	0.424263	-2.78	-0.221	-1.19	-0.456	0.0186	-3.02	-0.967	0.474	0.433	-1.7	-0.534	-0.888	-0.414	Tb927.10.7340	OG5_126896	cytoplasm(patchy)	Cytoplasm	ND	FALSE	FALSE	FALSE	FALSE	FALSE	FALSE	FALSE	FALSE	FALSE	FALSE	cytoplasm	structural constituent of ribosome	translation
Tb927.10.7410	Q38AM2	NA	succinyl-CoA ligase [GDP-forming] beta-chain, putative	0.500345	0.0209376	0.0213538	0.00254207	0.187372	0.122572	0.992848	9.51431e-05	0.000936259	0.000222671	0.000956961	0.321854	0.00110655	0.445	1.62	1.61	2.22	-0.885	1.04	-0.00589	-3.1	2.49	2.87	2.48	0.659	-2.44	Tb927.10.7410	OG5_126862	ND	Mitochondrion	410-419	FALSE	TRUE	FALSE	FALSE	FALSE	FALSE	FALSE	FALSE	FALSE	FALSE	mitochondrion	N/A	N/A
Tb927.10.7500	Q38AL4	NOP1	fibrillarin	0.830556	0.135726	0.328498	0.267572	0.690507	0.847141	0.587986	0.470568	0.0334081	0.000196347	0.0993726	0.0256046	0.00491764	0.157	1.12	0.723	0.823	0.292	-0.141	-0.398	-0.531	1.64	3.24	1.25	-1.73	-2.27	NOP1	OG5_127191	ND	Nucleus	1-82	FALSE	FALSE	FALSE	FALSE	FALSE	FALSE	FALSE	FALSE	FALSE	FALSE	Cajal body	RNA binding	box C/D RNA 3'-end processing
Tb927.10.7630	Q38AK1	KAP104	transportin2- like protein	0.000704573	0.0300449	0.269457	0.399674	0.549994	0.45231	0.24742	0.803505	0.00335815	6.05212e-05	0.0470804	0.377174	0.522689	2.5	1.47	0.719	-0.545	-0.385	0.486	-0.754	0.16	2.09	3.15	1.34	-0.572	-0.412	KAP104	OG5_151869	nuclear pore(<10%), cytoplasm(points)	Cytoplasm	ND	FALSE	TRUE	FALSE	FALSE	FALSE	FALSE	FALSE	FALSE	FALSE	FALSE	cytoplasm	nuclear import signal receptor activity	protein import into nucleus
Tb927.10.7710	Q38AJ3	NA	40S ribosomal protein S8, putative	0.183309	0.05164	0.953403	0.0758861	0.748952	0.0184044	0.05812	0.0397231	0.930199	1.2482e-06	0.0486543	0.000631179	3.44732e-06	-0.828	-1.24	-0.0356	1.12	-0.195	1.53	1.2	-1.32	0.0533	3.99	1.26	-2.4	-3.72	Tb927.10.7710	OG5_128061	nucleolus	Nucleus	ND	FALSE	FALSE	FALSE	FALSE	FALSE	FALSE	TRUE	FALSE	FALSE	FALSE	nucleolus	structural constituent of ribosome	maturation of 5.8S rRNA
Tb927.10.7880	Q38AH6	NA	Sperm tail/Sperm tail C-terminal domain containing protein, putative	0.071968	0.420155	0.173569	0.283237	0.619967	0.041229	0.564328	0.123313	0.257587	0.0027716	0.0946093	0.966657	0.114248	1.85	0.804	1.38	1.08	-0.492	2.12	0.572	-1.57	1.14	3.3	1.71	-0.0413	-1.61	Tb927.10.7880	OG5_130359	ND	Nucleus	ND	FALSE	FALSE	FALSE	FALSE	FALSE	FALSE	FALSE	FALSE	FALSE	FALSE	axoneme	N/A	axonemal dynein complex assembly
Tb927.10.8040	Q38AG0	BAD1	beta adaptin, putative	0.00137806	0.0452396	0.0954134	0.908493	0.661239	0.111447	0.706522	0.580835	0.00109372	6.36323e-05	0.00272361	0.633649	0.939202	2.2	1.27	1.04	0.0697	-0.266	0.994	-0.229	-0.336	2.26	2.96	2.03	0.29	-0.0462	BAD1	OG5_127081	ND	Cytoplasm	191-202;349-359;605-624;641-661	FALSE	FALSE	FALSE	FALSE	FALSE	FALSE	FALSE	FALSE	FALSE	FALSE	Golgi apparatus	N/A	intracellular protein transport
Tb927.10.8190	Q38AE5	NA	T-complex protein 1, theta subunit, putative	0.346549	0.560125	0.826601	0.770971	0.524274	0.0781938	0.42478	0.727892	0.00721977	0.159003	0.0427952	0.735881	0.494965	-0.458	0.282	-0.106	-0.14	-0.308	-0.88	-0.387	-0.168	1.41	0.694	1.02	-0.163	-0.33	Tb927.10.8190	OG5_127923	cytoplasm(strong, 25%), cytoplasm(reticulated, 75%), flagellar cytoplasm(weak)	Cytoplasm	ND	FALSE	TRUE	FALSE	FALSE	FALSE	FALSE	FALSE	FALSE	FALSE	FALSE	chaperonin-containing T-complex	unfolded protein binding	protein folding
Tb927.10.8200	Q38AE4	NA	Ribosomal protein L1p/L10e family, putative	0.396744	0.170278	0.0252256	0.160742	0.721136	0.415192	0.335179	0.287377	0.0204868	0.00436864	0.00213057	0.14486	0.0163552	-0.58	0.952	1.61	0.975	0.243	-0.558	0.662	-0.732	1.68	2.14	2.34	-1.02	-1.75	Tb927.10.8200	OG5_150572	ND	Nucleus	ND	FALSE	FALSE	FALSE	FALSE	FALSE	FALSE	FALSE	FALSE	FALSE	FALSE	nucleolus	N/A	N/A
Tb927.10.8290	Q38AD5	EIF3C-1	eukaryotic translation initiation factor 3 subunit c	0.00817415	0.249976	0.175814	0.869048	0.898107	0.071336	0.829911	0.970611	0.0793525	0.00104852	0.051775	0.964975	0.935641	1.93	0.785	0.93	0.111	0.0861	1.26	0.144	-0.0248	1.22	2.51	1.37	-0.0295	-0.0543	EIF3C-1	OG5_127970	ND	Nucleus	157-177;689-740	FALSE	TRUE	FALSE	FALSE	FALSE	FALSE	FALSE	FALSE	FALSE	FALSE	cytoplasm	mRNA binding	translational initiation
Tb927.10.8430	Q38AC1	NA	40S ribosomal protein S12, putative	0.0114452	0.365987	0.201419	0.713492	0.361495	0.156489	0.697284	0.581082	0.0615691	0.000389236	0.027381	0.460144	0.20319	1.69	0.566	0.808	-0.228	-0.572	0.9	0.242	-0.344	1.21	2.57	1.45	-0.461	-0.805	Tb927.10.8430	OG5_149534	nucleoplasm	Cytoplasm	ND	FALSE	FALSE	FALSE	FALSE	FALSE	FALSE	FALSE	FALSE	FALSE	FALSE	ciliary plasm	structural constituent of ribosome	translation
Tb927.10.8670	Q38AA5	NA	hypothetical protein, conserved	0.0389566	0.581849	0.891937	0.00641038	0.144422	0.797004	0.493507	0.147249	0.0647461	0.605345	0.22481	0.0123132	0.232744	-2.19	0.557	-0.137	3.01	1.51	0.259	-0.694	-1.5	1.94	-0.522	1.25	2.72	1.22	Tb927.10.8670	OG5_167669	kinetoplast, mitochondrion(weak)	Mitochondrion	ND	FALSE	FALSE	FALSE	FALSE	FALSE	FALSE	FALSE	FALSE	FALSE	FALSE	kinetoplast	N/A	N/A
Tb927.10.8890	Q38A85	NA	kinetoplast DNA-associated protein, putative	0.335638	0.284644	0.689156	0.118451	0.575484	0.144625	0.496468	0.30204	0.296333	0.0863974	0.70878	0.439699	0.789654	0.925	1.03	0.381	1.53	0.534	1.42	-0.65	-0.993	1.01	1.69	0.356	0.74	-0.254	Tb927.10.8890	OG5_149132	ND	Mitochondrion	ND	FALSE	FALSE	FALSE	FALSE	FALSE	TRUE	FALSE	FALSE	FALSE	FALSE	kinetoplast	DNA binding	DNA packaging
Tb927.10.8930	Q38A81	PFC18	paraflagellar rod component, putative	0.521946	0.752146	0.178657	0.0430191	0.41199	0.00504665	0.101591	0.202853	0.511478	0.0823683	0.0267139	0.0621956	0.520467	0.662	-0.325	1.41	2.19	0.851	3.18	1.74	-1.34	0.679	1.85	2.42	2	0.665	PFC18	OG5_149131	ND	Cytoplasm	ND	FALSE	FALSE	FALSE	FALSE	FALSE	FALSE	FALSE	FALSE	FALSE	FALSE	paraflagellar rod	N/A	N/A
Tb927.10.8940	Q38A80	KH1	flagellum targeting protein kharon1, putative	0.000208542	0.000457098	0.000318202	0.045267	0.584091	0.085623	0.882624	0.0137777	0.944617	0.0661974	0.937666	0.950119	0.0119584	-1.87	-1.73	-1.8	0.893	-0.234	0.757	-0.0628	-1.13	0.0295	0.813	-0.0332	-0.0266	-1.15	KH1	OG5_149130	cortical cytoskeleton	Nucleus	19-34;259-268	FALSE	FALSE	FALSE	FALSE	FALSE	FALSE	FALSE	FALSE	FALSE	FALSE	ciliary pocket	mRNA binding	protein targeting
Tb927.10.8960	Q38A78	NA	hypothetical protein, conserved	2.05346e-05	0.342103	0.0894604	0.676141	0.333419	0.000590623	0.428646	0.577277	0.940436	0.00483807	0.472589	0.429412	0.813063	-3.69	-0.663	-1.21	0.289	0.675	-2.74	-0.55	0.386	0.0516	-2.14	-0.499	-0.549	-0.163	Tb927.10.8960	OG5_147105	ND	Mitochondrion	68-81	FALSE	FALSE	FALSE	FALSE	FALSE	FALSE	FALSE	FALSE	FALSE	FALSE	antipodal site	N/A	N/A
Tb927.10.8980	Q38A76	NA	hypothetical protein, conserved	3.35447e-06	0.967203	0.00728295	0.518187	0.172732	1.70056e-05	0.00801199	0.459449	0.372981	9.71738e-07	0.0569774	0.0422527	0.00817349	-2.4	-0.0161	-1.15	0.254	0.546	-2.13	-1.13	0.292	0.352	-2.61	-0.779	0.836	1.13	Tb927.10.8980	OG5_167671	kinetoplast(strong), mitochondrion	Mitochondrion	ND	FALSE	FALSE	FALSE	FALSE	FALSE	FALSE	FALSE	FALSE	FALSE	FALSE	cytoplasm	N/A	N/A
Tb927.10.9330	Q38A41	NA	hypothetical protein, conserved	8.22163e-05	0.000130373	0.00166642	0.0433941	0.309075	0.0291418	0.303529	0.281752	0.000364326	7.37798e-05	0.00454987	0.108031	0.572836	2.57	2.47	1.91	1.14	0.553	1.24	-0.56	-0.586	2.24	2.59	1.68	0.89	0.304	Tb927.10.9330	OG5_161924	ND	Nucleus	ND	FALSE	TRUE	FALSE	FALSE	FALSE	TRUE	FALSE	FALSE	FALSE	FALSE	cytoplasm	mRNA binding	posttranscriptional regulation of gene expression
Tb927.10.9570	Q38A18	PFC14	paraflagellar rod component, putative	0.120538	0.926511	0.544366	0.0223312	0.514353	0.000409905	0.485745	0.0861704	0.982914	0.0361975	0.499022	0.0687649	0.907588	1.49	-0.0858	0.566	2.26	0.609	3.83	0.652	-1.65	-0.0199	2.05	0.632	1.76	0.108	PFC14	OG5_144030	ND	Cytoplasm	ND	FALSE	FALSE	FALSE	FALSE	FALSE	FALSE	FALSE	FALSE	FALSE	FALSE	paraflagellar rod	N/A	N/A
Tb927.10.9780	Q389Z8	NA	ATP-dependent DEAD/H RNA helicase, putative	0.127416	0.0372396	0.417479	0.281412	0.452455	0.0131873	0.177733	0.73744	0.00882788	0.0693173	0.151989	0.0972509	0.0502922	-1.1	1.54	0.575	0.769	0.532	-1.88	-0.969	-0.236	2	1.33	1.03	-1.21	-1.44	Tb927.10.9780	OG5_128047	nucleolus	Nucleus	273-319;785-795	FALSE	FALSE	FALSE	FALSE	FALSE	FALSE	FALSE	FALSE	FALSE	FALSE	nucleolus	ATP binding	nucleobase-containing compound metabolic process
Tb927.10.9880	P50885	TbL18LP	60S ribosomal protein L18, putative	0.562497	0.194411	0.51944	0.479535	0.836717	0.975161	0.0588976	0.614592	0.00296164	0.00899505	0.189874	0.659849	0.949044	0.422	0.961	-0.47	0.516	0.15	-0.0226	-1.43	-0.366	2.4	2.06	0.971	0.32	-0.0464	TbL18LP	OG5_127236	ND	Cytoplasm	ND	FALSE	FALSE	FALSE	FALSE	FALSE	FALSE	FALSE	FALSE	FALSE	FALSE	cytoplasm	RNA binding	translation
Tb927.11.10030	Q383S6	NA	60S ribosomal protein L29, putative	0.00245783	0.0459316	0.138135	0.0140812	0.566233	0.00892799	0.569192	0.0487585	0.00926497	0.090761	0.0329212	0.0935745	0.741398	-2.87	1.77	1.29	2.24	0.488	-2.4	-0.484	-1.75	2.39	-1.48	1.91	1.47	-0.28	Tb927.11.10030	OG5_127199	ND	Nucleus	ND	FALSE	FALSE	FALSE	FALSE	FALSE	FALSE	FALSE	FALSE	FALSE	FALSE	cytoplasm	structural constituent of ribosome	cytoplasmic translation
Tb927.11.10200	Q383Q9	NA	hypothetical protein, conserved	2.07963e-05	0.00962512	0.00213251	0.300124	0.711205	5.07359e-09	2.47661e-06	0.499718	2.06925e-05	0.00273346	0.370416	0.609643	0.867873	-2.92	1.53	-1.88	-0.573	-0.202	-5.02	-3.41	0.37	2.92	-1.82	-0.493	-0.279	0.0908	Tb927.11.10200	OG5_148154	ND	Nucleus	52-217;318-327	FALSE	FALSE	FALSE	FALSE	FALSE	FALSE	FALSE	FALSE	FALSE	FALSE	paraflagellar rod	N/A	N/A
Tb927.11.1050	Q387E5	NA	ribosome production factor 1, putative	0.768322	0.0611897	0.45226	0.142027	0.660352	0.461792	0.23959	0.0618431	0.00235434	0.000258203	0.0360765	0.110153	0.00149196	-0.174	1.15	0.446	0.887	-0.259	-0.436	-0.704	-1.15	2.01	2.54	1.3	-0.97	-2.12	Tb927.11.1050	OG5_128253	nucleolus	Nucleus	62-73	FALSE	FALSE	FALSE	FALSE	FALSE	FALSE	FALSE	FALSE	FALSE	FALSE	nucleolus	rRNA primary transcript binding	RNA processing
Tb927.11.1090	Q387E1	ClpGM6	calpain-like protein, putative	2.16477e-06	0.0251131	0.00259684	0.111444	0.227462	0.0302124	0.329917	0.680574	0.0308552	0.000133101	0.00326514	0.995686	0.684518	3.51	1.32	1.87	-0.911	-0.682	1.27	0.547	0.229	1.27	2.54	1.82	-0.003	0.226	ClpGM6	OG5_130635	ND	Cytoplasm	5767-5837	FALSE	FALSE	FALSE	FALSE	FALSE	FALSE	FALSE	FALSE	FALSE	FALSE	cilium	calcium-dependent cysteine-type endopeptidase activity	proteolysis
Tb927.11.10910	Q383I8	NA	40S ribosomal protein SA, putative	0.0079513	0.779551	0.850593	0.11866	0.212056	0.128086	0.926926	0.00819059	0.0253608	0.04903	0.0207575	0.0710536	8.72669e-05	-1.26	0.122	0.0821	0.7	-0.554	-0.681	-0.04	-1.25	-1.03	-0.898	-1.07	-0.817	-2.07	Tb927.11.10910	OG5_127014	ND	Cytoplasm	ND	FALSE	FALSE	FALSE	FALSE	FALSE	FALSE	FALSE	FALSE	FALSE	FALSE	cytoplasm	mRNA binding	cytoplasmic translation
Tb927.11.11010	Q383H7	NA	hypothetical protein, conserved	0.00666371	0.401037	0.0511392	0.111893	0.597159	0.00100077	0.240051	0.274622	0.803294	0.00463592	0.158589	0.379843	0.824573	1.76	0.503	1.21	0.974	0.315	2.23	0.71	-0.659	0.148	1.86	0.858	0.527	-0.132	Tb927.11.11010	OG5_149106	ND	Nucleus	ND	FALSE	FALSE	FALSE	FALSE	FALSE	FALSE	FALSE	FALSE	TRUE	FALSE	axoneme	phosphate ion binding	N/A
Tb927.11.11140	Q383G4	NA	hypothetical protein	0.000148368	0.0671243	0.0702797	0.12433	0.0999284	0.299505	0.981411	0.905721	0.0242634	0.000654408	0.0255224	0.627758	0.547103	3.34	1.4	1.38	-1.16	-1.25	0.773	-0.0171	-0.0871	1.76	2.89	1.74	-0.358	-0.445	Tb927.11.11140	OG5_157956	ND	Cytoplasm	503-512	FALSE	FALSE	FALSE	FALSE	FALSE	FALSE	FALSE	FALSE	FALSE	FALSE	cortical cytoskeleton	ATP hydrolysis activity	cytoskeleton-dependent intracellular transport
Tb927.11.11210	Q383F7	PFC17	paraflagellar rod component, putative	0.0420878	0.404669	0.0524979	0.385767	0.8458	0.0391354	0.242448	0.291142	0.0860699	0.00989728	0.00667082	0.256109	0.933477	2.09	0.821	1.98	0.855	-0.19	2.12	1.16	-1.04	1.74	2.73	2.9	1.13	0.0815	PFC17	OG5_148836	ND	Nucleus	ND	FALSE	FALSE	FALSE	FALSE	FALSE	FALSE	FALSE	FALSE	FALSE	FALSE	paraflagellar rod	N/A	N/A
Tb927.11.11230	Q583T1	NA	NA	0.150822	0.919282	0.0861518	0.560622	0.462542	0.434785	0.104336	0.876764	0.0887303	0.0619054	0.931535	0.336785	0.418135	-0.996	-0.0686	-1.2	0.395	0.5	-0.532	-1.13	0.105	1.19	1.32	0.0581	-0.657	-0.552	Tb927.11.11230	OG5_127132	ND	Mitochondrion	144-153;158-189	FALSE	FALSE	FALSE	FALSE	FALSE	FALSE	FALSE	FALSE	FALSE	FALSE	cytoplasm	RNA binding	ribosomal large subunit biogenesis
Tb927.11.11290	Q383E9	HSP70.1	heat shock protein 70, putative	0.000799893	0.227975	0.0305764	0.135426	0.294069	0.282362	0.295063	0.639141	0.00647716	3.05853e-06	0.0005028	0.045942	0.115035	2.24	0.714	1.33	-0.892	-0.619	0.634	0.617	0.274	1.73	3.59	2.35	-1.22	-0.945	HSP70.1	OG5_151749	ND	Cytoplasm	624-647	FALSE	FALSE	FALSE	FALSE	FALSE	FALSE	FALSE	FALSE	FALSE	FALSE	cytoplasm	ATP binding	cellular response to unfolded protein
Tb927.11.11460	Q383D2	ATOM69	Mitochondrial import receptor subunit ATOM69	2.28889e-05	0.0754144	0.0039982	0.926312	0.192826	0.00257026	0.190173	0.224445	0.00789585	1.98225e-05	0.000314659	0.375474	0.732939	3.05	1.06	1.83	-0.0531	-0.762	1.93	0.767	-0.709	1.66	3.08	2.43	0.513	-0.196	ATOM69	OG5_151741	ND	Peroxisome	505-515	FALSE	TRUE	FALSE	FALSE	FALSE	FALSE	FALSE	FALSE	FALSE	FALSE	mitochondrial outer membrane	N/A	protein import into mitochondrial matrix
Tb927.11.11690	Q383B1	VAB	Vacuolar proton pump subunit B, putative	0.00715973	0.00309793	0.000638604	0.715647	0.478892	0.474356	0.516979	0.728634	0.000355717	2.62817e-06	7.22672e-05	0.0105622	0.00470677	1.66	1.86	2.22	-0.206	-0.402	-0.406	0.367	-0.196	2.36	3.51	2.72	-1.56	-1.76	VAB	OG5_127061	acidocalcisome	Cytoplasm	ND	FALSE	FALSE	FALSE	FALSE	FALSE	FALSE	FALSE	FALSE	FALSE	FALSE	acidocalcisome	P-type proton-exporting transporter activity	endocytosis
Tb927.11.11820	Q382Z8	NA	40S ribosomal protein S17, putative	2.22494e-05	0.00234902	0.00323426	0.604591	0.548042	0.022333	0.893889	0.933213	0.0476549	2.83803e-05	0.0624243	0.480643	0.533446	2.27	1.45	1.39	0.221	0.257	1.04	-0.0568	0.0357	0.884	2.22	0.827	-0.302	-0.266	Tb927.11.11820	OG5_126867	cytoplasm(patchy)	Cytoplasm	ND	FALSE	FALSE	FALSE	FALSE	FALSE	FALSE	FALSE	FALSE	FALSE	FALSE	cytoplasm	structural constituent of ribosome	translation
Tb927.11.11920	Q382Y9	NA	molybdenum cofactor biosynthesis protein, putative	0.000451077	0.0564679	0.406246	0.000741724	0.231612	0.0842371	0.25543	0.0133543	0.0249516	0.590718	0.227857	0.264555	0.000911615	3.05	1.49	0.626	-2.9	-0.91	-1.34	-0.864	1.99	1.78	-0.404	0.918	0.847	2.84	Tb927.11.11920	OG5_150516	ND	Nucleus	10-20;90-109;416-425	FALSE	FALSE	FALSE	FALSE	FALSE	FALSE	TRUE	FALSE	FALSE	FALSE	antipodal site	N/A	N/A
Tb927.11.12150	Q382W6	BILBO1	flagellar pocket cytoskeletal protein bilbo1	0.972677	0.0513238	0.0440825	0.431655	0.0443326	0.208544	0.940945	0.196145	0.0497211	0.383898	0.0426852	0.916268	0.232854	-0.0262	1.56	1.62	0.606	1.61	-0.98	0.0567	1.01	1.57	0.672	1.63	-0.0804	0.928	BILBO1	OG5_146304	ND	Cytoplasm	332-363;401-421	FALSE	FALSE	FALSE	FALSE	FALSE	FALSE	FALSE	FALSE	FALSE	FALSE	ciliary pocket collar	protein binding	cilium organization
Tb927.11.12980	Q382N7	NA	hypothetical protein, conserved	0.49745	0.585203	0.299955	0.365547	0.00200324	0.439124	0.616665	0.000215067	0.293794	0.906808	0.127733	0.688585	8.05508e-05	0.522	0.419	0.803	-0.699	2.66	-0.596	0.384	3.35	0.814	-0.0896	1.2	0.307	3.66	Tb927.11.12980	OG5_154535	kinetoplast(strong), mitochondrion	Nucleus	397-418	FALSE	FALSE	FALSE	FALSE	FALSE	FALSE	FALSE	FALSE	FALSE	FALSE	kinetoplast	N/A	N/A
Tb927.11.13030	Q382N3	NA	calmodulin	0.000935759	0.903726	0.0694786	0.246789	0.531355	7.06191e-05	0.0878542	0.585092	0.302699	0.000545713	0.00955097	0.0707361	0.192071	2.12	0.0679	1.06	0.66	0.353	2.72	0.991	-0.307	0.585	2.25	1.58	1.05	0.747	Tb927.11.13030	OG5_126800	ND	Cytoplasm	ND	FALSE	FALSE	FALSE	FALSE	FALSE	FALSE	FALSE	FALSE	TRUE	FALSE	cilium	calcium ion binding	calcium-mediated signaling
Tb927.11.13090	Q382M7	NA	elongation factor 1 gamma, putative	0.841098	0.0543024	0.0171893	0.135206	0.551249	0.782076	0.590704	0.0423736	0.00854091	0.000813173	0.00238733	0.21586	0.00242363	0.106	1.06	1.35	0.811	-0.316	-0.146	0.285	-1.13	1.51	2.03	1.8	-0.666	-1.79	Tb927.11.13090	OG5_127580	ND	Cytoplasm	213-257	FALSE	TRUE	FALSE	FALSE	FALSE	FALSE	FALSE	FALSE	FALSE	FALSE	ciliary plasm	translation elongation factor activity	translational elongation
Tb927.11.13230	Q382L3	VAP	VAMP-associated protein, putative	0.0294009	0.187641	0.245274	0.0467864	0.115858	0.268004	0.869484	0.642665	0.0130675	0.00253107	0.0188771	0.0785561	0.18294	1.86	1.08	0.952	-1.68	-1.31	-0.906	-0.133	0.375	2.16	2.72	2.02	-1.47	-1.1	VAP	OG5_146310	flagellar pocket, flagellum attachment zone	Cell_membrane	ND	FALSE	FALSE	FALSE	FALSE	FALSE	FALSE	FALSE	FALSE	FALSE	FALSE	ciliary pocket	N/A	endoplasmic reticulum membrane organization
Tb927.11.13360	Q382K0	NA	AAA ATPase, putative	0.72018	0.019834	0.0166592	0.0422097	0.361326	5.04262e-05	0.937325	0.00539819	0.00109947	0.0932835	0.000907614	0.00621531	0.952076	-0.221	1.53	1.58	-1.31	0.567	-3.06	0.0484	1.88	2.29	1.07	2.34	-1.84	0.037	Tb927.11.13360	OG5_140300	nucleoplasm	Cytoplasm	449-464	FALSE	FALSE	FALSE	FALSE	FALSE	FALSE	FALSE	FALSE	FALSE	FALSE	nucleoplasm	ATP hydrolysis activity	protein metabolic process
Tb927.11.13500	Q382I7	NA	par1	0.643854	0.243533	0.537421	0.123539	0.821424	0.00355403	0.573076	0.183493	0.664336	0.292513	0.895999	0.0940342	0.70956	0.608	-1.55	-0.813	2.08	0.296	4.24	0.742	-1.78	-0.57	1.4	0.172	2.27	0.489	Tb927.11.13500	OG5_148326	paraflagellar rod	Cytoplasm	ND	FALSE	FALSE	FALSE	FALSE	FALSE	FALSE	FALSE	FALSE	FALSE	FALSE	motile cilium	N/A	cilium organization
Tb927.11.13920	Q382E5	KIN2B	kinesin-II 85 Kd subunit, putative	0.0143425	0.0945753	0.933268	0.67985	0.500745	0.000630388	0.0805857	0.792383	0.000989654	0.434436	0.0614202	0.336414	0.481268	-1.52	0.996	-0.0483	0.238	0.39	-2.28	-1.04	0.152	2.17	0.454	1.12	-0.56	-0.408	KIN2B	OG5_127071	ND	Cytoplasm	957-981	FALSE	FALSE	FALSE	FALSE	FALSE	FALSE	TRUE	FALSE	FALSE	FALSE	intraciliary transport particle	ATP binding	cilium assembly
Tb927.11.14000	Q382D7	NRBD1	nuclear RNA binding domain 1	0.0412156	0.0412393	0.0334445	0.987833	0.504825	0.987613	0.920598	0.514466	0.0126702	0.000175844	0.0100955	0.0881878	0.273818	0.83	0.829	0.868	0.0059	0.259	0.006	0.0385	0.253	1.04	1.73	1.08	-0.682	-0.429	NRBD1	OG5_146061	endocytic, cytoplasm	Nucleus	1-63;229-261	FALSE	FALSE	FALSE	FALSE	FALSE	FALSE	FALSE	FALSE	FALSE	FALSE	cytoplasm	RNA binding	RNA processing
Tb927.11.14020	Q382D5	NRBD2	nuclear RNA binding domain 2	0.19163	0.281536	0.00110817	0.590401	0.295126	0.438185	0.0145999	0.603861	0.0865863	0.000437915	0.000208119	0.133761	0.313763	0.72	0.59	2.01	0.292	0.573	0.422	1.42	0.281	0.959	2.21	2.38	-0.832	-0.551	NRBD2	OG5_146061	cytoplasm(patchy)	Nucleus	1-85;247-279	FALSE	FALSE	FALSE	FALSE	FALSE	FALSE	FALSE	FALSE	FALSE	FALSE	cytoplasm	RNA binding	RNA processing
Tb927.11.14120	Q382C5	NA	phenylalanyl-tRNA synthetase alpha chain, putative	0.0357671	3.86392e-05	0.00642	0.875202	0.676239	0.00569677	0.044631	0.793977	0.000177782	0.0706135	0.0263925	0.653498	0.479474	0.993	2.28	1.34	-0.0705	-0.188	-1.36	-0.945	-0.117	2	0.843	1.06	-0.202	-0.319	Tb927.11.14120	OG5_127036	cytoplasm	Cytoplasm	ND	FALSE	FALSE	FALSE	FALSE	FALSE	FALSE	FALSE	FALSE	FALSE	FALSE	cytoplasm	phenylalanine-tRNA ligase activity	phenylalanyl-tRNA aminoacylation
Tb927.11.1430	Q387A9	CMF2	Component of motile flagella 2	0.574406	0.424252	0.41198	0.076108	0.485208	0.00374904	0.113173	0.261578	0.430567	0.460249	0.405839	0.104902	0.5949	0.739	-1.06	1.08	2.41	0.92	4.21	2.14	-1.49	-1.04	0.974	1.1	2.19	0.699	CMF2	OG5_128450	axoneme	Cytoplasm	ND	FALSE	FALSE	FALSE	FALSE	FALSE	FALSE	FALSE	FALSE	FALSE	FALSE	axoneme	alpha-tubulin binding	cilium-dependent cell motility
Tb927.11.14330	Q382A4	NA	HECT-domain (ubiquitin-transferase), putative	0.000226089	0.422775	0.0632962	0.185785	0.42624	0.0362992	0.266539	0.584133	0.00828981	7.76848e-06	0.000553894	0.497002	0.893719	2.93	0.541	1.3	-0.905	-0.537	1.48	0.756	0.368	1.93	3.86	2.68	-0.458	-0.0896	Tb927.11.14330	OG5_128439	cytoplasm, flagellar cytoplasm, nuclear lumen	Cytoplasm	343-352;371-424	FALSE	FALSE	FALSE	FALSE	FALSE	FALSE	FALSE	FALSE	FALSE	FALSE	ciliary plasm	N/A	N/A
Tb927.11.14960	Q381T9	PUF7	pumilio/PUF RNA binding protein 7, putative	2.69483e-06	0.00123967	0.0386144	0.38476	0.72793	0.10555	0.145465	0.5983	0.00141429	9.57466e-06	0.043233	0.698836	0.887898	3.48	2.05	1.22	-0.491	-0.195	0.935	-0.836	0.296	2.02	3.18	1.19	-0.217	0.0789	PUF7	OG5_154670	nucleolus	Nucleus	ND	FALSE	FALSE	FALSE	FALSE	FALSE	FALSE	FALSE	FALSE	FALSE	FALSE	ciliary plasm	RNA binding	mRNA metabolic process
Tb927.11.14980	Q381T7	MRPL38	mitochondrial ribosomal protein L38	0.00463819	0.0121351	0.000189695	0.860188	0.999299	0.556289	0.0941536	0.860877	0.000666498	5.3163e-06	9.99501e-06	0.168459	0.123604	1.85	1.6	2.62	0.104	0.00052	0.349	1.02	-0.104	2.32	3.5	3.34	-0.833	-0.937	MRPL38	OG5_154671	mitochondrion, kinetoplast	Mitochondrion	ND	FALSE	FALSE	FALSE	FALSE	FALSE	FALSE	FALSE	FALSE	FALSE	FALSE	kinetoplast	N/A	N/A
Tb927.11.15000	Q381T5	TbSMN	survival of motor neuron (SMN)-like protein	2.51156e-05	0.597067	0.734944	0.0977847	0.0960586	0.00577646	0.388803	0.992457	0.13583	0.0588496	0.0239331	0.00202421	0.00207091	-3.61	-0.363	0.232	1.17	1.18	-2.07	0.596	0.00648	1.05	1.35	1.64	-2.38	-2.37	TbSMN	OG5_154672	ND	Nucleus	ND	FALSE	FALSE	FALSE	FALSE	FALSE	FALSE	FALSE	FALSE	FALSE	FALSE	nucleolus	protein binding	RNA splicing
Tb927.11.15180	Q381R7	NA	hypothetical protein, conserved	0.171046	0.0835427	0.983145	0.0798584	0.898804	0.164311	0.0802079	0.101728	0.238795	0.360763	0.539077	0.100212	0.993605	0.578	0.74	-0.00872	0.75	0.0525	0.587	-0.749	-0.697	0.494	0.381	-0.255	0.701	0.00331	Tb927.11.15180	OG5_157989	ND	Nucleus	29-38	FALSE	FALSE	FALSE	FALSE	FALSE	FALSE	FALSE	FALSE	FALSE	FALSE	nucleolus	N/A	N/A
Tb927.11.15230	Q381R2	NA	cytosolic coat protein, putative	0.489545	0.800766	0.87447	0.158351	0.209268	0.321976	0.681979	0.868912	0.0586788	0.00148581	0.128478	0.014598	0.0210703	0.588	0.214	-0.134	-1.22	-1.08	-0.848	-0.347	0.14	1.67	3.04	1.32	-2.22	-2.08	Tb927.11.15230	OG5_127521	endoplasmic reticulum(75%), nuclear envelope(75%)	Endoplasmic_reticulum	ND	FALSE	FALSE	FALSE	FALSE	FALSE	FALSE	FALSE	FALSE	FALSE	FALSE	COPII-coated ER to Golgi transport vesicle	protein transmembrane transporter activity	Golgi organization
Tb927.11.15240	Q381R1	RAB2B	Ras-related protein RAB2B, putative	0.101372	0.0642175	0.0227751	0.39599	0.876033	0.281202	0.621123	0.486414	0.0035728	0.0656508	0.00108057	0.825002	0.36164	1.42	1.62	2.04	-0.72	-0.131	-0.919	0.417	0.589	2.72	1.61	3.13	0.186	0.775	RAB2B	OG5_128031	ND	Golgi_apparatus	ND	FALSE	TRUE	FALSE	FALSE	FALSE	FALSE	FALSE	FALSE	FALSE	FALSE	Golgi apparatus	GTPase activity	small GTPase mediated signal transduction
Tb927.11.15480	Q381N7	ACDP	heat shock protein Hsp20, putative	0.287903	0.572999	0.360857	0.986805	0.368055	0.598826	0.721465	0.359569	0.167199	0.360752	0.0873807	0.314609	0.926408	1.07	0.564	0.921	0.0165	-0.907	0.527	0.356	-0.923	1.41	0.921	1.77	1.02	0.0922	ACDP	OG5_147283	cytoplasm, flagellar cytoplasm, nuclear lumen	Nucleus	ND	FALSE	FALSE	FALSE	FALSE	FALSE	FALSE	FALSE	FALSE	FALSE	FALSE	ciliary plasm	N/A	response to heat
Tb927.11.15500	Q381N5	NA	LSU ribosomal protein, mitochondrial, putative	0.00186518	0.308521	0.202908	0.93376	0.697235	0.0246467	0.78955	0.637188	0.0030456	6.04013e-07	0.00160059	0.240042	0.473371	2.08	0.613	0.772	-0.0494	0.232	1.42	0.159	0.281	1.96	4.09	2.12	-0.71	-0.429	Tb927.11.15500	OG5_154679	ND	Mitochondrion	ND	FALSE	FALSE	FALSE	FALSE	FALSE	FALSE	FALSE	FALSE	FALSE	FALSE	mitochondrial large ribosomal subunit	N/A	N/A
Tb927.11.15880	Q381J6	NA	60S ribosomal protein L27, putative	0.176305	0.0355285	0.00320814	0.84618	0.274852	0.523756	0.295798	0.201725	0.277888	0.251829	0.0400593	0.114963	0.747763	2.22	3.56	5.27	0.312	-1.78	-1.03	1.7	-2.09	1.77	-1.87	3.47	2.61	0.518	Tb927.11.15880	OG5_127262	nucleolus, cytoplasm	Cytoplasm	ND	FALSE	FALSE	FALSE	FALSE	FALSE	FALSE	FALSE	FALSE	FALSE	FALSE	cytoplasm	structural constituent of ribosome	translation
Tb927.11.16020	Q381I4	DRBD10	RNA-binding protein, putative	1.60984e-07	0.26169	0.496832	0.075171	0.383135	7.54147e-07	0.0789772	0.338346	0.567728	0.000539523	0.219903	0.0371775	0.00419557	-4.2	0.639	-0.383	1.04	0.494	-3.8	-1.02	-0.543	0.322	-2.25	-0.701	-1.23	-1.77	DRBD10	OG5_128178	nucleolus(strong)	Nucleus	17-36	FALSE	FALSE	FALSE	FALSE	FALSE	FALSE	TRUE	FALSE	TRUE	FALSE	nucleolus	RNA binding	RNA processing
Tb927.11.16280	Q57W56	NA	60S ribosomal protein L8, putative	0.318557	0.304418	0.0383466	0.60766	0.739178	0.629085	0.261236	0.400164	0.988752	0.121528	0.267006	0.0488531	0.232225	-0.467	-0.482	-1.01	-0.239	0.154	-0.224	-0.528	0.393	0.00653	0.738	-0.522	-0.956	-0.563	Tb927.11.16280	OG5_126641	ND	Cytoplasm	ND	FALSE	FALSE	FALSE	FALSE	FALSE	FALSE	FALSE	FALSE	FALSE	FALSE	cytosolic large ribosomal subunit	RNA binding	cytoplasmic translation
Tb927.11.16400	Q381E6	KAP3	kinetoplast-associated protein 3, putative	0.510204	0.055218	0.658476	0.826749	0.169767	0.00806519	0.129009	0.115076	0.183924	0.0299946	0.838992	0.445009	0.0243949	-0.312	0.946	0.209	-0.103	0.663	-1.36	-0.737	0.766	0.641	-1.08	-0.096	0.363	1.13	KAP3	OG5_154711	cytoplasm(points)	Mitochondrion	115-124	FALSE	FALSE	FALSE	FALSE	FALSE	TRUE	FALSE	FALSE	FALSE	FALSE	cytoplasm	DNA binding	DNA packaging
Tb927.11.16450	Q381E1	NA	hypothetical protein, conserved	0.00433516	0.000592909	0.000912622	0.629957	0.480697	1.03416e-06	0.860052	0.821132	0.0015947	0.802915	0.00244113	0.0093077	0.0155579	-1.69	2.14	2.04	0.26	0.381	-3.57	-0.0948	0.122	1.92	-0.134	1.82	-1.52	-1.4	Tb927.11.16450	OG5_157999	nucleolus(strong)	Nucleus	113-133	FALSE	FALSE	FALSE	FALSE	FALSE	FALSE	FALSE	FALSE	FALSE	FALSE	nucleolus	N/A	N/A
Tb927.11.1660	Q386Y8	NA	vesicular transport protein (CDC48 homologue), putative	0.0257873	0.210604	0.00564872	0.628153	0.487126	0.546625	0.0888024	0.83127	0.00270722	1.03863e-05	3.69467e-05	0.102312	0.067909	1.34	0.723	1.72	-0.275	-0.396	0.343	0.999	-0.121	1.9	3.2	2.9	-0.956	-1.08	Tb927.11.1660	OG5_128467	nucleolus, nucleus	Nucleus	ND	FALSE	FALSE	FALSE	FALSE	FALSE	FALSE	FALSE	FALSE	FALSE	FALSE	nucleolus	ATP hydrolysis activity	phosphorelay signal transduction system
Tb927.11.16760	Q381B0	TCP-1-alpha	T-complex protein 1, alpha subunit, putative	0.000124507	0.879905	0.0834578	0.996729	0.799935	0.000178448	0.110969	0.796776	0.160384	0.0161846	0.837069	0.656038	0.850383	-2.57	-0.0843	-1	-0.00229	0.142	-2.49	-0.917	0.144	0.802	-1.44	-0.115	-0.249	-0.105	TCP-1-alpha	OG5_127998	cytoplasm	Cytoplasm	ND	FALSE	TRUE	FALSE	FALSE	FALSE	FALSE	FALSE	FALSE	FALSE	FALSE	chaperonin-containing T-complex	unfolded protein binding	protein folding
Tb927.11.1700	Q386Y4	NA	hypothetical protein, conserved	0.0341169	0.0625156	0.27292	0.495759	0.408265	0.33279	0.410679	0.881791	0.00146597	0.000110323	0.0104517	0.937848	0.943594	1.7	1.47	0.843	0.519	0.632	0.743	-0.629	0.113	2.73	3.53	2.1	-0.0591	0.0537	Tb927.11.1700	OG5_133023	kinetoplast	Mitochondrion	189-200;341-570	FALSE	FALSE	FALSE	FALSE	FALSE	FALSE	FALSE	FALSE	FALSE	TRUE	kinetoplast	N/A	N/A
Tb927.11.17000	Q380Y7	AIR9	AIR9-like protein	0.0484684	0.464319	0.911371	0.208394	0.648355	0.138174	0.533797	0.413274	0.00172863	0.0794004	0.00763589	0.848419	0.528396	0.865	-0.308	-0.0466	-0.536	-0.191	0.637	0.262	0.345	-1.48	-0.762	-1.22	-0.08	0.265	AIR9	OG5_137075	ND	Cytoplasm	842-985	FALSE	FALSE	FALSE	FALSE	FALSE	FALSE	FALSE	FALSE	FALSE	FALSE	cortical cytoskeleton	N/A	cytokinesis
Tb927.11.1710	Q386Y3	gBP21	guide RNA-binding protein of 21 kDa	0.280339	0.118622	0.424697	0.797105	0.00345509	0.799194	0.425963	0.00634384	0.000309978	4.42166e-06	0.0021928	0.0533037	0.338933	0.516	0.757	0.379	0.121	1.53	-0.12	-0.378	1.41	2	2.83	1.62	-0.953	0.456	gBP21	OG5_148774	mitochondrion, kinetoplast(strong)	Mitochondrion	ND	FALSE	TRUE	FALSE	FALSE	FALSE	FALSE	FALSE	FALSE	FALSE	FALSE	kinetoplast	RNA binding	mRNA modification
Tb927.11.1980	Q386W1	ZC3H41	zinc finger protein family member, putative	4.77767e-05	0.000886403	0.00593129	0.78789	0.70534	0.153101	0.432074	0.519012	2.94522e-05	1.54368e-07	0.000202152	0.403904	0.146296	2.62	1.99	1.58	0.141	-0.198	0.766	-0.414	-0.339	2.72	3.93	2.31	-0.441	-0.78	ZC3H41	OG5_151717	cytoplasm(points, patchy), nucleoplasm(points)	Cytoplasm	81-122	FALSE	TRUE	FALSE	FALSE	FALSE	FALSE	FALSE	FALSE	FALSE	FALSE	P granule	RNA binding	N/A
Tb927.11.1990	Q386W0	NA	arginyl-tRNA synthetase, putative	8.06588e-05	0.0137226	0.00235826	0.923226	0.481232	0.051414	0.454774	0.542259	0.00391695	1.02847e-06	0.000634306	0.168016	0.0531419	2.63	1.46	1.87	-0.053	-0.389	1.12	0.414	-0.336	1.75	3.65	2.17	-0.775	-1.11	Tb927.11.1990	OG5_126752	cytoplasm(reticulated, points), cytoplasm(50%), flagellar cytoplasm(50%), nuclear lumen(50%)	Cytoplasm	ND	FALSE	FALSE	FALSE	FALSE	FALSE	FALSE	FALSE	FALSE	FALSE	FALSE	ciliary plasm	arginine-tRNA ligase activity	arginyl-tRNA aminoacylation
Tb927.11.2120	Q386U7	NOC1	Nucleolar complex protein 1, putative	0.890163	0.065798	0.0539108	0.200007	0.393156	0.457974	0.920816	0.656758	0.0324169	0.0105692	0.0261917	0.218156	0.0999024	-0.0881	1.22	1.29	0.834	0.549	-0.477	0.0634	-0.284	1.44	1.77	1.51	-0.8	-1.08	NOC1	OG5_128699	nucleolus	Nucleus	643-667;704-727	FALSE	FALSE	FALSE	FALSE	FALSE	FALSE	FALSE	FALSE	FALSE	FALSE	cytoplasm	N/A	N/A
Tb927.11.2260	Q386T3	EIF4E1	Eukaryotic translation initiation factor 4E-1	0.548468	0.662977	0.0659158	0.7877	0.238182	0.917417	0.14933	0.151778	0.0445313	0.000423505	0.00151811	0.0449022	0.526894	0.43	0.311	1.37	-0.192	0.855	-0.074	1.05	1.05	1.5	2.93	2.56	-1.5	-0.453	EIF4E1	OG5_127278	cytoplasm(points), nucleoplasm(point, points)	Cytoplasm	ND	FALSE	TRUE	FALSE	FALSE	FALSE	FALSE	FALSE	FALSE	FALSE	FALSE	P-body	RNA 7-methylguanosine cap binding	posttranscriptional regulation of gene expression
Tb927.11.2300	Q386S9	ERF1	eukaryotic peptide chain release factor subunit 1, putative	0.0419548	0.177881	0.173378	0.467788	0.454846	0.97611	0.987979	0.982696	0.220682	0.00989595	0.215347	0.138948	0.133672	1.64	1.05	1.06	-0.559	-0.576	0.0229	0.0115	-0.0166	0.954	2.14	0.966	-1.16	-1.18	ERF1	OG5_127250	cytoplasm(reticulated, weak), cytoplasm(<10%), flagellar cytoplasm(<10%), nuclear lumen(<10%)	Cytoplasm	ND	FALSE	FALSE	FALSE	FALSE	FALSE	FALSE	FALSE	FALSE	FALSE	FALSE	ciliary plasm	mRNA binding	cytoplasmic translational termination
Tb927.11.2510	Q386Q9	NA	NUC173 domain containing protein, putative	0.0172084	0.00246879	0.0160451	0.00634417	0.823924	0.040606	0.425448	0.0106163	1.6329e-05	1.22775e-05	0.000113877	0.0519732	0.467211	1.51	2	1.53	1.77	0.132	1.27	-0.475	-1.64	3.22	3.29	2.75	1.2	-0.433	Tb927.11.2510	OG5_146557	ND	Nucleus	1013-1032	FALSE	FALSE	FALSE	FALSE	FALSE	FALSE	FALSE	FALSE	FALSE	FALSE	cytoplasm	N/A	N/A
Tb927.11.2610	Q386P9	CAP50	Cytoskeleton-associated protein 50 kDa	0.52768	0.659831	0.561114	0.749558	0.979364	0.609068	0.886826	0.730103	0.0165012	0.0145181	0.0119749	0.649314	0.912142	0.354	0.246	0.326	0.178	-0.0144	0.286	0.0795	-0.193	1.43	1.47	1.51	0.254	0.0616	CAP50	OG5_150756	ND	Cytoplasm	306-461	FALSE	FALSE	FALSE	FALSE	FALSE	FALSE	FALSE	FALSE	FALSE	FALSE	cortical cytoskeleton	N/A	cellular protein localization
Tb927.11.2650	Q386P5	NA	heat shock protein 84, putative	7.71818e-05	0.000252184	0.305201	0.426072	0.73366	2.84687e-08	0.00315762	0.645493	3.80257e-05	0.0437132	0.0803053	0.273998	0.126583	-2.43	2.18	0.524	0.405	0.172	-4.2	-1.66	-0.233	2.57	-1.07	0.916	-0.56	-0.793	Tb927.11.2650	OG5_129844	kinetoplast(strong, 75%), mitochondrion(75%)	Mitochondrion	ND	FALSE	TRUE	FALSE	FALSE	FALSE	FALSE	FALSE	FALSE	FALSE	FALSE	kinetoplast	ATP hydrolysis activity	protein folding
Tb927.11.3120	Q9U6A9	NA	NA	6.64143e-09	0.417578	0.0233884	0.352682	0.448742	2.76573e-10	0.00359154	0.0994538	0.00131285	0.00325989	0.676669	0.000700913	0.0366455	-4.04	0.364	-1.08	-0.419	0.34	-4.82	-1.44	0.759	1.63	-1.46	0.186	-1.74	-0.982	Tb927.11.3120	OG5_127411	nucleolus(75%)	Nucleus	455-474	FALSE	FALSE	FALSE	FALSE	FALSE	FALSE	FALSE	FALSE	TRUE	FALSE	nucleolus	GTP binding	ribosome biogenesis
Tb927.11.3240	Q386I7	TCP-1-zeta	T-complex protein 1, zeta subunit, putative	0.13996	0.0761277	0.37665	0.669107	0.875781	0.000937857	0.0113938	0.785857	0.00457731	0.593416	0.695253	0.240181	0.361288	-0.837	1.02	-0.493	-0.237	-0.0864	-2.09	-1.51	0.15	1.73	0.296	0.217	-0.66	-0.509	TCP-1-zeta	OG5_127428	ND	Cytoplasm	ND	FALSE	TRUE	FALSE	FALSE	FALSE	FALSE	FALSE	FALSE	FALSE	FALSE	chaperonin-containing T-complex	unfolded protein binding	protein folding
Tb927.11.3250	Q386I6	OADbeta	dynein heavy chain, putative	0.00112677	0.0813669	0.0454759	0.786016	0.653793	0.0388782	0.771105	0.47342	0.000496353	2.06709e-06	0.000242993	0.909201	0.407327	2.48	1.21	1.4	0.182	-0.301	1.45	0.195	-0.482	2.71	4.24	2.9	-0.0763	-0.559	OADbeta	OG5_126558	axoneme	Cytoplasm	169-178	FALSE	FALSE	FALSE	FALSE	FALSE	FALSE	FALSE	FALSE	FALSE	FALSE	axoneme	dynein intermediate chain binding	microtubule-based movement
Tb927.11.3360	Q386H5	CMF22	Component of motile flagella 22	0.937068	0.778864	0.166776	0.427182	0.436408	0.660709	0.264126	0.987158	0.385695	0.108383	0.0546305	0.733931	0.721894	-0.0846	0.301	1.51	0.857	0.84	0.471	1.21	-0.0172	0.937	1.77	2.15	-0.365	-0.382	CMF22	OG5_129551	axoneme	Nucleus	497-520	FALSE	FALSE	FALSE	FALSE	FALSE	TRUE	FALSE	FALSE	FALSE	FALSE	axoneme	N/A	cell motility
Tb927.11.3490	Q386G2	NA	hypothetical protein, conserved	0.0587089	0.134501	0.265306	0.487702	0.897384	0.263938	0.684935	0.412006	0.000312412	0.000199854	0.000845728	0.346356	0.900789	1.23	0.955	0.702	0.434	-0.0802	0.705	-0.253	-0.514	2.63	2.74	2.38	0.591	0.0775	Tb927.11.3490	OG5_150650	ND	Cytoplasm	ND	TRUE	TRUE	FALSE	FALSE	FALSE	FALSE	FALSE	FALSE	FALSE	FALSE	cytoplasm	mRNA binding	N/A
Tb927.11.3570	Q386F5	NA	metallo-peptidase, Clan MA(E) Family M1	0.210218	0.065626	0.13673	0.194288	0.701661	0.0720943	0.697638	0.351927	0.00425731	0.0910124	0.0105463	0.645572	0.170493	-0.635	0.954	0.76	0.659	0.191	-0.93	-0.194	-0.468	1.57	0.87	1.38	-0.229	-0.698	Tb927.11.3570	OG5_127177	ND	Cytoplasm	ND	FALSE	FALSE	TRUE	FALSE	FALSE	FALSE	FALSE	FALSE	FALSE	FALSE	ciliary plasm	metalloaminopeptidase activity	peptide catabolic process
Tb927.11.3590	Q386F2	NA	40S ribosomal protein S4, putative	0.0549942	0.807354	0.0122951	0.387258	0.547776	0.378415	0.0212049	0.788409	0.0348239	0.279894	0.818121	0.809261	0.978412	-0.894	-0.109	-1.2	0.389	0.269	-0.396	-1.09	-0.12	0.992	0.488	-0.103	0.108	-0.0121	Tb927.11.3590	OG5_126890	ND	Cytoplasm	ND	FALSE	FALSE	FALSE	FALSE	FALSE	FALSE	FALSE	FALSE	FALSE	FALSE	cytoplasm	RNA binding	translation
Tb927.11.3740	Q386D8	RPT2	proteasome regulatory ATPase subunit 2	0.00733556	0.162778	0.280645	0.586055	0.408921	0.347116	0.738255	0.775088	0.0233587	0.012033	0.0474741	0.516252	0.714522	2.08	1.01	0.777	-0.388	-0.591	0.674	-0.238	-0.203	1.71	1.92	1.47	0.463	0.26	RPT2	OG5_127456	ND	Nucleus	ND	FALSE	FALSE	FALSE	FALSE	FALSE	FALSE	FALSE	FALSE	FALSE	FALSE	cytoplasm	ATP hydrolysis activity	ubiquitin-dependent protein catabolic process
Tb927.11.3830	Q386D1	NA	hypothetical protein, conserved	3.84778e-06	0.489549	0.503447	0.0719831	0.531084	0.00188342	0.982198	0.0192831	0.0199411	0.00596452	0.0189822	0.000518179	1.3301e-06	-3.04	-0.348	-0.337	0.936	-0.315	-1.75	0.0112	-1.25	1.24	1.51	1.26	-2.02	-3.27	Tb927.11.3830	OG5_145899	nucleolus	Nucleus	ND	FALSE	TRUE	FALSE	FALSE	FALSE	FALSE	FALSE	FALSE	FALSE	FALSE	nucleolus	N/A	N/A
Tb927.11.3840	Q386D0	NA	hypothetical protein, conserved	1.67863e-08	0.0571492	0.256654	0.0349854	0.242788	2.69872e-08	0.0044514	0.305821	0.00942141	0.121465	0.748367	0.000641924	5.08386e-05	-3.43	0.794	-0.461	0.889	0.475	-3.34	-1.25	-0.415	1.13	-0.637	-0.128	-1.58	-1.99	Tb927.11.3840	OG5_147015	ND	Nucleus	61-91;196-205;259-279	FALSE	FALSE	FALSE	FALSE	FALSE	FALSE	FALSE	FALSE	FALSE	FALSE	nucleolus	N/A	N/A
Tb927.11.420	Q387K9	NA	Fcf2 pre-rRNA processing, putative	0.0790019	0.686243	0.243637	0.121824	0.602016	0.00602437	0.438564	0.291576	0.0579609	1.81715e-05	0.0107472	0.678905	0.147894	1.19	0.264	0.773	1.04	0.341	1.96	0.509	-0.697	1.29	3.53	1.8	-0.271	-0.968	Tb927.11.420	OG5_149593	nucleolus	Nucleus	141-171	FALSE	FALSE	FALSE	FALSE	FALSE	FALSE	FALSE	FALSE	FALSE	FALSE	nucleolus	phosphate ion binding	N/A
Tb927.11.4200	Q385Z7	NA	mannose-specific lectin, putative	0.807779	0.326341	0.261937	0.310986	0.820598	0.0865653	0.884025	0.218627	0.0154178	0.0415429	0.0110849	0.196647	0.948582	0.187	0.764	0.876	-0.789	0.175	-1.37	0.112	0.964	2	1.65	2.11	-1.01	-0.0496	Tb927.11.4200	OG5_132555	ND	Endoplasmic_reticulum	358-413;470-545	FALSE	FALSE	FALSE	FALSE	FALSE	FALSE	FALSE	FALSE	FALSE	FALSE	COPII-coated ER to Golgi transport vesicle	mannose binding	Golgi organization
Tb927.11.4210	Q385Z6	NA	U-box domain containing protein, putative	1.36599e-05	0.00917299	9.88271e-05	0.66066	0.579873	0.0327754	0.071318	0.908004	0.000473578	2.64179e-07	5.13341e-06	0.352825	0.297966	2.58	1.32	2.19	-0.205	-0.259	1.05	0.874	-0.0539	1.89	3.38	2.77	-0.438	-0.492	Tb927.11.4210	OG5_148379	cytoplasm, flagellar cytoplasm	Nucleus	ND	FALSE	FALSE	FALSE	FALSE	FALSE	FALSE	FALSE	FALSE	FALSE	FALSE	ciliary plasm	N/A	N/A
Tb927.11.4460	Q385X1	ALBA1	ALBA-Domain Protein	0.941958	0.454747	0.219974	0.700718	0.135675	0.233978	0.620774	0.0656056	0.136493	0.843783	0.0528433	0.903502	0.0514162	-0.0536	0.554	0.92	-0.284	1.13	-0.891	0.365	1.41	1.13	0.145	1.49	0.0893	1.5	ALBA1	OG5_152631	ND	Cytoplasm	113-123	FALSE	FALSE	FALSE	FALSE	FALSE	FALSE	TRUE	FALSE	FALSE	FALSE	cytoplasm	RNA binding	N/A
Tb927.11.4480	Q385W9	RSP4/6	Flagellar radial spoke protein 4/6	0.00115797	0.180135	0.12146	0.326436	0.256054	0.190475	0.822659	0.872377	0.0245471	0.000123366	0.0149541	0.379368	0.300842	2.63	0.975	1.13	-0.707	-0.821	0.952	0.16	-0.114	1.7	3.28	1.86	-0.632	-0.746	RSP4/6	OG5_129136	ND	Nucleus	302-327;368-479;575-584	FALSE	FALSE	FALSE	FALSE	FALSE	FALSE	FALSE	FALSE	FALSE	FALSE	axoneme	N/A	axoneme assembly
Tb927.11.4610	Q385V6	PKA-R	protein kinase A regulatory subunit	0.0494895	0.189277	0.071204	0.619358	0.286329	0.232055	0.59336	0.561828	0.0864546	0.000460696	0.0290454	0.284936	0.617111	1.36	0.883	1.24	0.328	0.712	0.801	0.353	0.384	1.17	2.68	1.52	-0.714	-0.33	PKA-R	OG5_126950	paraflagellar rod	Cytoplasm	ND	FALSE	FALSE	TRUE	FALSE	FALSE	FALSE	FALSE	FALSE	FALSE	FALSE	cAMP-dependent protein kinase complex	cAMP-dependent protein kinase regulator activity	cilium movement involved in cell motility
Tb927.11.4650	Q385V2	MRPL52	kinetoplast ribosomal PPR-repeat containing protein 13	0.108722	0.507887	0.960826	0.743263	0.329558	0.19689	0.539404	0.512625	0.0492226	0.00012894	0.158648	0.230978	0.576679	1.08	0.433	0.032	0.213	0.642	0.857	-0.401	0.428	1.34	2.99	0.94	-0.793	-0.365	MRPL52	OG5_140913	ND	Mitochondrion	904-913	FALSE	FALSE	FALSE	FALSE	FALSE	FALSE	FALSE	FALSE	FALSE	FALSE	mitochondrial large ribosomal subunit	N/A	N/A
Tb927.11.4920	Q385S6	NA	hypothetical protein, conserved	0.00676434	0.244453	0.0480046	0.824639	0.836061	0.0557153	0.378271	0.988294	0.331471	0.00484179	0.0718129	0.903294	0.891691	2.45	0.977	1.71	0.183	0.171	1.65	0.735	-0.0121	0.811	2.56	1.55	-0.1	-0.113	Tb927.11.4920	OG5_148660	ND	Cytoplasm	ND	FALSE	FALSE	FALSE	FALSE	FALSE	FALSE	FALSE	FALSE	TRUE	FALSE	axoneme	N/A	N/A
Tb927.11.5650	Q385K3	NA	replication factor C, subunit 1, putative	0.439991	0.0750362	0.0271646	0.422557	0.24204	0.792697	0.622593	0.703753	0.125302	0.203117	0.0482079	0.987323	0.692058	0.614	1.46	1.85	0.638	0.938	-0.208	0.39	0.301	1.24	1.02	1.63	0.0125	0.313	Tb927.11.5650	OG5_127465	nucleoplasm	Nucleus	505-571	FALSE	FALSE	FALSE	FALSE	FALSE	FALSE	FALSE	FALSE	FALSE	FALSE	DNA replication factor C complex	ATP binding	DNA replication
Tb927.11.5810	Q385I7	NA	Surfeit locus protein 6, putative	0.108166	0.212215	0.253008	0.674462	0.970461	0.0189834	0.91256	0.701563	0.00114281	2.38639e-05	0.00149246	0.000440899	0.000171989	-1.07	0.818	0.748	0.271	0.0238	-1.61	-0.0707	-0.247	2.38	3.41	2.31	-2.64	-2.88	Tb927.11.5810	OG5_141136	ND	Nucleus	129-206	FALSE	FALSE	FALSE	FALSE	FALSE	FALSE	FALSE	FALSE	FALSE	FALSE	nucleolus	DNA binding	ribosomal large subunit biogenesis
Tb927.11.6000	Q385G8	MRPL4	mitochondrial ribosomal protein L4	0.0298841	0.403445	0.684087	0.978703	0.752297	0.148196	0.664471	0.732196	0.0151201	0.00164609	0.0388702	0.59196	0.845353	1.49	0.546	0.264	0.0173	-0.205	0.961	-0.282	-0.222	1.69	2.3	1.41	0.349	0.126	MRPL4	OG5_150007	mitochondrion(25%)	Mitochondrion	403-412	FALSE	FALSE	FALSE	FALSE	FALSE	FALSE	FALSE	FALSE	FALSE	FALSE	cytoplasm	N/A	N/A
Tb927.11.6180	Q385E9	NA	60S ribosomal protein L28, putative	0.0654728	0.145707	0.655432	0.301795	0.755895	0.537439	0.0627905	0.183911	0.696926	0.470926	0.131626	0.62082	0.0744169	-3.46	-2.69	0.807	1.89	-0.561	1.12	3.5	-2.45	-0.704	1.31	2.79	-0.895	-3.34	Tb927.11.6180	OG5_127995	cytoplasm(patchy)	Cytoplasm	ND	FALSE	FALSE	FALSE	FALSE	FALSE	FALSE	FALSE	FALSE	FALSE	FALSE	cytoplasm	mRNA binding	translation
Tb927.11.6230	Q385E6	NA	protein transport protein SEC61 subunit alpha, putative	0.134796	0.00395399	0.0801107	0.9215	0.872938	0.0906358	0.17904	0.796154	0.0087647	0.357911	0.150023	0.866011	0.669816	0.841	1.75	0.994	-0.054	0.0876	-0.959	-0.752	0.142	1.56	0.508	0.808	0.0924	0.234	Tb927.11.6230	OG5_127102	ND	Cell_membrane	ND	FALSE	FALSE	FALSE	FALSE	FALSE	FALSE	FALSE	FALSE	FALSE	FALSE	Sec61 translocon complex	protein transmembrane transporter activity	SRP-dependent cotranslational protein targeting to membrane, translocation
Tb927.11.6300	Q385D9	NA	40S ribosomal protein S5, putative	0.0256242	0.179121	0.502166	0.926567	0.305844	0.282707	0.487732	0.349851	0.0405392	0.000896124	0.155226	0.576713	0.701223	1.76	1.02	0.502	0.0686	0.772	0.811	-0.519	0.703	1.6	2.83	1.08	-0.417	0.286	Tb927.11.6300	OG5_127064	nucleolus, cytoplasm	Cytoplasm	ND	FALSE	FALSE	FALSE	FALSE	FALSE	FALSE	FALSE	FALSE	FALSE	FALSE	cytoplasm	mRNA binding	ribosomal small subunit assembly
Tb927.11.6360	Q385D3	NA	60S ribosomal protein L24, putative	6.14771e-05	0.0467019	0.854436	0.905514	0.578592	6.23577e-07	0.0676206	0.661562	7.30635e-05	0.316192	0.00733214	0.00545248	0.0149639	-2.29	0.974	0.0858	0.0555	0.261	-3.21	-0.889	0.205	2.26	0.474	1.37	-1.43	-1.22	Tb927.11.6360	OG5_127497	ND	Nucleus	149-179	FALSE	FALSE	FALSE	FALSE	FALSE	FALSE	FALSE	FALSE	FALSE	FALSE	cytosolic large ribosomal subunit	RNA binding	assembly of large subunit precursor of preribosome
Tb927.11.6440	Q385C5	ENF	Essential Nuclear Factor, 49 kDa	0.00519855	0.740658	0.10387	0.811164	0.75739	0.00645524	0.18702	0.58478	0.017524	0.0287232	0.000725447	0.00378898	0.0135422	2.15	0.232	1.17	0.167	-0.216	2.08	0.942	-0.383	1.78	1.62	2.72	2.24	1.86	ENF	OG5_146980	cytoplasm(patchy, strong)	Nucleus	66-153;247-328	FALSE	FALSE	FALSE	FALSE	FALSE	FALSE	FALSE	FALSE	FALSE	FALSE	cytoplasm	DNA binding	posttranscriptional regulation of gene expression
Tb927.11.6460	Q385C3	NA	hypothetical protein, conserved	0.0016669	0.11732	0.0154703	0.694181	0.140456	0.0279454	0.329647	0.0669919	0.0276302	0.00285525	0.00288315	0.189432	0.572021	2.95	1.34	2.16	0.327	-1.26	1.94	0.819	-1.58	1.94	2.76	2.76	1.11	-0.471	Tb927.11.6460	OG5_132691	axoneme(50%)	Cytoplasm	835-844	FALSE	FALSE	FALSE	FALSE	FALSE	FALSE	FALSE	FALSE	FALSE	FALSE	axoneme	N/A	N/A
Tb927.11.6510	Q385B8	NA	40S ribosomal protein S21, putative	0.0233932	0.415746	0.625938	0.530567	0.750439	0.0153616	0.199243	0.755602	0.000221449	0.0544546	0.00529382	0.811964	0.583879	-1.35	0.459	-0.274	0.353	0.178	-1.46	-0.733	-0.174	2.45	1.12	1.72	-0.133	-0.308	Tb927.11.6510	OG5_127484	ND	Nucleus	86-194	FALSE	FALSE	FALSE	FALSE	FALSE	FALSE	FALSE	FALSE	FALSE	FALSE	cytoplasm	structural constituent of ribosome	endonucleolytic cleavage in ITS1 to separate SSU-rRNA from 5.8S rRNA and LSU-rRNA from tricistronic rRNA transcript (SSU-rRNA, 5.8S rRNA, LSU-rRNA)
Tb927.11.6530	Q385B6	NA	hypothetical protein, conserved	0.13745	0.111365	0.0549936	0.0471575	0.326712	0.059679	0.715983	0.282869	0.0376724	0.0189545	0.0171123	0.110249	0.57849	1.65	1.78	2.17	2.26	1.08	2.13	0.395	-1.18	2.37	2.72	2.77	1.79	0.605	Tb927.11.6530	OG5_145887	axoneme(75%), cytoplasm	Nucleus	264-273	FALSE	FALSE	FALSE	FALSE	FALSE	FALSE	FALSE	FALSE	FALSE	FALSE	axoneme	N/A	N/A
Tb927.11.6630	Q385A6	NA	3-methylcrotonoyl-CoA carboxylase beta subunit, putative	0.00135269	0.0350666	0.00937987	3.69729e-05	0.00621091	0.00116121	0.552914	0.0442563	0.00503628	0.00366066	0.00120485	0.00083608	0.0960828	2.46	1.5	1.91	-3.46	-2.03	-2.5	0.403	1.43	2.09	2.18	2.49	-2.59	-1.16	Tb927.11.6630	OG5_129211	ND	Mitochondrion	ND	FALSE	FALSE	FALSE	FALSE	FALSE	FALSE	FALSE	FALSE	FALSE	FALSE	methylcrotonoyl-CoA carboxylase complex	methylcrotonoyl-CoA carboxylase activity	leucine catabolic process
Tb927.11.6660	Q385A3	NA	kDNA-linked TEX-like protein	0.00959104	0.00259024	0.311056	0.373113	0.665494	2.47175e-05	0.0273257	0.642243	0.00516838	0.899961	0.465153	0.0281386	0.00997692	-2.41	2.89	0.88	0.771	0.372	-4.52	-2.01	-0.4	2.64	0.108	0.631	-2	-2.39	Tb927.11.6660	OG5_129654	kinetoplast, nucleolus(weak)	Mitochondrion	ND	FALSE	TRUE	FALSE	FALSE	FALSE	FALSE	FALSE	FALSE	FALSE	FALSE	kinetoplast	mRNA binding	translation
Tb927.11.6710	Q384Z8	NA	predicted tetratricopeptide repeat (TPR) protein	0.142142	0.0162574	0.00456902	0.110879	0.372297	8.46266e-06	0.583135	0.017472	3.52378e-05	0.880429	9.45e-06	0.457402	0.0831493	-0.544	0.93	1.13	-0.593	0.325	-2.07	0.199	0.918	1.85	0.0543	2.05	-0.27	0.648	Tb927.11.6710	OG5_144458	ND	Nucleus	ND	FALSE	FALSE	FALSE	FALSE	FALSE	FALSE	FALSE	FALSE	FALSE	FALSE	N/A	N/A	N/A
Tb927.11.6740	Q384Z6	PUF10	pumilio/PUF RNA binding protein 10, putative	0.000476359	0.0248468	0.0897812	0.53693	0.740429	0.296577	0.531977	0.773157	0.00508366	9.94737e-06	0.0213166	0.139186	0.226991	2.52	1.48	1.09	-0.386	-0.206	0.657	-0.39	0.179	1.92	3.52	1.53	-0.943	-0.764	PUF10	OG5_145883	nucleolus	Nucleus	266-277;416-426	FALSE	FALSE	FALSE	FALSE	FALSE	FALSE	FALSE	FALSE	FALSE	FALSE	cytoplasm	RNA binding	mRNA metabolic process
Tb927.11.6790	Q384Z1	NOP89	Nucleolar protein 89	0.00562761	0.0153383	0.0571761	0.389039	0.318534	0.665967	0.539566	0.888421	0.00615675	0.000356248	0.0248304	0.117377	0.0903261	2.26	1.94	1.48	-0.646	-0.751	-0.322	-0.458	-0.104	2.23	3.11	1.77	-1.2	-1.3	NOP89	OG5_128313	nucleolus	Nucleus	ND	FALSE	FALSE	FALSE	FALSE	FALSE	FALSE	FALSE	FALSE	FALSE	FALSE	PeBoW complex	ribonucleoprotein complex binding	maturation of LSU-rRNA from tricistronic rRNA transcript (SSU-rRNA, 5.8S rRNA, LSU-rRNA)
Tb927.11.6870	Q384Y3	14-3-3-II	14-3-3 protein 2	0.0361606	0.0031701	0.470993	0.751323	0.635281	6.99512e-06	0.000545381	0.874261	0.00180353	0.235026	0.624596	0.285131	0.222464	-1.1	1.64	-0.363	-0.159	-0.238	-2.9	-2	-0.0791	1.76	-0.604	-0.245	-0.541	-0.621	14-3-3-II	OG5_126706	flagellar pocket(ring), cytoplasm	Cytoplasm	ND	FALSE	FALSE	FALSE	FALSE	FALSE	FALSE	FALSE	FALSE	FALSE	FALSE	ciliary plasm	protein binding	DNA damage checkpoint signaling
Tb927.11.7380	Q384S7	G3PDH	glycerol-3-phosphate dehydrogenase (FAD-dependent), mitochondrial	0.000491143	0.0049955	0.124062	0.149334	0.281092	0.605392	0.141795	0.700636	0.00560106	0.0925417	0.135413	0.437262	0.250394	2.75	2.1	1.07	-1	-0.742	-0.352	-1.02	0.261	2.06	1.18	1.04	0.531	0.793	G3PDH	OG5_127215	ND	Mitochondrion	72-81	FALSE	FALSE	FALSE	FALSE	FALSE	FALSE	FALSE	FALSE	FALSE	FALSE	cytoplasm	flavin adenine dinucleotide binding	glycerol catabolic process
Tb927.11.7410	Q384S4	NA	MSP-A, putative	0.64522	0.0667646	0.0442272	0.682154	0.839717	0.0102461	0.838831	0.541859	0.254138	0.803317	0.182487	0.179018	0.450197	-0.32	1.32	1.46	-0.284	0.14	-1.92	0.141	0.424	0.802	-0.173	0.943	-0.95	-0.526	Tb927.11.7410	OG5_126749	endoplasmic reticulum	Extracellular	ND	FALSE	FALSE	FALSE	FALSE	FALSE	FALSE	FALSE	FALSE	FALSE	FALSE	endoplasmic reticulum	metalloendopeptidase activity	cell adhesion
Tb927.11.7460	Q384Q5	BiP	luminal binding protein 1 (BiP), putative	0.000909728	0.000344121	0.000571772	0.282415	0.97756	0.147047	0.836014	0.27051	0.114219	0.539258	0.165172	0.634764	0.523175	-1.75	-1.93	-1.84	0.502	-0.0129	0.684	0.0953	-0.515	-0.749	-0.284	-0.654	0.219	-0.295	BiP	OG5_126588	ND	Endoplasmic_reticulum	ND	FALSE	FALSE	FALSE	FALSE	FALSE	FALSE	FALSE	FALSE	FALSE	FALSE	cytoplasm	ATP binding	SRP-dependent cotranslational protein targeting to membrane
Tb927.11.7590	Q384P7	TAP110	Tripartite attachment complex associated protein 110	0.00448604	0.792236	0.605364	0.882796	0.651131	0.0116595	0.437507	0.549696	0.662006	0.836596	0.230344	0.0473091	0.0128762	-2.41	-0.203	0.399	0.114	-0.349	-2.1	0.602	-0.463	0.337	-0.159	0.94	-1.6	-2.06	TAP110	OG5_157135	basal body	Nucleus	ND	FALSE	TRUE	FALSE	FALSE	FALSE	FALSE	TRUE	FALSE	FALSE	FALSE	cytoplasm	N/A	posttranscriptional regulation of gene expression
Tb927.11.760	Q387H4	NA	protein phosphatase 2C, putative	0.0112324	0.0042737	0.0170487	0.217798	0.731839	0.404988	0.549985	0.120475	4.05608e-05	2.33268e-05	0.000175156	0.543614	0.328645	1.2	1.38	1.12	0.549	-0.15	0.367	-0.263	-0.699	2.22	2.32	1.96	0.267	-0.432	Tb927.11.760	OG5_150267	ND	Cytoplasm	ND	FALSE	FALSE	TRUE	FALSE	FALSE	FALSE	FALSE	FALSE	FALSE	FALSE	ciliary plasm	protein serine/threonine phosphatase activity	modulation of formation of structure involved in a symbiotic process
Tb927.11.7780	Q384P0	ATOM46	Mitochondrial import receptor subunit ATOM46	0.00110345	0.128711	0.0975475	0.787929	0.772894	0.0696333	0.880443	0.984327	0.01151	1.25847e-05	0.00814841	0.351465	0.34171	2.11	0.885	0.97	-0.153	-0.164	1.07	0.0852	-0.0111	1.55	3.15	1.63	-0.533	-0.545	ATOM46	OG5_151732	mitochondrion	Mitochondrion	387-400	FALSE	FALSE	FALSE	FALSE	FALSE	FALSE	FALSE	FALSE	FALSE	FALSE	mitochondrial outer membrane	N/A	protein import into mitochondrial matrix
Tb927.11.7850	Q384N3	NA	hypothetical protein, conserved	0.00507818	0.0938823	0.000133674	0.500352	0.465913	0.0525662	0.00877977	0.955202	0.000573172	5.59855e-07	6.68787e-07	0.372536	0.402583	1.51	0.848	2.24	0.332	0.359	0.992	1.39	0.0275	1.95	3.38	3.34	-0.44	-0.413	Tb927.11.7850	OG5_148816	nucleolus	Nucleus	89-104	FALSE	FALSE	FALSE	FALSE	FALSE	FALSE	FALSE	FALSE	FALSE	FALSE	cytoplasm	N/A	N/A
Tb927.11.8030	Q384L6	NA	hypothetical protein, conserved	0.130714	0.306329	0.0843097	0.0992343	0.598456	0.0352767	0.454495	0.247684	0.255288	0.0777158	0.0667912	0.132729	0.711885	1.59	1.06	1.83	1.74	0.539	2.27	0.769	-1.2	1.18	1.87	1.95	1.58	0.378	Tb927.11.8030	OG5_148815	axoneme	Cytoplasm	ND	FALSE	FALSE	FALSE	FALSE	FALSE	FALSE	FALSE	FALSE	FALSE	FALSE	axoneme	N/A	N/A
Tb927.11.8050	Q384L4	NA	Sas10/Utp3/C1D family/Sas10 C-terminal domain containing protein, putative	0.00473451	0.0304468	0.0372585	0.785454	0.496643	0.280136	0.924117	0.3442	0.00110992	0.000195389	0.00139929	0.700229	0.569965	1.79	1.32	1.26	0.157	-0.394	0.631	-0.0549	-0.551	2.14	2.55	2.09	0.222	-0.329	Tb927.11.8050	OG5_128418	ND	Nucleus	18-38;296-305	FALSE	FALSE	FALSE	FALSE	FALSE	FALSE	FALSE	FALSE	FALSE	FALSE	cytoplasm	N/A	N/A
Tb927.11.8200	Q384J9	NA	ribosomal protein S26, putative	0.509344	0.116282	0.438586	0.0490881	0.951571	0.826343	0.406291	0.0555405	0.0736367	0.801165	0.31298	0.174804	0.541374	-0.597	1.46	0.702	1.85	0.0547	-0.198	-0.753	-1.8	1.67	0.227	0.919	1.25	-0.552	Tb927.11.8200	OG5_127138	ND	Cytoplasm	ND	FALSE	FALSE	FALSE	FALSE	FALSE	FALSE	FALSE	FALSE	FALSE	FALSE	cytosolic small ribosomal subunit	mRNA binding	translation
Tb927.11.8950	Q384D3	LRRP1	leucine rich repeat	0.0515984	0.0792312	0.20576	0.348721	0.460726	0.252304	0.596458	0.838086	0.00238739	0.000631718	0.00837702	0.539916	0.681509	1.56	1.39	0.986	0.724	0.567	0.889	-0.406	-0.156	2.6	3.02	2.19	0.471	0.314	LRRP1	OG5_136142	ND	Cytoplasm	367-390	TRUE	FALSE	FALSE	FALSE	FALSE	FALSE	FALSE	FALSE	FALSE	FALSE	bilobe structure	protein binding	N/A
Tb927.11.9440	Q383Y5	CMF63	Component of motile flagella 63	0.0612256	0.113028	0.0140701	0.139582	0.479111	0.0770494	0.319243	0.424759	0.0216337	0.00541846	0.00208686	0.227549	0.672603	1.8	1.51	2.44	1.4	0.657	1.69	0.93	-0.742	2.26	2.82	3.19	1.13	0.391	CMF63	OG5_135882	ND	Cytoplasm	ND	FALSE	FALSE	FALSE	FALSE	FALSE	FALSE	FALSE	FALSE	FALSE	FALSE	ciliary plasm	N/A	cilium-dependent cell motility
Tb927.11.9530	Q383X6	14-3-3-I	14-3-3 protein 1	0.0101646	0.0120846	0.0203696	0.729509	0.333858	0.673583	0.815612	0.530066	0.000253408	1.07791e-05	0.000449148	0.381981	0.801689	1.88	1.83	1.67	0.234	0.661	0.286	-0.158	0.427	2.92	3.81	2.76	-0.597	-0.17	14-3-3-I	OG5_126706	cytoplasm, flagellar cytoplasm	Lysosome/Vacuole	ND	FALSE	FALSE	FALSE	FALSE	FALSE	FALSE	FALSE	FALSE	FALSE	FALSE	axoneme	DNA binding	Ras protein signal transduction
Tb927.11.9590	Q383X0	NA	S-adenosylhomocysteine hydrolase, putative	0.354694	0.230118	0.0206925	0.701817	0.599327	0.922122	0.220706	0.367109	0.0677046	0.00624805	0.00434852	0.325345	0.0671353	0.683	0.892	1.8	0.28	-0.385	0.0714	0.911	-0.665	1.39	2.19	2.3	-0.727	-1.39	Tb927.11.9590	OG5_127233	cytoplasm, flagellar cytoplasm	Cytoplasm	ND	FALSE	TRUE	FALSE	FALSE	FALSE	FALSE	FALSE	FALSE	FALSE	FALSE	ciliary plasm	adenosylhomocysteinase activity	S-adenosylmethionine cycle
Tb927.11.9720	Q383V7	NA	40S ribosomal protein S27, putative	0.000272366	0.0380962	0.00103117	0.978277	0.80767	0.0473669	0.12858	0.828789	0.494331	0.0184005	0.0331569	0.806425	0.976992	-2.53	-1.29	-2.21	0.016	0.143	-1.22	-0.92	0.127	-0.405	-1.48	-1.32	-0.144	-0.017	Tb927.11.9720	OG5_127008	cytoplasm(patchy)	Extracellular	ND	FALSE	FALSE	FALSE	FALSE	FALSE	FALSE	TRUE	FALSE	FALSE	FALSE	cytoplasm	RNA binding	ribosomal small subunit assembly
Tb927.11.980	Q387F2	NUP158	Nucleoporin NUP158	0.00183675	0.136429	0.0681494	0.248561	0.47532	0.423452	0.71265	0.0691687	0.0115564	0.00472689	0.00491076	0.674055	0.0290116	2.32	1.01	1.25	-0.775	0.475	0.533	0.244	1.25	1.8	2.06	2.05	0.278	1.53	NUP158	OG5_127364	nuclear pore	Cytoplasm	1-599	FALSE	FALSE	FALSE	FALSE	FALSE	FALSE	FALSE	FALSE	FALSE	FALSE	nuclear pore	structural constituent of nuclear pore	RNA export from nucleus
Tb927.11.9860	Q383U3	NA	EF-hand domain pair, putative	0.709901	0.14518	0.719041	0.0259956	0.215631	0.000315413	0.263977	0.277244	0.416958	0.115486	0.752581	0.0840546	0.493623	0.416	-1.67	-0.402	2.64	1.41	4.72	1.26	-1.23	-0.913	1.81	0.352	2	0.768	Tb927.11.9860	OG5_151880	ND	Nucleus	ND	FALSE	FALSE	FALSE	FALSE	FALSE	FALSE	FALSE	FALSE	TRUE	FALSE	ciliary plasm	calcium ion binding	N/A
Tb927.11.9920	P21899	NA	NA	0.00252036	0.183264	0.0324487	0.0254322	0.656537	0.000212531	0.37242	0.0643138	0.00459476	0.910518	0.0349665	0.177425	0.584348	2.28	0.919	1.53	1.6	0.301	2.97	0.609	-1.3	-2.11	-0.076	-1.5	0.932	-0.371	Tb927.11.9920	OG5_126703	cytoplasm(points)	Cytoplasm	ND	FALSE	FALSE	FALSE	FALSE	FALSE	FALSE	FALSE	FALSE	FALSE	FALSE	ciliary plasm	protein tag	cellular protein modification process
Tb927.11.9980	Q383T1	NA	2-oxoglutarate dehydrogenase E1 component, putative	0.65002	0.189292	0.168884	0.395507	0.800862	0.977674	0.946367	0.274054	0.00130499	1.06833e-06	0.00110794	0.00611962	0.000420501	0.268	0.79	0.829	0.505	-0.149	-0.0165	0.0396	-0.654	2.15	3.9	2.19	-1.77	-2.42	Tb927.11.9980	OG5_126779	kinetoplast(strong, 50%), mitochondrion(points)	Mitochondrion	ND	FALSE	FALSE	FALSE	FALSE	FALSE	FALSE	FALSE	FALSE	FALSE	FALSE	ciliary basal body	oxoglutarate dehydrogenase (succinyl-transferring) activity	lysine catabolic process
Tb927.2.100	Q584N8	RHS1	retrotransposon hot spot protein 1 (RHS1), putative	0.00085558	0.0464895	0.00860486	0.947113	0.0189831	0.0823703	0.445314	0.016381	0.00563953	0.000629491	0.000889374	0.377421	0.103187	2.98	1.63	2.23	0.0517	-1.95	1.4	0.599	-2	2.37	3.08	2.97	0.694	-1.31	RHS1	OG5_126555	ND	Cytoplasm	35-46;814-828	FALSE	FALSE	FALSE	FALSE	FALSE	FALSE	FALSE	FALSE	FALSE	FALSE	nucleus	N/A	N/A
Tb927.2.1080	Q585G9	RHS5	retrotransposon hot spot protein 5 (RHS5), putative	0.0011951	0.000442425	0.00095215	0.213652	0.252078	0.104902	0.754391	0.0224654	0.00287693	0.00099697	0.0060436	0.0442883	0.750208	1.68	1.86	1.72	-0.577	0.53	-0.762	-0.143	1.11	1.51	1.71	1.37	-0.961	0.145	RHS5	OG5_143989	ND	Cytoplasm	ND	FALSE	FALSE	FALSE	FALSE	FALSE	FALSE	FALSE	FALSE	FALSE	FALSE	nucleus	N/A	N/A
Tb927.2.1210	Q585H2	RHS4	retrotransposon hot spot protein 4 (RHS4), putative	0.00783002	0.570709	0.25239	0.830754	0.295321	0.00120961	0.0939844	0.211073	0.00145714	0.0195149	0.0717559	0.0164623	0.203417	-1.57	0.308	-0.629	-0.116	0.573	-1.99	-0.936	0.689	1.95	1.35	1.01	-1.39	-0.701	RHS4	OG5_126555	ND	Endoplasmic_reticulum	11-22	FALSE	FALSE	FALSE	FALSE	FALSE	FALSE	FALSE	FALSE	FALSE	FALSE	nucleoplasm	N/A	mRNA export from nucleus
Tb927.2.2160	Q586J7	PFC11	paraflagellar rod component, putative	0.0453478	0.443913	0.125761	0.221037	0.85331	0.0163201	0.425243	0.295079	0.0695324	0.00268764	0.0125527	0.272766	0.958748	1.34	0.492	1.01	0.796	0.118	1.64	0.513	-0.678	1.21	2.14	1.72	0.711	0.033	PFC11	OG5_151428	ND	Cytoplasm	ND	FALSE	FALSE	FALSE	FALSE	FALSE	FALSE	FALSE	FALSE	FALSE	FALSE	SNARE complex	soluble NSF attachment protein activity	SNARE complex disassembly
Tb927.2.2230	Q586K3	NA	hypothetical protein, conserved	0.000364647	0.0257876	0.189773	0.237247	0.692118	2.14001e-05	0.00113868	0.424376	0.00223211	0.210684	0.781351	0.528692	0.160146	-2.32	1.32	-0.744	0.668	0.221	-2.97	-2.06	-0.448	1.91	-0.709	-0.154	-0.352	-0.8	Tb927.2.2230	OG5_148233	endoplasmic reticulum	Nucleus	44-90	FALSE	FALSE	FALSE	FALSE	FALSE	FALSE	FALSE	FALSE	FALSE	FALSE	cytoplasm	N/A	N/A
Tb927.2.2510	Q586M2	VDAC1	Mitochondrial outer membrane protein porin 1	0.372935	0.0861719	0.00690977	0.206872	0.388159	0.0396683	0.248055	0.678258	0.0573707	0.00190353	0.00424744	0.00123078	0.00335383	0.539	1.07	1.77	-0.771	-0.522	-1.3	0.704	0.249	1.19	2.09	1.89	-2.2	-1.95	VDAC1	OG5_137180	mitochondrion	Cytoplasm	ND	FALSE	FALSE	FALSE	FALSE	FALSE	FALSE	FALSE	FALSE	FALSE	FALSE	antipodal site	porin activity	ion transport
Tb927.2.2970	Q587G5	MCP13	mitochondrial carrier protein	0.0182697	0.507984	0.428987	0.881098	0.179237	0.0546969	0.895498	0.138193	0.0582695	0.00211697	0.0445812	0.593525	0.329454	1.78	0.469	0.561	0.105	-0.967	1.41	0.0925	-1.07	1.39	2.43	1.48	0.377	-0.695	MCP13	OG5_132495	mitochondrion, kinetoplast(50%)	Mitochondrion	ND	FALSE	FALSE	FALSE	FALSE	FALSE	FALSE	FALSE	FALSE	FALSE	FALSE	antipodal site	guanine nucleotide transmembrane transporter activity	transport
Tb927.2.340	D7SGA2	RHS4	retrotransposon hot spot protein 4 (RHS4), putative	0.0330654	0.267912	0.149675	0.39941	0.57975	0.0182227	0.724827	0.768974	0.0526066	0.000593689	0.0250609	0.0001752	8.53776e-05	-1.83	0.915	1.2	0.692	0.452	-2.06	0.287	-0.239	1.65	3.23	1.94	-3.64	-3.88	RHS4	OG5_126555	cytoplasm(75%)	Cytoplasm	ND	FALSE	FALSE	FALSE	FALSE	FALSE	FALSE	FALSE	FALSE	FALSE	FALSE	cytoplasm	N/A	mRNA export from nucleus
Tb927.2.370	D7SGA3	RHS1	retrotransposon hot spot protein 1 (RHS1), putative	0.0133694	0.0433356	0.856071	0.69063	0.506701	3.07983e-05	0.0295623	0.292655	0.000600323	0.503736	0.106737	0.0693658	0.414355	-1.8	1.43	-0.122	-0.269	0.45	-3.49	-1.55	0.719	2.67	0.453	1.12	-1.27	-0.555	RHS1	OG5_126555	ND	Cytoplasm	28-56;822-833	FALSE	TRUE	FALSE	FALSE	FALSE	FALSE	FALSE	FALSE	FALSE	FALSE	nucleoplasm	N/A	N/A
Tb927.2.380	Q584N0	RHS2	retrotransposon hot spot protein 2 (RHS2), putative	0.000138125	0.211686	0.144543	0.354048	0.196453	7.61564e-07	0.0105188	0.03284	0.135558	0.00758193	0.224481	0.0278209	0.938187	-2.53	0.705	-0.83	-0.519	0.731	-3.76	-1.54	1.25	0.85	-1.61	-0.685	-1.29	-0.043	RHS2	OG5_126555	ND	Mitochondrion	ND	FALSE	FALSE	FALSE	FALSE	FALSE	FALSE	FALSE	FALSE	FALSE	FALSE	cytoplasm	N/A	mRNA export from nucleus
Tb927.2.400	Q584M9	RHS2	retrotransposon hot spot protein 2 (RHS2), putative	0.42287	0.342191	0.300106	0.817408	0.566571	0.70184	0.928755	0.423546	0.148481	0.333736	0.126601	0.904238	0.358872	0.867	1.03	1.13	-0.248	0.618	-0.412	0.096	0.866	1.59	1.05	1.69	0.129	0.995	RHS2	OG5_126555	cytoplasm(patchy, 50%)	Mitochondrion	ND	FALSE	FALSE	FALSE	FALSE	FALSE	TRUE	FALSE	FALSE	FALSE	FALSE	cytoplasm	N/A	mRNA export from nucleus
Tb927.2.4210	Q586V2	PEPCK	Phosphoenolpyruvate carboxykinase [ATP], glycosomal	0.00389069	0.488721	0.0625112	0.611036	0.64483	0.00603579	0.221233	0.961688	0.020675	0.000105451	0.0011164	0.427323	0.45522	2.05	0.446	1.24	0.327	0.296	1.93	0.797	-0.0308	1.58	2.99	2.38	0.512	0.481	PEPCK	OG5_128435	cytoplasm(points, patchy)	Peroxisome	ND	FALSE	FALSE	FALSE	FALSE	FALSE	FALSE	FALSE	FALSE	FALSE	FALSE	contractile vacuole	microtubule binding	gluconeogenesis
Tb927.2.4230	Q586V1	NA	NUP-1 protein, putative	8.58967e-05	0.00645625	0.0140343	0.202089	0.356697	0.631904	0.735623	0.712206	0.000779472	0.000679343	0.00177454	0.672125	0.430802	3.66	2.29	2.03	-0.999	-0.715	0.369	-0.26	0.284	2.97	3.01	2.71	0.326	0.61	Tb927.2.4230	OG5_153896	ND	Cytoplasm	242-270;802-821;946-965;1090-1109;1234-1253;1378-1397;1522-1541;1666-1685;1810-1829;1954-1973;2098-2117;2242-2261;2386-2405;2530-2549;2674-2693;2818-2837;2962-2981;3106-3149;3333-3353	FALSE	FALSE	FALSE	FALSE	FALSE	FALSE	FALSE	FALSE	FALSE	FALSE	nuclear lamina	N/A	N/A
Tb927.2.450	Q584M8	RHS4	retrotransposon hot spot protein 4 (RHS4), putative	0.659101	0.0218986	0.0180065	0.400082	0.827631	0.0517563	0.929302	0.29256	0.0012657	0.0020758	0.00101976	0.0776959	0.00782229	-0.247	1.36	1.41	0.473	-0.121	-1.13	0.0495	-0.595	2.04	1.93	2.09	-1.02	-1.62	RHS4	OG5_126555	ND	Cytoplasm	ND	FALSE	FALSE	FALSE	FALSE	FALSE	FALSE	FALSE	FALSE	FALSE	FALSE	nucleus	N/A	mRNA export from nucleus
Tb927.2.4550	Q586Q7	SPB1	2'-O-ribose RNA methyltransferase SPB1 homolog	0.133503	0.0193013	0.0203053	0.685827	0.0805882	0.58198	0.98166	0.168979	0.00180353	0.000104595	0.00190658	0.0965923	0.756523	1.03	1.67	1.66	0.271	1.21	-0.37	-0.0154	0.941	2.35	3.13	2.34	-1.15	-0.208	SPB1	OG5_126871	nucleolus	Nucleus	341-362;423-445;556-565;654-663	TRUE	FALSE	FALSE	FALSE	FALSE	FALSE	FALSE	FALSE	FALSE	FALSE	nucleolus	RNA methyltransferase activity	RNA methylation
Tb927.2.470	Q584M7	RHS4	retrotransposon hot spot protein 4 (RHS4), putative	2.40042e-06	0.249952	0.0420544	0.593137	0.741948	5.77322e-07	0.0029932	0.836558	0.000157956	0.572198	0.23534	0.00684042	0.00421048	-3.15	0.587	-1.07	0.269	0.165	-3.46	-1.66	-0.104	2.26	0.285	0.606	-1.48	-1.59	RHS4	OG5_126555	ND	Cytoplasm	13-25	FALSE	FALSE	FALSE	FALSE	FALSE	FALSE	FALSE	FALSE	FALSE	FALSE	nucleus	N/A	mRNA export from nucleus
Tb927.2.4710	Q26692	RRM1	RNA-binding protein, putative	0.0315955	0.291633	0.0188098	0.0365475	0.25165	0.00234411	0.158992	0.304898	0.137235	0.00105394	0.00664086	0.239457	0.875328	1.64	0.77	1.81	1.59	0.839	2.46	1.04	-0.749	1.1	2.69	2.14	0.862	0.113	RRM1	OG5_132833	nucleoplasm	Nucleus	328-441	FALSE	FALSE	FALSE	FALSE	FALSE	FALSE	FALSE	FALSE	FALSE	FALSE	nuclear speck	RNA binding	RNA processing
Tb927.2.5030	Q586U1	SPT5	transcription elongation factor SPT5, putative	0.00647853	0.19382	0.00722046	0.547447	0.163833	0.300528	0.118682	0.41557	0.0848157	0.0088245	0.00242983	0.991088	0.409349	2.04	0.907	2.01	-0.413	-0.974	0.717	1.1	-0.561	1.22	1.95	2.32	-0.00764	-0.569	SPT5	OG5_127919	nucleoplasm	Nucleus	50-59	FALSE	FALSE	FALSE	FALSE	FALSE	FALSE	FALSE	FALSE	FALSE	FALSE	DSIF complex	mRNA binding	regulation of transcription by RNA polymerase II
Tb927.2.560	Q584M5	RHS4	retrotransposon hot spot protein 4 (RHS4), putative	0.213887	0.0731228	0.177135	0.649288	0.626328	0.00152763	0.630094	0.35008	0.00349371	0.331704	0.010803	0.193886	0.703465	-0.701	1.03	0.763	-0.252	0.27	-1.98	-0.267	0.523	1.79	0.543	1.53	-0.734	-0.211	RHS4	OG5_126555	cytoplasm(reticulated)	Cytoplasm	34-47	FALSE	FALSE	FALSE	FALSE	FALSE	FALSE	FALSE	FALSE	FALSE	FALSE	cytoplasm	N/A	mRNA export from nucleus
Tb927.2.5800	Q586C9	SBPase	sedoheptulose-1,7-bisphosphatase	0.890777	0.0145089	0.00816915	0.960613	0.931589	0.0219631	0.80144	0.97091	0.00755261	0.00376842	0.00418372	0.0113371	0.0123172	0.097	1.85	2.03	0.0349	0.0606	-1.72	0.178	0.0257	2.06	2.27	2.23	-1.93	-1.91	SBPase	OG5_134853	nucleolus, cytoplasm(points)	Peroxisome	ND	FALSE	FALSE	FALSE	FALSE	FALSE	FALSE	FALSE	FALSE	FALSE	FALSE	cytoplasm	fructose 1,6-bisphosphate 1-phosphatase activity	fructose 1,6-bisphosphate metabolic process
Tb927.2.5820	Q586C7	NA	hypothetical protein, conserved	0.00219865	0.238707	0.0409792	0.895442	0.926042	0.0257647	0.346781	0.969199	0.169402	0.000778144	0.0263773	0.929389	0.898773	2.76	0.962	1.73	0.106	0.0746	1.9	0.764	-0.031	1.13	3.1	1.89	-0.0712	-0.102	Tb927.2.5820	OG5_161948	cytoplasm, flagellar cytoplasm	Cytoplasm	849-858;1012-1021	FALSE	FALSE	FALSE	FALSE	FALSE	FALSE	FALSE	FALSE	FALSE	FALSE	ciliary plasm	N/A	N/A
Tb927.2.6090	P17843	RPL44	60S ribosomal protein L44	0.000162796	0.0578676	0.012338	0.362137	0.706582	0.120288	0.474993	0.588278	0.0478703	0.00480023	0.00997149	0.572755	0.274071	-3.46	-1.52	-2.07	0.707	0.29	-1.23	-0.552	-0.417	-1.59	-2.39	-2.15	-0.435	-0.852	RPL44	OG5_126988	ND	Cytoplasm	ND	FALSE	FALSE	FALSE	FALSE	FALSE	FALSE	FALSE	FALSE	FALSE	FALSE	cytoplasm	structural constituent of ribosome	translation
Tb927.2.6100	Q586N7	NA	hypothetical protein, conserved	0.262402	0.01098	0.0135509	0.391881	0.387936	0.45697	0.926162	0.99414	0.0508689	0.984411	0.0613344	0.197466	0.195069	0.458	1.11	1.07	0.348	0.351	-0.302	-0.0373	0.00296	0.823	-0.00787	0.786	0.53	0.532	Tb927.2.6100	OG5_169834	cytoplasm(points)	Nucleus	29-39;152-161;194-241;377-408	FALSE	FALSE	FALSE	FALSE	FALSE	FALSE	FALSE	FALSE	FALSE	FALSE	cytoplasm	telomeric DNA binding	mitochondrial RNA processing
Tb927.3.1010	Q57WY4	CAP64	Cytoskeleton-associated protein 64 kDa	0.0685765	0.0815186	0.653215	0.804949	0.746311	0.00209272	0.184289	0.569453	0.0344685	0.648281	0.385688	0.103554	0.0330294	-0.712	0.679	0.169	0.0929	-0.122	-1.3	-0.51	-0.215	0.839	0.172	0.329	-0.632	-0.846	CAP64	OG5_158612	ND	Nucleus	203-225;582-591	FALSE	FALSE	FALSE	FALSE	FALSE	FALSE	FALSE	FALSE	FALSE	FALSE	cortical cytoskeleton	N/A	N/A
Tb927.3.1120	Q57WZ3	RTB2	GTP-binding nuclear protein rtb2, putative	0.375825	0.985664	0.567554	0.669465	0.855097	0.201013	0.555584	0.806506	0.194089	0.374763	0.0656665	0.385918	0.530818	-0.584	-0.0117	0.375	-0.28	-0.119	-0.852	0.387	0.16	0.866	0.585	1.25	-0.572	-0.411	RTB2	OG5_127514	nuclear pore	Cytoplasm	ND	FALSE	FALSE	FALSE	FALSE	FALSE	FALSE	FALSE	FALSE	FALSE	FALSE	cytoplasm	GTP binding	intracellular protein transport
Tb927.3.1350	Q57XW8	NA	hypothetical protein, conserved	0.253431	0.278102	0.208711	0.0387122	0.799951	0.933165	0.856355	0.0649521	0.00121496	1.65149e-05	0.000781163	0.0749838	0.000968086	-0.691	0.655	0.763	1.3	0.151	-0.05	0.108	-1.14	2.19	3.24	2.3	-1.1	-2.25	Tb927.3.1350	OG5_151359	nucleolus, nucleoplasm(weak), cytoplasm(weak)	Nucleus	ND	FALSE	FALSE	FALSE	FALSE	FALSE	FALSE	FALSE	FALSE	FALSE	FALSE	90S preribosome	N/A	maturation of SSU-rRNA from tricistronic rRNA transcript (SSU-rRNA, 5.8S rRNA, LSU-rRNA)
Tb927.3.1790	Q57ZD2	NA	pyruvate dehydrogenase E1 beta subunit, putative	0.912781	0.203702	0.0373453	0.195382	0.600175	0.932759	0.374053	0.0753488	0.0100844	8.40224e-05	0.00119655	0.0485029	0.00068382	-0.0803	0.95	1.61	0.969	-0.386	-0.0619	0.658	-1.35	2.04	3.5	2.7	-1.52	-2.87	Tb927.3.1790	OG5_127524	ND	Mitochondrion	ND	FALSE	FALSE	FALSE	FALSE	FALSE	FALSE	FALSE	FALSE	FALSE	FALSE	ciliary plasm	pyruvate dehydrogenase (acetyl-transferring) activity	acetyl-CoA biosynthetic process from pyruvate
Tb927.3.1840	Q57ZC7	NA	3-oxo-5-alpha-steroid 4-dehydrogenase, putative	0.836889	0.0514485	0.121617	0.000397279	0.576922	0.0690534	0.656852	0.00155951	0.0032618	0.0922813	0.00927735	0.00227691	0.875572	-0.146	1.45	1.13	2.94	0.398	1.34	-0.317	-2.54	2.32	1.24	2.01	2.43	-0.111	Tb927.3.1840	OG5_127767	nucleus, cytoplasm(reticulated, review)	Endoplasmic_reticulum	ND	FALSE	FALSE	FALSE	FALSE	FALSE	FALSE	FALSE	FALSE	FALSE	FALSE	cytoplasm	oxidoreductase activity	dolichol biosynthetic process
Tb927.3.190	Q57TR8	NA	variant surface glycoprotein (VSG), putative	0.17611	0.331893	0.0328468	0.0351827	0.0974363	0.0146508	0.211603	0.612034	0.0243128	1.13929e-05	0.00125094	0.561261	0.281429	0.895	0.635	1.46	1.44	1.11	1.7	0.824	-0.329	1.55	3.62	2.37	-0.378	-0.707	Tb927.3.190	OG5_152008	ND	Cell_membrane	238-247	FALSE	FALSE	FALSE	FALSE	FALSE	FALSE	FALSE	FALSE	FALSE	FALSE	integral component of membrane	N/A	antigenic variation
Tb927.3.1920	Q57ZB9	NOT5	General negative regulator of transcription subunit 5	0.000625724	0.0341489	0.10401	0.217869	0.761182	0.646369	0.578456	0.346992	0.0116043	0.00486052	0.0393481	0.932356	0.306549	2.77	1.57	1.18	-0.879	-0.213	0.322	-0.391	0.666	1.91	2.17	1.52	0.0595	0.725	NOT5	OG5_127689	cytoplasm(points, patchy)	Cytoplasm	215-224;408-428	TRUE	TRUE	FALSE	FALSE	FALSE	FALSE	FALSE	FALSE	FALSE	FALSE	CCR4-NOT core complex	poly(A)-specific ribonuclease activity	negative regulation of translation
Tb927.3.2050	Q57ZA6	MiRF172	Minicircle replication factor 172	0.0999874	0.00177131	0.00751549	0.0547921	0.0842764	2.80947e-07	0.544836	0.000911847	0.0652979	1.91213e-06	0.198485	0.296589	6.85575e-05	-0.886	1.84	1.52	-1.05	0.933	-3.77	-0.317	1.98	1	-3.32	0.684	0.551	2.53	MiRF172	OG5_150173	ND	Nucleus	11-34;882-896;941-952;1082-1283;1346-1381;1404-1572	FALSE	TRUE	FALSE	FALSE	FALSE	FALSE	FALSE	FALSE	FALSE	FALSE	kinesin complex	ATP hydrolysis activity	microtubule-based movement
Tb927.3.2230	Q582T6	NA	succinyl-CoA synthetase alpha subunit, putative	0.00107965	0.0957639	0.149071	0.614595	0.265158	0.143675	0.808321	0.533359	0.0147424	0.000292707	0.0252033	0.8886	0.446872	2.77	1.28	1.1	-0.375	-0.84	1.11	-0.18	-0.465	1.95	3.16	1.77	-0.104	-0.569	Tb927.3.2230	OG5_127106	ND	Mitochondrion	210-219	FALSE	TRUE	FALSE	FALSE	FALSE	FALSE	FALSE	FALSE	FALSE	FALSE	mitochondrion	succinate-CoA ligase (ADP-forming) activity	tricarboxylic acid cycle
Tb927.3.2310	Q582U4	PACRGA	parkin coregulated gene protein	0.0168157	0.938334	0.48653	0.162214	0.63688	0.00068301	0.535493	0.067362	0.690591	0.242056	0.823126	0.0281227	0.67328	2.12	0.0642	0.58	1.19	-0.393	3.25	0.516	-1.58	-0.331	0.986	0.185	1.93	0.35	PACRGA	OG5_129548	axoneme	Cytoplasm	ND	FALSE	FALSE	FALSE	FALSE	FALSE	FALSE	FALSE	FALSE	FALSE	FALSE	axoneme	Hsp70 protein binding	cilium-dependent cell motility
Tb927.3.2440	Q582V7	AEK1	AGC essential kinase 1	0.97744	0.378216	0.228073	0.570038	0.867378	0.728641	0.736493	0.687428	0.00784509	0.000171007	0.00355189	0.0639054	0.027693	-0.0177	0.558	0.769	0.357	0.105	-0.218	0.211	-0.253	1.82	2.81	2.03	-1.21	-1.46	AEK1	OG5_129514	cytoplasm, endocytic, flagellar cytoplasm, nuclear lumen	Nucleus	6-50	FALSE	FALSE	FALSE	FALSE	FALSE	FALSE	FALSE	FALSE	FALSE	FALSE	ciliary plasm	ATP binding	mitotic cytokinesis
Tb927.3.2470	Q582W0	PUF8	Pumilio homology domain family member 8	0.0243791	0.32168	0.924574	0.307891	0.563022	0.0260007	0.279176	0.652315	0.0792324	0.977006	0.472066	0.56969	0.312472	-1.33	0.555	-0.0524	0.572	0.322	-1.31	-0.608	-0.25	1.01	0.016	0.401	-0.316	-0.566	PUF8	OG5_128182	nucleolus	Nucleus	65-91;594-604	FALSE	FALSE	FALSE	FALSE	FALSE	FALSE	FALSE	FALSE	FALSE	FALSE	nucleolus	mRNA binding	regulation of translation
Tb927.3.2600	Q582X2	NA	ATP-dependent DEAD/H RNA helicase, putative	0.00712561	0.121606	0.0117881	0.739926	0.307257	0.317131	0.267157	0.181101	0.0437114	0.000162307	0.00346543	0.179721	0.996392	1.94	1.05	1.79	-0.219	0.682	0.668	0.743	0.902	1.4	2.97	2.14	-0.905	-0.00299	Tb927.3.2600	OG5_130134	cytoplasm(patchy)	Cytoplasm	667-692;1510-1519;1536-1557;1919-1956	FALSE	TRUE	FALSE	FALSE	FALSE	FALSE	FALSE	FALSE	FALSE	FALSE	cytoplasm	N/A	N/A
Tb927.3.2750	Q57ZN7	NA	hypothetical protein, conserved	0.0139782	0.111125	0.0331416	0.403292	0.775311	0.00214847	0.545281	0.578928	0.00629449	0.0946228	0.00147553	0.0383575	0.0113047	-1.38	0.856	1.17	0.439	0.149	-1.8	0.317	-0.29	1.56	0.901	1.88	-1.14	-1.43	Tb927.3.2750	OG5_154522	ND	Nucleus	300-309;773-788;803-812;816-825	FALSE	FALSE	FALSE	FALSE	FALSE	FALSE	FALSE	FALSE	FALSE	FALSE	nucleolus	N/A	N/A
Tb927.3.2830	Q57ZM9	NA	brix domain containing protein, putative	7.79481e-05	0.132007	0.0447942	0.0140849	0.856536	0.0011303	0.578101	0.00933088	0.00157869	0.00266511	0.000403947	0.00191394	2.16679e-06	-2.42	0.779	1.06	1.33	-0.0911	-1.87	0.281	-1.42	1.8	1.69	2.08	-1.76	-3.18	Tb927.3.2830	OG5_127732	ND	Nucleus	ND	FALSE	FALSE	FALSE	FALSE	FALSE	FALSE	FALSE	FALSE	FALSE	FALSE	nucleolus	rRNA binding	ribosomal large subunit assembly
Tb927.3.2950	Q57ZL7	NA	ribonuclease inhibitor- like protein	0.0101674	0.00127937	0.388403	0.119067	0.873042	0.0202251	0.0100937	0.0883366	0.000220854	0.0225187	0.122699	0.596054	0.225837	1.5	1.98	0.47	-0.867	0.0864	-1.34	-1.51	0.954	2.37	1.31	0.858	-0.288	0.666	Tb927.3.2950	OG5_128963	axoneme, cytoplasm(points, weak)	Cytoplasm	738-757	FALSE	FALSE	FALSE	FALSE	FALSE	FALSE	FALSE	FALSE	FALSE	FALSE	axoneme	N/A	N/A
Tb927.3.3200	Q57V66	NA	Domain of unknown function (DUF4586), putative	0.925318	0.253299	0.575038	0.132675	0.637596	0.771524	0.095547	0.289978	0.10988	0.584938	0.940373	0.17369	0.750498	-0.146	1.8	-0.874	2.4	0.733	0.451	-2.68	-1.67	2.56	0.851	-0.116	2.16	0.494	Tb927.3.3200	OG5_157970	axoneme(cell cycle dependent), cytoplasm(weak, points, reticulated)	Nucleus	139-161;297-316	FALSE	FALSE	FALSE	FALSE	FALSE	FALSE	FALSE	FALSE	FALSE	FALSE	axoneme	N/A	N/A
Tb927.3.3270	O15648	PFK	ATP-dependent 6-phosphofructokinase, glycosomal	0.345862	0.226491	0.0108442	0.704059	0.376141	0.512369	0.137459	0.211164	0.505475	0.99741	0.0372463	0.988703	0.206316	0.353	0.457	1.02	-0.141	0.331	-0.244	0.566	0.473	0.248	-0.0012	0.814	0.00525	0.478	PFK	OG5_126758	ND	Peroxisome	280-290	FALSE	FALSE	FALSE	FALSE	FALSE	FALSE	FALSE	FALSE	FALSE	FALSE	cytoplasm	6-phosphofructokinase activity	glycolytic process
Tb927.3.3300	Q57V56	FAZ19	Flagellum attachment zone protein 19	0.802331	0.409325	0.718897	0.80197	0.78909	0.409584	0.240812	0.605108	0.218318	0.596271	0.951292	0.912827	0.531775	0.202	-0.671	0.291	-0.203	0.216	0.671	0.962	0.419	-1.01	-0.429	-0.0493	0.0883	0.507	FAZ19	OG5_179256	flagellum attachment zone, cytoplasm(points, weak)	Nucleus	17-86	FALSE	FALSE	FALSE	FALSE	FALSE	FALSE	FALSE	FALSE	FALSE	FALSE	cilium	N/A	N/A
Tb927.3.3320	Q57V54	NA	60S ribosomal protein L13, putative	0.182235	0.166014	0.0278692	0.181226	0.430184	0.166955	0.00102591	0.0399806	0.70996	9.68497e-05	0.00041235	0.0073327	0.44748	-0.504	0.524	-0.862	0.505	-0.294	-0.523	-1.39	-0.799	-0.138	-1.74	-1.52	1.08	0.283	Tb927.3.3320	OG5_127128	cytoplasm(patchy)	Cytoplasm	37-48;200-210	FALSE	FALSE	FALSE	FALSE	FALSE	FALSE	FALSE	FALSE	FALSE	FALSE	cytoplasm	RNA binding	N/A
Tb927.3.3450	Q57XJ5	ARL3A	ADP-ribosylation factor-like protein 3, putative	0.0460312	0.943622	0.418769	0.327424	0.924725	0.0042893	0.3802	0.284453	0.0276793	0.000283298	0.00367029	0.232529	0.897206	1.66	-0.0562	0.648	0.788	-0.0752	2.51	0.704	-0.863	1.86	3.4	2.56	0.966	0.103	ARL3A	OG5_130091	axoneme, basal body, cytoplasm, nucleus(patchy)	Mitochondrion	ND	FALSE	TRUE	FALSE	FALSE	FALSE	FALSE	FALSE	FALSE	FALSE	FALSE	axoneme	GTP binding	cell population proliferation
Tb927.3.3560	Q57XK6	NA	U-box domain containing protein, putative	0.00212673	0.244079	0.883698	0.342165	0.567949	1.16296e-05	0.305553	0.135366	0.000270508	0.407886	0.00337446	0.643108	0.291494	-1.72	0.59	0.0729	-0.479	0.286	-2.79	-0.517	0.764	2.14	-0.416	1.62	-0.232	0.533	Tb927.3.3560	OG5_151268	axoneme, cytoplasm	Cytoplasm	459-486	FALSE	TRUE	FALSE	FALSE	FALSE	FALSE	FALSE	FALSE	FALSE	FALSE	axoneme	N/A	N/A
Tb927.3.3580	Q57W94	LPG3	heat shock protein 90, putative	0.268905	0.0345666	0.0227846	0.289438	0.38229	0.0312038	0.846402	0.847874	0.00232243	0.39034	0.00145378	0.790301	0.940834	-0.67	1.33	1.45	0.641	0.527	-1.36	0.116	-0.115	2.04	0.517	2.15	0.159	0.0443	LPG3	OG5_126623	ND	Endoplasmic_reticulum	ND	FALSE	TRUE	FALSE	FALSE	FALSE	FALSE	FALSE	FALSE	FALSE	FALSE	Golgi apparatus	unfolded protein binding	protein folding
Tb927.3.3590	Q57W95	NA	U3 small nucleolar ribonucleoprotein protein MPP10, putative	1.91319e-05	0.0713661	0.157738	0.288001	0.0963312	0.0224293	0.669431	0.523036	0.00541702	2.26335e-06	0.0145112	0.423013	0.157062	3.11	1.08	0.837	-0.623	-0.994	1.41	-0.248	-0.371	1.77	3.64	1.52	-0.467	-0.838	Tb927.3.3590	OG5_127902	nucleolus, cytoplasm	Nucleus	225-259;312-342	FALSE	FALSE	FALSE	FALSE	FALSE	FALSE	FALSE	FALSE	FALSE	FALSE	Mpp10 complex	N/A	N/A
Tb927.3.3670	Q57WA3	TRRM3	Triple RNA binding domain protein 3	0.10475	0.39636	0.253449	0.869386	0.357156	0.0124769	0.761075	0.447033	0.101523	0.0139154	0.0561394	0.00130538	0.000200445	-0.999	0.51	0.692	-0.0982	-0.555	-1.61	0.182	-0.457	1.01	1.58	1.19	-2.18	-2.63	TRRM3	OG5_152835	nucleolus(strong)	Nucleus	1-55;366-377;532-552;569-591;602-623	FALSE	TRUE	FALSE	FALSE	FALSE	FALSE	FALSE	FALSE	FALSE	FALSE	nucleolus	RNA binding	RNA processing
Tb927.3.3770	Q57WB3	PFC6	paraflagellar rod component, putative	0.134619	0.512249	0.797546	0.150165	0.616556	0.0265752	0.688284	0.33607	0.200838	0.0476423	0.371431	0.124214	0.544549	1.49	0.637	0.248	1.43	0.486	2.28	-0.389	-0.941	1.26	2.01	0.873	1.53	0.589	PFC6	OG5_154620	ND	Cytoplasm	ND	FALSE	FALSE	FALSE	FALSE	FALSE	FALSE	FALSE	FALSE	FALSE	FALSE	paraflagellar rod	N/A	N/A
Tb927.3.3950	Q57WD1	NA	hypothetical protein, conserved	0.00363629	0.702838	0.32157	0.385733	0.109741	0.0011075	0.536652	0.0182614	0.0689413	1.50924e-05	0.0187207	0.898966	0.0241384	1.73	0.205	0.539	0.47	-0.886	2	0.333	-1.36	1.02	2.94	1.35	0.0682	-1.29	Tb927.3.3950	OG5_153038	ND	Nucleus	48-57;105-130;179-221;405-416	FALSE	FALSE	FALSE	FALSE	FALSE	FALSE	FALSE	FALSE	FALSE	FALSE	cytosol	N/A	ribosomal small subunit biogenesis
Tb927.3.4300	Q580L2	PFR1-2	Paraflagellar rod protein 1-2	0.14567	0.355082	0.903584	0.0873984	0.753226	0.00034223	0.297475	0.155428	0.732918	0.0760225	0.478085	0.0542205	0.578804	1.42	-0.889	0.115	1.68	0.299	3.99	1	-1.38	-0.325	1.75	0.679	1.91	0.53	PFR1-2	OG5_130385	ND	Cytoplasm	ND	FALSE	FALSE	FALSE	FALSE	FALSE	FALSE	FALSE	FALSE	FALSE	FALSE	ciliary plasm	N/A	cilium-dependent cell motility
Tb927.3.4680	Q582R7	NA	RAB GDP dissociation inhibitor alpha, putative	0.0103159	0.318366	0.0348329	0.852278	0.823803	0.124182	0.231744	0.970886	0.0290545	0.00124437	0.00175114	0.822749	0.851216	2.13	0.774	1.71	-0.143	-0.171	1.21	0.933	-0.028	1.77	2.81	2.71	0.172	0.144	Tb927.3.4680	OG5_127353	cytoplasm	Cytoplasm	ND	FALSE	FALSE	FALSE	FALSE	FALSE	FALSE	FALSE	FALSE	FALSE	FALSE	cytoplasm	Rab GDP-dissociation inhibitor activity	vesicle-mediated transport
Tb927.3.4720	Q582R3	DLP1	dynamin-1-like protein	0.06214	0.762115	0.217136	0.195635	0.436063	0.358516	0.12912	0.593493	0.0378193	0.00935203	0.00102827	0.768734	0.410342	1.2	-0.187	0.777	-0.816	-0.485	0.573	0.964	0.331	1.35	1.74	2.32	0.182	0.513	DLP1	OG5_126660	ND	Cytoplasm	ND	FALSE	FALSE	FALSE	FALSE	FALSE	FALSE	FALSE	FALSE	TRUE	FALSE	cell tip	GTPase activity	mitochondrial fission
Tb927.3.4750	Q6Q832	NA	Aminopeptidase M1, putative	0.0680864	0.0020209	0.00568512	0.300709	0.216008	0.014805	0.664966	0.832391	0.00056558	0.0250657	0.00162975	0.319916	0.231086	1.11	2.03	1.78	-0.614	-0.738	-1.53	-0.254	-0.124	2.34	1.39	2.08	-0.59	-0.714	Tb927.3.4750	OG5_145268	ND	Peroxisome	ND	FALSE	FALSE	TRUE	FALSE	FALSE	FALSE	FALSE	FALSE	FALSE	FALSE	ciliary plasm	metalloaminopeptidase activity	peptide catabolic process
Tb927.3.4910	Q582P4	NA	signal peptide peptidase, putative	0.0835695	0.0401238	0.0350773	0.671472	0.707126	0.432605	0.94896	0.961172	0.000457617	0.00092285	0.000391134	0.615434	0.6498	0.712	0.857	0.883	-0.169	-0.149	-0.314	0.0254	0.0193	1.62	1.51	1.65	-0.2	-0.181	Tb927.3.4910	OG5_128374	ND	Endoplasmic_reticulum	337-347	FALSE	FALSE	FALSE	FALSE	FALSE	FALSE	FALSE	FALSE	FALSE	FALSE	integral component of cytoplasmic side of endoplasmic reticulum membrane	aspartic endopeptidase activity, intramembrane cleaving	membrane protein proteolysis
Tb927.3.5050	Q582N2	NA	60S ribosomal protein L4	0.815108	0.630461	0.508563	0.42308	0.712108	0.927661	0.258605	0.662415	0.13459	0.219543	0.0127701	0.844749	0.528361	-0.0962	0.198	-0.273	0.332	0.152	0.0373	-0.471	-0.18	-0.632	-0.514	-1.1	-0.0805	-0.26	Tb927.3.5050	OG5_127050	nucleolus, cytoplasm	Nucleus	320-330;354-374	FALSE	FALSE	FALSE	FALSE	FALSE	FALSE	FALSE	FALSE	FALSE	FALSE	cytoplasm	RNA binding	translation
Tb927.3.5330	Q580U2	Cnt-b5	centaurin beta 5	0.390646	0.0553155	0.271289	0.982651	0.665654	0.00879645	0.379769	0.681432	0.0228015	0.191074	0.134567	0.0894458	0.187213	-0.735	1.7	0.947	0.0184	0.367	-2.41	-0.752	0.349	2.06	1.13	1.3	-1.49	-1.14	Cnt-b5	OG5_127190	endocytic, nucleolus	Nucleus	ND	FALSE	FALSE	FALSE	FALSE	FALSE	FALSE	FALSE	FALSE	FALSE	FALSE	Golgi apparatus	GTPase activator activity	N/A
Tb927.3.5370	Q580T8	NA	hypothetical protein, conserved	0.00527845	0.0109663	0.315791	0.351352	0.988598	7.90807e-07	0.000981664	0.344239	0.00795336	0.000120806	0.385552	0.454233	0.0980401	-1.17	1.05	-0.389	-0.36	0.00547	-2.59	-1.44	0.366	1.11	-1.77	-0.335	0.288	0.654	Tb927.3.5370	OG5_152260	nuclear lumen(points)	Nucleus	139-203;217-236;252-261	FALSE	FALSE	FALSE	FALSE	FALSE	FALSE	FALSE	FALSE	FALSE	FALSE	kinetoplast	N/A	N/A
Tb927.3.5400	Q580T5	RIO1	serine/threonine protein kinase RIO1, putative	0.0168703	0.0266368	0.0248311	0.432492	0.947717	0.323504	0.974145	0.47112	0.00799033	5.89866e-06	0.00741167	0.0564782	0.0118313	1.49	1.37	1.39	0.46	0.0381	0.581	0.0188	-0.421	1.68	3.42	1.7	-1.16	-1.58	RIO1	OG5_127476	nucleolus, cytoplasm	Nucleus	100-110;475-502;553-572	FALSE	FALSE	FALSE	FALSE	FALSE	FALSE	FALSE	FALSE	FALSE	FALSE	cytoplasm	protein serine/threonine kinase activity	N/A
Tb927.3.5540	Q580S1	DIC5	dynein intermediate chain WDRD34, putative	0.000192908	0.827484	0.122099	0.053473	0.411476	0.0373642	0.179125	0.00878846	0.362147	1.81719e-05	0.0302176	0.0303725	0.579228	2.77	0.136	0.994	-1.26	0.517	1.37	0.858	1.78	0.575	3.38	1.43	-1.43	0.348	DIC5	OG5_132245	axoneme, cytoplasm	Cytoplasm	ND	FALSE	FALSE	FALSE	FALSE	FALSE	FALSE	FALSE	FALSE	FALSE	FALSE	ciliary basal body	dynein heavy chain binding	cilium-dependent cell motility
Tb927.3.5620	Q580R3	NA	Facilitates chromatin transcription complex subunit spt16	0.00112779	0.0095962	0.0453401	0.0113662	0.0213482	0.0771077	0.480892	0.778429	0.000617087	2.64615e-05	0.00343927	0.0045803	0.00884373	2.41	1.83	1.37	-1.78	-1.6	-1.19	-0.461	0.183	2.57	3.41	2.11	-2.03	-1.85	Tb927.3.5620	OG5_128055	ND	Nucleus	734-743;898-961	FALSE	TRUE	FALSE	FALSE	FALSE	FALSE	FALSE	FALSE	FALSE	FALSE	nucleoplasm	N/A	N/A
Tb927.3.820	Q57WW5	NA	LSU ribosomal protein, mitochondrial, putative	0.000485774	0.113581	0.0127419	0.200684	0.306221	0.270277	0.297924	0.0272685	0.0024067	2.27846e-06	0.000183609	0.0864318	0.573519	2.69	1.08	1.78	-0.867	0.689	0.743	0.701	1.56	2.26	4.18	2.96	-1.18	0.376	Tb927.3.820	OG5_154592	ND	Mitochondrion	ND	FALSE	FALSE	FALSE	FALSE	FALSE	FALSE	TRUE	FALSE	FALSE	FALSE	kinetoplast	N/A	posttranscriptional regulation of gene expression
Tb927.3.930	Q57WX6	OADalpha	dynein heavy chain, putative	7.09482e-05	0.0496535	0.0224125	0.196931	0.221541	0.152078	0.707792	0.942772	0.00930207	6.0981e-05	0.00386287	0.542641	0.590672	3.3	1.4	1.66	-0.899	-0.85	1	0.256	0.049	1.93	3.35	2.18	-0.418	-0.369	OADalpha	OG5_126558	axoneme	Cytoplasm	3389-3399	FALSE	FALSE	FALSE	FALSE	FALSE	FALSE	FALSE	FALSE	FALSE	FALSE	axoneme	dynein intermediate chain binding	microtubule-based movement
Tb927.4.1080	Q580D6	VAA	V-type ATPase, A subunit, putative	0.010086	0.00887601	0.117632	0.547406	0.903043	0.584589	0.226116	0.47053	0.00225557	0.00141128	0.0374985	0.723177	0.710844	2.21	2.25	1.28	0.479	-0.0965	0.435	-0.976	-0.575	2.71	2.87	1.74	0.281	-0.294	VAA	OG5_127237	ND	Cytoplasm	ND	FALSE	FALSE	FALSE	FALSE	FALSE	FALSE	FALSE	FALSE	FALSE	FALSE	acidocalcisome	proton-transporting ATPase activity, rotational mechanism	endocytosis
Tb927.4.1100	Q580D8	NA	ribosomal protein L21E (60S), putative	0.0939284	0.357989	0.00812969	0.679618	0.382216	0.697284	0.0611754	0.203733	0.675064	0.506791	0.0254627	0.886746	0.160102	-1.08	-0.58	-1.8	0.259	-0.551	-0.244	-1.22	-0.81	-0.263	-0.417	-1.48	-0.0891	-0.899	Tb927.4.1100	OG5_126766	cytoplasm(patchy)	Cytoplasm	ND	FALSE	FALSE	FALSE	FALSE	FALSE	FALSE	FALSE	FALSE	FALSE	FALSE	cytoplasm	structural constituent of ribosome	N/A
Tb927.4.1300	Q581V1	CAP42	Cytoskeleton-associated protein 42 kDa	0.000337353	0.133028	0.0505891	0.73334	0.000732636	0.0061591	0.615856	0.000317544	0.0719771	0.00782812	0.0254075	0.0586776	0.0328572	2.96	1.09	1.44	0.24	-2.74	2.11	0.354	-2.98	1.32	2.04	1.67	1.39	-1.59	CAP42	OG5_148035	ND	Cytoplasm	ND	FALSE	FALSE	FALSE	FALSE	FALSE	FALSE	FALSE	FALSE	FALSE	FALSE	cortical cytoskeleton	N/A	mitotic cleavage furrow ingression
Tb927.4.1330	Q581U8	NA	DNA topoisomerase IB, large subunit	0.733428	0.882404	0.567695	0.089456	0.275548	0.0333411	0.473222	0.516616	0.466181	0.997452	0.990685	0.141081	0.394756	-0.165	0.0714	-0.277	-0.848	-0.533	-1.08	-0.348	0.314	0.354	-0.00154	0.00563	-0.728	-0.414	Tb927.4.1330	OG5_127702	nucleoplasm	Nucleus	585-691	FALSE	FALSE	FALSE	FALSE	FALSE	FALSE	FALSE	FALSE	FALSE	FALSE	membrane	DNA topoisomerase type I (single strand cut, ATP-independent) activity	DNA topological change
Tb927.4.1680	Q581R3	ZC3H10	ZFP family member, putative	0.0851659	0.100596	0.0391687	0.978973	0.592547	0.00184786	0.635935	0.574642	0.0852288	0.300759	0.0325734	0.502422	0.911679	-1.04	0.993	1.27	-0.0154	0.315	-2.05	0.278	0.33	1.04	-0.614	1.32	-0.395	-0.065	ZC3H10	OG5_154567	axoneme, cytoplasm	Nucleus	217-227	FALSE	FALSE	FALSE	FALSE	FALSE	FALSE	FALSE	FALSE	FALSE	FALSE	axoneme	N/A	N/A
Tb927.4.1800	Q581Q1	MRPL3	Mitochondrial ribosomal protein L3	0.00132437	0.124935	0.00818877	0.825152	0.343514	0.0757953	0.202377	0.46438	0.00029807	1.43604e-05	1.27523e-05	0.554172	0.88685	-1.96	-0.851	-1.55	0.119	0.516	-0.994	-0.701	0.397	-2.29	-2.97	-2.99	-0.32	0.0767	MRPL3	OG5_126874	ND	Cytoplasm	393-423	FALSE	FALSE	FALSE	FALSE	FALSE	FALSE	FALSE	FALSE	FALSE	FALSE	cytosolic large ribosomal subunit	RNA binding	ribosomal large subunit assembly
Tb927.4.2070	Q583I6	NA	antigenic protein, putative	0.000226947	0.611543	0.0141961	0.0170581	0.756574	0.202411	0.0428379	0.0335102	0.57624	0.208264	0.12761	0.587985	0.0996414	2.63	0.307	1.59	-1.54	-0.187	0.784	1.28	1.35	-0.338	0.774	0.945	-0.328	1.03	Tb927.4.2070	OG5_136908	ND	Cytoplasm	566-575;731-745;4380-4391	FALSE	FALSE	FALSE	FALSE	FALSE	FALSE	FALSE	FALSE	TRUE	FALSE	cortical cytoskeleton	N/A	N/A
Tb927.4.2180	Q584G9	NA	60S ribosomal protein L35a, putative	0.213625	0.659728	0.0254066	0.561769	0.4756	0.267358	0.00946716	0.20217	0.490421	0.945943	0.0433794	0.716202	0.106622	-0.624	0.217	-1.17	0.287	-0.354	-0.554	-1.39	-0.64	0.342	-0.0334	-1.04	-0.179	-0.82	Tb927.4.2180	OG5_127072	ND	Cytoplasm	ND	FALSE	FALSE	FALSE	FALSE	FALSE	FALSE	FALSE	FALSE	FALSE	FALSE	cytosolic large ribosomal subunit	structural constituent of ribosome	cytoplasmic translation
Tb927.4.2630	Q584C4	NA	ATP-dependent DEAD/H RNA helicase, putative	0.00101054	0.172404	0.462844	0.469419	0.827359	0.000197199	0.513856	0.349085	0.0123745	0.910635	0.0511186	0.117595	0.0169541	-2.52	0.938	0.497	0.489	-0.147	-2.97	-0.441	-0.636	1.81	-0.0755	1.37	-1.08	-1.72	Tb927.4.2630	OG5_128298	nucleolus	Nucleus	12-21;834-843	FALSE	FALSE	FALSE	FALSE	FALSE	FALSE	FALSE	FALSE	FALSE	FALSE	nucleolus	ATP binding	nucleobase-containing compound metabolic process
Tb927.4.2920	Q583W9	NA	hypothetical protein, conserved	0.375649	0.0822428	0.0074248	0.41915	0.902836	0.0958074	0.270324	0.491333	0.00593798	0.031519	0.000398631	0.332966	0.774404	0.444	0.895	1.45	-0.405	-0.0607	-0.855	0.556	0.344	1.5	1.13	2.05	-0.486	-0.143	Tb927.4.2920	OG5_161433	ND	Cytoplasm	222-232;908-917	FALSE	FALSE	FALSE	FALSE	FALSE	FALSE	FALSE	FALSE	FALSE	FALSE	axoneme	N/A	N/A
Tb927.4.3060	Q583Y3	NA	hypothetical protein, conserved	0.178947	0.320168	0.0942636	0.908897	0.85511	0.0321007	0.471629	0.945608	0.393507	0.00884529	0.891531	0.778935	0.831617	-1.47	1.08	1.85	0.123	0.196	-2.42	0.775	0.073	-0.921	-3.04	-0.146	-0.301	-0.228	Tb927.4.3060	OG5_162295	ND	Nucleus	22-41;53-84;115-144	FALSE	FALSE	FALSE	FALSE	FALSE	FALSE	FALSE	FALSE	FALSE	FALSE	nucleoplasm	N/A	N/A
Tb927.4.3550	Q585J5	NA	60S ribosomal protein L13a, putative	0.943934	0.406464	0.0201649	0.27976	0.531364	0.0552241	0.111097	0.641299	0.666084	0.317954	0.0477447	0.576777	0.925851	0.026	-0.309	-0.916	0.405	0.232	0.74	-0.606	-0.173	-0.16	0.373	-0.766	0.207	0.0344	Tb927.4.3550	OG5_126957	cytoplasm(patchy), nucleolus(50%, strong)	Cytoplasm	5-14	FALSE	FALSE	FALSE	FALSE	FALSE	FALSE	FALSE	FALSE	FALSE	FALSE	cytoplasm	mRNA binding	negative regulation of translation
Tb927.4.3630	Q585I7	PP1-5	serine threonine-protein phosphatase PP1, putative	5.65465e-05	0.152845	0.115614	0.459243	0.458309	0.0116787	0.876226	0.145844	0.00702757	7.51178e-06	0.00487751	0.912747	0.176335	2.91	0.864	0.956	-0.44	0.441	1.61	0.092	0.88	1.74	3.41	1.83	-0.0647	0.816	PP1-5	OG5_247809	axoneme, cytoplasm, basal body(review)	Cytoplasm	ND	FALSE	FALSE	TRUE	FALSE	FALSE	FALSE	FALSE	FALSE	FALSE	FALSE	axoneme	hydrolase activity	modulation of formation of structure involved in a symbiotic process
Tb927.4.3840	Q583H8	NA	nucleolar protein, putative	0.00497461	0.19408	0.528204	0.556188	0.57363	0.000849646	0.491915	0.979175	0.0143743	0.637874	0.0626956	0.106363	0.101309	-1.63	0.7	0.335	0.312	0.298	-2.02	-0.365	-0.0138	1.39	0.249	1.02	-0.88	-0.894	Tb927.4.3840	OG5_126796	nucleolus	Nucleus	68-105;181-190;569-578	FALSE	FALSE	FALSE	FALSE	FALSE	FALSE	FALSE	FALSE	FALSE	FALSE	nucleolus	N/A	N/A
Tb927.4.3850	Q583H9	NA	NLE (NUC135) domain/WD domain, G-beta repeat, putative	0.0102041	0.00890898	0.138543	0.27571	0.684191	0.251575	0.195427	0.48772	2.43773e-06	8.56749e-07	5.55793e-05	0.114403	0.358052	1.36	1.38	0.741	-0.539	-0.199	-0.567	-0.644	0.34	3.05	3.28	2.41	-0.792	-0.452	Tb927.4.3850	OG5_128164	nucleolus(strong, <10%), nucleoplasm	Cytoplasm	323-336	FALSE	FALSE	FALSE	FALSE	FALSE	FALSE	FALSE	FALSE	FALSE	FALSE	nucleolus	N/A	N/A
Tb927.4.4490	Q95PL4	MRPE	multidrug resistance protein E	0.0933328	0.0491832	0.028308	0.714781	0.804293	0.967141	0.792621	0.541006	0.000601955	5.53264e-05	0.000315794	0.354918	0.131747	0.892	1.06	1.19	0.188	-0.127	0.0212	0.135	-0.316	2.04	2.54	2.17	-0.48	-0.796	MRPE	OG5_126561	ND	Cell_membrane	706-741	FALSE	FALSE	FALSE	FALSE	FALSE	FALSE	FALSE	FALSE	FALSE	FALSE	ATP-binding cassette (ABC) transporter complex	ATP binding	response to drug
Tb927.4.4690	Q583F4	NA	hypothetical protein, conserved	0.724061	0.864418	0.358073	0.0167683	0.607245	0.00502456	0.278408	0.0505559	0.87244	0.134062	0.216069	0.09818	0.735571	0.392	-0.189	1.03	2.84	0.571	3.42	1.22	-2.27	0.178	1.7	1.4	1.89	-0.375	Tb927.4.4690	OG5_146053	axoneme, cytoplasm(weak, reticulated), cytoplasm(points)	Nucleus	ND	FALSE	FALSE	FALSE	FALSE	FALSE	FALSE	FALSE	FALSE	FALSE	FALSE	axoneme	N/A	N/A
Tb927.4.470	Q57US8	NA	snoRNP protein GAR1, putative	0.0318493	0.278336	0.664343	0.384505	0.9628	0.0505872	0.508652	0.360205	0.179256	0.00931563	0.481674	0.552307	0.743766	2.2	1.07	0.423	0.853	-0.0453	1.99	-0.646	-0.898	1.33	2.74	0.688	0.58	-0.318	Tb927.4.470	OG5_128232	ND	Nucleus	1-81;114-229	FALSE	FALSE	FALSE	FALSE	FALSE	FALSE	FALSE	FALSE	FALSE	FALSE	box H/ACA snoRNP complex	box H/ACA snoRNA binding	snoRNA guided rRNA pseudouridine synthesis
Tb927.4.4700	Q583F5	NA	hypothetical protein, conserved	0.403293	0.546234	0.136246	0.00982521	0.249977	0.00567155	0.360384	0.11363	0.494392	0.176055	0.11767	0.0273318	0.480503	0.854	0.614	1.55	2.84	1.18	3.08	0.936	-1.65	0.696	1.4	1.63	2.37	0.719	Tb927.4.4700	OG5_143475	axoneme, cytoplasm(weak)	Nucleus	190-204	FALSE	FALSE	FALSE	FALSE	FALSE	FALSE	FALSE	FALSE	FALSE	FALSE	axoneme	N/A	N/A
Tb927.4.4950	Q584L0	NOP61	Nucleolar protein 61	2.99466e-05	0.70301	0.483077	0.0268203	0.489827	0.00358777	0.746594	0.108721	0.00641255	0.0643903	0.00298224	0.0389674	0.000846209	-2.45	0.18	0.333	1.11	0.328	-1.52	0.153	-0.781	1.41	0.909	1.56	-1.03	-1.81	NOP61	OG5_140314	nucleolus, cytoplasm(reticulated, weak)	Nucleus	29-39;162-184	FALSE	FALSE	FALSE	FALSE	FALSE	FALSE	FALSE	FALSE	FALSE	FALSE	nucleolus	N/A	N/A
Tb927.4.5120	Q584J4	NA	hypothetical protein, conserved	0.540916	0.152016	0.47916	0.738777	0.332971	0.0231639	0.45271	0.197987	0.00138167	0.194854	0.00834693	0.909984	0.237943	-0.356	0.852	0.413	-0.194	0.568	-1.4	-0.439	0.762	2.1	0.767	1.66	-0.0656	0.696	Tb927.4.5120	OG5_126854	ND	Nucleus	2-18;362-1210	FALSE	FALSE	FALSE	FALSE	FALSE	FALSE	FALSE	FALSE	FALSE	FALSE	N/A	N/A	N/A
Tb927.4.5310	Q580Q4	RDK2	Repressor of differentiation kinase 2	0.197331	0.00382252	0.0155048	0.458092	0.986224	0.0142749	0.547013	0.468421	9.67712e-05	3.09549e-06	0.00042584	0.000456304	0.00269068	0.735	1.79	1.45	-0.418	-0.00966	-1.47	-0.338	0.408	2.63	3.44	2.3	-2.28	-1.87	RDK2	OG5_142254	ND	Cytoplasm	ND	FALSE	FALSE	FALSE	FALSE	FALSE	FALSE	TRUE	FALSE	FALSE	FALSE	ciliary plasm	ATP binding	modulation of formation of structure involved in a symbiotic process
Tb927.4.5390	Q580P8	NRKA	serine/threonine-protein kinase NrkA	0.817129	0.623286	0.818827	0.0196961	0.136946	0.0346459	0.792407	0.340805	0.00167942	4.5704e-06	0.00316532	0.829857	0.246351	0.149	0.317	0.147	1.6	0.982	1.43	-0.169	-0.619	2.28	3.85	2.11	-0.138	-0.758	NRKA	OG5_139463	ND	Cytoplasm	ND	FALSE	TRUE	TRUE	FALSE	FALSE	FALSE	FALSE	FALSE	FALSE	FALSE	N/A	ATP binding	protein phosphorylation
Tb927.4.760	Q580A4	NA	AP-1 adapter complex gamma subunit, putative	0.205217	0.00140826	0.00292346	0.938836	0.908226	0.0331423	0.7623	0.969245	0.00026134	0.00308622	0.000549142	0.22475	0.239063	0.843	2.36	2.16	0.0501	0.0753	-1.47	-0.198	0.0252	2.81	2.15	2.61	-0.807	-0.782	Tb927.4.760	OG5_127319	ND	Cytoplasm	422-431;624-633;672-692	FALSE	TRUE	FALSE	FALSE	FALSE	FALSE	FALSE	FALSE	FALSE	FALSE	AP-1 adaptor complex	cargo adaptor activity	Golgi to vacuole transport
Tb927.5.1080	Q57W53	RBP22	RNA-binding protein, putative	0.273081	0.00265176	0.119038	0.00578132	0.639621	0.436673	0.0906386	0.0169465	0.000477032	6.43977e-06	0.0291314	0.324131	0.00163839	0.52	1.57	0.75	1.42	0.22	0.366	-0.819	-1.2	1.9	2.73	1.08	-0.467	-1.66	RBP22	OG5_127993	nucleolus, nucleoplasm(weak)	Nucleus	81-90;227-236	FALSE	FALSE	FALSE	FALSE	FALSE	FALSE	FALSE	FALSE	FALSE	FALSE	nucleolus	RNA binding	RNA processing
Tb927.5.1210	Q57VE2	NA	short-chain dehydrogenase, putative	0.282782	0.0209515	0.0754547	0.758814	0.228995	0.292998	0.53989	0.135906	9.9271e-05	0.000786779	0.000448699	0.825691	0.0905071	0.7	1.58	1.19	0.198	-0.787	-0.685	-0.396	-0.985	3.02	2.48	2.63	-0.142	-1.13	Tb927.5.1210	OG5_126812	endoplasmic reticulum	Endoplasmic_reticulum	ND	FALSE	TRUE	FALSE	FALSE	FALSE	FALSE	FALSE	FALSE	FALSE	FALSE	endoplasmic reticulum	N/A	N/A
Tb927.5.1560	Q57VA7	NA	ATP-dependent DEAD/H RNA helicase, putative	5.16305e-10	0.157034	0.00292832	0.699525	0.783276	8.58628e-11	8.53932e-05	0.510178	5.52567e-05	0.0188056	0.858083	0.000469327	9.27351e-05	-4.46	0.618	-1.41	0.165	-0.117	-4.91	-2.03	-0.282	2.11	-1.07	0.0763	-1.73	-2.02	Tb927.5.1560	OG5_128093	nucleolus	Nucleus	166-176;395-405;703-712	FALSE	FALSE	FALSE	FALSE	FALSE	FALSE	FALSE	FALSE	FALSE	FALSE	nucleolus	ATP binding	nucleobase-containing compound metabolic process
Tb927.5.2090	Q57ZS8	KIN2A	kinesin, putative	4.33447e-06	0.0354146	7.55411e-05	0.0192526	0.601503	0.204641	0.0155784	0.0583187	0.00994684	0.777293	0.843198	0.0851625	0.847224	3.36	1.24	2.69	-1.4	-0.293	0.723	1.45	1.11	-1.56	0.158	-0.111	-0.998	0.108	KIN2A	OG5_127071	cytoplasm(weak, reticulated, points)	Cytoplasm	512-584;833-842;859-868;991-1010	FALSE	FALSE	FALSE	FALSE	FALSE	FALSE	FALSE	FALSE	TRUE	FALSE	ciliary basal body	ATP binding	cilium assembly
Tb927.5.2270	Q582D8	CMF44	Component of motile flagella 44	0.138939	0.720116	0.390889	0.0769707	0.822899	0.00622154	0.613466	0.0492274	0.562432	0.0402579	0.283069	0.165127	0.524456	1.48	0.349	0.841	1.78	-0.218	2.91	0.492	-2	0.565	2.1	1.06	1.38	-0.622	CMF44	OG5_131311	axoneme	Cytoplasm	330-341	FALSE	FALSE	FALSE	FALSE	FALSE	FALSE	FALSE	FALSE	FALSE	FALSE	axoneme	N/A	N/A
Tb927.5.2660	Q57ZU2	NA	NUC130/3NT domain/SDA1, putative	0.00933358	0.0583585	0.0168083	0.815307	0.868381	0.000139259	0.559835	0.945815	0.238227	0.382737	0.0849828	0.0199876	0.0171936	-1.68	1.18	1.53	0.139	0.0989	-2.72	0.349	-0.0405	0.715	-0.525	1.06	-1.48	-1.52	Tb927.5.2660	OG5_128086	nucleolus(50%)	Nucleus	276-285;497-531;593-693	FALSE	FALSE	FALSE	FALSE	FALSE	FALSE	TRUE	FALSE	FALSE	FALSE	nucleolus	N/A	ribosomal large subunit biogenesis
Tb927.5.2790	Q57ZV5	Pol beta-PAK	mitochondrial DNA polymerase beta-PAK	0.349003	0.849689	0.0035403	0.0753462	0.17385	0.0152957	0.00224794	0.00351999	0.607176	0.117568	0.000641508	0.634731	0.0107188	-0.492	-0.0985	1.68	-0.959	0.722	-1.35	1.78	1.68	0.268	-0.837	2.05	-0.247	1.43	Pol beta-PAK	OG5_140397	kinetoplast	Nucleus	1-326	FALSE	FALSE	FALSE	FALSE	FALSE	FALSE	FALSE	FALSE	FALSE	FALSE	antipodal site	DNA-directed DNA polymerase activity	double-strand break repair via nonhomologous end joining
Tb927.5.2950	Q57ZX1	CMF3	Component of motile flagella 3	0.37847	0.842893	0.176977	0.218131	0.794437	0.0621412	0.244996	0.326185	0.180739	0.0840591	0.0172873	0.138268	0.598429	1.02	0.229	1.59	1.45	0.301	2.24	1.36	-1.15	1.58	2.06	2.94	1.75	0.609	CMF3	OG5_149974	axoneme, cytoplasm	Cytoplasm	ND	FALSE	FALSE	FALSE	FALSE	FALSE	FALSE	FALSE	FALSE	FALSE	FALSE	axoneme	alpha-tubulin binding	cilium-dependent cell motility
Tb927.5.295b	B2ZWB7	RHS1	retrotransposon hotspot (RHS) protein 1	0.0607225	0.000459409	0.0319385	0.274221	0.850099	0.00358598	0.0810413	0.362336	3.08927e-05	2.00576e-06	0.00254031	0.000211568	0.00200113	0.962	2	1.11	-0.545	-0.093	-1.59	-0.89	0.452	2.55	3.12	1.66	-2.16	-1.71	RHS1	OG5_126555	kinetoplast, mitochondrion	Mitochondrion	814-825	FALSE	FALSE	FALSE	FALSE	FALSE	FALSE	FALSE	FALSE	FALSE	FALSE	cytoplasm	N/A	N/A
Tb927.5.3050	Q57ZY1	PARP	poly(adp-ribose) polymerase	0.0207604	0.00568054	2.73393e-05	0.702796	0.991619	0.346736	0.036904	0.69506	0.00654227	0.0144933	3.16147e-05	0.547492	0.832672	1.03	1.27	2.19	-0.16	0.0044	-0.398	0.921	0.165	1.25	1.1	2.17	-0.253	-0.0886	PARP	OG5_128423	cytoplasm(reticulated, weak)	Nucleus	36-80;205-222	FALSE	FALSE	FALSE	FALSE	FALSE	FALSE	FALSE	FALSE	FALSE	FALSE	cytoplasm	DNA binding	double-strand break repair
Tb927.5.3120	Q57Z81	EIF2B	eukaryotic translation initiation factor 2 beta subunit, putative	0.0005426	0.0383338	0.0288921	0.567911	0.962813	0.0239268	0.893988	0.537117	0.0696772	0.000514522	0.0533818	0.796697	0.71767	2.7	1.47	1.56	0.386	-0.0314	1.62	0.0897	-0.417	1.27	2.71	1.36	0.174	-0.244	EIF2B	OG5_127339	cytoplasm	Nucleus	57-75;131-144	FALSE	TRUE	FALSE	FALSE	FALSE	FALSE	FALSE	FALSE	FALSE	FALSE	cytoplasm	mRNA binding	formation of cytoplasmic translation initiation complex
Tb927.5.3610	Q57UA5	NA	adaptor complex protein (AP) 3 delta subunit 1, putative	0.628136	0.0197126	0.31411	0.654832	0.339147	0.021412	0.151276	0.16678	0.00138567	0.0482545	0.0405606	0.374085	0.606173	0.378	1.94	0.793	-0.349	0.752	-1.91	-1.14	1.1	2.82	1.61	1.68	-0.698	0.403	Tb927.5.3610	OG5_128382	ND	Cytoplasm	699-711;811-833	FALSE	FALSE	FALSE	FALSE	FALSE	FALSE	FALSE	FALSE	FALSE	FALSE	AP-3 adaptor complex	N/A	Golgi to vacuole transport
Tb927.5.3800	Q57U86	PYR1A-B	glutamine hydrolysing (not ammonia-dependent) carbomoyl phosphate synthase, putative	0.000234916	0.0287775	0.0160504	0.339344	0.726241	0.291856	0.790197	0.540224	0.00457928	5.53509e-05	0.00242641	0.457849	0.894967	2.71	1.44	1.61	-0.602	-0.219	0.666	0.166	0.384	1.95	3.08	2.12	-0.466	-0.0823	PYR1A-B	OG5_126835	cytoplasm	Cytoplasm	1778-1787	FALSE	TRUE	FALSE	FALSE	FALSE	FALSE	FALSE	FALSE	FALSE	FALSE	cytoplasm	N/A	glutamine metabolic process
Tb927.5.3810	Q57U85	PYR6-5	orotidine-5-phosphate decarboxylase/orotate phosphoribosyltransferase, putative	0.47401	0.0244225	0.003071	0.423959	0.814289	0.390849	0.371346	0.569757	0.00330674	0.00036042	0.000368901	0.0861235	0.026833	0.479	1.59	2.19	0.536	0.156	-0.575	0.6	-0.379	2.17	2.78	2.77	-1.18	-1.56	PYR6-5	OG5_126793	basal body, cytoplasm	Peroxisome	ND	FALSE	FALSE	FALSE	FALSE	FALSE	FALSE	FALSE	FALSE	FALSE	FALSE	ciliary basal body	orotate phosphoribosyltransferase activity	UMP biosynthetic process
Tb927.5.3850	Q57U81	XRNE	XRN 5'-3' exonuclease N-terminus, putative	4.71015e-05	0.000238229	0.00202558	0.344625	0.624482	2.45673e-08	0.384985	0.643343	5.99995e-05	0.207477	0.000512369	0.0364948	0.0132232	-2.17	1.88	1.5	0.414	0.213	-3.64	-0.38	-0.201	2.13	-0.557	1.75	-0.955	-1.16	XRNE	OG5_143914	nucleolus	Nucleus	783-839	FALSE	TRUE	FALSE	FALSE	FALSE	FALSE	FALSE	FALSE	FALSE	FALSE	nucleolus	5'-3' exoribonuclease activity	nuclear-transcribed mRNA catabolic process
Tb927.5.4120	Q57Z37	NA	LSU ribosomal protein, mitochondrial, putative	0.0118042	0.103502	0.0224193	0.17433	0.561047	0.72624	0.455922	0.0587892	0.000339898	2.68416e-05	5.42706e-05	0.173151	0.563699	1.54	0.95	1.37	-0.785	0.33	-0.198	0.424	1.12	2.37	2.96	2.8	-0.787	0.328	Tb927.5.4120	OG5_148906	mitochondrion	Mitochondrion	ND	FALSE	FALSE	FALSE	FALSE	FALSE	FALSE	FALSE	FALSE	FALSE	FALSE	cytoplasm	N/A	N/A
Tb927.5.4170	Q57Z31	NA	histone H4, putative	0.209045	0.0594054	0.848343	0.557887	0.269297	0.00082833	0.0864396	0.0980595	0.189362	0.24009	0.663521	0.201744	0.684139	-0.511	0.786	0.0764	-0.235	0.448	-1.53	-0.709	0.683	0.535	-0.477	-0.174	-0.52	0.163	Tb927.5.4170	OG5_126573	ND	Cytoplasm	ND	FALSE	FALSE	FALSE	FALSE	FALSE	FALSE	FALSE	FALSE	FALSE	FALSE	ciliary plasm	DNA binding	nucleosome assembly
Tb927.5.4480	Q57Z01	NA	paraflagellar rod component par4, putative	0.095264	0.819325	0.389351	0.387947	0.899099	0.0257634	0.524284	0.459682	0.725116	0.110363	0.326723	0.289523	0.742351	1.39	0.184	0.698	0.7	0.102	1.9	0.514	-0.598	0.283	1.32	0.797	0.863	0.265	Tb927.5.4480	OG5_144690	ND	Golgi_apparatus	32-51;240-249	FALSE	FALSE	FALSE	FALSE	FALSE	FALSE	FALSE	FALSE	FALSE	FALSE	N/A	N/A	N/A
Tb927.5.800	Q57W25	CK1.2	casein kinase I, isoform 2	0.0506689	0.161411	0.00711642	0.120414	0.927989	0.0359912	0.142444	0.141659	0.821984	0.050014	0.094301	0.701726	0.267879	-1.04	-0.727	-1.49	-0.811	-0.0459	-1.12	-0.764	0.765	-0.114	-1.04	-0.878	-0.195	0.57	CK1.2	OG5_126780	cytoplasm, basal body, cell tip(distal), flagellar cytoplasm, nuclear lumen	Cytoplasm	301-330	FALSE	FALSE	FALSE	FALSE	FALSE	FALSE	FALSE	FALSE	FALSE	FALSE	cell tip	ATP binding	endocytosis
Tb927.5.910	Q57W36	NA	oligosaccharyl transferase subunit, putative	0.00432517	0.13374	0.945231	0.000581979	0.00927197	0.0256178	0.118106	0.255044	5.81066e-05	0.000127692	0.00293875	0.0505607	0.377421	1.92	0.941	-0.042	-2.43	-1.72	-1.45	-0.983	0.706	3.01	2.81	2.02	-1.25	-0.544	Tb927.5.910	OG5_126840	ND	Cell_membrane	530-539	FALSE	FALSE	FALSE	FALSE	FALSE	FALSE	FALSE	FALSE	FALSE	FALSE	endoplasmic reticulum	N/A	N/A
Tb927.6.1340	Q585B3	PPIase	cyclophilin-type peptidyl-prolyl cis-trans isomerase, putative	0.00421034	0.000361137	0.00243322	0.447868	0.0990677	0.0862327	0.436872	0.0206689	0.000356775	0.0124036	0.00240441	0.768918	0.0388761	1.78	2.35	1.91	-0.429	0.957	-0.998	-0.44	1.39	2.35	1.51	1.91	-0.165	1.22	PPIase	OG5_tbru|Tb927.6.1340	ND	Cytoplasm	ND	FALSE	FALSE	FALSE	FALSE	FALSE	FALSE	FALSE	FALSE	FALSE	FALSE	cytoplasm	cyclosporin A binding	protein folding
Tb927.6.1470	Q585R3	NA	hypothetical protein, conserved	0.0215124	0.0300942	0.933666	0.0424976	0.476929	0.0306654	0.0251532	0.166451	0.172823	0.000734675	0.330351	0.837833	0.115657	1.03	0.961	-0.0349	0.893	0.3	0.958	-0.996	-0.593	0.584	1.63	-0.412	-0.0858	-0.679	Tb927.6.1470	OG5_148845	ND	Nucleus	1-188	FALSE	FALSE	FALSE	FALSE	FALSE	FALSE	FALSE	FALSE	FALSE	FALSE	nucleus	N/A	N/A
Tb927.6.1880	Q585M3	NA	aspartyl-tRNA synthetase, putative	0.0241695	0.0463556	0.390363	0.97965	0.711267	0.000158179	0.229459	0.692451	0.00222193	0.962529	0.0363062	0.306643	0.524968	-1.37	1.19	0.495	-0.0146	0.212	-2.57	-0.698	0.226	1.96	-0.0268	1.26	-0.591	-0.365	Tb927.6.1880	OG5_127227	cytoplasm(patchy), flagellar cytoplasm	Cytoplasm	12-60	FALSE	FALSE	FALSE	FALSE	FALSE	FALSE	FALSE	FALSE	FALSE	FALSE	aminoacyl-tRNA synthetase multienzyme complex	RNA binding	aspartyl-tRNA aminoacylation
Tb927.6.2050	Q584V1	RRS1	Ribosome biogenesis regulatory protein RRS1	0.839062	0.0415104	0.378038	0.437393	0.329038	0.254567	0.218548	0.0874908	0.00015425	5.31345e-07	0.00326444	0.00156848	2.10357e-05	0.122	1.29	0.535	0.47	-0.593	-0.696	-0.753	-1.06	2.72	4.17	1.97	-2.15	-3.21	RRS1	OG5_128225	nucleolus	Nucleus	75-85	FALSE	FALSE	FALSE	FALSE	FALSE	TRUE	FALSE	FALSE	FALSE	FALSE	nucleolus	5S rRNA binding	endonucleolytic cleavage in ITS1 to separate SSU-rRNA from 5.8S rRNA and LSU-rRNA from tricistronic rRNA transcript (SSU-rRNA, 5.8S rRNA, LSU-rRNA)
Tb927.6.2210	Q584T5	NA	hypothetical protein, conserved	0.636927	0.00598268	0.193722	0.444908	0.65069	0.000296276	0.102323	0.229228	0.000951404	0.127279	0.0460652	0.0508267	0.415359	-0.251	1.6	0.704	-0.408	0.241	-2.26	-0.895	0.649	2.01	0.832	1.11	-1.08	-0.436	Tb927.6.2210	OG5_141058	cytoplasm, flagellar cytoplasm, nuclear lumen	Cytoplasm	957-1022;1089-1127	FALSE	FALSE	FALSE	FALSE	FALSE	TRUE	FALSE	FALSE	FALSE	FALSE	cytoplasm	mRNA binding	N/A
Tb927.6.2640	Q583S0	KAP60	importin alpha subunit, putative	0.0437168	0.375678	0.369224	0.770359	0.427285	0.356675	0.99012	0.612824	0.0547185	0.00024374	0.0533628	0.172209	0.067431	1.83	0.772	0.783	-0.252	-0.691	0.804	0.0107	-0.438	1.73	3.74	1.74	-1.21	-1.64	KAP60	OG5_126761	nucleolus(strong), nucleoplasm	Cytoplasm	ND	FALSE	TRUE	FALSE	FALSE	FALSE	FALSE	FALSE	FALSE	FALSE	FALSE	nuclear pore	nuclear import signal receptor activity	NLS-bearing protein import into nucleus
Tb927.6.2780	Q583Q6	NA	U3 small nuclear ribonucleoprotein (snRNP), putative	0.0781187	0.0933389	0.511907	0.0119209	0.107964	0.00964236	0.0242668	0.000222597	0.000403709	3.85548e-05	0.0935243	0.0756136	0.0181555	0.941	0.893	-0.339	1.4	-0.853	1.44	-1.23	-2.25	2.13	2.62	0.893	0.95	-1.3	Tb927.6.2780	OG5_127912	ND	Nucleus	ND	FALSE	FALSE	FALSE	FALSE	FALSE	FALSE	FALSE	FALSE	FALSE	FALSE	Mpp10 complex	snoRNA binding	rRNA processing
Tb927.6.3150	Q583L9	NA	Hydin	1.93555e-05	0.000458445	0.000221479	0.0274713	0.836967	0.30571	0.766997	0.0175008	0.000290851	0.0125968	0.000140585	0.593349	0.00511755	2.9	2.2	2.36	-1.26	0.111	-0.558	0.16	1.37	2.3	1.45	2.46	0.289	1.66	Tb927.6.3150	OG5_128968	axoneme, cytoplasm(reticulated, points)	Cytoplasm	1126-1139;1952-1961;2931-2941	FALSE	FALSE	FALSE	FALSE	FALSE	FALSE	FALSE	FALSE	FALSE	FALSE	axoneme	N/A	N/A
Tb927.6.3500	Q584Z0	J59	endosomal trafficking protein RME-8, putative	0.00370568	0.00518062	0.0154124	0.782719	0.766976	0.89305	0.636631	0.568358	0.00115418	7.48177e-06	0.00361588	0.0358091	0.111494	1.72	1.65	1.39	-0.148	0.159	-0.072	-0.254	0.307	1.98	3.09	1.73	-1.18	-0.878	J59	OG5_129678	ND	Cytoplasm	ND	FALSE	TRUE	FALSE	FALSE	FALSE	FALSE	FALSE	FALSE	FALSE	FALSE	cytoplasm	N/A	endocytosis
Tb927.6.3650	Q585W3	ARL3C	ADP-ribosylation factor-like protein 3C, putative	0.00209096	0.0901709	0.103966	0.410405	0.133743	0.388062	0.939772	0.480104	0.00097091	2.40088e-06	0.0011672	0.114462	0.0275277	1.9	0.963	0.922	-0.456	-0.846	0.478	-0.0415	-0.39	2.07	3.44	2.03	-0.893	-1.28	ARL3C	OG5_148030	cytoplasm, nucleus, flagellar cytoplasm, basal body	Cytoplasm	ND	FALSE	FALSE	FALSE	FALSE	FALSE	FALSE	FALSE	FALSE	FALSE	FALSE	Golgi apparatus	GTP binding	cilium organization
Tb927.6.3680	Q585W6	POMP31	Present in the outer mitochondrial membrane proteome 31	0.001538	0.191457	0.1699	0.736952	0.223727	0.0159605	0.943744	0.125703	0.022102	6.5367e-06	0.0189221	0.419576	0.0246138	2.16	0.802	0.845	0.202	-0.745	1.56	0.0425	-0.948	1.47	3.51	1.51	-0.489	-1.44	POMP31	OG5_148867	mitochondrion	Endoplasmic_reticulum	ND	FALSE	FALSE	FALSE	FALSE	FALSE	FALSE	FALSE	FALSE	FALSE	FALSE	mitochondrial outer membrane	N/A	N/A
Tb927.6.3740	Q585X3	MtHSP70A	heat shock 70 kDa protein, mitochondrial precursor, putative	0.0203206	0.989221	0.48482	0.549611	0.956821	0.00498552	0.493162	0.585877	0.406141	0.980018	0.137009	0.0312226	0.0941391	-1.45	0.00792	0.412	-0.352	-0.0317	-1.81	0.404	0.32	0.491	0.0147	0.895	-1.33	-1.01	MtHSP70A	OG5_126744	ND	Mitochondrion	624-654	FALSE	TRUE	FALSE	FALSE	FALSE	FALSE	FALSE	FALSE	FALSE	FALSE	cytoplasm	ATP binding	cellular response to unfolded protein
Tb927.6.3790	Q585X7	NA	valosin-containing protein homolog, putative	0.000401291	0.0331162	0.0268761	0.624244	0.870876	0.0254495	0.922318	0.742747	0.000179348	8.17398e-07	0.000141244	0.928961	0.810863	2.31	1.26	1.31	0.275	0.091	1.33	0.0546	-0.184	2.5	3.77	2.55	0.0499	-0.134	Tb927.6.3790	OG5_147491	cytoplasm, nucleus(points)	Cytoplasm	25-35	FALSE	FALSE	FALSE	FALSE	FALSE	FALSE	FALSE	FALSE	FALSE	FALSE	ciliary plasm	ATP hydrolysis activity	N/A
Tb927.6.3930	Q585Z1	KRIT1	LSU ribosomal protein, mitochondrial, putative	0.00014702	0.0657267	0.00322232	0.143648	0.178448	0.267728	0.183685	0.900387	0.00662436	7.76737e-06	0.00024854	0.105836	0.133025	2.31	0.973	1.66	-0.762	-0.698	0.571	0.69	0.0636	1.51	2.93	2.2	-0.847	-0.784	KRIT1	OG5_151778	mitochondrion, kinetoplast	Mitochondrion	253-262	FALSE	FALSE	FALSE	FALSE	FALSE	FALSE	TRUE	FALSE	FALSE	FALSE	mitochondrial large ribosomal subunit	N/A	N/A
Tb927.6.4280	Q586Z6	GAPDH	glyceraldehyde 3-phosphate dehydrogenase, glycosomal	4.84441e-06	0.310941	0.000402564	0.429229	0.357405	0.00039149	0.00482052	0.894047	0.857964	0.000715822	0.00733238	0.946359	0.947436	-2.37	-0.408	-1.64	0.317	0.37	-1.65	-1.23	0.053	0.0712	-1.55	-1.16	-0.0267	0.0262	GAPDH	OG5_126628	cytoplasm(patchy, points), nucleolus(25%)	Peroxisome	ND	FALSE	FALSE	FALSE	FALSE	FALSE	FALSE	FALSE	FALSE	FALSE	FALSE	cytoplasm	glyceraldehyde-3-phosphate dehydrogenase (NAD+) (phosphorylating) activity	glycolytic process
Tb927.6.4370	Q587A3	EIF3D	eukaryotic translation initiation factor 3 subunit d	0.00332244	0.109783	0.0390551	0.438363	0.62318	0.409197	0.602154	0.773772	0.0127576	0.000276462	0.00377968	0.446115	0.632557	2.09	1.06	1.39	-0.501	-0.316	0.534	0.335	0.185	1.72	2.75	2.06	-0.492	-0.308	EIF3D	OG5_128265	ND	Nucleus	470-506	FALSE	TRUE	FALSE	FALSE	FALSE	FALSE	FALSE	FALSE	FALSE	FALSE	cytoplasm	mRNA binding	translational initiation
Tb927.6.4480	Q587B4	ValRS	valyl-tRNA synthetase, putative	0.981863	0.460894	0.0687172	0.117017	0.015402	0.39982	0.256737	0.329376	0.0602409	0.107163	0.00473857	0.258421	0.042256	-0.0222	0.724	1.85	1.58	2.54	0.829	1.12	0.963	1.91	1.62	3.04	1.12	2.08	ValRS	OG5_126723	axoneme, cytoplasm	Cytoplasm	462-471	FALSE	TRUE	FALSE	FALSE	FALSE	FALSE	FALSE	FALSE	FALSE	FALSE	ciliary plasm	valine-tRNA ligase activity	tRNA aminoacylation for protein translation
Tb927.6.4500	Q587B6	NA	conserved repeat domain containing protein, putative	0.00485757	0.128279	0.0506115	0.501376	0.839677	0.392924	0.630181	0.384028	0.00171482	8.5587e-05	0.000528405	0.716085	0.60832	1.85	0.933	1.22	-0.403	0.121	0.514	0.288	0.524	2.11	2.84	2.4	-0.217	0.307	Tb927.6.4500	OG5_144305	endoplasmic reticulum, nuclear envelope	Endoplasmic_reticulum	ND	FALSE	TRUE	FALSE	FALSE	FALSE	FALSE	FALSE	FALSE	FALSE	FALSE	endoplasmic reticulum	N/A	N/A
Tb927.6.4590	Q587C5	NA	glutamyl-tRNA synthetase, putative	0.30509	0.0105485	0.0282315	0.812219	0.884715	0.0594223	0.658536	0.702391	0.00048505	0.00663086	0.00143057	0.38245	0.619123	0.561	1.49	1.25	-0.128	0.0783	-1.06	-0.239	0.207	2.19	1.6	1.95	-0.476	-0.269	Tb927.6.4590	OG5_128638	cytoplasm(25%), cytoplasm(reticulated, points, 75%), flagellar cytoplasm(25%), nuclear lumen(25%)	Cytoplasm	546-604	FALSE	FALSE	FALSE	FALSE	FALSE	FALSE	FALSE	FALSE	FALSE	FALSE	ciliary plasm	glutamine-tRNA ligase activity	glutaminyl-tRNA aminoacylation
Tb927.6.4670	Q587D3	MORN1	MORN repeat-containing protein 1	0.00205812	0.0621408	0.170004	0.117908	0.00993189	0.925469	0.58965	0.000205746	0.147443	0.0079764	0.350157	0.144332	0.00766218	1.86	1.05	0.755	-0.866	1.5	-0.0503	-0.291	2.37	0.799	1.55	0.508	-0.806	1.56	MORN1	OG5_128972	ND	Extracellular	ND	FALSE	FALSE	FALSE	FALSE	FALSE	FALSE	FALSE	FALSE	FALSE	FALSE	bilobe structure	N/A	endocytosis
Tb927.6.4690	Q587D5	NA	60S ribosomal protein L9, putative	0.0533863	0.667422	0.0746052	0.584568	0.473599	0.0418937	0.164845	0.863221	0.830502	0.129549	0.112504	0.430455	0.338987	-1.08	-0.231	-0.991	-0.294	-0.386	-1.14	-0.761	-0.0922	-0.115	-0.834	-0.875	-0.425	-0.517	Tb927.6.4690	OG5_tbru|Tb927.6.4690	ND	Cytoplasm	ND	FALSE	FALSE	FALSE	FALSE	FALSE	FALSE	FALSE	FALSE	FALSE	FALSE	cytoplasm	structural constituent of ribosome	cytoplasmic translation
Tb927.6.4770	Q587E3	MKT1	protein mkt1, putative	0.972216	0.69221	0.406663	0.803529	0.725761	0.498586	0.660685	0.918517	0.00428643	0.00240757	0.0014909	0.361275	0.311557	-0.0247	0.281	0.593	-0.176	-0.249	-0.482	0.312	-0.0725	2.23	2.4	2.55	-0.653	-0.725	MKT1	OG5_146830	cytoplasm(points, 75%)	Cytoplasm	65-74	FALSE	TRUE	FALSE	FALSE	FALSE	FALSE	FALSE	FALSE	FALSE	FALSE	cytoplasm	5'-flap endonuclease activity	DNA repair
Tb927.6.4970	Q586G9	NA	serine/arginine-rich protein specific kinase SRPK, putative	0.146252	0.536551	0.139926	0.722325	0.742204	0.228597	0.375785	0.978838	0.143178	0.117808	0.0241994	0.271093	0.282326	1.43	0.595	1.45	0.341	0.316	1.17	0.856	-0.0254	1.44	1.54	2.3	1.07	1.04	Tb927.6.4970	OG5_127107	cytoplasm(patchy)	Nucleus	116-141	FALSE	FALSE	FALSE	FALSE	FALSE	FALSE	FALSE	FALSE	FALSE	FALSE	cytoplasm	ATP binding	intracellular signal transduction
Tb927.6.4980	Q4FKG9	RPS14	40S ribosomal protein S14	0.0773762	0.677423	0.0403313	0.894107	0.608835	0.0248795	0.0163719	0.520024	0.129202	0.348474	0.316494	0.0872008	0.267728	-0.683	0.155	-0.803	-0.0496	0.191	-0.888	-0.958	0.241	0.581	0.353	-0.378	-0.66	-0.419	RPS14	OG5_126681	cytoplasm(reticulated, patchy), nucleolus	Cytoplasm	134-143	FALSE	FALSE	FALSE	FALSE	FALSE	FALSE	FALSE	FALSE	FALSE	FALSE	cytoplasm	mRNA 5'-UTR binding	maturation of SSU-rRNA from tricistronic rRNA transcript (SSU-rRNA, 5.8S rRNA, LSU-rRNA)
Tb927.6.5070	Q586H9	CAP52	Cytoskeleton-associated protein 52 kDa	0.00377729	0.857697	0.759545	0.753051	0.39802	0.00273235	0.898926	0.250472	0.134934	1.07574e-05	0.107046	0.458724	0.0661306	2.43	0.136	0.232	0.238	-0.645	2.53	0.0961	-0.883	1.16	4.25	1.26	-0.564	-1.45	CAP52	OG5_150714	ND	Nucleus	ND	FALSE	FALSE	FALSE	FALSE	FALSE	FALSE	FALSE	FALSE	FALSE	TRUE	cortical cytoskeleton	N/A	mitotic cleavage furrow formation
Tb927.6.600	Q583U3	CAF1	CCR4-associated factor 1	0.674826	0.00903305	0.0337037	0.227023	0.92161	0.00132073	0.554477	0.265185	0.000301997	0.0212511	0.00128978	0.0745801	0.473467	0.21	1.41	1.12	-0.613	-0.0491	-1.82	-0.296	0.564	2.12	1.23	1.82	-0.924	-0.36	CAF1	OG5_127146	cytoplasm(points, 50%)	Nucleus	13-27	FALSE	TRUE	FALSE	FALSE	FALSE	FALSE	FALSE	FALSE	FALSE	FALSE	CCR4-NOT core complex	poly(A) binding	exonucleolytic catabolism of deadenylated mRNA
Tb927.7.1060	Q57VV2	FYRP	ISWI complex protein	0.534095	0.156257	0.170325	0.486915	0.780324	0.177645	0.960189	0.675085	0.0144799	0.0401663	0.0161942	0.368593	0.193123	-0.41	0.953	0.92	0.459	0.183	-0.904	-0.0328	-0.276	1.72	1.42	1.69	-0.596	-0.871	FYRP	OG5_148724	ND	Nucleus	177-186;195-205	FALSE	FALSE	FALSE	FALSE	FALSE	FALSE	FALSE	FALSE	FALSE	FALSE	ISWI-type complex	transcription cis-regulatory region binding	N/A
Tb927.7.1110	Q57WT9	NA	asparagine synthetase a, putative	0.555798	0.134234	0.0812952	0.895718	0.145479	0.287635	0.787761	0.114891	0.031789	0.000188804	0.0176791	0.00343417	0.115022	0.402	1.04	1.23	-0.0891	1.01	-0.732	0.183	1.1	1.54	3.02	1.72	-2.21	-1.1	Tb927.7.1110	OG5_129308	cytoplasm	Cytoplasm	ND	FALSE	TRUE	FALSE	FALSE	FALSE	FALSE	FALSE	FALSE	FALSE	FALSE	ciliary plasm	aspartate-ammonia ligase activity	asparagine biosynthetic process
Tb927.7.1740	Q57V35	NA	60S ribosomal protein L7, putative	0.00285206	0.0271153	0.0254361	0.216093	0.567054	0.0337226	0.976415	0.495707	0.00365618	0.00013496	0.00340754	0.379718	0.840416	1.66	1.17	1.18	0.629	0.287	1.12	0.0148	-0.342	1.61	2.28	1.62	0.442	0.101	Tb927.7.1740	OG5_126953	ND	Cytoplasm	25-44	FALSE	FALSE	FALSE	FALSE	FALSE	FALSE	FALSE	FALSE	FALSE	FALSE	cytoplasm	RNA binding	maturation of LSU-rRNA from tricistronic rRNA transcript (SSU-rRNA, 5.8S rRNA, LSU-rRNA)
Tb927.7.1920	Q57V18	PFC5	paraflagellar rod component, putative	0.00918711	0.0287412	0.042916	0.0718505	0.489371	0.0249064	0.849462	0.247164	0.0440744	0.00812154	0.0647737	0.116816	0.661338	2.22	1.82	1.67	1.47	0.546	1.87	-0.149	-0.923	1.66	2.26	1.51	1.27	0.345	PFC5	OG5_158354	paraflagellar rod, cytoplasm(weak)	Cytoplasm	ND	FALSE	FALSE	FALSE	FALSE	FALSE	FALSE	FALSE	FALSE	FALSE	FALSE	SCF ubiquitin ligase complex	N/A	SCF-dependent proteasomal ubiquitin-dependent protein catabolic process
Tb927.7.210	Q57U33	PRODH	Proline dehydrogenase, mitochondrial	0.0163495	0.0967186	0.132823	0.126542	0.775955	0.0225539	0.863113	0.206965	0.0442866	1.46596e-05	0.0628586	0.345061	0.0337968	1.61	1.07	0.965	0.982	0.178	1.52	-0.108	-0.804	1.32	3.43	1.21	-0.596	-1.4	PRODH	OG5_127738	mitochondrion	Mitochondrion	118-127	FALSE	TRUE	FALSE	FALSE	FALSE	TRUE	FALSE	FALSE	FALSE	FALSE	cytoplasm	FAD binding	age-dependent response to oxidative stress
Tb927.7.2170	Q57XQ7	NOP168	Nucleolar protein 168	0.0392968	0.00348725	0.00329371	0.584218	0.914631	0.602176	0.980899	0.659253	0.0013713	3.43279e-05	0.00129379	0.0519601	0.0203384	1.29	1.93	1.95	0.327	0.0639	-0.312	0.0143	-0.263	2.16	3.06	2.18	-1.21	-1.48	NOP168	OG5_147291	nucleolus, nucleoplasm(weak), nucleoplasm(point, strong, 25%)	Nucleus	168-178;190-201;340-349;787-796;894-1015;1256-1266;1429-1438	FALSE	FALSE	FALSE	FALSE	FALSE	FALSE	FALSE	FALSE	FALSE	FALSE	nucleolus	mRNA binding	N/A
Tb927.7.2340	Q57XN7	NA	40S ribosomal protein S15, putative	0.82518	0.00995025	0.785945	0.723522	0.450789	0.0354484	0.0183737	0.686122	0.0147361	0.0875674	0.921265	0.180969	0.341432	0.141	1.79	0.174	0.226	0.485	-1.42	-1.61	0.259	1.67	1.13	0.0632	-0.874	-0.615	Tb927.7.2340	OG5_126687	nucleolus, cytoplasm	Cytoplasm	ND	FALSE	FALSE	FALSE	FALSE	FALSE	FALSE	FALSE	FALSE	FALSE	FALSE	cytoplasm	structural constituent of ribosome	ribosomal small subunit assembly
Tb927.7.2390	Q57XN5	TAC102	Tripartite attachment complex protein 102	0.00708764	0.201281	0.378556	0.122193	0.76999	0.962737	0.679321	0.0701973	0.307711	0.0782593	0.538104	0.457525	0.263407	1.38	0.614	0.419	-0.749	0.138	0.022	-0.195	0.887	0.486	0.861	0.291	-0.352	0.535	TAC102	OG5_144886	mitochondrion	Nucleus	607-811	FALSE	FALSE	FALSE	FALSE	FALSE	FALSE	FALSE	FALSE	FALSE	FALSE	mitochondrial protein-containing complex	N/A	obsolete mitochondrial DNA inheritance
Tb927.7.2450	Q57XM9	NA	SUMO-interacting motif-containing protein	0.782954	0.0624001	0.552785	0.312345	0.740638	0.0126063	0.187251	0.184815	0.00235909	0.0381904	0.0494287	0.152093	0.909679	0.2	1.41	0.433	-0.743	0.241	-1.95	-0.979	0.984	2.47	1.59	1.5	-1.07	-0.0825	Tb927.7.2450	OG5_144673	ND	Nucleus	3-14;102-131	FALSE	FALSE	FALSE	FALSE	FALSE	FALSE	TRUE	FALSE	FALSE	FALSE	nuclear lumen	N/A	regulation of histone H3-K36 trimethylation
Tb927.7.2650	Q57XK9	CAP51V	Cytoskeleton associated protein 51V	0.0393117	0.108088	0.04663	0.985041	0.886355	0.597187	0.668501	0.901172	0.000118674	8.73723e-05	4.17678e-05	0.686195	0.598003	0.963	0.736	0.926	0.00832	0.0635	0.235	0.191	0.0551	2.05	2.11	2.25	0.18	0.235	CAP51V	OG5_139856	cytoplasm	Nucleus	225-248	TRUE	FALSE	FALSE	FALSE	FALSE	FALSE	FALSE	FALSE	FALSE	FALSE	ciliary plasm	N/A	cell morphogenesis
Tb927.7.270	Q57U27	RPF2	ribosome production factor 2	0.0279082	0.00173992	0.181249	0.404012	0.756419	4.58801e-05	0.0396326	0.256589	4.14456e-06	0.00211911	0.000768691	0.0221272	0.00150969	-1.21	1.83	0.707	0.436	-0.161	-2.6	-1.12	-0.597	3.12	1.79	2	-1.26	-1.86	RPF2	OG5_127909	ND	Nucleus	ND	FALSE	FALSE	FALSE	FALSE	FALSE	FALSE	FALSE	FALSE	FALSE	FALSE	nucleolus	5S rRNA binding	maturation of LSU-rRNA from tricistronic rRNA transcript (SSU-rRNA, 5.8S rRNA, LSU-rRNA)
Tb927.7.2820	Q57YA3	NA	histone H2A, putative	0.105263	0.221288	0.80462	0.478924	0.0571529	0.0364855	0.324119	0.211114	0.973117	0.046417	0.308414	0.881311	0.267723	-0.756	0.563	0.112	0.322	0.898	-0.997	-0.451	0.576	-0.0152	-0.945	-0.466	-0.0676	0.509	Tb927.7.2820	OG5_126570	nuclear lumen(points), cytoplasm(points)	Cytoplasm	ND	FALSE	FALSE	FALSE	FALSE	FALSE	FALSE	FALSE	FALSE	FALSE	FALSE	nucleoplasm	DNA binding	chromatin organization
Tb927.7.3180	Q57YC8	NA	adaptor complex AP-1 medium subunit, putative	0.293652	0.160516	0.222	0.852088	0.580446	0.852458	0.846613	0.713163	0.00279308	0.00500944	0.00442887	0.952458	0.669451	0.94	1.27	1.1	0.165	0.49	-0.164	-0.171	0.325	2.95	2.73	2.77	0.0527	0.378	Tb927.7.3180	OG5_127474	cytoplasm(points)	Cytoplasm	ND	FALSE	TRUE	FALSE	FALSE	FALSE	FALSE	FALSE	FALSE	FALSE	FALSE	cytoplasm	N/A	response to drug
Tb927.7.3330	Q57WE8	FAZ10	Flagellar attachment zone protein 10	0.320948	0.302167	0.757924	0.256979	0.250105	0.241026	0.184999	0.986187	0.0313663	0.743912	0.361314	0.167814	0.172864	1.18	1.23	-0.362	-1.35	-1.37	-1.4	-1.59	-0.0203	2.67	-0.384	1.08	1.65	1.63	FAZ10	OG5_126585	plasma membrane	Golgi_apparatus	728-749;3952-3961;4307-4318	FALSE	FALSE	FALSE	FALSE	FALSE	FALSE	FALSE	FALSE	FALSE	FALSE	cell tip	mRNA binding	cell morphogenesis
Tb927.7.3380	Q57WF3	NA	Ribosomal L28e protein family/Mak16 protein C-terminal region, putative	0.0177638	0.255938	0.0380187	0.24145	0.854182	0.0163577	0.308544	0.319744	0.00483331	1.32148e-05	0.000398539	0.889089	0.38997	1.71	0.778	1.47	0.803	0.124	1.74	0.695	-0.679	2.09	3.73	2.79	0.0941	-0.585	Tb927.7.3380	OG5_128004	nucleolus	Nucleus	150-172;184-231	FALSE	FALSE	FALSE	FALSE	FALSE	FALSE	FALSE	FALSE	FALSE	FALSE	nucleolus	N/A	maturation of 5.8S rRNA
Tb927.7.3430	Q57WF8	PPIase	cyclophilin-type peptidyl-prolyl cis-trans isomerase, putative	5.26574e-05	0.107265	0.00203298	0.395451	0.461561	0.000375961	0.0817554	0.90763	0.0363332	2.9095e-05	0.000539316	0.254744	0.304155	2.45	0.819	1.71	0.423	0.365	2.05	0.89	-0.0572	1.09	2.57	1.98	0.57	0.513	PPIase	OG5_141132	ND	Mitochondrion	ND	FALSE	FALSE	FALSE	FALSE	FALSE	FALSE	FALSE	FALSE	FALSE	FALSE	ciliary plasm	cyclosporin A binding	protein folding
Tb927.7.3550	Q57WH0	WCB	cytoskeleton associated protein, putative	0.120123	0.0756979	0.00675926	0.00761541	0.789115	0.00428901	0.271344	0.00406204	0.799177	0.00136652	0.393192	0.824805	0.00239264	0.794	0.915	1.47	-1.44	0.133	-1.57	0.554	1.58	-0.126	-1.8	0.427	0.11	1.69	WCB	OG5_142692	cortical cytoskeleton(anterior, middle, 50%)	Nucleus	367-376;591-610;649-690;821-961;983-1005	TRUE	FALSE	FALSE	FALSE	FALSE	FALSE	FALSE	FALSE	FALSE	FALSE	cortical cytoskeleton	protein-containing complex binding	cell morphogenesis
Tb927.7.3740	Q57WI9	NA	SUMO-interacting motif-containing protein	1.58318e-06	0.262443	0.0109967	0.776938	0.109853	1.15019e-05	0.11746	0.0637189	0.444393	0.000580512	0.0249377	0.024769	0.651161	3.8	0.67	1.62	0.167	-0.971	3.3	0.95	-1.14	0.454	2.35	1.4	1.41	0.267	Tb927.7.3740	OG5_148411	axoneme, cytoplasm(weak)	Cytoplasm	341-351	TRUE	FALSE	FALSE	FALSE	FALSE	FALSE	FALSE	FALSE	FALSE	FALSE	axoneme	N/A	posttranscriptional regulation of gene expression
Tb927.7.3920	Q57UM2	NA	hypothetical protein, conserved	0.0864432	0.274966	0.163891	0.241267	0.601305	0.0734997	0.751311	0.507093	0.0351607	0.0139212	0.017667	0.160761	0.445139	1.52	0.951	1.22	1.02	0.45	1.6	0.272	-0.573	1.91	2.27	2.18	1.23	0.66	Tb927.7.3920	OG5_154540	ND	Nucleus	142-151	FALSE	FALSE	FALSE	FALSE	FALSE	FALSE	FALSE	FALSE	FALSE	FALSE	axoneme	N/A	N/A
Tb927.7.4060	Q57UN6	NA	cysteine peptidase, Clan CA, family C2, putative	0.460947	0.309619	0.647238	0.0709203	0.101965	0.039668	0.570303	0.00159531	0.283959	0.149226	0.606734	0.689444	0.000601068	0.505	0.7	0.312	-1.28	1.15	-1.47	-0.388	2.43	0.739	-1.01	0.351	0.272	2.7	Tb927.7.4060	OG5_138263	cytoplasm(50%), flagellar cytoplasm(50%), nucleoplasm(50%), flagellar tip(50%)	Cytoplasm	ND	FALSE	FALSE	FALSE	FALSE	FALSE	FALSE	FALSE	FALSE	FALSE	FALSE	ciliary plasm	N/A	N/A
Tb927.7.4140	Q57UP4	MRPL21	mitochondrial ribosomal protein L21	0.000206942	0.150386	0.0275979	0.0241761	0.644908	0.596622	0.393251	0.00856313	0.0146954	3.70271e-05	0.00195281	0.0608433	0.370931	3.02	1.01	1.6	-1.64	0.317	0.364	0.591	1.96	1.8	3.5	2.39	-1.34	0.619	MRPL21	OG5_127445	mitochondrion, kinetoplast(strong)	Mitochondrion	ND	FALSE	FALSE	FALSE	FALSE	FALSE	FALSE	FALSE	FALSE	FALSE	FALSE	kinetoplast	structural constituent of ribosome	N/A
Tb927.7.4910	Q57XA7	NA	hypothetical protein, conserved	0.684108	0.459944	0.380616	0.0259198	0.669386	0.052508	0.887862	0.0631653	0.606883	0.23381	0.513194	0.191318	0.548365	0.561	1.02	1.22	3.25	0.589	2.79	0.194	-2.66	0.71	1.67	0.904	1.83	-0.829	Tb927.7.4910	OG5_148275	axoneme	Plastid	ND	FALSE	FALSE	FALSE	FALSE	FALSE	FALSE	FALSE	FALSE	FALSE	FALSE	axoneme	N/A	N/A
Tb927.7.5000	Q57ZI7	NA	60S ribosomal protein L19, putative	0.00441	0.881499	0.736836	0.442041	0.698439	0.0185493	0.851419	0.699983	0.0555534	0.000127275	0.0804643	0.934208	0.76179	-2.9	0.138	0.311	0.715	0.359	-2.32	0.173	-0.357	-1.85	-4.25	-1.67	0.0763	-0.28	Tb927.7.5000	OG5_126940	ND	Nucleus	96-108;135-260	FALSE	FALSE	FALSE	FALSE	FALSE	FALSE	FALSE	FALSE	FALSE	FALSE	cytoplasm	RNA binding	ribosome biogenesis
Tb927.7.5170	Q57ZH2	NA	60S ribosomal protein L25	1.24942e-07	0.287578	0.00362725	0.486886	0.516137	6.61433e-06	0.0411584	0.962754	0.727022	3.79352e-06	0.0194243	0.911478	0.87458	-5.32	-0.754	-2.26	0.489	0.457	-4.08	-1.5	-0.0327	-0.245	-4.25	-1.75	-0.0778	-0.11	Tb927.7.5170	OG5_126659	ND	Cytoplasm	1-53	FALSE	FALSE	FALSE	FALSE	FALSE	FALSE	FALSE	FALSE	FALSE	FALSE	cytoplasm	RNA binding	ribosomal large subunit assembly
Tb927.7.5340	Q57ZF5	CARP3	cAMP response protein 3	0.350836	0.492377	0.318478	0.366779	0.712807	0.017455	0.0997971	0.58871	0.00649365	0.978289	0.209857	0.685421	0.347931	-0.521	0.382	-0.558	-0.504	-0.204	-1.41	-0.94	0.3	1.65	0.0151	0.707	0.225	0.525	CARP3	OG5_161902	ND	Nucleus	84-95;291-300	TRUE	FALSE	FALSE	FALSE	FALSE	FALSE	FALSE	FALSE	FALSE	FALSE	ciliary membrane	N/A	N/A
Tb927.7.5760	Q582J1	MTR2	mRNA transport regulator MTR2, putative	0.000282092	0.1239	0.0819814	0.207286	0.314739	0.16883	0.825479	0.789151	0.104245	0.000224672	0.0682565	0.207673	0.315266	2.96	1.09	1.25	-0.889	-0.704	0.973	0.153	0.185	1.16	3.02	1.31	-0.888	-0.703	MTR2	OG5_130571	nuclear pore	Cytoplasm	ND	FALSE	FALSE	FALSE	FALSE	FALSE	FALSE	FALSE	FALSE	FALSE	FALSE	nuclear pore	protein binding	cell morphogenesis
Tb927.7.5930	Q582K8	PAD1	Protein Associated with Differentiation 1	0.000565144	0.0904473	0.134294	0.760553	0.662868	0.017437	0.830616	0.895127	0.00055287	1.60471e-06	0.000933137	0.91894	0.81539	2.06	0.903	0.793	0.157	0.225	1.31	-0.11	0.068	2.06	3.32	1.95	0.0525	0.12	PAD1	OG5_130630	ND	Cell_membrane	565-574	FALSE	FALSE	FALSE	FALSE	FALSE	FALSE	FALSE	FALSE	FALSE	FALSE	cell surface	N/A	citrate transport
Tb927.7.6360	Q582M3	H2AZ	histone H2A variant Z	0.149974	0.0725579	0.165074	0.0434216	0.693267	0.230067	0.65659	0.0950804	0.064665	0.436536	0.149126	0.936166	0.0815978	-0.873	1.1	0.84	1.25	0.234	-0.722	-0.264	-1.02	1.14	0.463	0.875	-0.0474	-1.07	H2AZ	OG5_127916	nucleoplasm	Nucleus	23-74	FALSE	FALSE	FALSE	FALSE	FALSE	FALSE	FALSE	FALSE	FALSE	FALSE	nucleoplasm	DNA binding	chromatin organization
Tb927.7.6860	B3GVE0	NA	expression site-associated gene 5 (ESAG5) protein, putative	7.01806e-05	2.07093e-05	0.00745498	0.00648193	0.328334	2.89802e-07	0.022424	0.0567665	8.91846e-05	0.0478534	0.0288432	0.000146377	1.31276e-06	-1.98	2.19	1.19	1.22	0.404	-2.95	-0.994	-0.814	1.94	0.848	0.947	-1.86	-2.67	Tb927.7.6860	OG5_185141	ND	Endoplasmic_reticulum	2-11	FALSE	FALSE	FALSE	FALSE	FALSE	FALSE	FALSE	FALSE	FALSE	FALSE	N/A	N/A	N/A
Tb927.7.710	Q57VR7	HSP70	heat shock 70 kDa protein, putative	0.0883336	0.100267	0.208677	0.762267	0.554193	0.81367	0.677827	0.771195	0.0911595	0.00917344	0.0396769	0.402147	0.581168	-0.856	-0.824	-0.622	0.147	0.288	0.114	0.202	0.141	0.848	1.37	1.05	-0.41	-0.269	HSP70	OG5_126588	cell tip(anterior), cytoplasm, flagellar cytoplasm	Cytoplasm	ND	FALSE	FALSE	FALSE	FALSE	FALSE	FALSE	FALSE	FALSE	FALSE	FALSE	axoneme	ATP binding	cellular response to unfolded protein
Tb927.7.7190	Q57XT9	NA	hypothetical protein, conserved	0.0153167	0.0265798	0.162798	0.815858	0.885338	0.629809	0.36019	0.706445	0.000360119	9.08369e-06	0.00340148	0.305907	0.166912	1.87	1.69	1.03	0.167	-0.104	0.347	-0.664	-0.271	3	4.09	2.34	-0.745	-1.02	Tb927.7.7190	OG5_160114	ND	Nucleus	39-58;200-211;231-242;300-309;374-386;710-732;870-883	FALSE	FALSE	FALSE	FALSE	FALSE	FALSE	FALSE	FALSE	FALSE	FALSE	cilium	N/A	posttranscriptional regulation of gene expression
Tb927.7.7410	Q57TX8	ENR2	Trans-2-enoyl-ACP reductase 2, putative	0.0360891	0.514386	0.139793	0.300355	0.786416	0.614648	0.393857	0.439974	0.0574891	0.000768774	0.00886406	0.177612	0.550302	1.71	0.508	1.18	-0.814	-0.21	0.392	0.667	0.603	1.54	3	2.21	-1.07	-0.465	ENR2	OG5_140252	ND	Mitochondrion	70-80	FALSE	FALSE	FALSE	FALSE	FALSE	FALSE	FALSE	FALSE	FALSE	FALSE	kinetoplast	trans-2-enoyl-CoA reductase (NADPH) activity	fatty acid metabolic process
Tb927.7.7450	Q57TY2	NA	GTP-binding protein, putative	0.358343	0.00392817	0.107626	0.343193	0.0233216	0.00365546	0.135844	0.155524	1.32476e-06	1.28575e-08	4.83946e-05	1.76519e-05	6.15914e-07	0.445	1.53	0.797	-0.46	-1.16	-1.55	-0.735	-0.698	3.13	4.19	2.4	-2.6	-3.3	Tb927.7.7450	OG5_127573	nucleolus	Nucleus	2-11	FALSE	FALSE	FALSE	FALSE	FALSE	FALSE	FALSE	FALSE	FALSE	FALSE	mitochondrion	N/A	N/A
Tb927.8.1160	Q57VN8	NA	vacuolar-type Ca2+-ATPase, putative	0.00148109	0.0559608	0.210526	0.973223	0.840751	0.127567	0.473601	0.86705	0.000406303	3.93613e-05	0.00235254	0.543244	0.658425	2.49	1.38	0.885	-0.0233	-0.139	1.09	-0.5	-0.116	2.86	3.53	2.36	0.424	0.307	Tb927.8.1160	OG5_126645	cytoplasm(points)	Cell_membrane	890-899	FALSE	FALSE	FALSE	FALSE	FALSE	FALSE	FALSE	FALSE	FALSE	FALSE	acidocalcisome	ATPase-coupled cation transmembrane transporter activity	cell growth
Tb927.8.1270	Q57VM8	NOP54	Nucleolar protein 54	0.0606271	0.883237	0.417151	0.696892	0.242817	0.165276	0.50459	0.428994	0.652626	0.092316	0.268781	0.896796	0.506957	-0.956	-0.0718	-0.4	0.191	0.58	-0.694	-0.328	0.389	-0.22	-0.851	-0.548	-0.0634	0.326	NOP54	OG5_145761	ND	Nucleus	382-391	FALSE	FALSE	FALSE	FALSE	FALSE	FALSE	FALSE	FALSE	FALSE	FALSE	nucleolus	N/A	N/A
Tb927.8.1300	Q57VM5	NA	hypothetical protein, conserved	3.52412e-06	0.00118558	0.00320434	0.956397	0.49064	0.0207173	0.680971	0.45749	0.000365982	1.53613e-06	0.00100316	0.862799	0.566814	3.3	2	1.77	0.0296	-0.375	1.34	-0.223	-0.405	2.26	3.5	2.03	0.0936	-0.311	Tb927.8.1300	OG5_166677	ND	Nucleus	204-223;490-543	FALSE	FALSE	FALSE	FALSE	FALSE	FALSE	FALSE	FALSE	FALSE	FALSE	ciliary pocket collar	N/A	N/A
Tb927.8.1330	Q57VM1	NA	60S ribosomal protein L7a, putative	0.000320514	0.96303	0.0796072	0.999068	0.592355	0.000286885	0.0727387	0.593154	0.502956	9.39293e-07	0.017694	0.0926084	0.0313563	2.04	-0.0224	0.879	-0.000564	-0.26	2.06	0.901	-0.259	0.325	3.23	1.23	-0.84	-1.1	Tb927.8.1330	OG5_126938	cytoplasm(patchy), nucleolus	Cytoplasm	27-37	FALSE	FALSE	FALSE	FALSE	FALSE	FALSE	FALSE	FALSE	FALSE	FALSE	cytoplasm	RNA binding	maturation of LSU-rRNA
Tb927.8.1410	Q580I2	NA	pre-rrna-processing protein tsr1 homolog	0.0439426	0.156706	0.186306	0.0314273	0.487886	0.00710151	0.919468	0.00657402	0.000171466	2.74225e-06	0.000219691	0.234898	0.0883427	1.31	0.898	0.836	1.41	-0.432	1.82	-0.0626	-1.84	2.77	3.85	2.71	0.748	-1.09	Tb927.8.1410	OG5_128208	ND	Nucleus	ND	FALSE	TRUE	FALSE	FALSE	FALSE	FALSE	FALSE	FALSE	FALSE	FALSE	cytoplasm	GTP binding	endonucleolytic cleavage of tricistronic rRNA transcript (SSU-rRNA, 5.8S rRNA, LSU-rRNA)
Tb927.8.1540	Q580G9	NA	hypothetical protein, conserved	0.705197	0.0024979	0.511037	0.363216	0.00769151	0.000674219	0.011766	0.000853835	3.66568e-05	0.650559	0.0244083	0.463419	0.000140001	0.17	1.51	0.296	-0.411	1.3	-1.76	-1.22	1.71	2.29	0.203	1.07	0.33	2.04	Tb927.8.1540	OG5_151456	ND	Cytoplasm	164-174;544-553;618-637	FALSE	FALSE	FALSE	FALSE	FALSE	FALSE	FALSE	FALSE	FALSE	FALSE	cilium	N/A	N/A
Tb927.8.1550	Q580G8	PFC3	paraflagellar rod component, putative	0.65987	0.82646	0.429579	0.064952	0.481095	0.016023	0.315805	0.232799	0.676395	0.0727407	0.161395	0.262952	0.938389	0.527	-0.262	0.95	2.3	0.846	3.08	1.21	-1.45	0.499	2.23	1.71	1.36	-0.0923	PFC3	OG5_151455	paraflagellar rod	Cytoplasm	610-619	FALSE	FALSE	FALSE	FALSE	FALSE	FALSE	FALSE	FALSE	FALSE	FALSE	cytoplasm	N/A	N/A
Tb927.8.2600	Q57XC9	NA	WD domain, G-beta repeat/BING4CT (NUC141) domain containing protein, putative	0.0424053	0.00346333	0.0664289	0.274445	0.642776	0.997523	0.191518	0.125954	0.000219996	3.69654e-05	0.00556261	0.465275	0.0292344	1.12	1.71	1.01	0.583	-0.245	-0.00163	-0.701	-0.828	2.3	2.69	1.6	-0.387	-1.21	Tb927.8.2600	OG5_127796	nucleolus	Nucleus	ND	FALSE	FALSE	FALSE	FALSE	FALSE	FALSE	FALSE	FALSE	FALSE	FALSE	nucleolus	N/A	maturation of SSU-rRNA from tricistronic rRNA transcript (SSU-rRNA, 5.8S rRNA, LSU-rRNA)
Tb927.8.2660	Q57XC3	NA	Galactose oxidase, central domain containing protein, putative	0.00185195	0.0538827	0.0502756	0.44463	0.945414	0.474633	0.972826	0.405778	0.00834912	0.000405268	0.00771589	0.59138	0.764804	2.58	1.49	1.51	-0.568	0.0505	0.53	0.0251	0.618	2.12	3.04	2.14	-0.397	0.221	Tb927.8.2660	OG5_180852	ND	Cytoplasm	156-165;225-244;865-874;918-931	FALSE	FALSE	FALSE	FALSE	FALSE	FALSE	FALSE	FALSE	FALSE	FALSE	N/A	N/A	N/A
Tb927.8.3060	Q57W67	NA	metallo-peptidase, Clan MF, Family M17	7.21755e-07	0.238995	0.897974	0.176753	0.759607	1.08775e-06	0.291528	0.289207	0.0171823	0.00268738	0.148122	0.477618	0.0843377	-3.45	0.607	0.065	0.7	0.155	-3.36	-0.542	-0.545	1.29	-1.7	0.752	-0.362	-0.907	Tb927.8.3060	OG5_127293	ND	Mitochondrion	594-668	FALSE	FALSE	FALSE	FALSE	FALSE	FALSE	FALSE	FALSE	FALSE	FALSE	cortical cytoskeleton	aminopeptidase activity	proteolysis
Tb927.8.3160	Q57YZ7	NA	hypothetical protein, conserved	0.261556	0.0396056	0.112272	0.300717	0.229803	0.981776	0.598401	0.862334	0.0145115	7.39675e-06	0.0454648	0.00450617	0.00677267	0.788	1.5	1.13	0.725	0.845	0.0158	-0.365	0.12	1.82	4	1.45	-2.17	-2.05	Tb927.8.3160	OG5_148649	ND	Mitochondrion	ND	FALSE	TRUE	FALSE	FALSE	FALSE	TRUE	FALSE	FALSE	FALSE	FALSE	kinetoplast	N/A	N/A
Tb927.8.3250	Q57YY8	NA	dynein heavy chain, putative	0.922399	0.0190262	0.0918073	0.41198	0.197183	0.00221681	0.44949	0.0415152	0.0172518	0.281563	0.0843888	0.832639	0.0265096	-0.0642	1.65	1.15	-0.545	0.866	-2.26	-0.501	1.41	1.68	-0.719	1.18	0.139	1.55	Tb927.8.3250	OG5_126558	axoneme	Cytoplasm	3411-3420;4379-4390	FALSE	FALSE	FALSE	FALSE	FALSE	TRUE	FALSE	FALSE	FALSE	FALSE	axoneme	dynein intermediate chain binding	microtubule-based movement
Tb927.8.3530	Q57YW0	G3PDH	glycerol-3-phosphate dehydrogenase [NAD+], glycosomal	0.201531	0.177284	0.390514	0.574324	0.616219	0.626995	0.609465	0.951293	0.00489978	0.00250085	0.0159424	0.837679	0.885624	0.804	0.851	0.535	0.348	0.31	0.301	-0.316	-0.0377	1.91	2.09	1.6	0.127	0.0889	G3PDH	OG5_126704	ND	Mitochondrion	250-259	FALSE	FALSE	FALSE	FALSE	FALSE	FALSE	FALSE	FALSE	FALSE	FALSE	cytosol	glycerol-3-phosphate dehydrogenase [NAD+] activity	NADH oxidation
Tb927.8.3720	Q580Z2	NA	SUMO-interacting motif-containing protein	0.294144	0.00576538	0.00573522	0.121102	0.542559	0.00161678	0.998216	0.330786	0.0039684	0.138746	0.00394739	0.0687322	0.367383	0.683	1.94	1.95	-1.02	-0.393	-2.29	0.00144	0.632	2.05	0.976	2.05	-1.22	-0.584	Tb927.8.3720	OG5_162362	cytoplasm(points, weak)	Cell_membrane	268-338	FALSE	FALSE	FALSE	FALSE	FALSE	FALSE	FALSE	FALSE	FALSE	FALSE	N/A	N/A	N/A
Tb927.8.3750	Q580Z5	NOP56	nucleolar protein 56	0.0124472	0.163388	0.483061	0.758871	0.458931	0.000872856	0.473717	0.298637	8.09471e-05	0.0241534	0.000472922	0.16363	0.0202049	-1.47	0.777	0.384	0.167	-0.406	-2.08	-0.393	-0.574	2.61	1.31	2.21	-0.777	-1.35	NOP56	OG5_127848	nucleolus(strong), nucleoplasm(points)	Nucleus	ND	FALSE	FALSE	FALSE	FALSE	FALSE	FALSE	FALSE	FALSE	FALSE	FALSE	Cajal body	snoRNA binding	mRNA splicing, via spliceosome
Tb927.8.4240	Q57W11	NA	hypothetical protein, conserved	0.241269	0.000391579	0.00135613	0.0201365	0.158233	8.12627e-08	0.612354	0.000665857	0.0168893	1.35999e-05	0.0501307	0.785736	0.000341791	-0.538	1.87	1.64	-1.12	0.653	-3.53	-0.23	1.77	1.16	-2.5	0.927	0.123	1.9	Tb927.8.4240	OG5_143834	kinetoplast(points)	Mitochondrion	1528-1598;1632-1652	FALSE	FALSE	FALSE	FALSE	FALSE	FALSE	TRUE	FALSE	FALSE	FALSE	ciliary basal body	N/A	N/A
Tb927.8.4290	Q57W06	NA	Ribosome biogenesis protein Nop16, putative	3.46598e-06	0.415827	0.920066	0.189366	0.946438	1.17081e-05	0.362063	0.211648	0.0046056	0.20084	0.0365539	0.253278	0.0223312	-3.6	0.484	-0.0592	0.79	0.0396	-3.29	-0.543	-0.75	1.84	-0.769	1.3	-0.684	-1.43	Tb927.8.4290	OG5_144532	nucleolus(strong)	Nucleus	87-98	FALSE	FALSE	FALSE	FALSE	FALSE	FALSE	FALSE	FALSE	FALSE	FALSE	nucleolus	N/A	ribosomal large subunit biogenesis
Tb927.8.4330	D6XLG8	RAB11	small GTP-binding protein Rab11	0.0594126	0.0155316	0.00353882	0.561369	0.860247	0.96285	0.525443	0.450748	0.00567226	0.00245957	0.00122982	0.69112	0.254425	1.14	1.51	1.88	0.339	-0.102	-0.027	0.37	-0.441	1.76	1.97	2.13	-0.231	-0.672	RAB11	OG5_126971	ND	Golgi_apparatus	ND	FALSE	TRUE	FALSE	FALSE	FALSE	FALSE	FALSE	FALSE	FALSE	FALSE	contractile vacuole	GTP binding	endocytosis
Tb927.8.4450	Q57VZ0	RBP11	RNA-binding protein, putative	2.50115e-05	0.924466	0.193623	0.348184	0.880488	0.00031698	0.226187	0.428562	0.968388	0.0830295	0.240979	0.0244456	0.00394723	-2.39	-0.0431	-0.602	0.431	0.0683	-1.92	-0.559	-0.362	0.018	-0.816	-0.541	-1.09	-1.45	RBP11	OG5_128388	nucleolus	Nucleus	55-68;98-135;350-359;360-373	FALSE	FALSE	FALSE	FALSE	FALSE	FALSE	FALSE	FALSE	FALSE	FALSE	nucleolus	RNA binding	RNA processing
Tb927.8.4580	Q57UZ3	BBP58	Basal body protein	0.420872	0.581946	0.201577	0.115628	0.979151	0.0707331	0.456519	0.121284	0.249505	0.0832587	0.0653263	0.218208	0.733727	0.635	0.433	1.02	1.27	0.0205	1.47	0.587	-1.25	0.916	1.41	1.5	0.982	-0.267	BBP58	OG5_130267	ND	Nucleus	145-176;337-347;363-382;418-430	FALSE	FALSE	FALSE	FALSE	FALSE	FALSE	FALSE	FALSE	FALSE	FALSE	axoneme	N/A	N/A
Tb927.8.4610	D6XLJ6	RABX1	Ras-related protein RabX1	0.00281859	0.249907	0.0648718	0.465736	0.810254	0.00786285	0.45383	0.335219	0.189209	0.000999735	0.045872	0.634276	0.619991	2.28	0.8	1.32	0.502	-0.164	1.98	0.516	-0.667	0.917	2.57	1.43	0.326	-0.34	RABX1	OG5_148351	ND	Cell_membrane	191-201	FALSE	FALSE	FALSE	FALSE	FALSE	FALSE	FALSE	FALSE	FALSE	FALSE	endoplasmic reticulum	GTP binding	protein secretion
Tb927.8.4780	Q57UX4	FLAM3	Flagellar Member 3	0.000177173	0.46291	0.0214964	0.760574	0.764043	0.00226579	0.097674	0.996357	0.124353	0.00129814	0.00308753	0.185962	0.184538	3.42	0.565	1.88	-0.233	-0.23	2.62	1.31	0.00349	1.21	2.79	2.52	1.03	1.04	FLAM3	OG5_145908	flagellum attachment zone, cytoplasm(reticulated, weak)	Cytoplasm	1547-1556;2207-2238;2774-2805;3341-3372;3710-3720;3992-4025	FALSE	FALSE	FALSE	FALSE	FALSE	FALSE	FALSE	FALSE	FALSE	FALSE	cilium	N/A	motile cilium assembly
Tb927.8.4810	Q57UX1	PHB1	prohibitin 1	0.0898896	0.0285097	0.0183945	0.0453726	0.791568	0.135086	0.84102	0.0259328	0.00283031	1.32351e-05	0.00174556	0.502748	0.00563876	0.951	1.26	1.37	1.14	-0.143	0.831	0.109	-1.28	1.8	3	1.91	-0.365	-1.65	PHB1	OG5_128051	mitochondrion	Mitochondrion	ND	FALSE	FALSE	FALSE	FALSE	FALSE	FALSE	FALSE	FALSE	FALSE	FALSE	mitochondrion	N/A	mitochondrion organization
Tb927.8.4970	Q57UH2	PFR2-1	Paraflagellar rod protein 2-1	0.289092	0.182332	0.936487	0.128054	0.929475	0.000552564	0.208211	0.149899	0.244607	0.468366	0.920358	0.0463884	0.541753	1.14	-1.45	-0.0848	1.66	0.0942	4.26	1.36	-1.57	-1.26	0.776	0.106	2.22	0.652	PFR2-1	OG5_130385	paraflagellar rod	Cytoplasm	ND	FALSE	FALSE	FALSE	FALSE	FALSE	FALSE	FALSE	FALSE	FALSE	FALSE	ciliary plasm	N/A	cilium-dependent cell motility
Tb927.8.5050	Q57UH7	NA	OTU-like cysteine protease, putative	0.194756	0.0687153	0.435498	0.567465	0.58838	0.0140107	0.0128965	0.975318	0.000270988	0.0628381	0.117408	0.772008	0.748523	-0.779	1.12	-0.463	0.338	0.32	-1.56	-1.58	-0.0182	2.53	1.14	0.949	-0.171	-0.189	Tb927.8.5050	OG5_135233	ND	Nucleus	546-565	FALSE	FALSE	FALSE	FALSE	FALSE	FALSE	FALSE	FALSE	FALSE	FALSE	ciliary plasm	thiol-dependent deubiquitinase	protein deubiquitination
Tb927.8.5440	Q57UL8	Tb-24	flagellar calcium-binding 24 kDa protein	0.90965	0.56943	0.243823	0.213371	0.894673	0.421588	0.541449	0.263441	0.097696	0.278772	0.278963	0.0556345	0.00448794	-0.0613	-0.309	-0.64	-0.685	-0.0715	-0.438	-0.331	0.613	0.924	-0.593	0.593	1.08	1.69	Tb-24	OG5_133600	ND	Cell_membrane	ND	FALSE	FALSE	FALSE	FALSE	FALSE	FALSE	FALSE	FALSE	FALSE	FALSE	ciliary plasm	calcium ion binding	N/A
Tb927.8.5490	Q57X33	NA	Nucleolar protein,Nop52, putative	0.00311454	0.709258	0.107214	0.658492	0.730454	0.00367646	0.206326	0.434011	0.438612	0.866781	0.0484028	0.0316791	0.0053661	-1.94	0.22	0.978	0.261	-0.203	-1.89	0.758	-0.464	0.459	-0.0988	1.22	-1.34	-1.8	Tb927.8.5490	OG5_142719	cytoplasm(reticulated)	Nucleus	123-142	FALSE	FALSE	FALSE	FALSE	FALSE	FALSE	FALSE	FALSE	FALSE	FALSE	cytoplasm	N/A	rRNA processing
Tb927.8.6060	Q57YK7	AKCT	2-amino-3-ketobutyrate coenzyme A ligase	0.380624	0.0103522	0.0175378	0.913291	0.0170741	0.0853813	0.815445	0.0217198	0.000515719	6.89247e-06	0.00091318	0.00159624	0.26943	0.643	2.02	1.85	0.0792	1.86	-1.3	-0.17	1.78	2.93	4.23	2.76	-2.59	-0.815	AKCT	OG5_126783	mitochondrion, kinetoplast(strong)	Mitochondrion	254-263	FALSE	FALSE	FALSE	FALSE	FALSE	FALSE	FALSE	FALSE	FALSE	FALSE	cytoplasm	glycine C-acetyltransferase activity	biosynthetic process
Tb927.8.6150	Q57YL6	NA	40S ribosomal protein S8, putative	0.425717	0.498065	0.143585	0.703736	0.902566	0.795318	0.416435	0.615752	0.567716	0.767789	0.173109	0.985293	0.602963	-0.367	-0.312	-0.687	0.174	-0.056	0.119	-0.375	-0.23	-0.263	-0.135	-0.637	-0.00844	-0.239	Tb927.8.6150	OG5_127039	ND	Cytoplasm	122-143	FALSE	FALSE	FALSE	FALSE	FALSE	FALSE	FALSE	FALSE	FALSE	FALSE	cytoplasm	structural constituent of ribosome	maturation of SSU-rRNA from tricistronic rRNA transcript (SSU-rRNA, 5.8S rRNA, LSU-rRNA)
Tb927.8.6180	Q57YL9	NA	60S ribosomal protein L26, putative	0.412821	0.476378	0.197899	0.707948	0.896208	0.790258	0.552366	0.614122	0.110508	0.0669322	0.0336906	0.598565	0.982068	0.971	0.843	1.55	-0.442	0.154	-0.313	0.702	0.595	1.94	2.24	2.64	-0.621	-0.0264	Tb927.8.6180	OG5_126931	cytoplasm(patchy)	Cytoplasm	ND	FALSE	FALSE	FALSE	FALSE	FALSE	FALSE	FALSE	FALSE	FALSE	FALSE	ciliary plasm	RNA binding	cytoplasmic translation
Tb927.8.6240	Q57YM5	SAXO1	STOP axonemal protein	0.12357	0.756933	0.292459	0.0400932	0.938937	0.00219896	0.452206	0.0469885	0.84785	0.175543	0.573623	0.07388	0.821601	1.45	0.284	0.977	1.98	0.0702	3.15	0.693	-1.91	-0.176	1.27	0.518	1.7	-0.207	SAXO1	OG5_134118	axoneme	Nucleus	198-207	FALSE	FALSE	FALSE	FALSE	FALSE	FALSE	FALSE	FALSE	FALSE	FALSE	axoneme	microtubule binding	microtubule anchoring
Tb927.8.6660	Q57TU7	PFC1	paraflagellar rod component, putative	0.0685056	0.0114529	0.927511	0.371047	0.904639	0.0926457	0.014074	0.312228	0.00260589	0.105583	0.472933	0.963095	0.334117	1.08	1.55	0.0517	-0.513	0.0681	-0.989	-1.5	0.582	1.91	0.949	0.411	-0.0263	0.555	PFC1	OG5_148678	paraflagellar rod	Nucleus	275-306	FALSE	FALSE	FALSE	FALSE	FALSE	FALSE	FALSE	FALSE	FALSE	FALSE	paraflagellar rod	N/A	N/A
Tb927.8.6970	Q57YQ4	NA	3-methylcrotonyl-CoA carboxylase alpha subunit, putative	0.0107051	0.134103	0.0170967	0.911074	0.853331	0.191098	0.315886	0.766971	0.014737	2.68362e-05	0.00134941	0.206738	0.123721	1.89	1.05	1.75	0.0764	-0.126	0.912	0.694	-0.203	1.79	3.58	2.49	-0.88	-1.08	Tb927.8.6970	OG5_126626	kinetoplast	Cytoplasm	ND	FALSE	FALSE	FALSE	FALSE	FALSE	FALSE	FALSE	FALSE	FALSE	FALSE	cilium	CoA carboxylase activity	pyrimidine nucleobase biosynthetic process
Tb927.8.7100	Q57YR7	ACC	acetyl-CoA carboxylase	0.00259867	0.0391718	0.154791	0.00183691	0.499593	0.0288689	0.478642	0.00916167	0.000134995	0.053946	0.000774188	0.805274	0.00515692	1.87	1.2	0.809	-1.95	-0.377	-1.28	-0.396	1.57	2.54	1.12	2.14	0.137	1.71	ACC	OG5_127493	cytoplasm(patchy, 50%), cytoplasm(weak, 50%)	Cytoplasm	1311-1321	FALSE	TRUE	FALSE	FALSE	FALSE	FALSE	FALSE	FALSE	FALSE	FALSE	biotin carboxylase complex	ATP binding	fatty acid biosynthetic process
Tb927.8.7240	Q57YV2	NA	hypothetical protein, conserved	0.0712793	0.205836	0.406472	0.686174	0.152508	0.327388	0.651747	0.29491	0.0400494	0.0095882	0.0984341	0.733474	0.170332	1.53	1.05	0.682	0.33	1.19	0.807	-0.369	0.864	1.76	2.29	1.39	0.278	1.14	Tb927.8.7240	OG5_138995	ND	Nucleus	263-292;343-374	FALSE	FALSE	FALSE	FALSE	FALSE	FALSE	FALSE	FALSE	FALSE	FALSE	cytoplasm	N/A	N/A
Tb927.8.730	Q57YF7	NA	nucleolar RNA-binding protein, putative	0.000726411	0.280927	0.561388	0.203328	0.916645	0.0011938	0.611085	0.170515	0.0520252	0.010866	0.138014	0.000203889	6.95474e-06	-3.42	0.96	0.512	1.14	-0.0919	-3.24	-0.448	-1.23	1.79	2.42	1.34	-3.87	-5.1	Tb927.8.730	OG5_142391	nucleolus(strong, 75%), nucleoplasm(weak, 75%)	Nucleus	101-240	FALSE	FALSE	FALSE	FALSE	FALSE	FALSE	FALSE	FALSE	FALSE	FALSE	nucleolus	RNA binding	RNA metabolic process
Tb927.8.760	Q57YF5	NOPP44/46-1	nucleolar RNA-binding protein	0.194386	0.119951	0.194568	0.412516	0.729932	0.583957	0.781967	0.24875	0.000143342	9.51329e-06	0.000282642	0.566755	0.0913237	0.819	0.99	0.819	0.511	-0.214	0.34	-0.171	-0.725	2.82	3.51	2.64	-0.356	-1.08	NOPP44/46-1	OG5_130876	ND	Nucleus	74-328	FALSE	FALSE	FALSE	FALSE	FALSE	FALSE	FALSE	FALSE	FALSE	FALSE	nucleolus	RNA binding	RNA metabolic process
Tb927.8.820	Q57YE9	NA	VID27 cytoplasmic protein, putative	0.000363807	0.00537612	0.0203423	0.375373	0.162738	0.0546932	0.561563	0.594674	0.00801188	2.43303e-05	0.0294931	0.69954	0.882977	2.39	1.75	1.42	0.513	0.818	1.15	-0.334	0.306	1.65	3.03	1.32	-0.222	0.0844	Tb927.8.820	OG5_130473	cytoplasm(patchy), flagellar pocket(ring), nuclear envelope	Cytoplasm	ND	FALSE	FALSE	FALSE	FALSE	FALSE	FALSE	FALSE	FALSE	FALSE	FALSE	ciliary pocket	N/A	N/A
Tb927.8.8330	Q57WJ7	CAP5.5V	calpain, putative	0.105989	0.651334	0.505411	0.0293036	0.235884	0.281171	0.828694	0.00181611	0.709787	0.22602	0.875868	0.815507	0.00318363	1.12	0.305	0.451	-1.56	0.813	-0.737	0.146	2.37	-0.251	-0.831	-0.105	-0.157	2.21	CAP5.5V	OG5_139833	pellicular membrane(50%)	Cell_membrane	1-83;778-862	FALSE	FALSE	TRUE	FALSE	FALSE	FALSE	FALSE	FALSE	FALSE	FALSE	cytoplasm	calcium-dependent cysteine-type endopeptidase activity	cell morphogenesis
Tb927.8.890	D6XMQ7	Rab1A	Ras-related protein Rab1A	0.000828617	0.549538	0.252918	0.989262	0.93588	0.00019635	0.0886945	0.946587	0.0945535	0.0514219	0.97313	0.514055	0.557578	-2.26	0.354	-0.685	0.00794	0.0475	-2.61	-1.04	0.0395	1.02	-1.2	-0.0199	-0.387	-0.347	Rab1A	OG5_127310	endocytic, cytoplasm(weak)	Golgi_apparatus	ND	FALSE	TRUE	FALSE	FALSE	FALSE	FALSE	FALSE	FALSE	FALSE	FALSE	ciliary pocket	GTPase activity	intracellular protein transport
Tb927.9.10100	Q38DZ4	SET28	SET domain protein 28	0.0601082	0.00244043	0.00610652	0.742559	0.542936	0.278055	0.699835	0.352185	0.000160813	2.11282e-07	0.000414595	0.000615743	6.17194e-05	0.91	1.57	1.39	0.153	-0.284	-0.511	-0.179	-0.436	2.09	3.42	1.91	-1.84	-2.27	SET28	OG5_133346	ND	Cytoplasm	ND	FALSE	FALSE	FALSE	FALSE	FALSE	FALSE	FALSE	FALSE	FALSE	FALSE	cytoplasm	N/A	N/A
Tb927.9.10310	Q38DX9	MCP11	mitochondrial carrier protein 11	0.59902	0.467863	0.576144	0.902292	0.748706	0.74492	0.865526	0.843159	0.207218	0.652336	0.271337	0.167712	0.232915	0.865	1.2	0.92	-0.201	-0.526	-0.534	-0.278	-0.325	2.11	-0.741	1.83	2.31	1.99	MCP11	OG5_127220	mitochondrion, kinetoplast(strong)	Mitochondrion	ND	FALSE	FALSE	FALSE	FALSE	FALSE	FALSE	FALSE	FALSE	FALSE	FALSE	cytoplasm	inorganic phosphate transmembrane transporter activity	cell morphogenesis
Tb927.9.10770	Q38DU2	PABP2	polyadenylate-binding protein 2	0.479014	0.517104	0.0738053	0.566488	0.660038	0.0628644	0.0189031	0.315246	0.0116609	0.146969	0.829709	0.485138	0.75362	-0.406	0.371	-1.06	-0.328	0.251	-1.1	-1.43	0.579	1.55	0.848	0.123	-0.4	0.179	PABP2	OG5_126795	rna granule	Cytoplasm	260-285;389-400;419-442	FALSE	TRUE	FALSE	FALSE	FALSE	FALSE	FALSE	FALSE	FALSE	FALSE	P-body	RNA binding	RNA processing
Tb927.9.10920	Q38DT1	KKT3	kinetoplastid kinetochore protein 3	0.160605	0.0038202	0.0465799	0.346528	0.798214	0.0118225	0.271371	0.235175	0.000322956	0.0168017	0.00482413	0.295773	0.882403	0.784	1.75	1.14	-0.519	0.14	-1.48	-0.609	0.659	2.3	1.4	1.69	-0.578	0.0808	KKT3	OG5_151836	nucleoplasm(points)	Nucleus	429-473	FALSE	FALSE	FALSE	FALSE	FALSE	FALSE	FALSE	FALSE	FALSE	FALSE	kinetochore	ATP binding	cell population proliferation
Tb927.9.11000	Q3S1K6	NA	NA	0.00231825	0.0135258	0.0017696	0.197974	0.291953	0.0485921	0.391129	0.806513	0.000478801	1.47018e-06	5.7688e-05	0.721646	0.548941	2.2	1.71	2.27	0.846	0.688	1.33	0.557	-0.158	2.61	4.17	3.17	-0.23	-0.388	Tb927.9.11000	OG5_127616	cytoplasm(50%), flagellar cytoplasm(50%), nucleoplasm(50%), cytoplasm(50%, reticulated, weak)	Golgi_apparatus	185-194	FALSE	TRUE	FALSE	FALSE	FALSE	FALSE	FALSE	FALSE	TRUE	TRUE	ciliary plasm	GTPase activity	small GTPase mediated signal transduction
Tb927.9.11270	Q38DP9	TCP-1-eta	t- complex protein 1 (eta subunit), putative	0.00534713	0.0501961	0.479235	0.75506	0.216084	1.73512e-05	0.0106839	0.126288	0.00109839	0.859496	0.343369	0.137136	0.963397	-1.71	1.14	-0.397	-0.174	0.702	-3.02	-1.54	0.876	2.07	-0.0987	0.534	-0.851	0.0256	TCP-1-eta	OG5_127782	cytoplasm(patchy)	Cytoplasm	401-410;532-542	FALSE	TRUE	FALSE	FALSE	FALSE	FALSE	FALSE	FALSE	FALSE	FALSE	chaperonin-containing T-complex	unfolded protein binding	protein folding
Tb927.9.11380	Q38DP2	NA	60S ribosomal protein L23, putative	0.00013651	0.000441141	5.3007e-05	0.663543	0.599191	0.966134	0.390354	0.340594	0.00538261	0.877612	0.000666804	0.00698874	0.000691394	-1.92	-1.72	-2.08	0.183	-0.222	-0.0178	-0.364	-0.405	-1.28	-0.0647	-1.65	-1.24	-1.64	Tb927.9.11380	OG5_126678	cytoplasm(points), nucleolus	Cytoplasm	ND	FALSE	FALSE	FALSE	FALSE	FALSE	FALSE	FALSE	FALSE	FALSE	FALSE	cytoplasm	large ribosomal subunit rRNA binding	translation
Tb927.9.11470	O15883	NA	60S ribosomal protein L29	0.0900623	0.460727	0.00120246	0.535949	0.384185	0.697113	0.00708508	0.14369	0.212832	0.434598	0.105311	0.926688	0.168676	-1.08	-0.456	-2.26	0.382	-0.54	-0.24	-1.81	-0.922	0.78	0.484	-1.03	0.0566	-0.865	Tb927.9.11470	OG5_127016	ND	Cytoplasm	ND	FALSE	FALSE	FALSE	FALSE	FALSE	FALSE	FALSE	FALSE	FALSE	FALSE	cytosolic large ribosomal subunit	RNA binding	translation
Tb927.9.11580	Q9N9C9	NA	NA	0.0223889	0.030282	0.297616	0.160807	0.674321	0.125584	0.224238	0.0739047	0.000174191	7.65718e-06	0.0035381	0.780594	0.124968	1.54	1.45	0.668	0.909	-0.267	0.997	-0.783	-1.18	2.83	3.65	2.05	0.177	-0.999	Tb927.9.11580	OG5_139863	ND	Peroxisome	ND	FALSE	TRUE	FALSE	FALSE	FALSE	FALSE	FALSE	FALSE	FALSE	FALSE	glycosome	N/A	N/A
Tb927.9.12110	Q38DI7	gnD	6-phosphogluconate dehydrogenase, decarboxylating	0.0529419	0.130967	0.153214	0.891636	0.895909	0.544632	0.929474	0.789548	0.0158398	0.00340716	0.0192854	0.956748	0.748233	1.64	1.26	1.19	0.111	-0.106	0.494	-0.0718	-0.217	2.1	2.64	2.03	-0.044	-0.261	gnD	OG5_127175	ND	Cytoplasm	5-14	FALSE	FALSE	FALSE	FALSE	FALSE	FALSE	FALSE	FALSE	FALSE	FALSE	ciliary plasm	NADP binding	D-gluconate catabolic process
Tb927.9.12200	Q38DH8	NA	60S ribosomal subunit protein L31, putative	0.00508002	0.694468	0.298067	0.522473	0.667622	0.00280989	0.511098	0.289671	0.11438	1.85713e-05	0.0306077	0.662935	0.141159	1.54	0.196	0.526	0.321	-0.215	1.66	0.33	-0.535	0.811	2.69	1.14	-0.218	-0.753	Tb927.9.12200	OG5_126907	ND	Nucleus	ND	FALSE	FALSE	FALSE	FALSE	FALSE	FALSE	FALSE	FALSE	FALSE	FALSE	cytosolic large ribosomal subunit	structural constituent of ribosome	cytoplasmic translation
Tb927.9.12570	Q9NJP9	NA	NA	1.41769e-06	0.708042	0.0551169	0.978267	0.369893	6.50079e-07	0.0250839	0.384206	0.0833403	0.000437838	0.560381	0.344356	0.938112	-3.65	0.211	-1.13	0.0153	0.509	-3.85	-1.34	0.493	1.01	-2.3	-0.329	-0.537	-0.0436	Tb927.9.12570	OG5_126746	ND	Peroxisome	ND	FALSE	FALSE	FALSE	FALSE	FALSE	FALSE	FALSE	FALSE	FALSE	FALSE	glycosome	ATP binding	glycerol metabolic process
Tb927.9.12650	Q38DE8	UBA1b	ubiquitin-activating enzyme E1, putative	0.097484	0.0195585	0.0165249	0.228818	0.468736	0.0550325	0.93948	0.621471	2.18666e-05	0.000132415	1.82323e-05	0.215157	0.446148	0.795	1.16	1.19	-0.568	-0.338	-0.93	0.0352	0.23	2.47	2.13	2.51	-0.586	-0.356	UBA1b	OG5_145106	cell tip(posterior), cytoplasm, flagellar cytoplasm	Mitochondrion	92-101;441-450;1012-1021	FALSE	FALSE	FALSE	FALSE	FALSE	FALSE	FALSE	FALSE	FALSE	FALSE	cell tip	ubiquitin activating enzyme activity	cellular protein modification process
Tb927.9.12890	Q38DC6	NA	hypothetical protein, conserved	0.679512	0.13464	0.884616	0.0215515	0.342329	0.193577	0.173522	0.002333	0.488339	0.00953094	0.489928	0.433778	0.000341445	0.186	0.691	0.0653	1.1	-0.432	0.597	-0.626	-1.53	0.313	1.26	-0.312	-0.355	-1.89	Tb927.9.12890	OG5_149005	ND	Nucleus	ND	FALSE	FALSE	FALSE	FALSE	FALSE	FALSE	FALSE	FALSE	FALSE	FALSE	nucleolus	N/A	N/A
Tb927.9.13280	Q38D96	DRBD9	Double RNA binding domain protein 9	0.0270151	0.927337	0.889866	0.156325	0.753141	0.426032	0.818428	0.0879325	0.418109	0.484137	0.301789	0.49279	0.021198	-1.08	-0.0419	0.0636	0.667	-0.145	-0.368	0.106	-0.812	0.375	0.323	0.48	-0.317	-1.13	DRBD9	OG5_128354	nucleolus, nucleoplasm(weak)	Nucleus	ND	FALSE	FALSE	FALSE	FALSE	FALSE	FALSE	FALSE	FALSE	FALSE	FALSE	nucleolus	RNA binding	RNA processing
Tb927.9.13340	Q38D90	NA	Nop53 (60S ribosomal biogenesis), putative	1.83749e-06	0.0336305	0.716306	0.00651608	0.723982	1.00958e-05	0.070788	0.0146638	0.00203482	0.1583	0.12296	0.00136645	2.48434e-06	-3.54	1.24	0.202	1.65	0.196	-3.14	-1.04	-1.46	1.92	0.802	0.881	-2.01	-3.47	Tb927.9.13340	OG5_129039	ND	Nucleus	117-178	FALSE	FALSE	FALSE	FALSE	FALSE	FALSE	TRUE	FALSE	FALSE	FALSE	mitochondrion	5S rRNA binding	rRNA processing
Tb927.9.13350	Q38D89	NA	hypothetical protein, conserved	1.20963e-05	0.0102925	0.213006	0.272509	0.783698	2.74421e-07	0.141178	0.405699	0.000131394	0.869686	0.00514182	0.0197428	0.00283793	-3.38	1.68	0.768	0.674	0.166	-4.38	-0.914	-0.508	2.78	-0.0994	1.86	-1.51	-2.01	Tb927.9.13350	OG5_148998	ND	Nucleus	37-46	FALSE	FALSE	FALSE	FALSE	FALSE	FALSE	FALSE	FALSE	FALSE	FALSE	nucleolus	phosphate ion binding	N/A
Tb927.9.13650	Q38D65	ARF1	ADP-ribosylation factor, putative	0.841853	0.216244	0.184184	0.0973098	0.210964	0.799344	0.922843	0.661481	0.00487542	0.000106267	0.00387622	0.195775	0.0893117	-0.154	0.973	1.05	1.32	0.985	0.197	0.0748	-0.339	2.39	3.61	2.47	-1.02	-1.36	ARF1	OG5_126696	ND	Golgi_apparatus	ND	FALSE	TRUE	FALSE	FALSE	FALSE	FALSE	FALSE	FALSE	FALSE	FALSE	cytoplasm	GTP binding	intracellular protein transport
Tb927.9.13820	Q38D58	KMP11-3	kinetoplastid membrane protein 11-3	0.525941	0.511749	0.283024	0.962317	0.360846	0.944615	0.668718	0.337276	0.627337	0.935501	0.364509	0.73689	0.200086	0.248	0.257	0.424	-0.0184	0.359	-0.0271	0.167	0.378	0.19	0.0315	0.357	0.131	0.509	KMP11-3	OG5_135220	basal body, flagellum attachment zone, axoneme, nucleus(points), cytoplasm	Cytoplasm	ND	FALSE	FALSE	FALSE	FALSE	FALSE	FALSE	FALSE	FALSE	FALSE	FALSE	axoneme	protein binding	ciliary basal body organization
Tb927.9.14430	Q38D21	CK2A1	Casein kinase II	0.0222378	0.112467	0.361322	0.226175	0.31223	0.0522496	0.478098	0.834826	0.0109314	4.39022e-05	0.0514279	0.799295	0.644144	1.99	1.34	0.755	1.01	0.838	1.66	-0.584	-0.171	2.25	4.13	1.67	-0.208	-0.379	CK2A1	OG5_126901	cell tip(anterior, 50%), endocytic, nucleolus(50%), cytoplasm(50%), cytoplasm(reticulated, 50%), flagellar cytoplasm(50%)	Cytoplasm	71-80	FALSE	FALSE	FALSE	FALSE	FALSE	FALSE	FALSE	FALSE	FALSE	FALSE	cell tip	ATP binding	peptidyl-serine phosphorylation
Tb927.9.15050	Q38CZ5	DRC4	nexin-dynein regulatory complex 4	0.0220327	0.323977	0.0409814	0.653029	0.738108	0.068995	0.257054	0.435501	0.779271	0.278271	0.161981	0.289774	0.774087	2.81	1.15	2.47	0.519	-0.385	2.18	1.32	-0.904	0.323	1.27	1.65	1.23	0.331	DRC4	OG5_129322	ND	Cytoplasm	2-26	FALSE	FALSE	FALSE	FALSE	FALSE	FALSE	FALSE	FALSE	FALSE	FALSE	Golgi apparatus	microtubule binding	cellular protein localization
Tb927.9.15060	Q38CZ4	NA	rRNA processing protein, putative	3.87626e-05	0.217201	0.896736	0.248746	0.134546	3.15902e-05	0.174985	0.0120662	0.0245755	0.947193	0.321785	0.0118049	1.71904e-05	-2.77	0.683	-0.0706	0.637	-0.836	-2.81	-0.754	-1.47	1.3	-0.036	0.545	-1.48	-2.95	Tb927.9.15060	OG5_128088	nucleolus	Nucleus	ND	FALSE	FALSE	FALSE	FALSE	FALSE	FALSE	FALSE	FALSE	FALSE	FALSE	nuclear periphery	N/A	rRNA processing
Tb927.9.15170	Q38CY8	L5	60S ribosomal protein L5, putative	0.31297	0.31371	0.0258993	0.74713	0.945599	0.0964245	0.00247424	0.799196	0.0157446	0.192431	0.430791	0.648101	0.479002	-0.607	0.606	-1.41	0.192	0.0406	-1.02	-2.01	-0.151	1.54	0.79	-0.472	-0.272	-0.423	L5	OG5_127090	ND	Cytoplasm	285-299	FALSE	FALSE	FALSE	FALSE	FALSE	FALSE	FALSE	FALSE	FALSE	FALSE	cytoplasm	5S rRNA binding	ribosomal large subunit assembly
Tb927.9.1520	Q38FZ4	NA	hypothetical protein, conserved	0.000118914	0.0555385	0.0169891	0.511089	0.789904	0.00311842	0.579554	0.358633	0.0150033	3.1192e-05	0.00414497	0.473426	0.836965	2.87	1.24	1.58	0.409	-0.165	2.04	0.345	-0.575	1.62	3.21	1.96	0.447	-0.128	Tb927.9.1520	OG5_154741	cytoplasm, flagellar cytoplasm, nuclear lumen	Nucleus	ND	FALSE	FALSE	FALSE	FALSE	FALSE	FALSE	FALSE	FALSE	FALSE	FALSE	ciliary plasm	N/A	N/A
Tb927.9.15210	Q38CY6	NA	ribosomal protein L36, putative	0.0220509	0.368294	0.330961	0.158563	0.538065	0.0674529	0.0690212	0.048985	0.0645775	0.849751	0.973165	0.832577	0.074776	-1.39	0.516	-0.559	0.82	-0.352	-1.08	-1.07	-1.17	1.09	-0.108	0.0191	0.12	-1.05	Tb927.9.15210	OG5_127134	cytoplasm(patchy), nucleolus	Cytoplasm	ND	FALSE	FALSE	FALSE	FALSE	FALSE	FALSE	FALSE	FALSE	FALSE	FALSE	cytoplasm	structural constituent of ribosome	cytoplasmic translation
Tb927.9.15360	Q38CX3	NA	40S ribosomal protein S6, putative	0.0177426	0.324788	0.658459	0.0637099	0.838418	0.119798	0.159807	0.0946557	0.0999437	0.0688437	0.7951	0.0566317	0.792846	-2.88	1.13	-0.504	2.2	0.232	-1.82	-1.64	-1.96	1.93	-2.15	0.295	2.26	0.299	Tb927.9.15360	OG5_126964	cytoplasm(patchy)	Cytoplasm	217-230	FALSE	FALSE	FALSE	FALSE	FALSE	FALSE	FALSE	FALSE	FALSE	FALSE	cytoplasm	mRNA binding	regulation of cell growth
Tb927.9.15420	Q38CW9	NA	60S ribosomal protein L32	0.664152	0.0503952	0.349027	0.625124	0.148113	0.0450316	0.277181	0.0587326	0.0528114	0.10604	0.360632	0.0916131	0.820159	-0.548	-2.58	-1.19	0.617	-1.87	2.65	1.39	-2.48	-2.55	-2.1	-1.16	2.2	-0.286	Tb927.9.15420	OG5_126965	ND	Cytoplasm	ND	FALSE	FALSE	FALSE	FALSE	FALSE	FALSE	FALSE	FALSE	FALSE	FALSE	cytosolic large ribosomal subunit	structural constituent of ribosome	translation
Tb927.9.15450	Q38CW8	NA	Domain of unknown function (DUF4205), putative	0.033663	0.327124	0.23538	0.103397	0.297566	0.667986	0.829504	0.533391	0.061291	0.0410801	0.039449	0.53327	0.999851	2.43	1.07	1.31	-1.82	-1.14	-0.466	0.234	0.679	2.12	2.33	2.35	-0.679	-0.000202	Tb927.9.15450	OG5_131030	ND	Nucleus	115-137;165-196	FALSE	FALSE	FALSE	FALSE	FALSE	FALSE	FALSE	FALSE	FALSE	FALSE	ciliary basal body	N/A	N/A
Tb927.9.15460	Q38CW7	NA	calcium motive p-type ATPase, putative	0.0886443	0.931875	0.740979	0.776994	0.355014	0.172874	0.677682	0.517252	7.96397e-05	1.70096e-05	0.000220554	0.453829	0.917794	1.01	0.049	-0.19	-0.162	-0.535	0.798	-0.239	-0.373	2.75	3.11	2.51	0.432	0.0591	Tb927.9.15460	OG5_128979	ND	Cell_membrane	1020-1039	FALSE	FALSE	FALSE	FALSE	FALSE	FALSE	FALSE	FALSE	FALSE	FALSE	integral component of membrane	ATP binding	cation transport
Tb927.9.1560	Q38FZ1	J73	DnaJ domain containing protein, putative	0.000546997	0.25818	0.0335452	0.193815	0.194946	0.000844903	0.279807	0.997213	0.030834	0.372682	0.00250387	0.521697	0.519463	-2.43	0.696	1.36	0.803	0.801	-2.32	0.664	-0.00212	1.38	-0.545	2.05	-0.39	-0.392	J73	OG5_144160	ND	Nucleus	306-329;398-407;435-464	FALSE	FALSE	FALSE	FALSE	FALSE	FALSE	FALSE	FALSE	FALSE	FALSE	cytoplasm	N/A	N/A
Tb927.9.1600	Q38FY7	TZP182	hypothetical protein, conserved	0.174895	0.268347	0.310792	0.290977	0.620187	0.00154312	0.922661	0.127422	0.763853	0.00659662	0.691294	0.367523	0.513172	-1.3	1.05	0.959	-1	0.465	-3.35	-0.0908	1.47	-0.281	-2.78	-0.372	-0.851	0.615	TZP182	OG5_148036	ND	Cytoplasm	1238-1248	FALSE	FALSE	FALSE	FALSE	FALSE	FALSE	FALSE	FALSE	FALSE	FALSE	ciliary pocket	protein serine/threonine kinase activity	actomyosin structure organization
Tb927.9.1750	Q38FX4	NA	Fibronectin type III domain containing protein, putative	2.15187e-06	0.0252458	0.0135466	0.101321	0.00241711	5.8853e-10	4.42381e-05	3.902e-05	0.000126138	7.04255e-06	0.667629	0.980838	3.68196e-05	-3.05	1.15	-1.28	-0.818	1.64	-5.02	-2.43	2.46	2.23	-2.81	-0.208	0.0116	2.47	Tb927.9.1750	OG5_148751	flagellum, cytoplasm(points)	Cytoplasm	682-692;1568-1578;1618-1628;2146-2161;2679-2688;3869-3934;4061-4090;4435-4444	TRUE	FALSE	FALSE	FALSE	FALSE	FALSE	FALSE	FALSE	FALSE	FALSE	axoneme	cytokine binding	cytokine-mediated signaling pathway
Tb927.9.2120	Q38FU7	NA	hypothetical protein, conserved	0.194484	0.84481	0.0292185	0.0227004	0.794499	0.000634019	0.0190701	0.0127042	0.223417	0.000229579	0.00103629	0.41321	0.0732699	0.853	-0.126	1.49	1.56	-0.168	2.54	1.61	-1.73	0.799	2.81	2.41	0.532	-1.2	Tb927.9.2120	OG5_148743	ND	Nucleus	ND	FALSE	FALSE	FALSE	FALSE	FALSE	FALSE	FALSE	FALSE	TRUE	FALSE	nucleolus	N/A	N/A
Tb927.9.2470	Q38FS0	NOP86	nucleolar protein	0.370413	0.558229	0.00278623	0.167148	0.349616	0.27943	0.0110588	0.026257	0.902541	0.205168	0.014594	0.942488	0.0224438	0.814	0.529	3	-1.27	0.851	-0.987	2.47	2.12	-0.11	-1.16	2.36	0.065	2.19	NOP86	OG5_140922	ND	Cytoplasm	ND	FALSE	FALSE	FALSE	FALSE	FALSE	FALSE	FALSE	FALSE	FALSE	FALSE	cytoplasm	N/A	G2/M transition of mitotic cell cycle
Tb927.9.2490	Q38FR8	NOP66	nucleolar protein	0.0885294	0.535716	0.91616	0.282709	0.279398	0.00199144	0.606405	0.0379078	0.243675	0.297154	0.506391	0.225465	0.345977	-1.72	0.608	0.103	-1.06	1.07	-3.39	-0.505	2.14	1.16	-1.03	0.653	-1.21	0.931	NOP66	OG5_140922	ND	Cytoplasm	ND	FALSE	FALSE	FALSE	FALSE	FALSE	FALSE	FALSE	FALSE	FALSE	FALSE	cytoplasm	N/A	N/A
Tb927.9.2520	Q38FR6	GB4	microtubule-associated protein	0.0014443	0.807592	0.0390577	0.00630552	0.134234	1.97065e-06	0.064227	0.156304	0.081359	0.000166385	0.00105795	0.00123886	0.0354052	1.93	0.13	1.16	1.6	0.822	3.4	1.03	-0.776	0.966	2.4	2	1.96	1.19	GB4	OG5_142233	ND	Cytoplasm	ND	FALSE	FALSE	FALSE	FALSE	FALSE	FALSE	FALSE	FALSE	FALSE	FALSE	cell tip	N/A	N/A
Tb927.9.2590	Q38FR1	NA	hypothetical protein, conserved	0.00114942	0.0198083	0.0903519	0.245934	0.856559	0.97224	0.465308	0.183037	0.000560422	3.89014e-05	0.0033295	0.296693	0.76239	2.8	1.88	1.33	-0.893	0.137	0.0263	-0.556	1.03	3.02	3.85	2.47	-0.8	0.229	Tb927.9.2590	OG5_143123	ND	Cytoplasm	ND	FALSE	TRUE	FALSE	FALSE	FALSE	FALSE	FALSE	FALSE	FALSE	FALSE	cytoplasm	nuclear export signal receptor activity	protein export from nucleus
Tb927.9.2900	Q38FN3	UTP10	U3 small nucleolar RNA-associated protein 10, putative	0.0314256	0.0306498	0.0102855	0.936547	0.39815	0.945865	0.623472	0.44301	8.15938e-05	6.06148e-07	2.4773e-05	0.0525305	0.217595	1.08	1.08	1.32	0.0377	0.403	0.0321	0.233	0.366	2.26	3.26	2.5	-0.96	-0.594	UTP10	OG5_141917	nucleolus, nucleoplasm(weak)	Cytoplasm	721-730;945-954;2120-2131;2152-2162	FALSE	FALSE	FALSE	FALSE	FALSE	FALSE	FALSE	FALSE	FALSE	FALSE	90S preribosome	snoRNA binding	maturation of SSU-rRNA from tricistronic rRNA transcript (SSU-rRNA, 5.8S rRNA, LSU-rRNA)
Tb927.9.3130	Q38FL2	NA	hypothetical protein, conserved	0.133925	0.123821	0.531079	0.6535	0.611903	0.00157124	0.0358634	0.342759	0.00615996	0.273388	0.434172	0.591395	0.144267	-1.02	1.05	-0.416	-0.297	0.336	-2.36	-1.46	0.634	1.98	-0.734	0.521	0.356	0.99	Tb927.9.3130	OG5_145975	ND	Nucleus	2-124;488-566	FALSE	FALSE	FALSE	FALSE	FALSE	FALSE	FALSE	FALSE	FALSE	FALSE	cilium	N/A	N/A
Tb927.9.3280	Q38FJ8	PPX1	exopolyphosphatase	7.82638e-05	0.0458469	0.00653482	0.676885	0.533174	0.00462191	0.382992	0.834954	0.00293636	8.53025e-06	0.000344801	0.478535	0.361603	2.24	0.979	1.39	0.195	0.293	1.46	0.411	0.0974	1.55	2.67	1.96	0.333	0.431	PPX1	OG5_129543	ND	Cytoplasm	276-285	FALSE	FALSE	FALSE	FALSE	FALSE	FALSE	FALSE	FALSE	FALSE	FALSE	ciliary plasm	exopolyphosphatase activity	polyphosphate catabolic process
Tb927.9.3990	Q38FD9	NA	ribosomal protein S7, putative	0.478402	0.119248	0.280688	0.601774	0.709711	0.714106	0.611267	0.880263	0.914794	0.355603	0.687653	0.50307	0.602455	-0.296	-0.665	-0.454	-0.217	-0.155	0.152	0.211	0.0625	-0.0444	0.387	0.167	-0.279	-0.217	Tb927.9.3990	OG5_127368	ND	Cytoplasm	ND	FALSE	FALSE	FALSE	FALSE	FALSE	FALSE	FALSE	FALSE	FALSE	FALSE	cytoplasm	structural constituent of ribosome	rRNA processing
Tb927.9.4080	Q38FD1	HYP2	Stumpy formation signalling pathway protein, putative	0.0132637	0.0111222	0.00250411	0.810698	0.697444	0.751341	0.52748	0.531151	0.0036529	3.25558e-05	0.000787104	0.0326471	0.114157	1.74	1.79	2.21	-0.157	0.255	-0.207	0.415	0.411	2.11	3.37	2.52	-1.48	-1.06	HYP2	OG5_143832	cytoplasm(points)	Nucleus	157-255;762-771;917-926;1025-1034	FALSE	TRUE	TRUE	FALSE	FALSE	FALSE	FALSE	FALSE	FALSE	FALSE	cytoplasm	mRNA binding	7-methylguanosine mRNA capping
Tb927.9.4680	Q38F76	EIF4A1	Eukaryotic initiation factor 4A-1	6.14352e-08	0.000506632	8.08783e-07	0.899282	0.866935	0.00050543	0.0119806	0.967284	0.361514	0.00630573	0.00135531	0.0591973	0.0545015	-2.92	-1.48	-2.48	-0.0465	-0.0616	-1.48	-0.997	-0.0151	-0.339	-1.1	-1.34	-0.724	-0.739	EIF4A1	OG5_126984	cytoplasm(patchy)	Cytoplasm	355-366	FALSE	TRUE	FALSE	FALSE	FALSE	FALSE	FALSE	FALSE	FALSE	FALSE	cytoplasm	ATP binding	cytoplasmic translational initiation
Tb927.9.5100	Q38F42	PDEB2	cAMP-specific phosphodiesterase	0.00435329	0.815905	0.187687	0.245734	0.891628	0.093397	0.272997	0.197046	0.409045	0.0213582	0.0621724	0.90903	0.16234	1.77	0.131	0.758	-0.665	0.0768	0.978	0.627	0.742	0.469	1.38	1.1	0.0644	0.806	PDEB2	OG5_127318	paraflagellar rod, cytoplasm	Cytoplasm	ND	FALSE	FALSE	FALSE	FALSE	FALSE	FALSE	FALSE	FALSE	TRUE	FALSE	axoneme	3',5'-cyclic-nucleotide phosphodiesterase activity	signal transduction
Tb927.9.5150	Q38F38	SNU13	13 kDa ribonucleoprotein-associated protein, putative	6.63016e-05	0.00522471	0.0481366	0.116556	0.924063	0.00230864	0.323174	0.138454	0.00184684	2.15362e-05	0.0189998	0.123128	0.947978	2.91	1.83	1.24	0.966	0.057	2.04	-0.597	-0.909	2.1	3.19	1.5	0.948	0.039	SNU13	OG5_127322	ND	Cytoplasm	ND	FALSE	FALSE	FALSE	FALSE	FALSE	FALSE	FALSE	FALSE	FALSE	FALSE	U4/U6 x U5 tri-snRNP complex	RNA binding	mRNA splicing, via spliceosome
Tb927.9.5190	Q38F34	PCNA	proliferating cell nuclear antigen	0.001173	0.0199443	0.0271746	0.767065	0.80485	0.366413	0.887251	0.960705	0.00816204	0.000102669	0.0113045	0.374391	0.400746	2.71	1.83	1.72	-0.218	-0.182	0.67	-0.104	0.0362	2.12	3.45	2.01	-0.659	-0.623	PCNA	OG5_127352	ND	Cytoplasm	ND	FALSE	FALSE	FALSE	FALSE	FALSE	FALSE	FALSE	FALSE	FALSE	FALSE	PCNA complex	DNA polymerase processivity factor activity	DNA replication
Tb927.9.5320	Q38F23	NA	nucleolar RNA binding protein, putative	0.314894	0.00608662	0.000441595	0.48873	0.72368	0.00284556	0.283537	0.299714	0.000444314	0.00343729	3.13094e-05	0.0199901	0.00172637	-0.582	1.72	2.34	0.399	-0.203	-1.9	0.623	-0.601	2.34	1.86	2.96	-1.42	-2.02	Tb927.9.5320	OG5_127592	nucleolus, nucleus(points)	Nucleus	ND	FALSE	FALSE	FALSE	FALSE	FALSE	FALSE	FALSE	FALSE	FALSE	FALSE	nucleolus	mRNA binding	mRNA splicing, via spliceosome
Tb927.9.5410	Q38F14	NA	hypothetical protein, conserved	0.306856	0.592184	0.296455	0.143867	0.830219	0.0560117	0.604124	0.207457	0.0286057	0.00197123	0.00896106	0.406933	0.654566	0.959	0.498	0.981	1.39	0.199	1.85	0.482	-1.19	2.15	3.23	2.63	0.775	-0.416	Tb927.9.5410	OG5_148423	axoneme	Cytoplasm	262-273	FALSE	FALSE	FALSE	FALSE	FALSE	FALSE	FALSE	FALSE	FALSE	FALSE	axoneme	N/A	N/A
Tb927.9.5590	Q38EZ6	TOP2	DNA topoisomerase ii	0.000107492	0.0920162	0.00322575	0.93553	0.431062	0.00882706	0.136034	0.386303	0.0119628	6.24726e-06	0.000305089	0.766644	0.565469	3.18	1.19	2.23	-0.0551	0.54	1.94	1.04	0.595	1.85	3.99	2.89	-0.202	0.393	TOP2	OG5_128755	ND	Cytoplasm	1160-1203	FALSE	FALSE	FALSE	FALSE	FALSE	FALSE	FALSE	FALSE	FALSE	FALSE	kinetoplast	DNA topoisomerase type II (double strand cut, ATP-hydrolyzing) activity	DNA topological change
Tb927.9.5860	Q71SQ4	TRYP1	tryparedoxin peroxidase	0.807269	0.04802	0.0535958	0.324373	0.218357	0.00293554	0.000444159	0.0330958	0.55183	0.00181405	0.00190671	0.428565	0.00550746	0.178	-1.51	1.47	0.728	-0.915	2.42	2.99	-1.64	-0.436	2.56	2.55	-0.582	-2.22	TRYP1	OG5_126593	ND	Cytoplasm	ND	FALSE	FALSE	FALSE	FALSE	FALSE	FALSE	FALSE	FALSE	TRUE	TRUE	cilium	thioredoxin peroxidase activity	cell redox homeostasis
Tb927.9.5900	Q38EX6	GDH	glutamate dehydrogenase	0.281961	0.0251155	0.0683154	0.104096	0.884933	0.0837285	0.630737	0.0790536	0.00180377	0.000113643	0.00569747	0.00737035	8.9246e-05	-0.673	1.47	1.17	1.04	-0.0893	-1.11	-0.298	-1.12	2.17	2.87	1.87	-1.8	-2.93	GDH	OG5_130284	kinetoplast, mitochondrion	Mitochondrion	ND	FALSE	TRUE	FALSE	FALSE	FALSE	FALSE	FALSE	FALSE	FALSE	FALSE	cytoplasm	glutamate dehydrogenase (NAD+) activity	cellular amino acid metabolic process
Tb927.9.6290	Q38EU9	AK1	arginine kinase	0.210211	0.403956	0.767126	0.982126	0.810481	0.0457283	0.262241	0.793199	0.00566023	0.0843639	0.0681235	0.400453	0.27369	-0.919	0.606	-0.213	0.0161	-0.173	-1.51	-0.819	-0.189	2.19	1.29	1.37	-0.61	-0.799	AK1	OG5_128330	cytoplasm, flagellar cytoplasm	Cytoplasm	37-46	FALSE	FALSE	FALSE	FALSE	FALSE	FALSE	FALSE	FALSE	FALSE	FALSE	ciliary plasm	ATP binding	N/A
Tb927.9.6370	Q38EU4	NA	MFS transporter, putative	0.00597358	0.0451703	0.00523265	0.000165379	0.381003	1.81394e-05	0.338351	0.00143848	0.0151825	1.12126e-05	0.00156229	0.0237382	0.236345	1.55	1.08	1.58	2.31	0.455	2.78	0.498	-1.86	1.34	2.89	1.84	1.24	-0.62	Tb927.9.6370	OG5_133806	ND	Cell_membrane	ND	FALSE	FALSE	FALSE	FALSE	FALSE	FALSE	FALSE	FALSE	FALSE	FALSE	transport vesicle	N/A	response to drug
Tb927.9.6560	Q38ES8	NA	NAK family pseudokinase, putative	0.0676215	0.248692	0.512762	0.758076	0.409626	0.0106003	0.608371	0.602246	0.0340417	0.948975	0.0955602	0.64313	0.953477	-0.952	0.586	0.329	0.154	0.416	-1.38	-0.257	0.262	1.12	-0.032	0.862	-0.232	0.0292	Tb927.9.6560	OG5_140422	cytoplasm, endocytic, flagellar cytoplasm, cell tip(posterior)	Nucleus	2-14;53-66;546-566;587-702;705-718	FALSE	TRUE	FALSE	FALSE	FALSE	FALSE	FALSE	FALSE	FALSE	FALSE	cell tip	ATP binding	protein phosphorylation
Tb927.9.7020	Q38EP0	NA	hypothetical protein, conserved	0.977776	0.00286086	0.0542084	0.546755	0.217843	0.000705303	0.198511	0.518121	0.0001264	0.0112601	0.00309154	0.0515204	0.0126738	0.013	1.55	0.939	-0.282	-0.585	-1.82	-0.612	-0.303	2.15	1.28	1.54	-0.95	-1.25	Tb927.9.7020	OG5_148240	ND	Mitochondrion	33-66	FALSE	FALSE	FALSE	FALSE	FALSE	FALSE	FALSE	FALSE	FALSE	FALSE	mitochondrion	N/A	N/A
Tb927.9.7110	Q38EN1	NA	GRAM domain containing protein, putative	0.00283539	0.0502817	0.0011215	0.299687	0.451624	0.0279961	0.107153	0.0811943	0.0404108	6.99039e-05	0.000866226	0.718093	0.0392048	1.97	1.21	2.2	0.623	-0.449	1.38	0.985	-1.07	1.28	2.87	2.26	-0.214	-1.29	Tb927.9.7110	OG5_tbru|Tb09.160.5200	endocytic, cytoplasm	Cytoplasm	58-67	FALSE	TRUE	FALSE	FALSE	FALSE	FALSE	FALSE	FALSE	TRUE	FALSE	cytoplasm	N/A	posttranscriptional regulation of gene expression
Tb927.9.7170	Q38EM7	MRPL47	Mitochondrial ribosomal protein L47	0.0151623	0.0130117	0.0692971	0.596252	0.949738	0.643735	0.435298	0.640277	0.00165451	3.72501e-05	0.0106055	0.282216	0.129353	1.61	1.65	1.17	0.329	0.039	0.287	-0.486	-0.29	2.2	3.16	1.71	-0.674	-0.964	MRPL47	OG5_149408	kinetoplast(75%), mitochondrion(75%)	Mitochondrion	122-135;259-269	FALSE	FALSE	FALSE	FALSE	FALSE	FALSE	FALSE	FALSE	FALSE	FALSE	ciliary plasm	structural constituent of ribosome	mitochondrial translation
Tb927.9.7250	Q38EM0	NA	hypothetical protein, conserved	0.00086418	0.121595	0.0795224	0.452194	0.413203	0.00642644	0.821266	0.124115	0.00401237	1.82296e-06	0.00233723	0.823039	0.0816366	2.41	1.01	1.15	0.478	-0.521	1.88	0.143	-1	2.01	4.04	2.15	-0.141	-1.14	Tb927.9.7250	OG5_151434	cytoplasm(reticulated)	Nucleus	ND	FALSE	FALSE	FALSE	FALSE	FALSE	FALSE	FALSE	FALSE	FALSE	FALSE	cytoplasm	N/A	N/A
Tb927.9.7590	Q38EI9	L11	60S ribosomal protein L11, putative	0.295622	0.205124	0.395875	0.727697	0.800082	0.907074	0.664149	0.548791	0.223953	0.466477	0.425782	0.536096	0.984516	-0.958	-1.17	-0.774	-0.315	0.229	-0.106	0.393	0.544	-1.12	-0.662	-0.725	-0.562	-0.0175	L11	OG5_126688	ND	Cytoplasm	ND	FALSE	FALSE	FALSE	FALSE	FALSE	FALSE	FALSE	FALSE	FALSE	FALSE	cytoplasm	RNA binding	rRNA processing
Tb927.9.7670	Q38EI6	NA	hypothetical protein, conserved	2.33589e-06	0.00269367	5.55143e-05	0.703748	0.707802	0.00294844	0.121946	0.452459	0.729781	0.114406	0.221151	0.189571	0.561755	-2.87	-1.53	-2.25	-0.174	0.171	-1.51	-0.726	0.345	0.158	-0.742	-0.568	-0.611	-0.266	Tb927.9.7670	OG5_148244	nucleolus	Nucleus	163-172	FALSE	FALSE	FALSE	FALSE	FALSE	FALSE	FALSE	FALSE	FALSE	FALSE	nucleolus	N/A	N/A
Tb927.9.8070	Q38EC5	QM	QM-like protein	0.00154868	0.00239363	0.00198911	0.381674	0.976215	0.294045	0.938762	0.366096	0.0101395	0.209201	0.00849677	0.0165432	0.108334	-1.51	-1.43	-1.46	-0.372	0.0125	-0.447	-0.0323	0.384	-1.17	-0.538	-1.2	-1.08	-0.697	QM	OG5_126951	cytoplasm(patchy)	Cytoplasm	ND	FALSE	FALSE	FALSE	FALSE	FALSE	FALSE	FALSE	FALSE	FALSE	FALSE	cytoplasm	structural constituent of ribosome	ribosomal large subunit assembly
Tb927.9.8200	Q38EE3	NA	Pescadillo N-terminus/BRCA1 C Terminus (BRCT) domain containing protein, putative	0.081504	0.953267	0.565314	0.886173	0.990085	0.0957801	0.605175	0.876375	0.0013241	0.00145161	0.000372658	0.102835	0.0764297	-0.904	0.0293	0.289	0.0717	-0.00622	-0.862	0.26	-0.0779	1.82	1.8	2.08	-0.843	-0.921	Tb927.9.8200	OG5_128009	nucleolus	Nucleus	455-465;626-645	FALSE	FALSE	FALSE	FALSE	FALSE	FALSE	FALSE	FALSE	FALSE	FALSE	PeBoW complex	RNA binding	maturation of LSU-rRNA from tricistronic rRNA transcript (SSU-rRNA, 5.8S rRNA, LSU-rRNA)
Tb927.9.8290	Q38ED8	MRPL30	mitochondrial ribosomal protein l30	0.0620701	0.192409	0.526387	0.208033	0.816399	0.506406	0.490452	0.299618	0.0964818	0.0089223	0.311573	0.0839909	0.462146	1.36	0.932	0.446	-0.899	-0.163	-0.468	-0.486	0.736	1.2	1.99	0.718	-1.25	-0.518	MRPL30	OG5_153700	kinetoplast, mitochondrion	Mitochondrion	ND	FALSE	FALSE	FALSE	FALSE	FALSE	FALSE	TRUE	FALSE	FALSE	FALSE	cytoplasm	N/A	N/A
Tb927.9.8720	Q38EA4	FBPase	fructose-1,6-bisphosphatase	0.00466638	0.283716	0.978612	0.695787	0.646263	0.000874569	0.272323	0.945485	0.040774	0.378698	0.305545	0.442338	0.483202	-2.1	0.732	-0.0181	0.264	0.31	-2.57	-0.75	0.0461	1.45	-0.599	0.699	-0.521	-0.475	FBPase	OG5_127400	cytoplasm(patchy)	Peroxisome	ND	FALSE	FALSE	FALSE	FALSE	FALSE	FALSE	FALSE	FALSE	FALSE	FALSE	cytoplasm	fructose 1,6-bisphosphate 1-phosphatase activity	carbohydrate metabolic process
Tb927.9.8850	Q38E94	NA	actin A	1.23512e-05	0.908928	0.053224	0.779846	0.934058	4.88528e-06	0.0420787	0.843874	0.046466	0.0257654	0.961746	0.142389	0.199619	-2.77	0.057	-1.01	-0.139	-0.0412	-2.97	-1.06	0.0982	1.04	-1.18	-0.0239	-0.75	-0.652	Tb927.9.8850	OG5_126595	ND	Cytoplasm	ND	FALSE	FALSE	FALSE	FALSE	FALSE	FALSE	FALSE	FALSE	FALSE	FALSE	actin cytoskeleton	structural constituent of cytoskeleton	cytoskeleton organization
Tb927.9.9210	Q386L1	NA	60S ribosomal protein L37, putative	0.0623735	0.314245	0.36951	0.552484	0.259083	0.138492	0.910434	0.0921135	0.0380046	0.00106666	0.0479953	0.978918	0.0875931	1.68	0.883	0.785	0.517	-0.993	1.32	-0.0975	-1.51	1.89	3.23	1.8	-0.0229	-1.53	Tb927.9.9210	OG5_126918	ND	Mitochondrion	ND	FALSE	FALSE	FALSE	FALSE	FALSE	FALSE	FALSE	FALSE	FALSE	FALSE	cytosolic large ribosomal subunit	RNA binding	translation
Tb927.9.9230	Q38E67	NA	hypothetical protein, conserved	0.000538153	0.0255577	0.189359	0.0814919	0.355401	0.868651	0.30846	0.387022	0.000361972	7.60935e-06	0.00440717	0.0886088	0.377905	2.49	1.47	0.832	-1.12	-0.58	-0.103	-0.64	0.542	2.59	3.58	1.95	-1.09	-0.553	Tb927.9.9230	OG5_151845	axoneme, cytoplasm(weak), nucleolus, nucleoplasm(weak)	Nucleus	ND	FALSE	FALSE	FALSE	FALSE	FALSE	FALSE	FALSE	FALSE	FALSE	FALSE	axoneme	N/A	N/A
Tb927.9.9660	Q38E31	ATOM40	Mitochondrial import receptor subunit ATOM40	0.883245	0.334194	0.00211276	0.784984	0.342086	0.27692	0.0204215	0.494357	0.000197931	9.80465e-07	5.86121e-07	0.00271836	0.000511594	0.0712	0.473	1.67	-0.132	-0.465	-0.534	1.2	-0.333	2.14	3.23	3.34	-1.62	-1.95	ATOM40	OG5_149033	mitochondrion(25%), cytoplasm(75%, reticulated, points)	Peroxisome	73-82	FALSE	TRUE	FALSE	FALSE	FALSE	FALSE	FALSE	FALSE	FALSE	FALSE	cytoplasm	N/A	protein import into mitochondrial matrix
Tb927.9.9810	Q38E19	NA	hypothetical protein, conserved	7.62917e-05	0.00163429	0.0287517	0.176843	0.570236	0.89913	0.223095	0.0614554	0.000806494	0.00544955	0.0152007	0.506861	0.0148305	2.55	1.89	1.23	-0.732	0.302	-0.0673	-0.658	1.03	2.04	1.62	1.38	0.354	1.39	Tb927.9.9810	OG5_149030	endoplasmic reticulum, nuclear envelope	Golgi_apparatus	ND	FALSE	FALSE	FALSE	FALSE	FALSE	FALSE	FALSE	FALSE	FALSE	FALSE	endoplasmic reticulum	N/A	N/A
Tb927.9.9940	Q38E08	PACRGB	parkin coregulated gene protein	0.146204	0.055885	0.127769	0.0193087	0.242321	0.0565492	0.666616	0.198787	0.0403738	0.00637713	0.0953647	0.252574	0.882037	1.54	2.07	1.62	2.59	1.23	2.06	-0.447	-1.36	2.23	3.09	1.79	1.2	-0.154	PACRGB	OG5_129548	axoneme	Nucleus	ND	FALSE	FALSE	FALSE	FALSE	FALSE	FALSE	FALSE	FALSE	FALSE	FALSE	axoneme	Hsp70 protein binding	cilium-dependent cell motility
VSA1_TRYBB	P06015	NA	NA	0.110884	0.555918	0.111942	0.439481	0.115182	0.0777742	0.30135	0.402591	0.0822615	0.402566	0.453435	0.386865	0.0966213	-0.754	-0.271	-0.751	-0.357	-0.744	-0.84	-0.48	-0.387	0.826	0.387	0.346	-0.4	-0.788	VSA1_TRYBB	NA	NA	NA	NA	FALSE	FALSE	FALSE	FALSE	FALSE	FALSE	FALSE	FALSE	FALSE	FALSE	NA	NA	NA
