# Supplementary material for: Differentiation granules, a dynamic regulator of T. brucei development.
Source: Research Square preprint supplement (doi:10.21203/rs.3.rs-3442788/v1), 2023-10-20
Supplement: Supplementary file 2 [file 59080d88bde586380c8bcdef.xlsx]

## Sheet: Primers list
primer_id	primer_description	primer_sequence
	ALBA4 (Tag and KO)
OL001	Tb927.4.2030_Upstream forward primer	ATCGCATTAATAACTCACCAAGGTAAACCTgtataatgcagacctgctgc
OL002	Tb927.4.2030_5' sgRNA primer	gaaattaatacgactcactataggCAGCTTGTGCTTGAAAATACgttttagagctagaaatagc
OL003	Tb927.4.2030_Downstream forward primer	CGGGACGGCAGCGATTTGGGTGAAGGCAACggttctggtagtggttccgg
OL004	Tb927.4.2030_Downstream reverse TAG primer	AACAAACAGTGACTTCTCAAAGTGGCACCGccaatttgagagacctgtgc
OL005	Tb927.4.2030_Downstream reverse KO primer	AACAAACAGTGACTTCTCAAAGTGGCACCGccggaaccactaccagaacc
OL006	Tb927.4.2030_3' sgRNA primer	gaaattaatacgactcactataggAGTGGAGCATGCTCGGTTTAgttttagagctagaaatagc
OL007	checkKO_Alba4_F	TCGCATTAATAACTCACCAAGG
OL008	checkKO_Alba4_R	CAAAACAGAAAAAAAAACAT
	ALBA3 (Tag and KO)
OL009	Tb927.4.2040_Upstream forward primer	CCTAGGATTTTTTCTGCCGAGGACTTACCAgtataatgcagacctgctgc
OL010	Tb927.4.2040_Upstream reverse primer	GTACTCGTCACGTGGCGGATATGAAGGCATactacccgatcctgatccag
OL011	Tb927.4.2040_5' sgRNA primer	gaaattaatacgactcactataggTTGAAAATACAAGTTTATGTgttttagagctagaaatagc
OL012	Tb927.4.2040_Downstream reverse KO primer	ACGAACATCAAAGACCACATATATCTCCCTccggaaccactaccagaacc
OL013	Tb927.4.2040_3' sgRNA primer	gaaattaatacgactcactataggATTTGTTTGAAGTGCAGCAAgttttagagctagaaatagc
OL014	checkKO_Alba3_F	TGCCGAGGACTTACCAACAT
OL015	checkKO_Alba3_R	CAAAGACCACATATATCTCC
	Tb927.4.2920 (Tag)
OL016	Tb927.4.2920_Non-barcoded upstream forward	TACCTTTCGCTACGCTTTCTTCCCCTTTTGgtataatgcagacctgctgc
OL017	Tb927.4.2920_Upstream reverse primer	AACATCCTGTGCGGGCGGCGTACAAGTCATactacccgatcctgatccag
OL018	Tb927.4.2920_Upstream sgRNA primer	gaaattaatacgactcactataggCGTGGTACTGTGCGTAATTAgttttagagctagaaatagc
	XRN1 (Tag)
OL019	Tb927.7.4900_Upstream forward primer	GGTGATTACCAAACTGCAAAAAGAAGAAACgtataatgcagacctgctgc
OL020	Tb927.7.4900_Upstream reverse primer	TACCCATCGAAAGAATTTTGGAACACCCATactacccgatcctgatccag
OL021	Tb927.7.4900_5' sgRNA primer	gaaattaatacgactcactataggCTGAAGGGTGAGCAAAGAAAgttttagagctagaaatagc
	ZC3H20 (Tag)
OL022	Tb927.7.2660_3' sgRNA primer	gaaattaatacgactcactataggACGCGCACACGCAAGCAGTAgttttagagctagaaatagc
OL023	Tb927.7.2660_Downstream forward primer	ATTGAAAAAGGGGAAGGGAGGGGCAGGAATggttctggtagtggttccgg
OL024	Tb927.7.2660_Downstream reverse TAG primer	TCCGCACGCTAAATCATAATACAAGCTCCCccaatttgagagacctgtgc
	PABP1 (Tag)
OL025	Tb927.9.9290_Downstream forward primer	TGTGTGCTAAAGGTACACGCCTCAAGCGCTggttctggtagtggttccgg
OL026	Tb927.9.9290_Downstream reverse TAG primer	TAATCAGATTATCACATCTCTCTTTTACCTccaatttgagagacctgtgc
OL027	Tb927.9.9290_3' sgRNA primer	gaaattaatacgactcactataggAACGAATAAGCAAAAACAAAgttttagagctagaaatagc
	PABP2 (Tag)
OL028	Tb927.9.10770_Upstream forward primer	ATATCTAGAGTTTATTAAAAATATAAACCAgtataatgcagacctgctgc
OL029	Tb927.9.10770_Upstream reverse primer	GGAGGGGCTCGCAGCAGCAAATGCAGCCATactacccgatcctgatccag
OL030	Tb927.9.10770_5' sgRNA primer	gaaattaatacgactcactataggTCTCTGGTTGTTCCCTTTCCgttttagagctagaaatagc
OL031	Tb927.9.10770_Downstream forward primer	CTCGACGTGCTCAACCGTCACATTGGCATGggttctggtagtggttccgg
OL032	Tb927.9.10770_Downstream reverse TAG primer	TTTTCTTCAACCTTTTCCTTCCATCTCCCGccaatttgagagacctgtgc
OL033	Tb927.9.10770_3' sgRNA primer	gaaattaatacgactcactataggCGTGCGAGCGGAGAGTCGAAgttttagagctagaaatagc
	RAB7 (Tag)
OL034	Tb927.9.11000_Downstream forward primer	CCTAGTACAAAGAAAAGCGATTGTGCGTGCggttctggtagtggttccgg
OL035	Tb927.9.11000_Downstream TAG reverse primer	CTCCTACATATCTTTCTTTTTTTTCTTCACccaatttgagagacctgtgc
OL036	Tb927.9.11000_Downstream sgRNA primer	gaaattaatacgactcactataggAAGGGTATGAAGGATTGACAgttttagagctagaaatagc
	NEK17 (Tag)
OL037	Tb927.10.5950_Upstream forward primer	ACAATTCAAAAACATTACACTTCCCCACCAgtataatgcagacctgctgc
OL038	Tb927.10.5950_Upstream reverse primer	ACGCCCAATCATTGCATCCGTTGACGACATactacccgatcctgatccag
OL039	Tb927.10.5950_5' sgRNA primer	gaaattaatacgactcactataggAAGAATTTTTTTTTGATGGGgttttagagctagaaatagc
	DRC1 (Tag)
OL040	Tb927.10.7880_Downstream forward primer	AAGCTGTTGTTGGAAACCCGTGCCCATACCggttctggtagtggttccgg
OL041	Tb927.10.7880_Downstream TAG reverse primer	TGGTGTGATGACAGACTTCAAATCTGCGGTccaatttgagagacctgtgc
OL042	Tb927.10.7880_Downstream sgRNA primer	gaaattaatacgactcactataggTTAACTTCCTCCCCTCTCCAgttttagagctagaaatagc
	TbDYRK (KO)
OL043	Tb927.10.15020_Upstream forward primer	TCGGCAATAGCGCCGCCACGATACCAAAGTgtataatgcagacctgctgc
OL044	Tb927.10.15020_5' sgRNA primer	gaaattaatacgactcactataggTGTGGTTGGCAAGGTGTGAGgttttagagctagaaatagc
OL045	Tb927.10.15020_Downstream reverse KO primer	CGGTAAAGGCAGCGATGTCTCGCGCGTCCAccggaaccactaccagaacc
OL046	Tb927.10.15020_3' sgRNA primer	gaaattaatacgactcactataggGGTTCGTTGGGTAGTAGTTGgttttagagctagaaatagc
OL047	inDYRK-5'UTR_forChecking_F	cgagggttacggtcaagaaa
OL048	inDYRK-ORF_R	AAAAGCTGTGTGCCAATGCC
	ZC3H41 (Tag)
OL049	Tb927.11.1980_Downstream forward primer	TGGCATGAGCAACTGAAGCCCAAGACCCTGggttctggtagtggttccgg
OL050	Tb927.11.1980_Downstream TAG reverse primer	ACCGCGTAGTCACCCAGAAGGGGGTGAAACccaatttgagagacctgtgc
OL051	Tb927.11.1980_Downstream sgRNA primer	gaaattaatacgactcactataggCCTCCTCTAACTTTAATGCGgttttagagctagaaatagc
	ALBA2 (Tag)
OL052	Tb927.11.4450_Downstream forward primer	AGGAAGTTGGAAAACGCTGATAAAAAGGAGggttctggtagtggttccgg
OL053	Tb927.11.4450_Downstream reverse TAG primer	CCCTAAGCACACGTAAGTTCGGATTTACCGccaatttgagagacctgtgc
OL054	Tb927.11.4450_3' sgRNA primer	gaaattaatacgactcactataggTAACAAAAAGAGAGAATGAAgttttagagctagaaatagc
	Creation Apex2-Flag plasmid
OL055	add_end_of_APEX2_noStop_BamHI_R	ggatccGTCCAGGGTCAGGCGCTCCAGGGGAGGCAGCTGCAGGGCGTCTGCAAACCCCAGTTCA
OL056	add_end_of_APEX2_Stop_BamHI_R	ggatccTTAGTCCAGGGTCAGGCGCTCCAGGGGAGGCAGCTGCAGGGCGTCTGCAAACCCCAGTTCA
OL057	APEX2_HindIII_F	CGACAAGaagcttGGAAAGAGTTATCCAACTGTGAGTGCA
G00	scaffold	aaaagcaccgactcggtgccactttttcaagttgataacggactagccttattttaacttgctatttctagctctaaaac

## Sheet: Star method table
Reagent type (species) or resource	Designation	Source or reference	Identifiers	Additional information
Biological Resources, Cell line (Trypanosoma brucei)	Trypanosoma brucei EATRO 1125 AnTat1.1 J1339	Rojas et al., 2019	N/A
Biological Resources, Recombinant DNA reagent	pJ1339	Kindly provided by Dr Jack Sunter, Oxford Brookes University	N/A
Biological Resources, Recombinant DNA reagent	pPOTv6	Kindly provided by Dr Sam Dean, Oxford University	N/A
Biological Resources, Recombinant DNA reagent	pPOTv7	Kindly provided by Dr Sam Dean, Oxford University	N/A
Biological Resources, Recombinant DNA reagent	pTOPO PCR blunt II	invitrogen	Cat# 45-0245
Biological Resources, Recombinant DNA reagent	pPOTv7-BLE-TymNG	Kindly provided by Guy Oldrieve	N/A
Biological Resources, Recombinant DNA reagent	pPOTv6-BLA-Apex2-flag	This study	N/A
Biological Resources, Recombinant DNA reagent	pPOTv7-HYG-Apex2-flag	This study	N/A
Biological Resources, Recombinant DNA reagent	2xflag-Apex2-2xflag	IDT	N/A
Biological Resources, Recombinant DNA reagent	pPOTv7-HYG-TbDYRK-NM	Cayla et al., 2020	N/A
Biological Resources, Recombinant DNA reagent	pPOTv7-HYG-TbDYRK-S856G	Cayla et al., 2020	N/A
Biological Resources, Strain, strain background (Mus musculus)	Mouse MF1, female	Charles River	N/A
Biological Resources, Transfected construct	Trypanosoma brucei EATRO 1125 AnTat1.1 J1339_TbDYRK-/-	This study	N/A	Biological Resources, Cell lines generated in Keith Matthews's Lab
Biological Resources, Transfected construct	Trypanosoma brucei EATRO 1125 AnTat1.1 J1339_TbDYRK-/-_addback-NM	This study	N/A	Biological Resources, Cell lines generated in Keith Matthews's Lab
Biological Resources, Transfected construct	Trypanosoma brucei EATRO 1125 AnTat1.1 J1339_TbDYRK-/-_addback-S856G	This study	N/A	Biological Resources, Cell lines generated in Keith Matthews's Lab
Biological Resources, Transfected construct	Trypanosoma brucei EATRO 1125 AnTat1.1 J1339_ALBA4-/-	This study	N/A	Biological Resources, Cell lines generated in Keith Matthews's Lab
Biological Resources, Transfected construct	Trypanosoma brucei EATRO 1125 AnTat1.1 J1339_ALBA4::TymNG	This study	N/A	Biological Resources, Cell lines generated in Keith Matthews's Lab
Biological Resources, Transfected construct	Trypanosoma brucei EATRO 1125 AnTat1.1 J1339_ALBA4::Apex2-flag	This study	N/A	Biological Resources, Cell lines generated in Keith Matthews's Lab
Biological Resources, Transfected construct	Trypanosoma brucei EATRO 1125 AnTat1.1 J1339_ALBA3-/+	This study	N/A	Biological Resources, Cell lines generated in Keith Matthews's Lab
Biological Resources, Transfected construct	Trypanosoma brucei EATRO 1125 AnTat1.1 J1339_TymNG::ALBA3	This study	N/A	Biological Resources, Cell lines generated in Keith Matthews's Lab
Biological Resources, Transfected construct	Trypanosoma brucei EATRO 1125 AnTat1.1 J1339_flag-Apex2::ALBA3	This study	N/A	Biological Resources, Cell lines generated in Keith Matthews's Lab
Biological Resources, Transfected construct	Trypanosoma brucei EATRO 1125 AnTat1.1 J1339_TbDYRK-/+_addback-S856G	This study	N/A	Biological Resources, Cell lines generated in Keith Matthews's Lab
Biological Resources, Transfected construct	Trypanosoma brucei EATRO 1125 AnTat1.1 J1339_TbDYRK-/+_addback-S856G	This study	N/A	Biological Resources, Cell lines generated in Keith Matthews's Lab
Biological Resources, Transfected construct	Trypanosoma brucei EATRO 1125 AnTat1.1 J1339_TymNG::Tb927.4.2920	This study	N/A	Biological Resources, Cell lines generated in Keith Matthews's Lab
Biological Resources, Transfected construct	Trypanosoma brucei EATRO 1125 AnTat1.1 J1339_TymNG::XRNA	This study	N/A	Biological Resources, Cell lines generated in Keith Matthews's Lab
Biological Resources, Transfected construct	Trypanosoma brucei EATRO 1125 AnTat1.1 J1339_ZC3H20::TymNG	This study	N/A	Biological Resources, Cell lines generated in Keith Matthews's Lab
Biological Resources, Transfected construct	Trypanosoma brucei EATRO 1125 AnTat1.1 J1339_PABP1::TymNG	This study	N/A	Biological Resources, Cell lines generated in Keith Matthews's Lab
Biological Resources, Transfected construct	Trypanosoma brucei EATRO 1125 AnTat1.1 J1339_TymNG::PABP2	This study	N/A	Biological Resources, Cell lines generated in Keith Matthews's Lab
Biological Resources, Transfected construct	Trypanosoma brucei EATRO 1125 AnTat1.1 J1339_PABP2::TymNG	This study	N/A	Biological Resources, Cell lines generated in Keith Matthews's Lab
Biological Resources, Transfected construct	Trypanosoma brucei EATRO 1125 AnTat1.1 J1339_RAB7::TymNG	This study	N/A	Biological Resources, Cell lines generated in Keith Matthews's Lab
Biological Resources, Transfected construct	Trypanosoma brucei EATRO 1125 AnTat1.1 J1339_TymNG::NEK17	This study	N/A	Biological Resources, Cell lines generated in Keith Matthews's Lab
Biological Resources, Transfected construct	Trypanosoma brucei EATRO 1125 AnTat1.1 J1339_DRC1::Apex2-flag	This study	N/A	Biological Resources, Cell lines generated in Keith Matthews's Lab
Biological Resources, Transfected construct	Trypanosoma brucei EATRO 1125 AnTat1.1 J1339_ZC3H41::TymNG	This study	N/A	Biological Resources, Cell lines generated in Keith Matthews's Lab
Biological Resources, Transfected construct	Trypanosoma brucei EATRO 1125 AnTat1.1 J1339_ALBA2::TymNG	This study	N/A	Biological Resources, Cell lines generated in Keith Matthews's Lab
Biological Resources, Transfected construct	Trypanosoma brucei EATRO 1125 AnTat1.1 J1339_TbDYRK-/-_Alba4::TymNG	This study	N/A	Biological Resources, Cell lines generated in Keith Matthews's Lab
Biological Resources, Transfected construct	Trypanosoma brucei EATRO 1125 AnTat1.1 J1339_TbDYRK-/-_Alba4::Apex2-flag	This study	N/A	Biological Resources, Cell lines generated in Keith Matthews's Lab
Data Availability, gene (trypanosoma brucei)	ALBA4	TritrypDB	Tb927.4.2030
Data Availability, gene (trypanosoma brucei)	ALBA3	TritrypDB	Tb927.4.2040
Data Availability, gene (trypanosoma brucei)	Tb927.4.2920	TritrypDB	Tb927.4.2920
Data Availability, gene (trypanosoma brucei)	XRN1	TritrypDB	Tb927.7.4900
Data Availability, gene (trypanosoma brucei)	ZC3H20	TritrypDB	Tb927.7.2660
Data Availability, gene (trypanosoma brucei)	PABP1	TritrypDB	Tb927.9.9290
Data Availability, gene (trypanosoma brucei)	PABP2	TritrypDB	Tb927.9.10770
Data Availability, gene (trypanosoma brucei)	RAB7	TritrypDB	Tb927.9.11000
Data Availability, gene (trypanosoma brucei)	NEK17	TritrypDB	Tb927.10.5950
Data Availability, gene (trypanosoma brucei)	DRC1	TritrypDB	Tb927.10.7880
Data Availability, gene (trypanosoma brucei)	TbDYRK	TritrypDB	Tb927.10.15020
Data Availability, gene (trypanosoma brucei)	ZC3H41	TritrypDB	Tb927.11.1980
Data Availability, gene (trypanosoma brucei)	ALBA2	TritrypDB	Tb927.11.4450
Data Availability, Software, algorithm	Bioconductor	Bioconductor	http://www.bioconductor.org/
Data Availability, Software, algorithm	Blast	NCBI	https://blast.ncbi.nlm.nih.gov/Blast.cgi
Data Availability, Software, algorithm	ClustalXv2	Larkin et al., 2007	http://www.clustal.org/clustal2/
Data Availability, Software, algorithm	Eukaryotic Linear Motif resource	Dinkel et al., 2016	http://elm.eu.org/infos/about.html
Data Availability, Software, algorithm	Jalview	Waterhouse et al., 2009	N/A
Data Availability, Software, algorithm	LeishGEdit	Beneke et at., 2016	http://www.leishgedit.net/Home.html
Data Availability, Software, algorithm	MUSCLE	Edgar, 2004	https://www.ebi.ac.uk/Tools/msa/muscle/
Data Availability, Software, algorithm	OrthoMCL	Chen et al., 2006	http://orthomcl.org/orthomcl/
Data Availability, Software, algorithm	Pfam	Finn et al., 2016	http://pfam.xfam.org
Data Availability, Software, algorithm	R	R	https://www.r-project.org/
Data Availability, Software, algorithm	Rstudio	Rstudio	https://rstudio.com/
Data Availability, Software, algorithm	TriTrypDB	Amos et al., 2021	http://tritrypdb.org/tritrypdb/
Data Availability, Software, algorithm	FIJI	Schindelin et al., 2012	https://imagej.net/software/fiji/downloads
Data Availability, Software, algorithm	μManager 2.0	Edelstein et al., 2014	https://micro-manager.org/Version_2.0
Data Availability, Software, algorithm	DEP	Zhang et al., 2018	https://bioconductor.org/packages/release/bioc/html/DEP.html
Reagents, Antibody	Anti-Ty1 epitope tag specific BB2 antibody	Bastin et al., 1996; hybridoma cell line a gift of Keith Gull, Oxford University/available through Thermofisher	Cat#MA5-23513; RRID:AB_2610644	Hybrydome mouse monoclonal, clone BB2, WB (1:20), IF (1:5)
Reagents, Antibody	Anti-Mouse AlexaFluor 488	molecular probes	Cat# A1101	Goat polyclonal, IF (1:500)
Reagents, Antibody	Anti-Mouse AlexaFluor 568	abcam	Cat# ab175701	Goat polyclonal, IF (1:500)
Reagents, Antibody	Anti-Rabbit AlexaFluor 488	invitrogen	Cat# A1108	Goat polyclonal, IF (1:500)
Reagents, Antibody	Anti-Rabbit AlexaFluor 568	invitrogen	Cat# A11036	Goat polyclonal, IF (1:500)
Reagents, Antibody	IRDye 680 anti-mouse secondary antibody	Li-Cor	Cat#P/N 925-68070; RRID:AB_2651128	Goat polyclonal, IF (1:5000)
Reagents, Antibody	IRDye 800CW anti-Mouse IgG (H + L) secondary antibody	Li-Cor	Cat#P/N 925-32210; RRID:AB_2687825	Goat polyclonal, IF (1:5000)
Reagents, Antibody	Anti-PAD1	Dean et al., 2009	N/A	Rabbit polyclonal, WB (1:1000), IF (1:1000)
Reagents, Antibody	Anti-Flag (M2 monoclonal)	sigma aldrich	Cat# F1804	Mouse monoclonal, WB (1:2000), IF (1:200)
Reagents, Commercial assay, kit	Dneasy Blood & Tissue kit	Qiagen	Cat# 69506
Reagents, Commercial assay, kit	Monarch DNA Gel extraction kit	NEB	Cat# T1020L
Reagents, Commercial assay, kit	Monarch PCR DNA Cleanup kit	NEB	Cat# T1030S
Reagents, Commercial assay, kit	Rapid DNA ligation kit	invitrogen	Cat# K1423
Reagents, Commercial assay, kit	Zero blunt TOPO PCR cloning kit	invitrogen	Cat# 45-0245
Reagents, Commercial assay, kit	Vivaspin® 500 Centrifugal Concentrator Polyethersulfone, 100 pc	Sartorius	Cat# VS0192
Reagents, Other	Streptavidin IRDye 680RD	Licor	Cat# 926-68079
Reagents, Other	Hygromycin B Gold	InvivoGen	Cat# ant-hg-1
Reagents, Other	Puromycin, dihydrochloride	Calbiochem	Cat# 540411-25mg
Reagents, Other	Blasticidin	InvivoGen	Cat# ant-bl-1
Reagents, Other	Phleomycin	InvivoGen	Cat# ant-ph-1
Reagents, Other	DE52	Whatman	Cat# 4057200
Reagents, Other	Dyneabeads™ MyOne™ Streptavidin C1	Invitrogen	Cat# 65001
Reagents, Other	HMI-9 Medium	Life Technologies	Cat#074-90915
Reagents, Other	NuPAGE 4-12% Bis-Tris Gel	invitrogen	Cat# NP0322BOX
Reagents, Other	NuPAGE MES SDS running buffer (20x)	invitrogen	Cat# NP0002
Reagents, Other	Paraformaldehyde	sigma aldrich	Cat# P6148
Reagents, Other	Phire green hot start II DNA polymerase	thermo scientific	Cat# F-124S
Reagents, Other	ProLong Diamond antifade mount	invitrogen	Cat# P36965
Reagents, Other	Protease inhibitor cocktail completme EDTA-free	Roche	Cat# 11873580001
Reagents, Other	FBS, Heat inactivated	Gibco	Cat# 10500-064
Reagents, Other	dialysed FBS	Sigma-aldrich	Cat# F0392-100ML
Reagents, Other	RapiGest SF	Waters	Cat# 186001861
Reagents, Other	Trypsin Protease, MS Grade	thermo scientific	Cat# 90057

## Sheet: Significant Table Figure 2
	WT_+gluc	WT_-gluc	WT_10min	WT_30min	WT_60min	KO_+gluc	KO_-gluc	KO_10min	KO_30min	KO_60min		Wilcoxon rank sum test with continuity correction
WT_+gluc		1.278e-06	0.07529	2.524e-09	0.001228	0.003511	0.3356	6.694e-12	7.231e-05	0.4287
WT_-gluc			4.434e-05	1.091e-13	2.337e-11	NA	6.486e-06	NA	NA	NA		P<0.05
WT_10min				NA	NA	NA	NA	3.835e-13	NA	NA		P<0.01
WT_30min					NA	NA	NA	NA	8.522e-05	NA		P<0.001
WT_60min						NA	NA	NA	NA	0.1201		NS
KO_+gluc							0.0004284	0.04516	0.4349	0.08753
KO_-gluc								8.097e-15	2.792e-07	0.1693
KO_10min									NA	NA
KO_30min										NA
KO_60min
